# Supplementary material for: Metagenomic analysis reveals unexplored diversity of archaeal virome in the human gut
Source: Research Square preprint supplement (doi:10.21203/rs.3.rs-1667356/v1), 2022-05-25
Supplement: Supplementary file 4 [file 7346cc379d7c6c692688f560.xlsx]

## Sheet: a. 1279 representative contigs
Viral Contig ID	Spacer Sources	Length	Viral Taxonomy	Taxonomic classification method	Host_Phylum	Host_Class	Host_Order	Host_Family	Host_Genus	Host_Species	Viral_Cluster	Checkv_provirus	Provirus_length	Checkv_quality	Checkv_completeness	Checkv_contamination	Source Location	Prevalence	Identified by VirSorter or VirFinder
Enteritis_DCY0308.NODE_12858_2954	GUT_GENOME246782_4_15975	2954	Unassigned		Methanobacteriota	Methanobacteria	Methanobacteriales	Methanobacteriaceae	Methanobrevibacter_A	Methanobrevibacter_A smithii	Outlier	No	NA	Low-quality	7.71	0	China	0.0173319	Yes
Enteritis_DCY0308.NODE_1569_19014	GUT_GENOME263468_1_482597	19014	Unassigned		Methanobacteriota	Methanobacteria	Methanobacteriales	Methanobacteriaceae	Methanobrevibacter_A	Methanobrevibacter_A woesei	Outlier	No	NA	Not-determined	NA	0	China	0.0246849	No
Enteritis_DCY0308.NODE_5622_6212	ERR688624.NODE_1318_21	6212	Unassigned		Methanobacteriota	Methanobacteria	Methanobacteriales	Methanobacteriaceae	Methanobrevibacter_A	Methanobrevibacter_A smithii	VC_330_0	No	NA	Not-determined	NA	0	China	0.00105042	No
Enteritis_DCY0308.NODE_648_40048	GUT_GENOME194277_1_110295	40048	Unassigned		Methanobacteriota	Methanobacteria	Methanobacteriales	Methanobacteriaceae	Methanobrevibacter_A	Methanobrevibacter_A smithii	Outlier	No	NA	Not-determined	NA	0	China	0.0346639	No
Feng_Q_2015_NC_ERR688506.NODE_1464_21827	GUT_GENOME018608_1_36299	21827	Unassigned		Methanobacteriota	Methanobacteria	Methanobacteriales	Methanobacteriaceae	Methanobrevibacter_A	Methanobrevibacter_A smithii	VC_354_0	No	NA	Not-determined	NA	0	Austria	0.00787815	No
Feng_Q_2015_NC_ERR688506.NODE_1562_20726	GUT_GENOME020562_14_876	20726	Unassigned		Methanobacteriota	Methanobacteria	Methanobacteriales	Methanobacteriaceae	Methanobrevibacter_A	Methanobrevibacter_A smithii_A	Outlier	No	NA	Not-determined	NA	0	Austria	0.00052521	No
Feng_Q_2015_NC_ERR688506.NODE_401_57634	GUT_GENOME269219_18_19236	57634	Unassigned		Methanobacteriota	Methanobacteria	Methanobacteriales	Methanobacteriaceae	Methanobrevibacter_A	Methanobrevibacter_A smithii	Outlier	No	NA	Not-determined	NA	0	Austria	0.0168067	No
Feng_Q_2015_NC_ERR688506.NODE_4250_8969	GUT_GENOME246782_8_58078	8969	Unassigned		Methanobacteriota	Methanobacteria	Methanobacteriales	Methanobacteriaceae	Methanobrevibacter_A	Methanobrevibacter_A smithii	Outlier	No	NA	Not-determined	NA	0	Austria	0.0273109	No
Feng_Q_2015_NC_ERR688506.NODE_712_37929	GUT_GENOME066320_3_57785	37929	Unassigned		Methanobacteriota	Methanobacteria	Methanobacteriales	Methanobacteriaceae	Methanobrevibacter_A	Methanobrevibacter_A smithii_A	Outlier	No	NA	Not-determined	NA	0	Austria	0.0798319	No
Feng_Q_2015_NC_ERR688506.NODE_791_35130	GUT_GENOME107745_54_7356	35130	Unassigned		Methanobacteriota	Methanobacteria	Methanobacteriales	Methanobacteriaceae	Methanobrevibacter_A	Methanobrevibacter_A smithii	Outlier	No	NA	Not-determined	NA	0	Austria	0.00262605	No
Feng_Q_2015_NC_ERR688516.NODE_10304_2801	GUT_GENOME268740_5_138571	2801	Unassigned		Methanobacteriota	Methanobacteria	Methanobacteriales	Methanobacteriaceae	Methanobrevibacter_A	Methanobrevibacter_A smithii	Outlier	No	NA	Low-quality	3.96	0	Austria	0.00052521	Yes
Feng_Q_2015_NC_ERR688517.NODE_116_97804	GUT_GENOME018608_1_39351	97804	Unassigned		Methanobacteriota	Methanobacteria	Methanobacteriales	Methanobacteriaceae	Methanobrevibacter_A	Methanobrevibacter_A smithii	Outlier	No	NA	Not-determined	NA	0	Austria	0.289916	No
Feng_Q_2015_NC_ERR688517.NODE_3_335063	GUT_GENOME194277_1_110295	335063	Unassigned		Methanobacteriota	Methanobacteria	Methanobacteriales	Methanobacteriaceae	Methanobrevibacter_A	Methanobrevibacter_A smithii	VC_331_4	No	NA	Not-determined	NA	0	Austria	0.00052521	No
Feng_Q_2015_NC_ERR688517.NODE_40_158718	GUT_GENOME143185_12_220085	158718	Unassigned		Methanobacteriota	Methanobacteria	Methanobacteriales	Methanobacteriaceae	Methanobrevibacter_A	Methanobrevibacter_A smithii_A	VC_334_1	No	NA	Medium-quality	84.33	0	Austria	0.00105042	Yes
Feng_Q_2015_NC_ERR688524.NODE_1162_21650	GUT_GENOME194277_1_110295	21650	Unassigned		Methanobacteriota	Methanobacteria	Methanobacteriales	Methanobacteriaceae	Methanobrevibacter_A	Methanobrevibacter_A smithii	Outlier	No	NA	Not-determined	NA	0	Austria	0.0152311	No
Feng_Q_2015_NC_ERR688525.NODE_14_257992	GUT_GENOME279910_4_62128	257992	Unassigned		Methanobacteriota	Methanobacteria	Methanobacteriales	Methanobacteriaceae	Methanobrevibacter_A	Methanobrevibacter_A smithii	VC_332_0	No	NA	Not-determined	NA	0	Austria	0.0357143	No
Feng_Q_2015_NC_ERR688525.NODE_164_86174	GUT_GENOME269219_18_19236	86174	Unassigned		Methanobacteriota	Methanobacteria	Methanobacteriales	Methanobacteriaceae	Methanobrevibacter_A	Methanobrevibacter_A smithii	Outlier	No	NA	Not-determined	NA	0	Austria	0.0278361	No
Feng_Q_2015_NC_ERR688525.NODE_4_348843	GUT_GENOME066320_3_57785	348843	Duplodnaviria;Heunggongvirae;Uroviricota;Caudoviricetes;Caudovirales	VOGdb markers	Methanobacteriota	Methanobacteria	Methanobacteriales	Methanobacteriaceae	Methanobrevibacter_A	Methanobrevibacter_A smithii_A	VC_357_7	No	NA	Not-determined	NA	0	Austria	0.0336134	Yes
Feng_Q_2015_NC_ERR688525.NODE_40_157640	GUT_GENOME253955_2_249842	157640	Duplodnaviria;Heunggongvirae;Uroviricota;Caudoviricetes;Caudovirales;Myoviridae	VOGdb markers	Methanobacteriota	Methanobacteria	Methanobacteriales	Methanobacteriaceae	Methanobrevibacter_A	Methanobrevibacter_A smithii	VC_328_0	No	NA	High-quality	93.9	0	Austria	0.0262605	No
Feng_Q_2015_NC_ERR688525.NODE_47_150203	GUT_GENOME263468_1_482597	150203	Unassigned		Methanobacteriota	Methanobacteria	Methanobacteriales	Methanobacteriaceae	Methanobrevibacter_A	Methanobrevibacter_A woesei	VC_334_2	No	NA	Not-determined	NA	0	Austria	0.00367647	No
Feng_Q_2015_NC_ERR688525.NODE_79_122797	GUT_GENOME258086_2_60997	122797	Unassigned		Methanobacteriota	Methanobacteria	Methanobacteriales	Methanobacteriaceae	Methanobrevibacter_A	Methanobrevibacter_A smithii	VC_356_2	No	NA	Not-determined	NA	0	Austria	0.0372899	No
Feng_Q_2015_NC_ERR688540.NODE_1021_17892	GUT_GENOME018608_1_39351	17892	Unassigned		Methanobacteriota	Methanobacteria	Methanobacteriales	Methanobacteriaceae	Methanobrevibacter_A	Methanobrevibacter_A smithii	VC_364_0	No	NA	Low-quality	16.56	0	Austria	0.00052521	No
Feng_Q_2015_NC_ERR688540.NODE_7536_4569	CCIS07539127ST-4-0.NODE_11245_229	4569	Unassigned		Methanobacteriota	Methanobacteria	Methanobacteriales	Methanobacteriaceae	Methanobrevibacter_A	Methanobrevibacter_A smithii	Outlier	No	NA	Low-quality	11.96	0	Austria	0.00052521	Yes
Feng_Q_2015_NC_ERR688547.NODE_109_79908	GUT_GENOME284634_22_10926	79908	Duplodnaviria;Heunggongvirae;Uroviricota;Caudoviricetes;Caudovirales	VOGdb markers	Methanobacteriota	Methanobacteria	Methanobacteriales	Methanobacteriaceae	Methanobrevibacter_A	Methanobrevibacter_A smithii	VC_357_4	No	NA	Not-determined	NA	0	Austria	0.00997899	No
Feng_Q_2015_NC_ERR688547.NODE_133_70863	GUT_GENOME107745_54_7356	70863	Unassigned		Methanobacteriota	Methanobacteria	Methanobacteriales	Methanobacteriaceae	Methanobrevibacter_A	Methanobrevibacter_A smithii	VC_331_3	No	NA	Not-determined	NA	0	Austria	0.0304622	No
Feng_Q_2015_NC_ERR688547.NODE_2052_12627	GUT_GENOME143494_1_493869	12627	Unassigned		Methanobacteriota	Methanobacteria	Methanobacteriales	Methanobacteriaceae	Methanosphaera	Methanosphaera stadtmanae	Singleton	No	NA	Not-determined	NA	0	Austria	0.00105042	No
Feng_Q_2015_NC_ERR688547.NODE_443_36221	GUT_GENOME060185_13_536	36221	Unassigned		Methanobacteriota	Methanobacteria	Methanobacteriales	Methanobacteriaceae	Methanobrevibacter_A	Methanobrevibacter_A smithii	Outlier	No	NA	Not-determined	NA	0	Austria	0.0131303	No
Feng_Q_2015_NC_ERR688547.NODE_731_25604	GUT_GENOME265514_19_8607	25604	Unassigned		Methanobacteriota	Methanobacteria	Methanobacteriales	Methanobacteriaceae	Methanobrevibacter_A	Methanobrevibacter_A smithii	Outlier	No	NA	Not-determined	NA	0	Austria	0.00105042	No
Feng_Q_2015_NC_ERR688547.NODE_88_90759	GUT_GENOME020562_14_876	90759	Unassigned		Methanobacteriota	Methanobacteria	Methanobacteriales	Methanobacteriaceae	Methanobrevibacter_A	Methanobrevibacter_A smithii_A	VC_334_1	No	NA	Not-determined	NA	0	Austria	0.0120798	Yes
Feng_Q_2015_NC_ERR688553.NODE_116_77095	GUT_GENOME282742_6_115569	77095	Unassigned		Methanobacteriota	Methanobacteria	Methanobacteriales	Methanobacteriaceae	Methanobrevibacter_A	Methanobrevibacter_A smithii	Outlier	No	NA	Not-determined	NA	0	Austria	0.0162815	No
Feng_Q_2015_NC_ERR688553.NODE_1530_15294	GUT_GENOME011061_10_783	15294	Unassigned		Methanobacteriota	Methanobacteria	Methanobacteriales	Methanobacteriaceae	Methanobrevibacter_A	Methanobrevibacter_A smithii	VC_360_0	No	NA	Not-determined	NA	0	Austria	0.0204832	No
Feng_Q_2015_NC_ERR688553.NODE_198_54688	GUT_GENOME143185_12_220085	54688	Unassigned		Methanobacteriota	Methanobacteria	Methanobacteriales	Methanobacteriaceae	Methanobrevibacter_A	Methanobrevibacter_A smithii_A	Outlier	No	NA	Not-determined	NA	0	Austria	0.00210084	Yes
Feng_Q_2015_NC_ERR688553.NODE_264_47838	GUT_GENOME194277_1_110295	47838	Unassigned		Methanobacteriota	Methanobacteria	Methanobacteriales	Methanobacteriaceae	Methanobrevibacter_A	Methanobrevibacter_A smithii	Outlier	No	NA	Not-determined	NA	0	Austria	0.0183824	No
Feng_Q_2015_NC_ERR688555.NODE_117_68535	GUT_GENOME282742_6_115569	68535	Unassigned		Methanobacteriota	Methanobacteria	Methanobacteriales	Methanobacteriaceae	Methanobrevibacter_A	Methanobrevibacter_A smithii	Outlier	No	NA	Not-determined	NA	0	Austria	0.0220588	No
Feng_Q_2015_NC_ERR688555.NODE_16_180361	GUT_GENOME194277_1_111100	180361	Unassigned		Methanobacteriota	Methanobacteria	Methanobacteriales	Methanobacteriaceae	Methanobrevibacter_A	Methanobrevibacter_A smithii	VC_331_13	No	NA	Not-determined	NA	0	Austria	0.0252101	No
Feng_Q_2015_NC_ERR688555.NODE_177_54354	GUT_GENOME247693_325_79	54354	Unassigned		Methanobacteriota	Methanobacteria	Methanobacteriales	Methanobacteriaceae	Methanobrevibacter_A	Methanobrevibacter_A smithii	Outlier	No	NA	Not-determined	NA	0	Austria	0.0267857	No
Feng_Q_2015_NC_ERR688555.NODE_27_145559	GUT_GENOME143185_16_1306	145559	Duplodnaviria;Heunggongvirae;Uroviricota;Caudoviricetes;Caudovirales	VOGdb markers	Methanobacteriota	Methanobacteria	Methanobacteriales	Methanobacteriaceae	Methanobrevibacter_A	Methanobrevibacter_A smithii_A	VC_329_9	No	NA	Not-determined	NA	0	Austria	0.0105042	No
Feng_Q_2015_NC_ERR688555.NODE_324_37017	ERR688624.NODE_1318_21	37017	Unassigned		Methanobacteriota	Methanobacteria	Methanobacteriales	Methanobacteriaceae	Methanobrevibacter_A	Methanobrevibacter_A smithii	Outlier	No	NA	Not-determined	NA	0	Austria	0.0173319	No
Feng_Q_2015_NC_ERR688555.NODE_95_78185	GUT_GENOME261695_15_32706	78185	Duplodnaviria;Heunggongvirae;Uroviricota;Caudoviricetes;Caudovirales	VOGdb markers	Methanobacteriota	Methanobacteria	Methanobacteriales	Methanobacteriaceae	Methanobrevibacter_A	Methanobrevibacter_A smithii	VC_327_4	No	NA	Not-determined	NA	0	Austria	0.00210084	No
Feng_Q_2015_NC_ERR688556.NODE_11_243924	GUT_GENOME246782_8_59663	243924	Unassigned		Methanobacteriota	Methanobacteria	Methanobacteriales	Methanobacteriaceae	Methanobrevibacter_A	Methanobrevibacter_A smithii	VC_331_14	No	NA	Not-determined	NA	0	Austria	0.0136555	No
Feng_Q_2015_NC_ERR688556.NODE_160_60631	GUT_GENOME194277_1_110295	60631	Unassigned		Methanobacteriota	Methanobacteria	Methanobacteriales	Methanobacteriaceae	Methanobrevibacter_A	Methanobrevibacter_A smithii	Outlier	No	NA	Not-determined	NA	0	Austria	0.00052521	No
Feng_Q_2015_NC_ERR688556.NODE_448_29909	GUT_GENOME279910_4_62128	29909	Unassigned		Methanobacteriota	Methanobacteria	Methanobacteriales	Methanobacteriaceae	Methanobrevibacter_A	Methanobrevibacter_A smithii	Outlier	No	NA	Not-determined	NA	0	Austria	0.0635504	No
Feng_Q_2015_NC_ERR688556.NODE_746_20965	GUT_GENOME259830_2_112204	20965	Unassigned		Methanobacteriota	Methanobacteria	Methanobacteriales	Methanobacteriaceae	Methanobrevibacter_A	Methanobrevibacter_A smithii	Outlier	No	NA	Not-determined	NA	0	Austria	0.0194328	No
Feng_Q_2015_NC_ERR688558.NODE_36_162037	GUT_GENOME018608_1_36299	162037	Unassigned		Methanobacteriota	Methanobacteria	Methanobacteriales	Methanobacteriaceae	Methanobrevibacter_A	Methanobrevibacter_A smithii	VC_331_2	No	NA	Not-determined	NA	0	Austria	0.0309874	No
Feng_Q_2015_NC_ERR688558.NODE_361_51952	GUT_GENOME066320_3_57785	51952	Unassigned		Methanobacteriota	Methanobacteria	Methanobacteriales	Methanobacteriaceae	Methanobrevibacter_A	Methanobrevibacter_A smithii_A	Outlier	No	NA	Not-determined	NA	0	Austria	0.00052521	No
Feng_Q_2015_NC_ERR688558.NODE_46_155326	CCIS50471204ST-4-0.NODE_1624_24832	155326	Unassigned		Methanobacteriota	Methanobacteria	Methanobacteriales	Methanobacteriaceae	Methanobrevibacter_A	Methanobrevibacter_A smithii_A	VC_356_2	No	NA	Not-determined	NA	0	Austria	0.00210084	No
Feng_Q_2015_NC_ERR688558.NODE_8_356872	GUT_GENOME279910_4_62128	356872	Unassigned		Methanobacteriota	Methanobacteria	Methanobacteriales	Methanobacteriaceae	Methanobrevibacter_A	Methanobrevibacter_A smithii	VC_331_7	No	NA	Not-determined	NA	0	Austria	0.00735294	No
Feng_Q_2015_NC_ERR688559.NODE_137_87077	GUT_GENOME279910_4_62128	87077	Unassigned		Methanobacteriota	Methanobacteria	Methanobacteriales	Methanobacteriaceae	Methanobrevibacter_A	Methanobrevibacter_A smithii	VC_332_1	No	NA	Not-determined	NA	0	Austria	0.00052521	No
Feng_Q_2015_NC_ERR688559.NODE_2248_11546	GUT_GENOME143185_16_1306	11546	Unassigned		Methanobacteriota	Methanobacteria	Methanobacteriales	Methanobacteriaceae	Methanobrevibacter_A	Methanobrevibacter_A smithii_A	Singleton	No	NA	Not-determined	NA	0	Austria	0.0204832	No
Feng_Q_2015_NC_ERR688559.NODE_255_57902	GUT_GENOME261695_15_32706	57902	Duplodnaviria;Heunggongvirae;Uroviricota;Caudoviricetes;Caudovirales	VOGdb markers	Methanobacteriota	Methanobacteria	Methanobacteriales	Methanobacteriaceae	Methanobrevibacter_A	Methanobrevibacter_A smithii	VC_327_4	No	NA	Not-determined	NA	0	Austria	0.0252101	No
Feng_Q_2015_NC_ERR688559.NODE_422_41089	GUT_GENOME018608_1_39351	41089	Unassigned		Methanobacteriota	Methanobacteria	Methanobacteriales	Methanobacteriaceae	Methanobrevibacter_A	Methanobrevibacter_A smithii	Outlier	No	NA	Not-determined	NA	0	Austria	0.00262605	No
Feng_Q_2015_NC_ERR688559.NODE_616_31455	GUT_GENOME259830_2_112204	31455	Unassigned		Methanobacteriota	Methanobacteria	Methanobacteriales	Methanobacteriaceae	Methanobrevibacter_A	Methanobrevibacter_A smithii	Outlier	No	NA	Not-determined	NA	0	Austria	0.0173319	No
Feng_Q_2015_NC_ERR688564.NODE_124_96826	GUT_GENOME284814_21_16225	96826	Unassigned		Methanobacteriota	Methanobacteria	Methanobacteriales	Methanobacteriaceae	Methanobrevibacter_A	Methanobrevibacter_A smithii_A	VC_333_0	No	NA	Not-determined	NA	0	Austria	0.0210084	No
Feng_Q_2015_NC_ERR688564.NODE_1308_21004	GUT_GENOME263468_1_482597	21004	Unassigned		Methanobacteriota	Methanobacteria	Methanobacteriales	Methanobacteriaceae	Methanobrevibacter_A	Methanobrevibacter_A woesei	VC_362_0	No	NA	Not-determined	NA	0	Austria	0.00105042	No
Feng_Q_2015_NC_ERR688564.NODE_132_95137	GUT_GENOME279910_4_62128	95137	Unassigned		Methanobacteriota	Methanobacteria	Methanobacteriales	Methanobacteriaceae	Methanobrevibacter_A	Methanobrevibacter_A smithii	VC_332_1	No	NA	Not-determined	NA	0	Austria	0.00262605	No
Feng_Q_2015_NC_ERR688564.NODE_188_84854	GUT_GENOME269219_18_19236	84854	Unassigned		Methanobacteriota	Methanobacteria	Methanobacteriales	Methanobacteriaceae	Methanobrevibacter_A	Methanobrevibacter_A smithii	Outlier	No	NA	Not-determined	NA	0	Austria	0.00052521	No
Feng_Q_2015_NC_ERR688564.NODE_270_68917	CCIS50471204ST-4-0.NODE_1624_24832	68917	Unassigned		Methanobacteriota	Methanobacteria	Methanobacteriales	Methanobacteriaceae	Methanobrevibacter_A	Methanobrevibacter_A smithii_A	VC_356_3	No	NA	Not-determined	NA	0	Austria	0.00105042	No
Feng_Q_2015_NC_ERR688564.NODE_36_168274	GUT_GENOME284192_60_6919	168274	Duplodnaviria;Heunggongvirae;Uroviricota;Caudoviricetes;Caudovirales	VOGdb markers	Methanobacteriota	Methanobacteria	Methanobacteriales	Methanobacteriaceae	Methanobrevibacter_A	Methanobrevibacter_A smithii_A	VC_329_6	No	NA	Not-determined	NA	0	Austria	0.0115546	No
Feng_Q_2015_NC_ERR688564.NODE_589_40354	GUT_GENOME060185_13_536	40354	Unassigned		Methanobacteriota	Methanobacteria	Methanobacteriales	Methanobacteriaceae	Methanobrevibacter_A	Methanobrevibacter_A smithii	Outlier	No	NA	Not-determined	NA	0	Austria	0.0210084	No
Feng_Q_2015_NC_ERR688567.NODE_103_94083	GUT_GENOME253955_2_249842	94083	Duplodnaviria;Heunggongvirae;Uroviricota;Caudoviricetes;Caudovirales;Myoviridae	VOGdb markers	Methanobacteriota	Methanobacteria	Methanobacteriales	Methanobacteriaceae	Methanobrevibacter_A	Methanobrevibacter_A smithii	VC_328_0	No	NA	Not-determined	NA	0	Austria	0.00682773	No
Feng_Q_2015_NC_ERR688567.NODE_107_91730	GUT_GENOME018608_1_39351	91730	Unassigned		Methanobacteriota	Methanobacteria	Methanobacteriales	Methanobacteriaceae	Methanobrevibacter_A	Methanobrevibacter_A smithii	Outlier	No	NA	Not-determined	NA	0	Austria	0.0262605	No
Feng_Q_2015_NC_ERR688567.NODE_11_337426	GUT_GENOME066320_3_57785	337426	Duplodnaviria;Heunggongvirae;Uroviricota;Caudoviricetes;Caudovirales	VOGdb markers	Methanobacteriota	Methanobacteria	Methanobacteriales	Methanobacteriaceae	Methanobrevibacter_A	Methanobrevibacter_A smithii_A	VC_357_7	No	NA	Not-determined	NA	0	Austria	0.00052521	Yes
Feng_Q_2015_NC_ERR688567.NODE_120_87774	GUT_GENOME269219_18_19236	87774	Unassigned		Methanobacteriota	Methanobacteria	Methanobacteriales	Methanobacteriaceae	Methanobrevibacter_A	Methanobrevibacter_A smithii	Outlier	No	NA	Not-determined	NA	0	Austria	0.0210084	No
Feng_Q_2015_NC_ERR688567.NODE_33_179828	GUT_GENOME269311_7_91006	179828	Duplodnaviria;Heunggongvirae;Uroviricota;Caudoviricetes;Caudovirales	VOGdb markers	Methanobacteriota	Methanobacteria	Methanobacteriales	Methanobacteriaceae	Methanobrevibacter_A	Methanobrevibacter_A smithii	VC_329_4	No	NA	High-quality	100	0	Austria	0.00052521	No
Feng_Q_2015_NC_ERR688567.NODE_352_44489	GUT_GENOME194277_1_110295	44489	Unassigned		Methanobacteriota	Methanobacteria	Methanobacteriales	Methanobacteriaceae	Methanobrevibacter_A	Methanobrevibacter_A smithii	Outlier	No	NA	Not-determined	NA	0	Austria	0.0304622	No
Feng_Q_2015_NC_ERR688567.NODE_49_144613	GUT_GENOME258086_2_60997	144613	Unassigned		Methanobacteriota	Methanobacteria	Methanobacteriales	Methanobacteriaceae	Methanobrevibacter_A	Methanobrevibacter_A smithii	VC_356_2	No	NA	Not-determined	NA	0	Austria	0.00210084	No
Feng_Q_2015_NC_ERR688567.NODE_6_356251	GUT_GENOME263468_1_482597	356251	Unassigned		Methanobacteriota	Methanobacteria	Methanobacteriales	Methanobacteriaceae	Methanobrevibacter_A	Methanobrevibacter_A woesei	VC_334_3	No	NA	High-quality	100	0	Austria	0.00105042	Yes
Feng_Q_2015_NC_ERR688567.NODE_92_98026	GUT_GENOME284814_21_16225	98026	Unassigned		Methanobacteriota	Methanobacteria	Methanobacteriales	Methanobacteriaceae	Methanobrevibacter_A	Methanobrevibacter_A smithii_A	VC_333_0	No	NA	Not-determined	NA	0	Austria	0.019958	No
Feng_Q_2015_NC_ERR688567.NODE_96_97017	GUT_GENOME279910_4_62128	97017	Unassigned		Methanobacteriota	Methanobacteria	Methanobacteriales	Methanobacteriaceae	Methanobrevibacter_A	Methanobrevibacter_A smithii	VC_332_1	No	NA	Not-determined	NA	0	Austria	0.00052521	No
Feng_Q_2015_NC_ERR688569.NODE_2_530353	GUT_GENOME247414_2_5385	530353	Duplodnaviria;Heunggongvirae;Uroviricota;Caudoviricetes;Caudovirales	VOGdb markers	Methanobacteriota	Methanobacteria	Methanobacteriales	Methanobacteriaceae	Methanobrevibacter_A	Methanobrevibacter_A smithii	Overlap (VC_357/VC_358)	No	NA	Not-determined	NA	0	Austria	0.0220588	Yes
Feng_Q_2015_NC_ERR688569.NODE_24_224744	GUT_GENOME269219_18_19236	224744	Unassigned		Methanobacteriota	Methanobacteria	Methanobacteriales	Methanobacteriaceae	Methanobrevibacter_A	Methanobrevibacter_A smithii	VC_331_13	No	NA	Not-determined	NA	0	Austria	0.00052521	No
Feng_Q_2015_NC_ERR688569.NODE_274_58266	GUT_GENOME018608_1_39351	58266	Unassigned		Methanobacteriota	Methanobacteria	Methanobacteriales	Methanobacteriaceae	Methanobrevibacter_A	Methanobrevibacter_A smithii	Outlier	No	NA	Not-determined	NA	0	Austria	0.0241597	No
Feng_Q_2015_NC_ERR688569.NODE_34_181591	GUT_GENOME143185_12_220085	181591	Unassigned		Methanobacteriota	Methanobacteria	Methanobacteriales	Methanobacteriaceae	Methanobrevibacter_A	Methanobrevibacter_A smithii_A	VC_334_1	No	NA	Not-determined	NA	0	Austria	0.0252101	Yes
Feng_Q_2015_NC_ERR688569.NODE_59_138225	GUT_GENOME143185_16_1306	138225	Duplodnaviria;Heunggongvirae;Uroviricota;Caudoviricetes;Caudovirales	VOGdb markers	Methanobacteriota	Methanobacteria	Methanobacteriales	Methanobacteriaceae	Methanobrevibacter_A	Methanobrevibacter_A smithii_A	VC_329_5	No	NA	Not-determined	NA	0	Austria	0.0173319	No
Feng_Q_2015_NC_ERR688569.NODE_65_130683	GUT_GENOME253955_2_249842	130683	Duplodnaviria;Heunggongvirae;Uroviricota;Caudoviricetes;Caudovirales;Myoviridae	VOGdb markers	Methanobacteriota	Methanobacteria	Methanobacteriales	Methanobacteriaceae	Methanobrevibacter_A	Methanobrevibacter_A smithii	VC_328_0	No	NA	Not-determined	NA	0	Austria	0.0572479	No
Feng_Q_2015_NC_ERR688570.NODE_22574_1751	GUT_GENOME282407_15_5248	1751	Unassigned		Methanobacteriota	Methanobacteria	Methanobacteriales	Methanobacteriaceae	Methanobrevibacter_A	Methanobrevibacter_A smithii_A	Outlier	No	NA	Low-quality	4.59	0	Austria	0.0183824	No
Feng_Q_2015_NC_ERR688570.NODE_896_16244	GUT_GENOME269219_18_19236	16244	Unassigned		Methanobacteriota	Methanobacteria	Methanobacteriales	Methanobacteriaceae	Methanobrevibacter_A	Methanobrevibacter_A smithii	Outlier	No	NA	Not-determined	NA	0	Austria	0	No
Feng_Q_2015_NC_ERR688574.NODE_183341_294	GUT_GENOME256439_3_13449	294	Unassigned		Methanobacteriota	Methanobacteria	Methanobacteriales	Methanobacteriaceae	Methanobrevibacter_A	Methanobrevibacter_A smithii	Singleton	No	NA	Not-determined	NA	0	Austria	0.00052521	Yes
Feng_Q_2015_NC_ERR688574.NODE_50198_1001	GUT_GENOME239133_175_27225	1001	Unassigned		Methanobacteriota	Methanobacteria	Methanobacteriales	Methanobacteriaceae	Methanobrevibacter_A	Methanobrevibacter_A smithii_A	Singleton	No	NA	Not-determined	NA	0	Austria	0.00210084	No
Feng_Q_2015_NC_ERR688580.NODE_71_98157	GUT_GENOME246782_8_59663	98157	Unassigned		Methanobacteriota	Methanobacteria	Methanobacteriales	Methanobacteriaceae	Methanobrevibacter_A	Methanobrevibacter_A smithii	VC_331_11	No	NA	Not-determined	NA	0	Austria	0	No
Feng_Q_2015_NC_ERR688580.NODE_89_84760	ERR688624.NODE_1318_21	84760	Duplodnaviria;Heunggongvirae;Uroviricota;Caudoviricetes;Caudovirales;Myoviridae	VOGdb markers	Methanobacteriota	Methanobacteria	Methanobacteriales	Methanobacteriaceae	Methanobrevibacter_A	Methanobrevibacter_A smithii	VC_328_0	No	NA	Not-determined	NA	0	Austria	0.00157563	No
Feng_Q_2015_NC_ERR688585.NODE_65_76082	GUT_GENOME269219_18_19236	76082	Unassigned		Methanobacteriota	Methanobacteria	Methanobacteriales	Methanobacteriaceae	Methanobrevibacter_A	Methanobrevibacter_A smithii	Outlier	No	NA	Not-determined	NA	0	Austria	0.0231092	No
Feng_Q_2015_NC_ERR688586.NODE_6124_6133	GUT_GENOME194277_1_111100	6133	Unassigned		Methanobacteriota	Methanobacteria	Methanobacteriales	Methanobacteriaceae	Methanobrevibacter_A	Methanobrevibacter_A smithii	VC_361_0	No	NA	Low-quality	5.49	0	Austria	0.00052521	No
Feng_Q_2015_NC_ERR688586.NODE_82094_779	GUT_GENOME246782_8_58078	779	Unassigned		Methanobacteriota	Methanobacteria	Methanobacteriales	Methanobacteriaceae	Methanobrevibacter_A	Methanobrevibacter_A smithii	VC_375_0	No	NA	Low-quality	1.95	0	Austria	0.0231092	No
Feng_Q_2015_NC_ERR688589.NODE_10_365688	GUT_GENOME066320_3_57785	365688	Duplodnaviria;Heunggongvirae;Uroviricota;Caudoviricetes;Caudovirales	VOGdb markers	Methanobacteriota	Methanobacteria	Methanobacteriales	Methanobacteriaceae	Methanobrevibacter_A	Methanobrevibacter_A smithii_A	Overlap (VC_357/VC_358)	No	NA	Not-determined	NA	0	Austria	0.049895	Yes
Feng_Q_2015_NC_ERR688589.NODE_249_54870	GUT_GENOME263468_1_482597	54870	Unassigned		Methanobacteriota	Methanobacteria	Methanobacteriales	Methanobacteriaceae	Methanobrevibacter_A	Methanobrevibacter_A woesei	Outlier	No	NA	Low-quality	29.15	0	Austria	0.0210084	No
Feng_Q_2015_NC_ERR688589.NODE_26_209350	GUT_GENOME018608_1_39351	209350	Duplodnaviria;Heunggongvirae;Uroviricota;Caudoviricetes;Caudovirales	VOGdb markers	Methanobacteriota	Methanobacteria	Methanobacteriales	Methanobacteriaceae	Methanobrevibacter_A	Methanobrevibacter_A smithii	VC_329_8	No	NA	Not-determined	NA	0	Austria	0.00105042	No
Feng_Q_2015_NC_ERR688589.NODE_37_178501	CCIS50471204ST-4-0.NODE_1624_24832	178501	Unassigned		Methanobacteriota	Methanobacteria	Methanobacteriales	Methanobacteriaceae	Methanobrevibacter_A	Methanobrevibacter_A smithii_A	VC_333_0	No	NA	Not-determined	NA	0	Austria	0.0288866	No
Feng_Q_2015_NC_ERR688589.NODE_46_157332	GUT_GENOME018608_1_36299	157332	Unassigned		Methanobacteriota	Methanobacteria	Methanobacteriales	Methanobacteriaceae	Methanobrevibacter_A	Methanobrevibacter_A smithii	VC_331_3	No	NA	Not-determined	NA	0	Austria	0.0567227	No
Feng_Q_2015_NC_ERR688589.NODE_52_150807	GUT_GENOME020562_14_876	150807	Unassigned		Methanobacteriota	Methanobacteria	Methanobacteriales	Methanobacteriaceae	Methanobrevibacter_A	Methanobrevibacter_A smithii_A	VC_334_1	No	NA	Not-determined	NA	0	Austria	0.0183824	Yes
Feng_Q_2015_NC_ERR688589.NODE_61_134781	GUT_GENOME269219_18_19236	134781	Unassigned		Methanobacteriota	Methanobacteria	Methanobacteriales	Methanobacteriaceae	Methanobrevibacter_A	Methanobrevibacter_A smithii	Outlier	No	NA	Not-determined	NA	0	Austria	0.0178571	No
Feng_Q_2015_NC_ERR688589.NODE_76_116818	GUT_GENOME279910_4_62128	116818	Unassigned		Methanobacteriota	Methanobacteria	Methanobacteriales	Methanobacteriaceae	Methanobrevibacter_A	Methanobrevibacter_A smithii	VC_332_1	No	NA	Not-determined	NA	0	Austria	0.0147059	No
Feng_Q_2015_NC_ERR688592.NODE_149_84504	GUT_GENOME251364_2_123712	84504	Unassigned		Methanobacteriota	Methanobacteria	Methanobacteriales	Methanobacteriaceae	Methanobrevibacter_A	Methanobrevibacter_A smithii_A	VC_331_3	No	NA	Not-determined	NA	0	Austria	0.0110294	No
Feng_Q_2015_NC_ERR688592.NODE_190_74602	GUT_GENOME135949_10_18798	74602	Unassigned		Methanobacteriota	Methanobacteria	Methanobacteriales	Methanobacteriaceae	Methanobrevibacter_A	Methanobrevibacter_A smithii	Outlier	No	NA	Not-determined	NA	0	Austria	0.00787815	No
Feng_Q_2015_NC_ERR688592.NODE_2083_15290	GUT_GENOME259830_12_62046	15290	Unassigned		Methanobacteriota	Methanobacteria	Methanobacteriales	Methanobacteriaceae	Methanobrevibacter_A	Methanobrevibacter_A smithii	Outlier	No	NA	Low-quality	40.11	0	Austria	0.00472689	Yes
Feng_Q_2015_NC_ERR688592.NODE_804_31889	GUT_GENOME259830_2_112204	31889	Unassigned		Methanobacteriota	Methanobacteria	Methanobacteriales	Methanobacteriaceae	Methanobrevibacter_A	Methanobrevibacter_A smithii	Outlier	No	NA	Not-determined	NA	0	Austria	0.0168067	No
Feng_Q_2015_NC_ERR688592.NODE_926_28979	ERR688627.NODE_870_19814	28979	Unassigned		Methanobacteriota	Methanobacteria	Methanobacteriales	Methanobacteriaceae	Methanobrevibacter_A	Methanobrevibacter_A smithii	Outlier	No	NA	Not-determined	NA	0	Austria	0.0267857	No
Feng_Q_2015_NC_ERR688593.NODE_117_79004	GUT_GENOME253955_2_249842	79004	Duplodnaviria;Heunggongvirae;Uroviricota;Caudoviricetes;Caudovirales;Myoviridae	VOGdb markers	Methanobacteriota	Methanobacteria	Methanobacteriales	Methanobacteriaceae	Methanobrevibacter_A	Methanobrevibacter_A smithii	VC_328_0	No	NA	Not-determined	NA	0	Austria	0.00052521	No
Feng_Q_2015_NC_ERR688593.NODE_223_57434	GUT_GENOME018608_1_39351	57434	Unassigned		Methanobacteriota	Methanobacteria	Methanobacteriales	Methanobacteriaceae	Methanobrevibacter_A	Methanobrevibacter_A smithii	Outlier	No	NA	Not-determined	NA	0	Austria	0.0456933	No
Feng_Q_2015_NC_ERR688593.NODE_462_38307	GUT_GENOME259830_12_62046	38307	Duplodnaviria;Heunggongvirae;Uroviricota;Caudoviricetes;Caudovirales	Viral database	Methanobacteriota	Methanobacteria	Methanobacteriales	Methanobacteriaceae	Methanobrevibacter_A	Methanobrevibacter_A smithii	VC_324_0	No	NA	High-quality	100	0	Austria	0.0178571	Yes
Feng_Q_2015_NC_ERR688593.NODE_61_106133	CCIS50471204ST-4-0.NODE_1624_24832	106133	Unassigned		Methanobacteriota	Methanobacteria	Methanobacteriales	Methanobacteriaceae	Methanobrevibacter_A	Methanobrevibacter_A smithii_A	VC_356_2	No	NA	Not-determined	NA	0	Austria	0.00105042	No
Feng_Q_2015_NC_ERR688604.NODE_185_81020	ERR688624.NODE_1318_21	81020	Duplodnaviria;Heunggongvirae;Uroviricota;Caudoviricetes;Caudovirales;Myoviridae	VOGdb markers	Methanobacteriota	Methanobacteria	Methanobacteriales	Methanobacteriaceae	Methanobrevibacter_A	Methanobrevibacter_A smithii	VC_328_0	No	NA	Not-determined	NA	0	Austria	0.00157563	No
Feng_Q_2015_NC_ERR688605.NODE_11_256862	GUT_GENOME279910_4_62128	256862	Unassigned		Methanobacteriota	Methanobacteria	Methanobacteriales	Methanobacteriaceae	Methanobrevibacter_A	Methanobrevibacter_A smithii	VC_332_0	No	NA	Not-determined	NA	0	Austria	0.0241597	No
Feng_Q_2015_NC_ERR688605.NODE_12_251688	GUT_GENOME258086_2_60997	251688	Unassigned		Methanobacteriota	Methanobacteria	Methanobacteriales	Methanobacteriaceae	Methanobrevibacter_A	Methanobrevibacter_A smithii	VC_356_4	No	NA	Not-determined	NA	0	Austria	0.00472689	No
Feng_Q_2015_NC_ERR688605.NODE_144_63822	GUT_GENOME230857_21_44924	63822	Duplodnaviria;Heunggongvirae;Uroviricota;Caudoviricetes;Caudovirales	Viral database	Methanobacteriota	Methanobacteria	Methanobacteriales	Methanobacteriaceae	Methanobrevibacter_A	Methanobrevibacter_A smithii	VC_359_0	No	NA	High-quality	100	0	Austria	0.00840336	Yes
Feng_Q_2015_NC_ERR688605.NODE_29_163335	GUT_GENOME018608_1_36299	163335	Unassigned		Methanobacteriota	Methanobacteria	Methanobacteriales	Methanobacteriaceae	Methanobrevibacter_A	Methanobrevibacter_A smithii	VC_331_3	No	NA	Not-determined	NA	0	Austria	0.012605	No
Feng_Q_2015_NC_ERR688605.NODE_42_133535	GUT_GENOME018608_1_39351	133535	Duplodnaviria;Heunggongvirae;Uroviricota;Caudoviricetes;Caudovirales	VOGdb markers	Methanobacteriota	Methanobacteria	Methanobacteriales	Methanobacteriaceae	Methanobrevibacter_A	Methanobrevibacter_A smithii	VC_329_9	No	NA	Medium-quality	65.29	0	Austria	0.00210084	No
Feng_Q_2015_NC_ERR688610.NODE_14_279815	GUT_GENOME258086_2_60997	279815	Unassigned		Methanobacteriota	Methanobacteria	Methanobacteriales	Methanobacteriaceae	Methanobrevibacter_A	Methanobrevibacter_A smithii	VC_356_4	No	NA	Not-determined	NA	0	Austria	0	No
Feng_Q_2015_NC_ERR688610.NODE_3_496081	GUT_GENOME246782_8_59663	496081	Unassigned		Methanobacteriota	Methanobacteria	Methanobacteriales	Methanobacteriaceae	Methanobrevibacter_A	Methanobrevibacter_A smithii	VC_331_9	No	NA	Not-determined	NA	0	Austria	0.0488445	Yes
Feng_Q_2015_NC_ERR688610.NODE_6_403104	GUT_GENOME261695_15_32706	403104	Duplodnaviria;Heunggongvirae;Uroviricota;Caudoviricetes;Caudovirales	VOGdb markers	Methanobacteriota	Methanobacteria	Methanobacteriales	Methanobacteriaceae	Methanobrevibacter_A	Methanobrevibacter_A smithii	VC_357_8	No	NA	Not-determined	NA	0	Austria	0.00105042	Yes
Feng_Q_2015_NC_ERR688611.NODE_136_84245	GUT_GENOME258086_2_60997	84245	Unassigned		Methanobacteriota	Methanobacteria	Methanobacteriales	Methanobacteriaceae	Methanobrevibacter_A	Methanobrevibacter_A smithii	Outlier	No	NA	Not-determined	NA	0	Austria	0.00105042	No
Feng_Q_2015_NC_ERR688611.NODE_169_75697	GUT_GENOME253955_2_249842	75697	Duplodnaviria;Heunggongvirae;Uroviricota;Caudoviricetes;Caudovirales;Myoviridae	VOGdb markers	Methanobacteriota	Methanobacteria	Methanobacteriales	Methanobacteriaceae	Methanobrevibacter_A	Methanobrevibacter_A smithii	VC_328_0	No	NA	Not-determined	NA	0	Austria	0.00630252	No
Feng_Q_2015_NC_ERR688611.NODE_2215_14379	GUT_GENOME266751_6_16954	14379	Unassigned		Methanobacteriota	Methanobacteria	Methanobacteriales	Methanobacteriaceae	Methanobrevibacter_A	Methanobrevibacter_A smithii	Outlier	No	NA	Low-quality	34.59	0	Austria	0.0236345	No
Feng_Q_2015_NC_ERR688618.NODE_109_124524	ERR688624.NODE_1318_21	124524	Duplodnaviria;Heunggongvirae;Uroviricota;Caudoviricetes;Caudovirales;Myoviridae	VOGdb markers	Methanobacteriota	Methanobacteria	Methanobacteriales	Methanobacteriaceae	Methanobrevibacter_A	Methanobrevibacter_A smithii	VC_328_0	No	NA	Not-determined	NA	0	Austria	0.022584	No
Feng_Q_2015_NC_ERR688618.NODE_12_352307	GUT_GENOME261695_15_32706	352307	Duplodnaviria;Heunggongvirae;Uroviricota;Caudoviricetes;Caudovirales	VOGdb markers	Methanobacteriota	Methanobacteria	Methanobacteriales	Methanobacteriaceae	Methanobrevibacter_A	Methanobrevibacter_A smithii	VC_329_0	No	NA	Not-determined	NA	0	Austria	0.00052521	No
Feng_Q_2015_NC_ERR688618.NODE_213_86366	GUT_GENOME279910_4_62128	86366	Unassigned		Methanobacteriota	Methanobacteria	Methanobacteriales	Methanobacteriaceae	Methanobrevibacter_A	Methanobrevibacter_A smithii	VC_332_1	No	NA	Not-determined	NA	0	Austria	0.0252101	No
Feng_Q_2015_NC_ERR688618.NODE_3_536695	GUT_GENOME258086_2_60997	536695	Duplodnaviria;Heunggongvirae;Uroviricota;Caudoviricetes;Caudovirales	VOGdb markers	Methanobacteriota	Methanobacteria	Methanobacteriales	Methanobacteriaceae	Methanobrevibacter_A	Methanobrevibacter_A smithii	Overlap (VC_357/VC_358)	No	NA	Not-determined	NA	0	Austria	0.00052521	Yes
Feng_Q_2015_NC_ERR688618.NODE_5_518151	GUT_GENOME194277_1_110295	518151	Unassigned		Methanobacteriota	Methanobacteria	Methanobacteriales	Methanobacteriaceae	Methanobrevibacter_A	Methanobrevibacter_A smithii	VC_331_8	No	NA	Not-determined	NA	0	Austria	0.120273	Yes
Feng_Q_2015_NC_ERR688623.NODE_1166_21077	GUT_GENOME046615_7_62108	21077	Unassigned		Methanobacteriota	Methanobacteria	Methanobacteriales	Methanobacteriaceae	Methanobrevibacter_A	Methanobrevibacter_A smithii	Outlier	No	NA	Not-determined	NA	0	Austria	0.0451681	No
Feng_Q_2015_NC_ERR688623.NODE_137_87382	GUT_GENOME066320_3_57785	87382	Duplodnaviria;Heunggongvirae;Uroviricota;Caudoviricetes;Caudovirales	VOGdb markers	Methanobacteriota	Methanobacteria	Methanobacteriales	Methanobacteriaceae	Methanobrevibacter_A	Methanobrevibacter_A smithii_A	VC_357_2	No	NA	Not-determined	NA	0	Austria	0.00210084	Yes
Feng_Q_2015_NC_ERR688623.NODE_24764_1325	GUT_GENOME066320_3_57123	1325	Unassigned		Methanobacteriota	Methanobacteria	Methanobacteriales	Methanobacteriaceae	Methanobrevibacter_A	Methanobrevibacter_A smithii_A	Outlier	No	NA	Low-quality	3.37	0	Austria	0.00262605	Yes
Feng_Q_2015_NC_ERR688623.NODE_299_56604	GUT_GENOME107745_54_7356	56604	Unassigned		Methanobacteriota	Methanobacteria	Methanobacteriales	Methanobacteriaceae	Methanobrevibacter_A	Methanobrevibacter_A smithii	Outlier	No	NA	Not-determined	NA	0	Austria	0.00105042	No
Feng_Q_2015_NC_ERR688623.NODE_5272_5330	SRR9655023.NODE_25_219	5330	Unassigned		Methanobacteriota	Methanobacteria	Methanobacteriales	Methanobacteriaceae	Methanobrevibacter_A	Methanobrevibacter_A smithii	Outlier	No	NA	Low-quality	13.29	0	Austria	0.0178571	Yes
Feng_Q_2015_NC_ERR688623.NODE_854_27571	GUT_GENOME066320_3_57639	27571	Unassigned		Methanobacteriota	Methanobacteria	Methanobacteriales	Methanobacteriaceae	Methanobrevibacter_A	Methanobrevibacter_A smithii_A	Outlier	No	NA	Not-determined	NA	0	Austria	0.00052521	No
Feng_Q_2015_NC_ERR688624.NODE_117_99870	GUT_GENOME143185_16_1306	99870	Unassigned		Methanobacteriota	Methanobacteria	Methanobacteriales	Methanobacteriaceae	Methanobrevibacter_A	Methanobrevibacter_A smithii_A	Outlier	No	NA	Not-determined	NA	0	Austria	0.029937	No
Feng_Q_2015_NC_ERR688624.NODE_13_239271	GUT_GENOME258086_2_60997	239271	Unassigned		Methanobacteriota	Methanobacteria	Methanobacteriales	Methanobacteriaceae	Methanobrevibacter_A	Methanobrevibacter_A smithii	VC_356_4	No	NA	Not-determined	NA	0	Austria	0.00052521	No
Feng_Q_2015_NC_ERR688624.NODE_154_87382	ERR688624.NODE_1318_21	87382	Duplodnaviria;Heunggongvirae;Uroviricota;Caudoviricetes;Caudovirales;Myoviridae	VOGdb markers	Methanobacteriota	Methanobacteria	Methanobacteriales	Methanobacteriaceae	Methanobrevibacter_A	Methanobrevibacter_A smithii	VC_328_0	No	NA	Not-determined	NA	0	Austria	0.0483193	No
Feng_Q_2015_NC_ERR688624.NODE_176_83618	ERR688593.NODE_1068_20580	83618	Unassigned		Methanobacteriota	Methanobacteria	Methanobacteriales	Methanobacteriaceae	Methanobrevibacter_A	Methanobrevibacter_A smithii_A	VC_333_0	No	NA	Not-determined	NA	0	Austria	0.00157563	No
Feng_Q_2015_NC_ERR688624.NODE_178_82922	GUT_GENOME279910_4_62128	82922	Unassigned		Methanobacteriota	Methanobacteria	Methanobacteriales	Methanobacteriaceae	Methanobrevibacter_A	Methanobrevibacter_A smithii	VC_332_1	No	NA	Not-determined	NA	0	Austria	0.032563	No
Feng_Q_2015_NC_ERR688624.NODE_247_68574	GUT_GENOME282742_6_115569	68574	Unassigned		Methanobacteriota	Methanobacteria	Methanobacteriales	Methanobacteriaceae	Methanobrevibacter_A	Methanobrevibacter_A smithii	Outlier	No	NA	Not-determined	NA	0	Austria	0.0162815	No
Feng_Q_2015_NC_ERR688624.NODE_418_49055	GUT_GENOME194277_1_110295	49055	Unassigned		Methanobacteriota	Methanobacteria	Methanobacteriales	Methanobacteriaceae	Methanobrevibacter_A	Methanobrevibacter_A smithii	Outlier	No	NA	Not-determined	NA	0	Austria	0.0231092	No
Feng_Q_2015_NC_ERR688626.NODE_21_215262	GUT_GENOME279910_4_62128	215262	Unassigned		Methanobacteriota	Methanobacteria	Methanobacteriales	Methanobacteriaceae	Methanobrevibacter_A	Methanobrevibacter_A smithii	VC_332_0	No	NA	Not-determined	NA	0	Austria	0.0383403	No
Feng_Q_2015_NC_ERR688626.NODE_24_209135	GUT_GENOME284634_22_10926	209135	Duplodnaviria;Heunggongvirae;Uroviricota;Caudoviricetes;Caudovirales	VOGdb markers	Methanobacteriota	Methanobacteria	Methanobacteriales	Methanobacteriaceae	Methanobrevibacter_A	Methanobrevibacter_A smithii	VC_357_4	No	NA	Not-determined	NA	0	Austria	0.0131303	Yes
Feng_Q_2015_NC_ERR688626.NODE_299_57664	ERR688593.NODE_1068_20580	57664	Unassigned		Methanobacteriota	Methanobacteria	Methanobacteriales	Methanobacteriaceae	Methanobrevibacter_A	Methanobrevibacter_A smithii_A	Outlier	No	NA	Not-determined	NA	0	Austria	0	No
Feng_Q_2015_NC_ERR688626.NODE_314_55127	GUT_GENOME018608_1_39351	55127	Unassigned		Methanobacteriota	Methanobacteria	Methanobacteriales	Methanobacteriaceae	Methanobrevibacter_A	Methanobrevibacter_A smithii	Outlier	No	NA	Not-determined	NA	0	Austria	0.00105042	No
Feng_Q_2015_NC_ERR688626.NODE_44_153581	GUT_GENOME018608_1_36299	153581	Unassigned		Methanobacteriota	Methanobacteria	Methanobacteriales	Methanobacteriaceae	Methanobrevibacter_A	Methanobrevibacter_A smithii	VC_331_2	No	NA	Not-determined	NA	0	Austria	0.00052521	No
Feng_Q_2015_NC_ERR688626.NODE_50_139189	GUT_GENOME269219_18_19236	139189	Unassigned		Methanobacteriota	Methanobacteria	Methanobacteriales	Methanobacteriaceae	Methanobrevibacter_A	Methanobrevibacter_A smithii	VC_331_11	No	NA	Not-determined	NA	0	Austria	0.00577731	No
Feng_Q_2015_NC_ERR688626.NODE_516_39242	GUT_GENOME230857_21_43860	39242	Unassigned		Methanobacteriota	Methanobacteria	Methanobacteriales	Methanobacteriaceae	Methanobrevibacter_A	Methanobrevibacter_A smithii	Outlier	No	NA	Low-quality	22.17	0	Austria	0.0241597	No
Feng_Q_2015_NC_ERR688626.NODE_75_119800	GUT_GENOME143185_12_220085	119800	Unassigned		Methanobacteriota	Methanobacteria	Methanobacteriales	Methanobacteriaceae	Methanobrevibacter_A	Methanobrevibacter_A smithii_A	VC_334_1	No	NA	Not-determined	NA	0	Austria	0.0330882	Yes
Feng_Q_2015_NC_ERR688627.NODE_510_33615	GUT_GENOME018608_1_39351	33615	Unassigned		Methanobacteriota	Methanobacteria	Methanobacteriales	Methanobacteriaceae	Methanobrevibacter_A	Methanobrevibacter_A smithii	Outlier	No	NA	Not-determined	NA	0	Austria	0.00157563	No
Feng_Q_2015_NC_ERR688632.NODE_10_226415	GUT_GENOME194277_1_111100	226415	Unassigned		Methanobacteriota	Methanobacteria	Methanobacteriales	Methanobacteriaceae	Methanobrevibacter_A	Methanobrevibacter_A smithii	VC_331_13	No	NA	Not-determined	NA	0	Austria	0.022584	No
Feng_Q_2015_NC_ERR688632.NODE_22_179180	GUT_GENOME143185_12_220085	179180	Unassigned		Methanobacteriota	Methanobacteria	Methanobacteriales	Methanobacteriaceae	Methanobrevibacter_A	Methanobrevibacter_A smithii_A	VC_334_1	No	NA	High-quality	100	0	Austria	0.0388655	Yes
Feng_Q_2015_NC_ERR688632.NODE_253_55532	GUT_GENOME194277_1_110295	55532	Unassigned		Methanobacteriota	Methanobacteria	Methanobacteriales	Methanobacteriaceae	Methanobrevibacter_A	Methanobrevibacter_A smithii	Outlier	No	NA	Not-determined	NA	0	Austria	0.0189076	No
Feng_Q_2015_NC_ERR688632.NODE_28_165749	GUT_GENOME268434_7_1368	165749	Unassigned		Methanobacteriota	Methanobacteria	Methanobacteriales	Methanobacteriaceae	Methanobrevibacter_A	Methanobrevibacter_A smithii	Overlap (VC_333/VC_334)	No	NA	Not-determined	NA	0	Austria	0.0183824	No
Feng_Q_2015_NC_ERR688632.NODE_56_124711	GUT_GENOME253955_2_249842	124711	Duplodnaviria;Heunggongvirae;Uroviricota;Caudoviricetes;Caudovirales;Myoviridae	VOGdb markers	Methanobacteriota	Methanobacteria	Methanobacteriales	Methanobacteriaceae	Methanobrevibacter_A	Methanobrevibacter_A smithii	VC_328_0	No	NA	Not-determined	NA	0	Austria	0.0157563	No
Feng_Q_2015_NC_ERR688633.NODE_114400_553	GUT_GENOME046615_8_26673	553	Unassigned		Methanobacteriota	Methanobacteria	Methanobacteriales	Methanobacteriaceae	Methanobrevibacter_A	Methanobrevibacter_A smithii	Singleton	No	NA	Not-determined	NA	0	Austria	0.00052521	No
Feng_Q_2015_NC_ERR688633.NODE_46745_1206	GUT_GENOME093033_16_26421	1206	Unassigned		Methanobacteriota	Methanobacteria	Methanobacteriales	Methanobacteriaceae	Methanobrevibacter_A	Methanobrevibacter_A smithii_A	Outlier	No	NA	Low-quality	2.21	0	Austria	0.00315126	Yes
Feng_Q_2015_NC_ERR688633.NODE_6396_6798	GUT_GENOME107745_54_7356	6798	Unassigned		Methanobacteriota	Methanobacteria	Methanobacteriales	Methanobacteriaceae	Methanobrevibacter_A	Methanobrevibacter_A smithii	Outlier	No	NA	Not-determined	NA	0	Austria	0.0304622	No
Feng_Q_2015_NC_ERR688633.NODE_6706_6515	GUT_GENOME061502_2_5078	6515	Unassigned		Methanobacteriota	Methanobacteria	Methanobacteriales	Methanobacteriaceae	Methanobrevibacter_A	Methanobrevibacter_A smithii_A	VC_379_0	No	NA	Low-quality	11.98	0	Austria	0.00052521	Yes
Feng_Q_2015_NC_ERR688635.NODE_1680_19747	GUT_GENOME018608_1_39351	19747	Unassigned		Methanobacteriota	Methanobacteria	Methanobacteriales	Methanobacteriaceae	Methanobrevibacter_A	Methanobrevibacter_A smithii	Outlier	No	NA	Not-determined	NA	0	Austria	0.00052521	No
Feng_Q_2015_NC_ERR688635.NODE_2103_16787	GUT_GENOME135949_10_18798	16787	Unassigned		Methanobacteriota	Methanobacteria	Methanobacteriales	Methanobacteriaceae	Methanobrevibacter_A	Methanobrevibacter_A smithii	VC_363_0	No	NA	Low-quality	2.65	0	Austria	0	No
Feng_Q_2015_NC_ERR688639.NODE_155594_295	CCIS06260551ST-3-0.NODE_518_2754	295	Unassigned		Methanobacteriota	Methanobacteria	Methanobacteriales	Methanobacteriaceae	Methanobrevibacter_A	Methanobrevibacter_A smithii	Singleton	No	NA	Not-determined	NA	0	Austria	0.00052521	No
Feng_Q_2015_NC_ERR688639.NODE_59877_781	GUT_GENOME269311_7_90078	781	Duplodnaviria;Heunggongvirae;Uroviricota;Caudoviricetes;Caudovirales	Eggnog markers	Methanobacteriota	Methanobacteria	Methanobacteriales	Methanobacteriaceae	Methanobrevibacter_A	Methanobrevibacter_A smithii	Singleton	No	NA	Not-determined	NA	0	Austria	0.00210084	No
Feng_Q_2015_NC_ERR688642.NODE_140_129000	GUT_GENOME269219_18_19236	129000	Unassigned		Methanobacteriota	Methanobacteria	Methanobacteriales	Methanobacteriaceae	Methanobrevibacter_A	Methanobrevibacter_A smithii	VC_331_11	No	NA	Not-determined	NA	0	Austria	0.0493697	No
Feng_Q_2015_NC_ERR688642.NODE_244_91493	GUT_GENOME247414_2_5385	91493	Duplodnaviria;Heunggongvirae;Uroviricota;Caudoviricetes;Caudovirales	VOGdb markers	Methanobacteriota	Methanobacteria	Methanobacteriales	Methanobacteriaceae	Methanobrevibacter_A	Methanobrevibacter_A smithii	VC_357_5	No	NA	Not-determined	NA	0	Austria	0.0215336	Yes
Feng_Q_2015_NC_ERR688642.NODE_262_85734	GUT_GENOME279910_4_62128	85734	Unassigned		Methanobacteriota	Methanobacteria	Methanobacteriales	Methanobacteriaceae	Methanobrevibacter_A	Methanobrevibacter_A smithii	VC_332_1	No	NA	Not-determined	NA	0	Austria	0.00735294	No
Feng_Q_2015_NC_ERR688642.NODE_263_85708	GUT_GENOME066320_3_57785	85708	Duplodnaviria;Heunggongvirae;Uroviricota;Caudoviricetes;Caudovirales	VOGdb markers	Methanobacteriota	Methanobacteria	Methanobacteriales	Methanobacteriaceae	Methanobrevibacter_A	Methanobrevibacter_A smithii_A	VC_357_2	No	NA	Not-determined	NA	0	Austria	0.0231092	No
Feng_Q_2015_NC_ERR688642.NODE_400_63779	GUT_GENOME018608_1_39351	63779	Unassigned		Methanobacteriota	Methanobacteria	Methanobacteriales	Methanobacteriaceae	Methanobrevibacter_A	Methanobrevibacter_A smithii	Outlier	No	NA	Not-determined	NA	0	Austria	0.00157563	No
Feng_Q_2015_NC_ERR688642.NODE_484_54330	GUT_GENOME194277_1_110295	54330	Unassigned		Methanobacteriota	Methanobacteria	Methanobacteriales	Methanobacteriaceae	Methanobrevibacter_A	Methanobrevibacter_A smithii	Outlier	No	NA	Not-determined	NA	0	Austria	0.00052521	No
Feng_Q_2015_NC_ERR688642.NODE_74_174533	GUT_GENOME284192_60_6919	174533	Duplodnaviria;Heunggongvirae;Uroviricota;Caudoviricetes;Caudovirales	VOGdb markers	Methanobacteriota	Methanobacteria	Methanobacteriales	Methanobacteriaceae	Methanobrevibacter_A	Methanobrevibacter_A smithii_A	VC_329_6	No	NA	Not-determined	NA	0	Austria	0.0141807	No
Feng_Q_2015_NC_ERR688642.NODE_93_154348	CCIS50471204ST-4-0.NODE_1624_24832	154348	Unassigned		Methanobacteriota	Methanobacteria	Methanobacteriales	Methanobacteriaceae	Methanobrevibacter_A	Methanobrevibacter_A smithii_A	VC_356_3	No	NA	Not-determined	NA	0	Austria	0.00052521	No
Feng_Q_2015_NC_ERR688644.NODE_352_35411	GUT_GENOME246782_8_59663	35411	Unassigned		Methanobacteriota	Methanobacteria	Methanobacteriales	Methanobacteriaceae	Methanobrevibacter_A	Methanobrevibacter_A smithii	Outlier	No	NA	Not-determined	NA	0	Austria	0.0115546	No
Feng_Q_2015_NC_ERR710424.NODE_224_72588	GUT_GENOME107745_54_7356	72588	Unassigned		Methanobacteriota	Methanobacteria	Methanobacteriales	Methanobacteriaceae	Methanobrevibacter_A	Methanobrevibacter_A smithii	VC_331_3	No	NA	Not-determined	NA	0	Austria	0	No
Feng_Q_2015_NC_ERR710424.NODE_25_230116	GUT_GENOME066320_3_57785	230116	Duplodnaviria;Heunggongvirae;Uroviricota;Caudoviricetes;Caudovirales	VOGdb markers	Methanobacteriota	Methanobacteria	Methanobacteriales	Methanobacteriaceae	Methanobrevibacter_A	Methanobrevibacter_A smithii_A	VC_357_6	No	NA	Not-determined	NA	0	Austria	0.0351891	Yes
Feng_Q_2015_NC_ERR710424.NODE_311_59590	GUT_GENOME018608_1_39351	59590	Unassigned		Methanobacteriota	Methanobacteria	Methanobacteriales	Methanobacteriaceae	Methanobrevibacter_A	Methanobrevibacter_A smithii	Outlier	No	NA	Not-determined	NA	0	Austria	0.0105042	No
Feng_Q_2015_NC_ERR710424.NODE_385_50732	GUT_GENOME269219_18_19456	50732	Unassigned		Methanobacteriota	Methanobacteria	Methanobacteriales	Methanobacteriaceae	Methanobrevibacter_A	Methanobrevibacter_A smithii	Outlier	No	NA	Low-quality	31.27	0	Austria	0.00052521	No
Feng_Q_2015_NC_ERR710424.NODE_46_178335	GUT_GENOME143185_12_220085	178335	Duplodnaviria;Heunggongvirae;Uroviricota;Caudoviricetes;Caudovirales	VOGdb markers	Methanobacteriota	Methanobacteria	Methanobacteriales	Methanobacteriaceae	Methanobrevibacter_A	Methanobrevibacter_A smithii_A	Overlap (VC_329/VC_335)	No	NA	Not-determined	NA	0	Austria	0.00630252	Yes
Feng_Q_2015_NC_ERR710429.NODE_1634_15065	GUT_GENOME263468_1_482597	15065	Unassigned		Methanobacteriota	Methanobacteria	Methanobacteriales	Methanobacteriaceae	Methanobrevibacter_A	Methanobrevibacter_A woesei	VC_374_0	No	NA	Not-determined	NA	0	Austria	0.0372899	No
Feng_Q_2015_NC_ERR710429.NODE_2374_11030	GUT_GENOME283665_166_2892	11030	Unassigned		Methanobacteriota	Methanobacteria	Methanobacteriales	Methanobacteriaceae	Methanobrevibacter_A	Methanobrevibacter_A smithii	Singleton	No	NA	Not-determined	NA	0	Austria	0.00105042	No
Feng_Q_2015_NC_ERR710432.NODE_318_59390	GUT_GENOME259830_2_112204	59390	Unassigned		Methanobacteriota	Methanobacteria	Methanobacteriales	Methanobacteriaceae	Methanobrevibacter_A	Methanobrevibacter_A smithii	Outlier	No	NA	Not-determined	NA	0	Austria	0.00105042	No
Feng_Q_2015_NC_ERR710432.NODE_47_178432	GUT_GENOME143185_12_220085	178432	Unassigned		Methanobacteriota	Methanobacteria	Methanobacteriales	Methanobacteriaceae	Methanobrevibacter_A	Methanobrevibacter_A smithii_A	VC_334_1	No	NA	Not-determined	NA	0	Austria	0.0189076	Yes
Feng_Q_2015_NC_ERR710432.NODE_62_151820	ERR688624.NODE_1318_21	151820	Duplodnaviria;Heunggongvirae;Uroviricota;Caudoviricetes;Caudovirales;Myoviridae	VOGdb markers	Methanobacteriota	Methanobacteria	Methanobacteriales	Methanobacteriaceae	Methanobrevibacter_A	Methanobrevibacter_A smithii	VC_328_2	No	NA	Not-determined	NA	0	Austria	0.00052521	No
Feng_Q_2015_NC_ERR710432.NODE_9_302670	GUT_GENOME246782_8_59663	302670	Unassigned		Methanobacteriota	Methanobacteria	Methanobacteriales	Methanobacteriaceae	Methanobrevibacter_A	Methanobrevibacter_A smithii	VC_331_14	No	NA	Not-determined	NA	0	Austria	0.0246849	No
GPD|uvig_105786	GUT_GENOME273866_45_728	13557	Unassigned		Methanobacteriota	Methanobacteria	Methanobacteriales	Methanobacteriaceae	Methanobrevibacter_A	Methanobrevibacter_A smithii	Outlier	No	NA	Low-quality	35.48	0	Australia	0.0147059	Yes
GPD|uvig_124530	GUT_GENOME094374_1_67759	17566	Unassigned		Methanobacteriota	Methanobacteria	Methanobacteriales	Methanobacteriaceae	Methanobrevibacter_A	Methanobrevibacter_A smithii	Outlier	No	NA	Low-quality	46.07	0	China	0.00210084	Yes
GPD|uvig_137293	GUT_GENOME093513_2_107737	51014	Duplodnaviria;Heunggongvirae;Uroviricota;Caudoviricetes;Caudovirales	Viral database	Methanobacteriota	Methanobacteria	Methanobacteriales	Methanobacteriaceae	Methanobrevibacter_A	Methanobrevibacter_A smithii	VC_359_0	No	NA	High-quality	93.62	0	China	0.012605	Yes
GPD|uvig_145864	GUT_GENOME235230_27_63636	37687	Duplodnaviria;Heunggongvirae;Uroviricota;Caudoviricetes;Caudovirales	Viral database	Methanobacteriota	Methanobacteria	Methanobacteriales	Methanobacteriaceae	Methanobrevibacter_A	Methanobrevibacter_A smithii	VC_324_0	No	NA	High-quality	98.98	0	China	0.00367647	Yes
GPD|uvig_147901	GUT_GENOME218694_90_4917	52188	Duplodnaviria;Heunggongvirae;Uroviricota;Caudoviricetes;Caudovirales	Viral database	Methanobacteriota	Methanobacteria	Methanobacteriales	Methanobacteriaceae	Methanobrevibacter_A	Methanobrevibacter_A smithii	VC_323_0	No	NA	High-quality	100	0	United Kingdom,Sweden,Sweden	0.00367647	Yes
GPD|uvig_148987	GUT_GENOME266751_6_17485	18190	Duplodnaviria;Heunggongvirae;Uroviricota;Caudoviricetes;Caudovirales;Siphoviridae	Viral database	Methanobacteriota	Methanobacteria	Methanobacteriales	Methanobacteriaceae	Methanobrevibacter_A	Methanobrevibacter_A smithii	VC_383_0	No	NA	Low-quality	34.19	0	Sweden	0.00052521	Yes
GPD|uvig_156887	GUT_GENOME268814_20_603	39312	Duplodnaviria;Heunggongvirae;Uroviricota;Caudoviricetes;Caudovirales	Viral database	Methanobacteriota	Methanobacteria	Methanobacteriales	Methanobacteriaceae	Methanobrevibacter_A	Methanobrevibacter_A smithii	VC_324_0	No	NA	High-quality	100	0	Sweden	0	Yes
GPD|uvig_163399	GUT_GENOME265776_7_73441	10870	Duplodnaviria;Heunggongvirae;Uroviricota;Caudoviricetes;Caudovirales;Siphoviridae	Viral database	Methanobacteriota	Methanobacteria	Methanobacteriales	Methanobacteriaceae	Methanobrevibacter_A	Methanobrevibacter_A smithii	VC_326_0	No	NA	Low-quality	27.41	0	Austria	0	Yes
GPD|uvig_163681	GUT_GENOME259830_12_62046	37984	Duplodnaviria;Heunggongvirae;Uroviricota;Caudoviricetes;Caudovirales	Viral database	Methanobacteriota	Methanobacteria	Methanobacteriales	Methanobacteriaceae	Methanobrevibacter_A	Methanobrevibacter_A smithii	VC_324_0	No	NA	High-quality	99.74	0	United States,United States,United States,United States,Austria,United States,Austria,United States	0.00105042	Yes
GPD|uvig_16383	GUT_GENOME273866_45_728	13493	Unassigned		Methanobacteriota	Methanobacteria	Methanobacteriales	Methanobacteriaceae	Methanobrevibacter_A	Methanobrevibacter_A smithii	Outlier	No	NA	Low-quality	35.4	0	Spain,Spain	0.00052521	Yes
GPD|uvig_174040	GUT_GENOME230857_21_44924	55887	Duplodnaviria;Heunggongvirae;Uroviricota;Caudoviricetes;Caudovirales	Viral database	Methanobacteriota	Methanobacteria	Methanobacteriales	Methanobacteriaceae	Methanobrevibacter_A	Methanobrevibacter_A smithii	VC_359_0	No	NA	High-quality	100	0	Austria	0.00052521	Yes
GPD|uvig_177382	GUT_GENOME273866_45_728	36323	Duplodnaviria;Heunggongvirae;Uroviricota;Caudoviricetes;Caudovirales	Viral database	Methanobacteriota	Methanobacteria	Methanobacteriales	Methanobacteriaceae	Methanobrevibacter_A	Methanobrevibacter_A smithii	VC_324_0	No	NA	High-quality	95.35	0	United Kingdom	0.0210084	Yes
GPD|uvig_178408	GUT_GENOME239133_175_27290	52764	Duplodnaviria;Heunggongvirae;Uroviricota;Caudoviricetes;Caudovirales	Viral database	Methanobacteriota	Methanobacteria	Methanobacteriales	Methanobacteriaceae	Methanobrevibacter_A	Methanobrevibacter_A smithii_A	VC_358_0	No	NA	Complete	100	0	United Kingdom	0.00210084	Yes
GPD|uvig_178441	GUT_GENOME268814_20_603	35575	Duplodnaviria;Heunggongvirae;Uroviricota;Caudoviricetes;Caudovirales	Viral database	Methanobacteriota	Methanobacteria	Methanobacteriales	Methanobacteriaceae	Methanobrevibacter_A	Methanobrevibacter_A smithii	VC_324_0	No	NA	High-quality	93.42	0	United Kingdom	0.00840336	Yes
GPD|uvig_183331	ERR710432.NODE_943_6498	39649	Duplodnaviria;Heunggongvirae;Uroviricota;Caudoviricetes;Caudovirales;Siphoviridae	Viral database	Methanobacteriota	Methanobacteria	Methanobacteriales	Methanobacteriaceae	Methanobrevibacter	Methanobrevibacter olleyae	VC_326_0	No	NA	Complete	100	0	United Kingdom	0.00052521	Yes
GPD|uvig_185017	GUT_GENOME273866_45_728	42229	Duplodnaviria;Heunggongvirae;Uroviricota;Caudoviricetes;Caudovirales	Eggnog markers	Methanobacteriota	Methanobacteria	Methanobacteriales	Methanobacteriaceae	Methanobrevibacter_A	Methanobrevibacter_A smithii	Outlier	No	NA	High-quality	100	0	China,United Kingdom,Ethiopia	0.00210084	Yes
GPD|uvig_185256	GUT_GENOME259830_12_64092	54986	Duplodnaviria;Heunggongvirae;Uroviricota;Caudoviricetes;Caudovirales	Viral database	Methanobacteriota	Methanobacteria	Methanobacteriales	Methanobacteriaceae	Methanobrevibacter_A	Methanobrevibacter_A smithii	VC_370_0	No	NA	High-quality	95.29	0	United Kingdom,Madagascar	0	Yes
GPD|uvig_191218	GUT_GENOME259830_12_62046	11645	Unassigned		Methanobacteriota	Methanobacteria	Methanobacteriales	Methanobacteriaceae	Methanobrevibacter_A	Methanobrevibacter_A smithii	Outlier	No	NA	Low-quality	30.55	0	United Kingdom	0.00052521	Yes
GPD|uvig_195409	GUT_GENOME218694_90_4917	25869	Duplodnaviria;Heunggongvirae;Uroviricota;Caudoviricetes;Caudovirales	Viral database	Methanobacteriota	Methanobacteria	Methanobacteriales	Methanobacteriaceae	Methanobrevibacter_A	Methanobrevibacter_A smithii	VC_323_0	No	NA	Medium-quality	63.46	0	United Kingdom,United States	0.022584	Yes
GPD|uvig_196446	GUT_GENOME235230_27_63636	34215	Duplodnaviria;Heunggongvirae;Uroviricota;Caudoviricetes;Caudovirales	Viral database	Methanobacteriota	Methanobacteria	Methanobacteriales	Methanobacteriaceae	Methanobrevibacter_A	Methanobrevibacter_A smithii	VC_324_0	No	NA	Medium-quality	89.89	0	United Kingdom	0.00210084	Yes
GPD|uvig_204047	CCIS38765456ST-20-0.NODE_125_97436	40733	Duplodnaviria;Heunggongvirae;Uroviricota;Caudoviricetes;Caudovirales	Viral database	Methanobacteriota	Methanobacteria	Methanobacteriales	Methanobacteriaceae	Methanobrevibacter_A	Methanobrevibacter_A smithii	VC_324_0	No	NA	High-quality	100	0	United Kingdom	0.0273109	Yes
GPD|uvig_204276	GUT_GENOME284001_2_69654	65823	Duplodnaviria;Heunggongvirae;Uroviricota;Caudoviricetes;Caudovirales	Viral database	Methanobacteriota	Methanobacteria	Methanobacteriales	Methanobacteriaceae	Methanobrevibacter_A	Methanobrevibacter_A smithii	VC_370_0	No	NA	High-quality	100	0	United Kingdom	0.0183824	Yes
GPD|uvig_204331	GUT_GENOME215821_25_288527	12202	Duplodnaviria;Heunggongvirae;Uroviricota;Caudoviricetes;Caudovirales;Podoviridae	Viral database	Thermoplasmatota	Thermoplasmata	Methanomassiliicoccales	Methanomassiliicoccaceae	Methanomassiliicoccus	Methanomassiliicoccus intestinalis	VC_395_0	No	NA	Low-quality	40.62	0	United States,United States,United States,Denmark,United Kingdom,United States,United States,United Kingdom	0.0131303	Yes
GPD|uvig_206389	GUT_GENOME273866_45_728	10767	Unassigned		Methanobacteriota	Methanobacteria	Methanobacteriales	Methanobacteriaceae	Methanobrevibacter_A	Methanobrevibacter_A smithii	Outlier	No	NA	Low-quality	28.29	0	United Kingdom	0.0252101	Yes
GPD|uvig_208836	CCIS38765456ST-20-0.NODE_125_97436	12137	Unassigned		Methanobacteriota	Methanobacteria	Methanobacteriales	Methanobacteriaceae	Methanobrevibacter_A	Methanobrevibacter_A smithii	Outlier	No	NA	Low-quality	31.87	0	United Kingdom	0.032563	Yes
GPD|uvig_209938	CCIS38765456ST-20-0.NODE_125_97436	16915	Duplodnaviria;Heunggongvirae;Uroviricota;Caudoviricetes;Caudovirales	Eggnog markers	Methanobacteriota	Methanobacteria	Methanobacteriales	Methanobacteriaceae	Methanobrevibacter_A	Methanobrevibacter_A smithii	Outlier	No	NA	Low-quality	44.41	0	United Kingdom	0.00262605	Yes
GPD|uvig_220840	GUT_GENOME273866_45_728	36401	Duplodnaviria;Heunggongvirae;Uroviricota;Caudoviricetes;Caudovirales	Viral database	Methanobacteriota	Methanobacteria	Methanobacteriales	Methanobacteriaceae	Methanobrevibacter_A	Methanobrevibacter_A smithii	VC_324_0	No	NA	High-quality	95.65	0	China	0.019958	Yes
GPD|uvig_245464	GUT_GENOME266751_6_17485	53569	Duplodnaviria;Heunggongvirae;Uroviricota;Caudoviricetes;Caudovirales	Viral database	Methanobacteriota	Methanobacteria	Methanobacteriales	Methanobacteriaceae	Methanobrevibacter_A	Methanobrevibacter_A smithii	VC_323_0	No	NA	High-quality	100	0	China	0.012605	Yes
GPD|uvig_259726	ERR710432.NODE_943_6498	28544	Duplodnaviria;Heunggongvirae;Uroviricota;Caudoviricetes;Caudovirales;Siphoviridae	Viral database	Methanobacteriota	Methanobacteria	Methanobacteriales	Methanobacteriaceae	Methanobrevibacter	Methanobrevibacter olleyae	VC_326_0	No	NA	Medium-quality	72.23	0	Netherlands	0.00840336	Yes
GPD|uvig_281916	CCIS38765456ST-20-0.NODE_125_97436	37520	Duplodnaviria;Heunggongvirae;Uroviricota;Caudoviricetes;Caudovirales	Viral database	Methanobacteriota	Methanobacteria	Methanobacteriales	Methanobacteriaceae	Methanobrevibacter_A	Methanobrevibacter_A smithii	VC_324_0	No	NA	Complete	100	0	Denmark	0.00997899	Yes
GPD|uvig_299364	GUT_GENOME273866_45_728	10097	Duplodnaviria;Heunggongvirae;Uroviricota;Caudoviricetes;Caudovirales	Eggnog markers	Methanobacteriota	Methanobacteria	Methanobacteriales	Methanobacteriaceae	Methanobrevibacter_A	Methanobrevibacter_A smithii	Outlier	No	NA	Low-quality	26.51	0	Germany	0.00105042	Yes
GPD|uvig_305526	GUT_GENOME093679_1_86251	94861	Unassigned		Methanobacteriota	Methanobacteria	Methanobacteriales	Methanobacteriaceae	Methanobrevibacter_A	Methanobrevibacter_A smithii	VC_389_0	No	NA	Medium-quality	72.75	0	Germany,Germany,Netherlands,Germany,Germany,Germany,United States	0.0052521	Yes
GPD|uvig_330919	GUT_GENOME194462_7_70021	34808	Duplodnaviria;Heunggongvirae;Uroviricota;Caudoviricetes;Caudovirales	Viral database	Methanobacteriota	Methanobacteria	Methanobacteriales	Methanobacteriaceae	Methanobrevibacter_A	Methanobrevibacter_A smithii	VC_358_0	No	NA	Medium-quality	65.43	0	China	0.0346639	Yes
GPD|uvig_333147	GUT_GENOME284001_2_69654	51008	Duplodnaviria;Heunggongvirae;Uroviricota;Caudoviricetes;Caudovirales	Viral database	Methanobacteriota	Methanobacteria	Methanobacteriales	Methanobacteriaceae	Methanobrevibacter_A	Methanobrevibacter_A smithii	VC_370_0	No	NA	Medium-quality	88.4	0	NA,Madagascar	0.0273109	Yes
GPD|uvig_338096	GUT_GENOME273866_45_728	46208	Duplodnaviria;Heunggongvirae;Uroviricota;Caudoviricetes;Caudovirales	Viral database	Methanobacteriota	Methanobacteria	Methanobacteriales	Methanobacteriaceae	Methanobrevibacter_A	Methanobrevibacter_A smithii	VC_323_0	No	NA	High-quality	100	0	Sweden	0.00157563	Yes
GPD|uvig_338375	GUT_GENOME268740_5_138438	17597	Duplodnaviria;Heunggongvirae;Uroviricota;Caudoviricetes;Caudovirales	Viral database	Methanobacteriota	Methanobacteria	Methanobacteriales	Methanobacteriaceae	Methanobrevibacter_A	Methanobrevibacter_A smithii	VC_324_0	No	NA	Low-quality	46.23	0	Sweden	0.00157563	Yes
GPD|uvig_351915	GUT_GENOME230857_21_44924	53944	Duplodnaviria;Heunggongvirae;Uroviricota;Caudoviricetes;Caudovirales	Viral database	Methanobacteriota	Methanobacteria	Methanobacteriales	Methanobacteriaceae	Methanobrevibacter_A	Methanobrevibacter_A smithii	VC_359_0	No	NA	High-quality	99.04	0	Fiji	0.0467437	Yes
GPD|uvig_355152	GUT_GENOME284001_2_65568	24951	Duplodnaviria;Heunggongvirae;Uroviricota;Caudoviricetes;Caudovirales	Viral database	Methanobacteriota	Methanobacteria	Methanobacteriales	Methanobacteriaceae	Methanobrevibacter_A	Methanobrevibacter_A smithii	VC_324_0	No	NA	Medium-quality	65.51	0	United States	0.0157563	Yes
GPD|uvig_365250	GUT_GENOME273866_45_728	16561	Unassigned		Methanobacteriota	Methanobacteria	Methanobacteriales	Methanobacteriaceae	Methanobrevibacter_A	Methanobrevibacter_A smithii	Outlier	No	NA	Low-quality	43.46	0	United States	0.00157563	Yes
GPD|uvig_382630	GUT_GENOME268814_20_603	18645	Unassigned		Methanobacteriota	Methanobacteria	Methanobacteriales	Methanobacteriaceae	Methanobrevibacter_A	Methanobrevibacter_A smithii	Outlier	No	NA	Low-quality	49.02	0	United States	0.0383403	Yes
GPD|uvig_382962	GUT_GENOME265514_19_8607	77031	Unassigned		Methanobacteriota	Methanobacteria	Methanobacteriales	Methanobacteriaceae	Methanobrevibacter_A	Methanobrevibacter_A smithii	Outlier	No	NA	Medium-quality	53.03	0	Spain,United Kingdom,United States,United States,United States,United States,United States,United Kingdom,United Kingdom,Madagascar,United Kingdom,China,Spain,United Kingdom,Spain,France,United Kingdom,France,United States,China,United Kingdom,Sweden,United Kingdom,Australia,United Kingdom,United States,United States,United Kingdom,United States,Australia,United States,United States,United Kingdo…	0.00735294	No
GPD|uvig_384462	GUT_GENOME218694_90_4917	54697	Duplodnaviria;Heunggongvirae;Uroviricota;Caudoviricetes;Caudovirales	Viral database	Methanobacteriota	Methanobacteria	Methanobacteriales	Methanobacteriaceae	Methanobrevibacter_A	Methanobrevibacter_A smithii	VC_323_0	No	NA	High-quality	100	0	United States	0.00105042	Yes
GPD|uvig_417961	GUT_GENOME001966_77_7974	26306	Unassigned		Methanobacteriota	Methanobacteria	Methanobacteriales	Methanobacteriaceae	Methanobrevibacter_A	Methanobrevibacter_A smithii	Outlier	No	NA	Medium-quality	62.11	0	United States	0.00997899	Yes
GPD|uvig_418233	GUT_GENOME273866_45_728	39081	Duplodnaviria;Heunggongvirae;Uroviricota;Caudoviricetes;Caudovirales	Viral database	Methanobacteriota	Methanobacteria	Methanobacteriales	Methanobacteriaceae	Methanobrevibacter_A	Methanobrevibacter_A smithii	VC_324_0	No	NA	Complete	100	0	United States	0.0052521	Yes
GPD|uvig_441795	GUT_GENOME235230_27_63636	46287	Duplodnaviria;Heunggongvirae;Uroviricota;Caudoviricetes;Caudovirales	Viral database	Methanobacteriota	Methanobacteria	Methanobacteriales	Methanobacteriaceae	Methanobrevibacter_A	Methanobrevibacter_A smithii	VC_324_0	No	NA	High-quality	100	0	United Kingdom,United States,United States,United States,United States,United States,United States	0.0283613	Yes
GPD|uvig_447134	GUT_GENOME256439_3_14691	39152	Duplodnaviria;Heunggongvirae;Uroviricota;Caudoviricetes;Caudovirales	Viral database	Methanobacteriota	Methanobacteria	Methanobacteriales	Methanobacteriaceae	Methanobrevibacter_A	Methanobrevibacter_A smithii	VC_324_0	No	NA	High-quality	100	0	United States	0.0257353	Yes
GPD|uvig_487713	37101.scaffold36606_2_2530	41248	Duplodnaviria;Heunggongvirae;Uroviricota;Caudoviricetes;Caudovirales	Viral database	Methanobacteriota	Methanobacteria	Methanobacteriales	Methanobacteriaceae	Methanobrevibacter_A	Methanobrevibacter_A smithii	VC_358_0	No	NA	Medium-quality	77.53	0	Netherlands	0.0241597	Yes
GPD|uvig_539350	GUT_GENOME104378_7_60982	25507	Unassigned		Methanobacteriota	Methanobacteria	Methanobacteriales	Methanobacteriaceae	Methanobrevibacter_A	Methanobrevibacter_A smithii_A	Outlier	No	NA	Low-quality	22.75	0	United States	0	Yes
GPD|uvig_544466	GUT_GENOME218694_90_4917	24264	Unassigned		Methanobacteriota	Methanobacteria	Methanobacteriales	Methanobacteriaceae	Methanobrevibacter_A	Methanobrevibacter_A smithii	Outlier	No	NA	Medium-quality	63.63	0	Spain	0.0483193	Yes
GPD|uvig_545215	GUT_GENOME256439_3_14691	50913	Duplodnaviria;Heunggongvirae;Uroviricota;Caudoviricetes;Caudovirales	Viral database	Methanobacteriota	Methanobacteria	Methanobacteriales	Methanobacteriaceae	Methanobrevibacter_A	Methanobrevibacter_A smithii	VC_323_0	No	NA	High-quality	95.7	0	Spain	0.0052521	Yes
GPD|uvig_552052	ERR710432.NODE_943_6498	37633	Duplodnaviria;Heunggongvirae;Uroviricota;Caudoviricetes;Caudovirales;Siphoviridae	Viral database	Methanobacteriota	Methanobacteria	Methanobacteriales	Methanobacteriaceae	Methanobrevibacter	Methanobrevibacter olleyae	VC_326_0	No	NA	High-quality	95.12	0	Spain	0.0346639	Yes
GPD|uvig_552115	ERR589775.NODE_71_18440	24133	Duplodnaviria;Heunggongvirae;Uroviricota;Caudoviricetes;Caudovirales;Siphoviridae	Viral database	Methanobacteriota	Methanobacteria	Methanobacteriales	Methanobacteriaceae	Methanobrevibacter_A	Methanobrevibacter_A smithii	VC_326_0	No	NA	Medium-quality	61.05	0	Spain	0.042542	Yes
GPD|uvig_552897	ERR710432.NODE_943_6498	38969	Duplodnaviria;Heunggongvirae;Uroviricota;Caudoviricetes;Caudovirales;Siphoviridae	Viral database	Methanobacteriota	Methanobacteria	Methanobacteriales	Methanobacteriaceae	Methanobrevibacter	Methanobrevibacter olleyae	VC_326_0	No	NA	Complete	100	0	Spain	0.00577731	Yes
GPD|uvig_558240	GUT_GENOME257377_3_110189	29238	Duplodnaviria;Heunggongvirae;Uroviricota;Caudoviricetes;Caudovirales	Viral database	Methanobacteriota	Methanobacteria	Methanobacteriales	Methanobacteriaceae	Methanobrevibacter_A	Methanobrevibacter_A smithii	VC_358_0	No	NA	Medium-quality	54.96	0	Spain	0.00315126	Yes
GPD|uvig_558467	ERR710432.NODE_943_6498	38633	Duplodnaviria;Heunggongvirae;Uroviricota;Caudoviricetes;Caudovirales;Siphoviridae	Viral database	Methanobacteriota	Methanobacteria	Methanobacteriales	Methanobacteriaceae	Methanobrevibacter	Methanobrevibacter olleyae	VC_326_0	No	NA	Complete	100	0	Spain	0.0168067	Yes
GPD|uvig_558965	GUT_GENOME257377_3_110189	39703	Duplodnaviria;Heunggongvirae;Uroviricota;Caudoviricetes;Caudovirales	Viral database	Methanobacteriota	Methanobacteria	Methanobacteriales	Methanobacteriaceae	Methanobrevibacter_A	Methanobrevibacter_A smithii	VC_358_0	No	NA	Medium-quality	74.63	0	Spain	0.0262605	Yes
GPD|uvig_565281	GUT_GENOME143494_1_493461	15531	Duplodnaviria;Heunggongvirae;Uroviricota;Caudoviricetes;Caudovirales	Eggnog markers	Methanobacteriota	Methanobacteria	Methanobacteriales	Methanobacteriaceae	Methanosphaera	Methanosphaera stadtmanae	Overlap (VC_388/VC_389)	No	NA	Low-quality	37.89	0	Netherlands,Spain,Spain,Spain,Spain,Spain,Spain,Spain	0.0210084	Yes
GPD|uvig_565629	GUT_GENOME218694_90_4917	52324	Duplodnaviria;Heunggongvirae;Uroviricota;Caudoviricetes;Caudovirales	Viral database	Methanobacteriota	Methanobacteria	Methanobacteriales	Methanobacteriaceae	Methanobrevibacter_A	Methanobrevibacter_A smithii	VC_323_0	No	NA	High-quality	98.35	0	Spain	0.0288866	Yes
GPD|uvig_566125	GUT_GENOME259830_12_62046	11636	Unassigned		Methanobacteriota	Methanobacteria	Methanobacteriales	Methanobacteriaceae	Methanobrevibacter_A	Methanobrevibacter_A smithii	Outlier	No	NA	Low-quality	30.53	0	Spain,	0.0273109	Yes
GPD|uvig_580462	GUT_GENOME236826_98_7468	36869	Duplodnaviria;Heunggongvirae;Uroviricota;Caudoviricetes;Caudovirales	Viral database	Thermoplasmatota	Thermoplasmata	Methanomassiliicoccales	Methanomethylophilaceae	UBA71	Unassigned	VC_397_0	No	NA	High-quality	97.35	0	Madagascar	0.0183824	Yes
GPD|uvig_582667	GUT_GENOME218694_90_4917	12392	Duplodnaviria;Heunggongvirae;Uroviricota;Caudoviricetes;Caudovirales;Siphoviridae	Viral database	Methanobacteriota	Methanobacteria	Methanobacteriales	Methanobacteriaceae	Methanobrevibacter_A	Methanobrevibacter_A smithii	VC_383_0	No	NA	Low-quality	23.29	0	Madagascar	0.0330882	Yes
GPD|uvig_584620	GUT_GENOME246782_4_15826	101696	Unassigned		Methanobacteriota	Methanobacteria	Methanobacteriales	Methanobacteriaceae	Methanobrevibacter_A	Methanobrevibacter_A smithii	VC_389_0	No	NA	Medium-quality	77.32	0	Madagascar	0.0220588	Yes
GPD|uvig_587908	ERR589790.NODE_500_187	37871	Duplodnaviria;Heunggongvirae;Uroviricota;Caudoviricetes;Caudovirales	Viral database	Methanobacteriota	Methanobacteria	Methanobacteriales	Methanobacteriaceae	Methanobrevibacter_A	Methanobrevibacter_A smithii	VC_359_0	No	NA	Medium-quality	69.5	0	Madagascar	0.0168067	Yes
GPD|uvig_591342	GUT_GENOME218694_90_4917	53082	Duplodnaviria;Heunggongvirae;Uroviricota;Caudoviricetes;Caudovirales	Viral database	Methanobacteriota	Methanobacteria	Methanobacteriales	Methanobacteriaceae	Methanobrevibacter_A	Methanobrevibacter_A smithii	VC_323_0	No	NA	High-quality	99.78	0	Madagascar	0.0168067	Yes
GPD|uvig_591350	GUT_GENOME236826_98_7468	37178	Duplodnaviria;Heunggongvirae;Uroviricota;Caudoviricetes;Caudovirales	Viral database	Thermoplasmatota	Thermoplasmata	Methanomassiliicoccales	Methanomethylophilaceae	UBA71	Unassigned	VC_397_0	No	NA	High-quality	97.86	0	Madagascar	0.00210084	Yes
GPD|uvig_59249	CCIS38765456ST-20-0.NODE_125_97436	37941	Duplodnaviria;Heunggongvirae;Uroviricota;Caudoviricetes;Caudovirales	Viral database	Methanobacteriota	Methanobacteria	Methanobacteriales	Methanobacteriaceae	Methanobrevibacter_A	Methanobrevibacter_A smithii	VC_324_0	No	NA	Complete	100	0	Denmark	0.0273109	Yes
GPD|uvig_593340	GUT_GENOME266751_6_17485	23440	Duplodnaviria;Heunggongvirae;Uroviricota;Caudoviricetes;Caudovirales;Siphoviridae	Viral database	Methanobacteriota	Methanobacteria	Methanobacteriales	Methanobacteriaceae	Methanobrevibacter_A	Methanobrevibacter_A smithii	VC_383_0	No	NA	Low-quality	44.06	0	Madagascar	0.0168067	Yes
GPD|uvig_593635	GUT_GENOME218694_90_4917	12157	Duplodnaviria;Heunggongvirae;Uroviricota;Caudoviricetes;Caudovirales;Siphoviridae	Viral database	Methanobacteriota	Methanobacteria	Methanobacteriales	Methanobacteriaceae	Methanobrevibacter_A	Methanobrevibacter_A smithii	VC_383_0	No	NA	Low-quality	22.85	0	Madagascar	0.0241597	Yes
GPD|uvig_594210	GUT_GENOME257377_3_110189	25705	Duplodnaviria;Heunggongvirae;Uroviricota;Caudoviricetes;Caudovirales	Viral database	Methanobacteriota	Methanobacteria	Methanobacteriales	Methanobacteriaceae	Methanobrevibacter_A	Methanobrevibacter_A smithii	VC_358_0	No	NA	Low-quality	46.93	0	Madagascar	0.00262605	Yes
GPD|uvig_595957	ERR589769.NODE_2060_898	72281	Unassigned		Thermoplasmatota	Thermoplasmata	Methanomassiliicoccales	Methanomethylophilaceae	UBA71	UBA71 sp006954465	Outlier	No	NA	Medium-quality	85.93	0	Madagascar	0.0908613	Yes
GPD|uvig_597759	GUT_GENOME272466_3_106475	43369	Duplodnaviria;Heunggongvirae;Uroviricota;Caudoviricetes;Caudovirales	Viral database	Methanobacteriota	Methanobacteria	Methanobacteriales	Methanobacteriaceae	Methanobrevibacter_A	Methanobrevibacter_A smithii	VC_358_0	No	NA	Medium-quality	81.52	0	Madagascar	0	Yes
GPD|uvig_598747	GUT_GENOME282407_15_5026	58506	Duplodnaviria;Heunggongvirae;Uroviricota;Caudoviricetes;Caudovirales	Viral database	Methanobacteriota	Methanobacteria	Methanobacteriales	Methanobacteriaceae	Methanobrevibacter_A	Methanobrevibacter_A smithii_A	VC_359_0	No	NA	High-quality	100	0	Ethiopia	0.00052521	Yes
GPD|uvig_7979	GUT_GENOME265776_7_73441	12387	Duplodnaviria;Heunggongvirae;Uroviricota;Caudoviricetes;Caudovirales	Eggnog markers	Methanobacteriota	Methanobacteria	Methanobacteriales	Methanobacteriaceae	Methanobrevibacter_A	Methanobrevibacter_A smithii	Outlier	No	NA	Low-quality	31.43	0	Spain	0.00210084	Yes
GPD|uvig_85096	GUT_GENOME256439_3_14691	11972	Duplodnaviria;Heunggongvirae;Uroviricota;Caudoviricetes;Caudovirales	Eggnog markers	Methanobacteriota	Methanobacteria	Methanobacteriales	Methanobacteriaceae	Methanobrevibacter_A	Methanobrevibacter_A smithii	Outlier	No	NA	Low-quality	30.27	0	Spain	0.022584	Yes
GPD|uvig_86060	ERR710432.NODE_943_6498	40274	Duplodnaviria;Heunggongvirae;Uroviricota;Caudoviricetes;Caudovirales;Siphoviridae	Viral database	Methanobacteriota	Methanobacteria	Methanobacteriales	Methanobacteriaceae	Methanobrevibacter	Methanobrevibacter olleyae	VC_326_0	No	NA	Complete	100	0	Denmark	0.0346639	Yes
HMP.158013734.contig105867_751	GUT_GENOME268063_5_126471	751	Unassigned		Methanobacteriota	Methanobacteria	Methanobacteriales	Methanobacteriaceae	Methanobrevibacter_A	Methanobrevibacter_A smithii	Singleton	No	NA	Low-quality	1.21	0	America	0.0178571	No
HMP.158033964.contig10010_3151	GUT_GENOME104744_2_73669	3151	Unassigned		Methanobacteriota	Methanobacteria	Methanobacteriales	Methanobacteriaceae	Methanobrevibacter_A	Methanobrevibacter_A smithii	Outlier	No	NA	Not-determined	NA	0	America	0.00052521	No
HMP.158033964.contig48760_12658	GUT_GENOME215821_25_288596	12658	Unassigned		Thermoplasmatota	Thermoplasmata	Methanomassiliicoccales	Methanomassiliicoccaceae	Methanomassiliicoccus_A	Methanomassiliicoccus_A intestinalis	Outlier	No	NA	Low-quality	42.14	0	America	0.0131303	Yes
HMP.158499257.contig46474_38876	CCIS38765456ST-20-0.NODE_125_97436	38876	Duplodnaviria;Heunggongvirae;Uroviricota;Caudoviricetes;Caudovirales	Viral database	Methanobacteriota	Methanobacteria	Methanobacteriales	Methanobacteriaceae	Methanobrevibacter_A	Methanobrevibacter_A smithii	VC_324_0	No	NA	High-quality	100	0	America	0.00052521	Yes
HMP.158742018.contig20391_540	GUT_GENOME268063_5_126471	540	Unassigned		Methanobacteriota	Methanobacteria	Methanobacteriales	Methanobacteriaceae	Methanobrevibacter_A	Methanobrevibacter_A smithii	Singleton	No	NA	Not-determined	NA	0	America	0.029937	No
HMP.159268001.contig172287_2042	GUT_GENOME270743_20_17178	2042	Unassigned		Methanobacteriota	Methanobacteria	Methanobacteriales	Methanobacteriaceae	Methanosphaera	Methanosphaera stadtmanae	Singleton	No	NA	Not-determined	NA	0	America	0.00472689	No
HMP.159268001.contig49462_11939	GUT_GENOME143494_1_493461	11939	Duplodnaviria;Heunggongvirae;Uroviricota;Caudoviricetes;Caudovirales	Eggnog markers	Methanobacteriota	Methanobacteria	Methanobacteriales	Methanobacteriaceae	Methanosphaera	Methanosphaera stadtmanae	Overlap (VC_388/VC_389)	No	NA	Low-quality	29.85	0	America	0.0404412	No
HMP.159268001.contig52769_3480	GUT_GENOME270573_59_36	3480	Unassigned		Methanobacteriota	Methanobacteria	Methanobacteriales	Methanobacteriaceae	Methanosphaera	Methanosphaera stadtmanae	Singleton	No	NA	Not-determined	NA	0	America	0.0315126	Yes
HMP.370027359.contig207374_1117	GUT_GENOME283326_2_365604	1117	Unassigned		Methanobacteriota	Methanobacteria	Methanobacteriales	Methanobacteriaceae	Methanobrevibacter_A	Methanobrevibacter_A smithii	Outlier	No	NA	Low-quality	2.16	0	America	0.00210084	No
HMP.370027359.contig208542_5295	GUT_GENOME092376_21_25233	5295	Unassigned		Methanobacteriota	Methanobacteria	Methanobacteriales	Methanobacteriaceae	Methanobrevibacter_A	Methanobrevibacter_A smithii_A	Outlier	No	NA	Low-quality	11.65	0	America	0.0220588	No
HMP.370027359.contig60005_6711	37101.scaffold36606_2_2530	6711	Unassigned		Methanobacteriota	Methanobacteria	Methanobacteriales	Methanobacteriaceae	Methanobrevibacter_A	Methanobrevibacter_A smithii	VC_385_0	No	NA	Low-quality	14.12	0	America	0.0215336	Yes
HMP.706846339.contig81847_53536	GUT_GENOME266751_6_17485	53536	Duplodnaviria;Heunggongvirae;Uroviricota;Caudoviricetes;Caudovirales	Viral database	Methanobacteriota	Methanobacteria	Methanobacteriales	Methanobacteriaceae	Methanobrevibacter_A	Methanobrevibacter_A smithii	VC_358_0	No	NA	Complete	100	0	America	0.00210084	Yes
HMP.763678604.contig63623_40452	ERR710432.NODE_943_6498	40452	Duplodnaviria;Heunggongvirae;Uroviricota;Caudoviricetes;Caudovirales;Siphoviridae	Viral database	Methanobacteriota	Methanobacteria	Methanobacteriales	Methanobacteriaceae	Methanobrevibacter	Methanobrevibacter olleyae	VC_326_0	No	NA	Complete	100	0	America	0.00105042	Yes
HMP.763698834.contig11430_20516	GUT_GENOME153214_10_46014	20516	Duplodnaviria;Heunggongvirae;Uroviricota;Caudoviricetes;Caudovirales	VOGdb markers	Methanobacteriota	Methanobacteria	Methanobacteriales	Methanobacteriaceae	Methanobrevibacter_A	Methanobrevibacter_A smithii	VC_378_0	No	NA	Low-quality	37.64	0	America	0.0189076	Yes
HMP.763698834.contig46144_772	GUT_GENOME105044_15_25576	772	Unassigned		Methanobacteriota	Methanobacteria	Methanobacteriales	Methanobacteriaceae	Methanobrevibacter_A	Methanobrevibacter_A smithii	Singleton	No	NA	Low-quality	1.42	0	America	0.00052521	No
HMP.763860675.contig14653_37521	GUT_GENOME284634_22_10926	37521	Unassigned		Methanobacteriota	Methanobacteria	Methanobacteriales	Methanobacteriaceae	Methanobrevibacter_A	Methanobrevibacter_A smithii	Outlier	No	NA	Not-determined	NA	0	America	0.0204832	Yes
HMP.763860675.contig62466_36144	GUT_GENOME118976_2_16387	36144	Unassigned		Methanobacteriota	Methanobacteria	Methanobacteriales	Methanobacteriaceae	Methanobrevibacter_A	Methanobrevibacter_A smithii	Outlier	No	NA	Not-determined	NA	0	America	0.0420168	No
HMP.763860675.contig65806_66934	GUT_GENOME251364_2_123712	66934	Unassigned		Methanobacteriota	Methanobacteria	Methanobacteriales	Methanobacteriaceae	Methanobrevibacter_A	Methanobrevibacter_A smithii_A	VC_331_3	No	NA	Not-determined	NA	0	America	0.0267857	No
HMP.763860675.contig67146_10080	GUT_GENOME284814_21_22677	10080	Unassigned		Methanobacteriota	Methanobacteria	Methanobacteriales	Methanobacteriaceae	Methanobrevibacter_A	Methanobrevibacter_A smithii_A	VC_364_0	No	NA	Low-quality	9.92	0	America	0.00787815	No
HMP.763860675.contig68163_5869	GUT_GENOME273630_6_80982	5869	Unassigned		Methanobacteriota	Methanobacteria	Methanobacteriales	Methanobacteriaceae	Methanobrevibacter_A	Methanobrevibacter_A smithii	Singleton	No	NA	Not-determined	NA	0	America	0.00105042	Yes
HMP.764062976.contig18993_126298	GUT_GENOME093215_4_44917	126298	Unassigned		Methanobacteriota	Methanobacteria	Methanobacteriales	Methanobacteriaceae	Methanobrevibacter_A	Methanobrevibacter_A smithii	VC_356_0	No	NA	Not-determined	NA	0	America	0.0115546	No
HMP.764062976.contig215436_8358	GUT_GENOME143185_16_1306	8358	Unassigned		Methanobacteriota	Methanobacteria	Methanobacteriales	Methanobacteriaceae	Methanobrevibacter_A	Methanobrevibacter_A smithii_A	VC_369_0	No	NA	Not-determined	NA	0	America	0.00682773	No
HMP.764062976.contig36899_56556	GUT_GENOME266751_6_17485	56556	Duplodnaviria;Heunggongvirae;Uroviricota;Caudoviricetes;Caudovirales	Viral database	Methanobacteriota	Methanobacteria	Methanobacteriales	Methanobacteriaceae	Methanobrevibacter_A	Methanobrevibacter_A smithii	VC_358_0	No	NA	High-quality	100	0	America	0.00105042	Yes
HMP.764062976.contig60515_51795	GUT_GENOME279910_4_62128	51795	Unassigned		Methanobacteriota	Methanobacteria	Methanobacteriales	Methanobacteriaceae	Methanobrevibacter_A	Methanobrevibacter_A smithii	Outlier	No	NA	Not-determined	NA	0	America	0.0257353	No
HMP.764062976.contig61675_12891	GUT_GENOME284410_17_34955	12891	Unassigned		Methanobacteriota	Methanobacteria	Methanobacteriales	Methanobacteriaceae	Methanobrevibacter_A	Methanobrevibacter_A smithii	Outlier	No	NA	Not-determined	NA	0	America	0.029937	No
HMP.764062976.contig62638_78500	GUT_GENOME268434_7_1368	78500	Unassigned		Methanobacteriota	Methanobacteria	Methanobacteriales	Methanobacteriaceae	Methanobrevibacter_A	Methanobrevibacter_A smithii	VC_333_0	No	NA	Not-determined	NA	0	America	0.0252101	No
HMP.764062976.contig72590_44039	GUT_GENOME205625_22_393	44039	Unassigned		Methanobacteriota	Methanobacteria	Methanobacteriales	Methanobacteriaceae	Methanobrevibacter_A	Methanobrevibacter_A smithii	Outlier	No	NA	Not-determined	NA	0	America	0.00157563	No
HMP.764062976.contig74748_79286	GUT_GENOME269219_18_19236	79286	Unassigned		Methanobacteriota	Methanobacteria	Methanobacteriales	Methanobacteriaceae	Methanobrevibacter_A	Methanobrevibacter_A smithii	Outlier	No	NA	Not-determined	NA	0	America	0.00315126	No
HMP.764062976.contig76038_48683	GUT_GENOME284634_22_10926	48683	Unassigned		Methanobacteriota	Methanobacteria	Methanobacteriales	Methanobacteriaceae	Methanobrevibacter_A	Methanobrevibacter_A smithii	Outlier	No	NA	Not-determined	NA	0	America	0.00157563	No
HMP.764062976.contig76237_20630	GUT_GENOME011061_10_783	20630	Unassigned		Methanobacteriota	Methanobacteria	Methanobacteriales	Methanobacteriaceae	Methanobrevibacter_A	Methanobrevibacter_A smithii	Outlier	No	NA	Not-determined	NA	0	America	0.0315126	No
HMP.764083206.contig105735_12761	GUT_GENOME265514_3_164993	12761	Unassigned		Methanobacteriota	Methanobacteria	Methanobacteriales	Methanobacteriaceae	Methanobrevibacter_A	Methanobrevibacter_A smithii	Outlier	No	NA	Not-determined	NA	0	America	0.00735294	No
HMP.764083206.contig136723_14329	GUT_GENOME247414_2_5385	14329	Unassigned		Methanobacteriota	Methanobacteria	Methanobacteriales	Methanobacteriaceae	Methanobrevibacter_A	Methanobrevibacter_A smithii	Outlier	No	NA	Not-determined	NA	0	America	0.00105042	Yes
HMP.764083206.contig142169_8441	GUT_GENOME018608_1_39351	8441	Unassigned		Methanobacteriota	Methanobacteria	Methanobacteriales	Methanobacteriaceae	Methanobrevibacter_A	Methanobrevibacter_A smithii	Outlier	No	NA	Not-determined	NA	0	America	0.0236345	No
HMP.764083206.contig147318_6113	GUT_GENOME134626_6_3293	6113	Unassigned		Methanobacteriota	Methanobacteria	Methanobacteriales	Methanobacteriaceae	Methanobrevibacter_A	Methanobrevibacter_A smithii	Outlier	No	NA	Low-quality	3.34	0	America	0.00210084	No
HMP.764083206.contig155544_8721	GUT_GENOME090618_39_11160	8721	Unassigned		Methanobacteriota	Methanobacteria	Methanobacteriales	Methanobacteriaceae	Methanobrevibacter_A	Methanobrevibacter_A smithii	VC_360_0	No	NA	Not-determined	NA	0	America	0.00157563	No
HMP.764791260.contig141806_5280	GUT_GENOME268814_20_603	5280	Unassigned		Methanobacteriota	Methanobacteria	Methanobacteriales	Methanobacteriaceae	Methanobrevibacter_A	Methanobrevibacter_A smithii	Outlier	No	NA	Low-quality	13.86	0	America	0.0367647	No
HMP.SRS019582.scaffold7592_1_3885	GUT_GENOME058005_1_19587	3885	Unassigned		Methanobacteriota	Methanobacteria	Methanobacteriales	Methanobacteriaceae	Methanobrevibacter_A	Methanobrevibacter_A smithii	Outlier	No	NA	Low-quality	10.17	0	America	0.0246849	Yes
HMP.SRS020869.scaffold38272_1_332	ERR688624.NODE_1318_4035	332	Unassigned		Methanobacteriota	Methanobacteria	Methanobacteriales	Methanobacteriaceae	Methanobrevibacter_A	Methanobrevibacter_A smithii	Singleton	No	NA	Low-quality	0.87	0	America	0.0246849	No
HMP.SRS023914.scaffold102073_1_1136	GUT_GENOME270743_20_17178	1136	Unassigned		Methanobacteriota	Methanobacteria	Methanobacteriales	Methanobacteriaceae	Methanosphaera	Methanosphaera stadtmanae	Singleton	No	NA	Not-determined	NA	0	America	0	No
HMP.SRS048870.scaffold27331_1_44971	GUT_GENOME007534_1_364910	44971	Unassigned		Thermoplasmatota	Thermoplasmata	Methanomassiliicoccales	Methanomassiliicoccaceae	Methanomassiliicoccus	Methanomassiliicoccus intestinalis	VC_373_0	No	NA	Not-determined	NA	0	America	0.00105042	No
HMP.SRS048870.scaffold37535_1_24492	GUT_GENOME007534_1_361213	24492	Unassigned		Thermoplasmatota	Thermoplasmata	Methanomassiliicoccales	Methanomassiliicoccaceae	Methanomassiliicoccus	Methanomassiliicoccus intestinalis	Outlier	No	NA	Not-determined	NA	0	America	0.0189076	No
HMP.SRS048870.scaffold37591_1_30851	GUT_GENOME215821_25_288326	30851	Unassigned		Thermoplasmatota	Thermoplasmata	Methanomassiliicoccales	Methanomassiliicoccaceae	Methanomassiliicoccus	Methanomassiliicoccus intestinalis	Outlier	No	NA	Not-determined	NA	0	America	0.0220588	No
HMP.SRS048870.scaffold89200_1_15720	GUT_GENOME007534_1_358110	15720	Unassigned		Thermoplasmatota	Thermoplasmata	Methanomassiliicoccales	Methanomassiliicoccaceae	Methanomassiliicoccus	Methanomassiliicoccus intestinalis	VC_373_0	No	NA	Not-determined	NA	0	America	0.00210084	No
HMP.SRS049773.contig26103_1905	ERR589790.NODE_500_187	1905	Unassigned		Methanobacteriota	Methanobacteria	Methanobacteriales	Methanobacteriaceae	Methanobrevibacter_A	Methanobrevibacter_A smithii	Singleton	No	NA	Not-determined	NA	0	America	0.00997899	No
HMP.SRS049773.contig8443_4801	GUT_GENOME273630_25_13332	4801	Unassigned		Methanobacteriota	Methanobacteria	Methanobacteriales	Methanobacteriaceae	Methanobrevibacter_A	Methanobrevibacter_A smithii	VC_379_0	No	NA	Not-determined	NA	0	America	0.019958	Yes
HMP.SRS055017.contig131148_8109	37101.scaffold36606_2_2530	8109	Unassigned		Methanobacteriota	Methanobacteria	Methanobacteriales	Methanobacteriaceae	Methanobrevibacter_A	Methanobrevibacter_A smithii	VC_385_0	No	NA	Low-quality	14.78	0	America	0.0383403	Yes
HMP.SRS055017.contig37574_35635	GUT_GENOME058005_1_18148	35635	Duplodnaviria;Heunggongvirae;Uroviricota;Caudoviricetes;Caudovirales	Viral database	Methanobacteriota	Methanobacteria	Methanobacteriales	Methanobacteriaceae	Methanobrevibacter_A	Methanobrevibacter_A smithii	VC_358_0	No	NA	Medium-quality	66.98	0	America	0	Yes
HMP.SRS077024.contig34979_404	GUT_GENOME135949_10_17676	404	Duplodnaviria;Heunggongvirae;Uroviricota;Caudoviricetes;Caudovirales	VOGdb markers	Methanobacteriota	Methanobacteria	Methanobacteriales	Methanobacteriaceae	Methanobrevibacter_A	Methanobrevibacter_A smithii	VC_386_0	No	NA	Not-determined	NA	0	America	0.00472689	No
HMP.SRS077392.contig145086_682	GUT_GENOME283665_29_11471	682	Unassigned		Methanobacteriota	Methanobacteria	Methanobacteriales	Methanobacteriaceae	Methanobrevibacter_A	Methanobrevibacter_A smithii	Singleton	No	NA	Not-determined	NA	0	America	0.00420168	No
HMP.SRS1041033.contig18634_8187	GUT_GENOME273630_6_80982	8187	Unassigned		Methanobacteriota	Methanobacteria	Methanobacteriales	Methanobacteriaceae	Methanobrevibacter_A	Methanobrevibacter_A smithii	VC_376_0	No	NA	Not-determined	NA	0	America	0.0115546	Yes
HMP.SRS1055056.contig18050_857	GUT_GENOME268740_5_138571	857	Unassigned		Methanobacteriota	Methanobacteria	Methanobacteriales	Methanobacteriaceae	Methanobrevibacter_A	Methanobrevibacter_A smithii	Singleton	No	NA	Not-determined	NA	0	America	0.0288866	No
HMP.SRS142503.contig14153_1569	GUT_GENOME230857_21_43860	1569	Unassigned		Methanobacteriota	Methanobacteria	Methanobacteriales	Methanobacteriaceae	Methanobrevibacter_A	Methanobrevibacter_A smithii	Singleton	No	NA	Low-quality	2.95	0	America	0.0288866	No
HMP.SRS142503.contig16983_1902	37101.scaffold36606_2_1938	1902	Unassigned		Methanobacteriota	Methanobacteria	Methanobacteriales	Methanobacteriaceae	Methanobrevibacter_A	Methanobrevibacter_A smithii	Outlier	No	NA	Low-quality	3.58	0	America	0.0162815	Yes
HMP.SRS144183.contig99003_1672	SRR9655013.NODE_1263_8534	1672	Unassigned		Methanobacteriota	Methanobacteria	Methanobacteriales	Methanobacteriaceae	Methanobrevibacter_A	Methanobrevibacter_A smithii_A	Singleton	No	NA	Low-quality	4.06	0	America	0.0304622	No
HMP.SRS147271.contig3753_1100	GUT_GENOME134626_20_14139	1100	Unassigned		Methanobacteriota	Methanobacteria	Methanobacteriales	Methanobacteriaceae	Methanobrevibacter_A	Methanobrevibacter_A smithii	Outlier	No	NA	Low-quality	2.73	0	America	0.00262605	No
HMP.SRS147271.contig68620_803	GUT_GENOME153214_10_45682	803	Unassigned		Methanobacteriota	Methanobacteria	Methanobacteriales	Methanobacteriaceae	Methanobrevibacter_A	Methanobrevibacter_A smithii	Singleton	No	NA	Not-determined	NA	0	America	0	No
HMP.SRS148196.contig14163_728	GUT_GENOME259830_12_64363	728	Unassigned		Methanobacteriota	Methanobacteria	Methanobacteriales	Methanobacteriaceae	Methanobrevibacter_A	Methanobrevibacter_A smithii	Singleton	No	NA	Low-quality	1.37	0	America	0.00105042	No
HMP.SRS148196.contig141895_1499	CCIS79210440ST-3-0.NODE_199_3971	1499	Duplodnaviria;Heunggongvirae;Uroviricota;Caudoviricetes;Caudovirales	VOGdb markers	Methanobacteriota	Methanobacteria	Methanobacteriales	Methanobacteriaceae	Methanobrevibacter_A	Methanobrevibacter_A smithii_A	VC_396_0	No	NA	Low-quality	2.82	0	America	0.0194328	No
HMP.SRS148215.contig12319_615	CCIS79210440ST-3-0.NODE_199_3971	615	Unassigned		Methanobacteriota	Methanobacteria	Methanobacteriales	Methanobacteriaceae	Methanobrevibacter_A	Methanobrevibacter_A smithii_A	Singleton	No	NA	Low-quality	1.62	0	America	0.0168067	No
HMP.SRS149784.contig108391_2126	GUT_GENOME031107_10_21745	2126	Unassigned		Methanobacteriota	Methanobacteria	Methanobacteriales	Methanobacteriaceae	Methanobrevibacter_A	Methanobrevibacter_A smithii	Outlier	No	NA	Low-quality	3.84	0	America	0.0110294	Yes
HMP.SRS149784.contig25778_8396	GUT_GENOME273866_45_728	8396	Unassigned		Methanobacteriota	Methanobacteria	Methanobacteriales	Methanobacteriaceae	Methanobrevibacter_A	Methanobrevibacter_A smithii	Outlier	No	NA	Low-quality	21.8	0	America	0.0178571	Yes
IMG|DTR_387488	GUT_GENOME236826_98_7468	38132	Duplodnaviria;Heunggongvirae;Uroviricota;Caudoviricetes;Caudovirales	Viral database	Thermoplasmatota	Thermoplasmata	Methanomassiliicoccales	Methanomethylophilaceae	UBA71	Unassigned	VC_397_0	No	NA	High-quality	100	0		0.0162815	Yes
IMG|DTR_392373	GUT_GENOME230857_21_44924	55365	Duplodnaviria;Heunggongvirae;Uroviricota;Caudoviricetes;Caudovirales	Viral database	Methanobacteriota	Methanobacteria	Methanobacteriales	Methanobacteriaceae	Methanobrevibacter_A	Methanobrevibacter_A smithii	VC_359_0	No	NA	High-quality	100	0		0.019958	Yes
IMG|DTR_584019	ERR710432.NODE_943_6498	38017	Duplodnaviria;Heunggongvirae;Uroviricota;Caudoviricetes;Caudovirales;Siphoviridae	Viral database	Methanobacteriota	Methanobacteria	Methanobacteriales	Methanobacteriaceae	Methanobrevibacter	Methanobrevibacter olleyae	VC_326_0	No	NA	High-quality	96.34	0		0.0246849	Yes
IMG|DTR_733507	GUT_GENOME235230_27_63636	39067	Duplodnaviria;Heunggongvirae;Uroviricota;Caudoviricetes;Caudovirales	Viral database	Methanobacteriota	Methanobacteria	Methanobacteriales	Methanobacteriaceae	Methanobrevibacter_A	Methanobrevibacter_A smithii	VC_324_0	No	NA	High-quality	100	0		0.0162815	Yes
IMG|GCA_003963595.1	GUT_GENOME141221_1_931761	2467	Monodnaviria;Shotokuvirae;Cressdnaviricota;Arfiviricetes;Cremevirales;Smacoviridae;Huchismacovirus;	Viral database	Thermoplasmatota	Thermoplasmata	Methanomassiliicoccales	Methanomassiliicoccaceae	Methanomassiliicoccus	Methanomassiliicoccus intestinalis	VC_440_0	No	NA	High-quality	100	0		0.0194328	No
IMG|GCA_003963895.1	GUT_GENOME141221_1_931761	2477	Monodnaviria;Shotokuvirae;Cressdnaviricota;Arfiviricetes;Cremevirales;Smacoviridae;Huchismacovirus;	Viral database	Thermoplasmatota	Thermoplasmata	Methanomassiliicoccales	Methanomassiliicoccaceae	Methanomassiliicoccus	Methanomassiliicoccus intestinalis	VC_440_0	No	NA	High-quality	100	0		0.00052521	Yes
IMG|GCA_003964035.1	GUT_GENOME102627_1_289136	2457	Monodnaviria;Shotokuvirae;Cressdnaviricota;Arfiviricetes;Cremevirales;Smacoviridae;Huchismacovirus;	Viral database	Thermoplasmatota	Thermoplasmata	Methanomassiliicoccales	Methanomassiliicoccaceae	Methanomassiliicoccus	Methanomassiliicoccus intestinalis	VC_441_0	No	NA	High-quality	100	0		0.00052521	Yes
IMG|GCA_003964135.1	GUT_GENOME141221_1_930818	2456	Monodnaviria;Shotokuvirae;Cressdnaviricota;Arfiviricetes;Cremevirales;Smacoviridae	Viral database	Thermoplasmatota	Thermoplasmata	Methanomassiliicoccales	Methanomassiliicoccaceae	Methanomassiliicoccus	Methanomassiliicoccus intestinalis	VC_439_0	No	NA	High-quality	99.96	0		0.0120798	No
IMG|IMGVR_UViG_2065487003_000002|2065487003|mockstg_il_soap_contig_48	GUT_GENOME235230_27_63636	27418	Duplodnaviria;Heunggongvirae;Uroviricota;Caudoviricetes;Caudovirales	Viral database	Methanobacteriota	Methanobacteria	Methanobacteriales	Methanobacteriaceae	Methanobrevibacter_A	Methanobrevibacter_A smithii	VC_324_0	No	NA	Medium-quality	72.03	0		0	Yes
IMG|IMGVR_UViG_2554235476_000001|2554235476|2554309869	GUT_GENOME100276_5_249521	7915	Monodnaviria;Trapavirae;Saleviricota;Huolimaviricetes;Haloruvirales;Pleolipoviridae;Betapleolipovirus;	Viral database	Halobacteriota	Halobacteria	Halobacteriales	Haloferacaceae	Haloferax	Haloferax massiliensis	VC_433_0	No	NA	Medium-quality	67.99	0		0.00157563	Yes
IMG|IMGVR_UViG_2554235498_000001|2554235498|2554311572	GUT_GENOME100276_5_249521	8008	Monodnaviria;Trapavirae;Saleviricota;Huolimaviricetes;Haloruvirales;Pleolipoviridae;Betapleolipovirus;	Viral database	Halobacteriota	Halobacteria	Halobacteriales	Haloferacaceae	Haloferax	Haloferax massiliensis	VC_433_0	No	NA	Medium-quality	68.78	0		0.00210084	Yes
IMG|IMGVR_UViG_3300007802_000040|3300007802|Ga0105667_101691	GUT_GENOME143494_1_493461	17319	Duplodnaviria;Heunggongvirae;Uroviricota;Caudoviricetes;Caudovirales	Eggnog markers	Methanobacteriota	Methanobacteria	Methanobacteriales	Methanobacteriaceae	Methanosphaera	Methanosphaera stadtmanae	VC_388_0	No	NA	Low-quality	41.87	0		0.0231092	Yes
IMG|IMGVR_UViG_3300008132_000081|3300008132|Ga0111230_1002000	GUT_GENOME215821_25_288527	12596	Duplodnaviria;Heunggongvirae;Uroviricota;Caudoviricetes;Caudovirales;Podoviridae	Viral database	Thermoplasmatota	Thermoplasmata	Methanomassiliicoccales	Methanomassiliicoccaceae	Methanomassiliicoccus	Methanomassiliicoccus intestinalis	VC_395_0	No	NA	Low-quality	41.93	0		0.0131303	Yes
IMG|IMGVR_UViG_3300008268_000037|3300008268|Ga0111491_1000709	CCIS38765456ST-20-0.NODE_125_97436	38290	Duplodnaviria;Heunggongvirae;Uroviricota;Caudoviricetes;Caudovirales	Viral database	Methanobacteriota	Methanobacteria	Methanobacteriales	Methanobacteriaceae	Methanobrevibacter_A	Methanobrevibacter_A smithii	VC_324_0	No	NA	High-quality	100	0		0.0588235	Yes
IMG|IMGVR_UViG_3300008299_000034|3300008299|Ga0114868_1000657|1185-38654	GUT_GENOME273866_45_728	37470	Duplodnaviria;Heunggongvirae;Uroviricota;Caudoviricetes;Caudovirales	Viral database	Methanobacteriota	Methanobacteria	Methanobacteriales	Methanobacteriaceae	Methanobrevibacter_A	Methanobrevibacter_A smithii	VC_324_0	No	NA	High-quality	98.38	0		0.0262605	Yes
IMG|IMGVR_UViG_3300008523_000017|3300008523|Ga0115231_1000581	GUT_GENOME284001_2_65568	34437	Duplodnaviria;Heunggongvirae;Uroviricota;Caudoviricetes;Caudovirales	Viral database	Methanobacteriota	Methanobacteria	Methanobacteriales	Methanobacteriaceae	Methanobrevibacter_A	Methanobrevibacter_A smithii	VC_324_0	No	NA	High-quality	90.43	0		0.00157563	Yes
IMG|IMGVR_UViG_3300008725_000008|3300008725|Ga0115670_1000674	ERR710432.NODE_943_6498	40353	Duplodnaviria;Heunggongvirae;Uroviricota;Caudoviricetes;Caudovirales;Siphoviridae	Viral database	Methanobacteriota	Methanobacteria	Methanobacteriales	Methanobacteriaceae	Methanobrevibacter	Methanobrevibacter olleyae	VC_326_0	No	NA	High-quality	100	0		0.0178571	Yes
IMG|IMGVR_UViG_3300010278_000002|3300010278|Ga0129311_1000428	GUT_GENOME235230_27_63636	37893	Duplodnaviria;Heunggongvirae;Uroviricota;Caudoviricetes;Caudovirales	Viral database	Methanobacteriota	Methanobacteria	Methanobacteriales	Methanobacteriaceae	Methanobrevibacter_A	Methanobrevibacter_A smithii	VC_324_0	No	NA	High-quality	99.51	0		0.00052521	Yes
IMG|IMGVR_UViG_3300014028_000007|3300014028|Ga0117810_1000126	GUT_GENOME230857_21_44924	28894	Duplodnaviria;Heunggongvirae;Uroviricota;Caudoviricetes;Caudovirales	Viral database	Methanobacteriota	Methanobacteria	Methanobacteriales	Methanobacteriaceae	Methanobrevibacter_A	Methanobrevibacter_A smithii	VC_359_0	No	NA	Medium-quality	53.01	0		0.0236345	Yes
IMG|IMGVR_UViG_3300014040_000006|3300014040|Ga0117811_1000275	GUT_GENOME284001_2_69654	24255	Duplodnaviria;Heunggongvirae;Uroviricota;Caudoviricetes;Caudovirales	Viral database	Methanobacteriota	Methanobacteria	Methanobacteriales	Methanobacteriaceae	Methanobrevibacter_A	Methanobrevibacter_A smithii	Outlier	No	NA	Low-quality	42.03	0		0.00210084	Yes
IMG|IMGVR_UViG_3300021255_000120|3300021255|Ga0223825_12561298	GUT_GENOME263468_3_184068	44392	Duplodnaviria;Heunggongvirae;Uroviricota;Caudoviricetes;Caudovirales	Viral database	Methanobacteriota	Methanobacteria	Methanobacteriales	Methanobacteriaceae	Methanobrevibacter_A	Methanobrevibacter_A woesei	VC_390_0	No	NA	High-quality	100	0		0.0147059	Yes
IMG|IMGVR_UViG_3300021256_000170|3300021256|Ga0223826_10001368	GUT_GENOME263468_3_184068	42269	Duplodnaviria;Heunggongvirae;Uroviricota;Caudoviricetes;Caudovirales	Viral database	Methanobacteriota	Methanobacteria	Methanobacteriales	Methanobacteriaceae	Methanobrevibacter_A	Methanobrevibacter_A woesei	VC_390_0	No	NA	High-quality	95.22	0		0.0320378	Yes
IMG|IMGVR_UViG_3300021295_000003|3300021295|Ga0214522_1000017	GUT_GENOME266067_6_13617	104717	Duplodnaviria;Heunggongvirae;Uroviricota;Caudoviricetes;Caudovirales	Viral database	Methanobacteriota	Methanobacteria	Methanobacteriales	Methanobacteriaceae	Methanobrevibacter_A	Methanobrevibacter_A smithii	VC_391_0	No	NA	High-quality	100	0		0.0194328	Yes
IMG|IMGVR_UViG_3300021399_000238|3300021399|Ga0224415_10000710	GUT_GENOME263468_3_184068	44229	Duplodnaviria;Heunggongvirae;Uroviricota;Caudoviricetes;Caudovirales	Viral database	Methanobacteriota	Methanobacteria	Methanobacteriales	Methanobacteriaceae	Methanobrevibacter_A	Methanobrevibacter_A woesei	VC_390_0	No	NA	High-quality	99.63	0		0.00262605	Yes
IMG|IMGVR_UViG_3300021431_000443|3300021431|Ga0224423_10003143|5268-23100	GUT_GENOME263468_3_184068	17833	Duplodnaviria;Heunggongvirae;Uroviricota;Caudoviricetes;Caudovirales	Viral database	Methanobacteriota	Methanobacteria	Methanobacteriales	Methanobacteriaceae	Methanobrevibacter_A	Methanobrevibacter_A woesei	Outlier	No	NA	Low-quality	40.17	0		0.00630252	Yes
IMG|IMGVR_UViG_3300024299_000095|3300024299|Ga0233448_1001725	GUT_GENOME266067_6_13617	17327	Unassigned		Methanobacteriota	Methanobacteria	Methanobacteriales	Methanobacteriaceae	Methanobrevibacter_A	Methanobrevibacter_A smithii	Singleton	No	NA	Low-quality	14.67	0		0.019958	Yes
IMG|IMGVR_UViG_3300027976_000177|3300027976|Ga0209702_10003104	GUT_GENOME273630_25_14578	27060	Duplodnaviria;Heunggongvirae;Uroviricota;Caudoviricetes;Caudovirales;Myoviridae	Viral database	Methanobacteriota	Methanobacteria	Methanobacteriales	Methanobacteriaceae	Methanobrevibacter_A	Methanobrevibacter_A smithii	VC_109_0	No	NA	Medium-quality	67.89	0		0.0252101	Yes
IMG|IMGVR_UViG_3300028677_000147|3300028677|Ga0255346_1006347	GUT_GENOME194277_1_111607	11634	Duplodnaviria;Heunggongvirae;Uroviricota;Caudoviricetes;Caudovirales	Viral database	Methanobacteriota	Methanobacteria	Methanobacteriales	Methanobacteriaceae	Methanobrevibacter_A	Methanobrevibacter_A smithii	Singleton	No	NA	Low-quality	10.41	0		0.00157563	No
IMG|IMGVR_UViG_3300029380_000049|3300029380|Ga0243900_1002384|1-16382	GUT_GENOME273866_45_728	16382	Duplodnaviria;Heunggongvirae;Uroviricota;Caudoviricetes;Caudovirales	Viral database	Methanobacteriota	Methanobacteria	Methanobacteriales	Methanobacteriaceae	Methanobrevibacter_A	Methanobrevibacter_A smithii	Outlier	No	NA	Low-quality	43.02	0		0.00105042	Yes
IMG|IMGVR_UViG_3300029718_000038|3300029718|Ga0245237_1001780	GUT_GENOME256439_3_14691	17559	Duplodnaviria;Heunggongvirae;Uroviricota;Caudoviricetes;Caudovirales;Siphoviridae	Viral database	Methanobacteriota	Methanobacteria	Methanobacteriales	Methanobacteriaceae	Methanobrevibacter_A	Methanobrevibacter_A smithii	VC_326_0	No	NA	Low-quality	44.37	0		0.00315126	Yes
IMG|IMGVR_UViG_3300029852_000010|3300029852|Ga0245291_100449	CCIS33816588ST-4-0.NODE_150_68197	53772	Duplodnaviria;Heunggongvirae;Uroviricota;Caudoviricetes;Caudovirales	Viral database	Methanobacteriota	Methanobacteria	Methanobacteriales	Methanobacteriaceae	Methanobrevibacter_A	Methanobrevibacter_A smithii	VC_359_0	No	NA	High-quality	98.68	0		0.00052521	Yes
IMG|IMGVR_UViG_3300029871_000021|3300029871|Ga0245314_100772	ERR710432.NODE_943_6498	39740	Duplodnaviria;Heunggongvirae;Uroviricota;Caudoviricetes;Caudovirales;Siphoviridae	Viral database	Methanobacteriota	Methanobacteria	Methanobacteriales	Methanobacteriaceae	Methanobrevibacter	Methanobrevibacter olleyae	VC_326_0	No	NA	High-quality	100	0		0.00052521	Yes
IMG|IMGVR_UViG_3300029885_000006|3300029885|Ga0245329_100482|1171-40797	GUT_GENOME256439_3_14691	39627	Duplodnaviria;Heunggongvirae;Uroviricota;Caudoviricetes;Caudovirales	Viral database	Methanobacteriota	Methanobacteria	Methanobacteriales	Methanobacteriaceae	Methanobrevibacter_A	Methanobrevibacter_A smithii	VC_323_0	No	NA	Medium-quality	74.49	0		0.012605	Yes
IMG|IMGVR_UViG_3300031867_000166|3300031867|Ga0326511_10000297	GUT_GENOME267364_70_4602	42039	Unassigned		Methanobacteriota	Methanobacteria	Methanobacteriales	Methanobacteriaceae	Methanobrevibacter_A	Methanobrevibacter_A smithii	Outlier	No	NA	High-quality	98.93	0		0.0210084	Yes
IMG|NC_039061.1	GUT_GENOME102627_1_289476	2460	Monodnaviria;Shotokuvirae;Cressdnaviricota;Arfiviricetes;Cremevirales;Smacoviridae;Huchismacovirus;Human associated huchismacovirus 1	Viral database	Thermoplasmatota	Thermoplasmata	Methanomassiliicoccales	Methanomassiliicoccaceae	Methanomassiliicoccus_A	Methanomassiliicoccus_A intestinalis	VC_440_0	No	NA	High-quality	100	0		0.00157563	Yes
IMG|NC_039062.1	GUT_GENOME141221_1_930818	2471	Monodnaviria;Shotokuvirae;Cressdnaviricota;Arfiviricetes;Cremevirales;Smacoviridae;Huchismacovirus;Human associated huchismacovirus 2	Viral database	Thermoplasmatota	Thermoplasmata	Methanomassiliicoccales	Methanomassiliicoccaceae	Methanomassiliicoccus	Methanomassiliicoccus intestinalis	VC_439_0	No	NA	High-quality	100	0		0.0273109	Yes
IMG|NC_039063.1	GUT_GENOME141221_1_931559	2459	Monodnaviria;Shotokuvirae;Cressdnaviricota;Arfiviricetes;Cremevirales;Smacoviridae;Huchismacovirus;Human associated huchismacovirus 3	Viral database	Thermoplasmatota	Thermoplasmata	Methanomassiliicoccales	Methanomassiliicoccaceae	Methanomassiliicoccus	Methanomassiliicoccus intestinalis	VC_441_0	No	NA	High-quality	100	0		0.00105042	Yes
IMG|Norman_113_NODE_25_length_2504_cov_6.768477	GUT_GENOME141221_1_931761	2504	Monodnaviria;Shotokuvirae;Cressdnaviricota;Arfiviricetes;Cremevirales;Smacoviridae;Huchismacovirus;	Viral database	Thermoplasmatota	Thermoplasmata	Methanomassiliicoccales	Methanomassiliicoccaceae	Methanomassiliicoccus_A	Methanomassiliicoccus_A intestinalis	VC_440_0	No	NA	Complete	100	0		0.00052521	Yes
IMG|UGV-GENOME-0001201	GUT_GENOME141221_1_931761	2513	Monodnaviria;Shotokuvirae;Cressdnaviricota;Arfiviricetes;Cremevirales;Smacoviridae;Huchismacovirus;	Viral database	Thermoplasmatota	Thermoplasmata	Methanomassiliicoccales	Methanomassiliicoccaceae	Methanomassiliicoccus_A	Methanomassiliicoccus_A intestinalis	VC_440_0	No	NA	Complete	100	0		0.0231092	Yes
IMG|UGV-GENOME-0145846	ERR589775.NODE_71_18440	19964	Duplodnaviria;Heunggongvirae;Uroviricota;Caudoviricetes;Caudovirales	Viral database	Methanobacteriota	Methanobacteria	Methanobacteriales	Methanobacteriaceae	Methanobrevibacter_A	Methanobrevibacter_A smithii	Outlier	No	NA	Medium-quality	52.45	0		0.029937	Yes
IMG|UGV-GENOME-0179807_1	ERR589769.NODE_2060_700	23882	Duplodnaviria;Heunggongvirae;Uroviricota;Caudoviricetes;Caudovirales	Viral database	Thermoplasmatota	Thermoplasmata	Methanomassiliicoccales	Methanomethylophilaceae	UBA71	UBA71 sp006954465	VC_397_0	No	NA	Medium-quality	62.92	0		0.0257353	Yes
IMG|UGV-GENOME-0189063	GUT_GENOME284001_2_65568	26095	Duplodnaviria;Heunggongvirae;Uroviricota;Caudoviricetes;Caudovirales	Viral database	Methanobacteriota	Methanobacteria	Methanobacteriales	Methanobacteriaceae	Methanobrevibacter_A	Methanobrevibacter_A smithii	VC_324_0	No	NA	Medium-quality	68.55	0		0.00210084	Yes
IMG|UGV-GENOME-0200618	GUT_GENOME093033_16_27577	28073	Duplodnaviria;Heunggongvirae;Uroviricota;Caudoviricetes;Caudovirales	Viral database	Methanobacteriota	Methanobacteria	Methanobacteriales	Methanobacteriaceae	Methanobrevibacter_A	Methanobrevibacter_A smithii_A	VC_358_0	No	NA	Medium-quality	52.77	0		0.0152311	Yes
IMG|UGV-GENOME-0209861	GUT_GENOME235230_27_63636	29723	Duplodnaviria;Heunggongvirae;Uroviricota;Caudoviricetes;Caudovirales	Viral database	Methanobacteriota	Methanobacteria	Methanobacteriales	Methanobacteriaceae	Methanobrevibacter_A	Methanobrevibacter_A smithii	VC_324_0	No	NA	Medium-quality	78.04	0		0.00157563	Yes
IMG|UGV-GENOME-0226971	GUT_GENOME092034_2_102135	32743	Duplodnaviria;Heunggongvirae;Uroviricota;Caudoviricetes;Caudovirales	Viral database	Methanobacteriota	Methanobacteria	Methanobacteriales	Methanobacteriaceae	Methanobrevibacter_A	Methanobrevibacter_A smithii_A	VC_358_0	No	NA	Medium-quality	61.55	0		0.00630252	Yes
IMG|UGV-GENOME-0228900	GUT_GENOME058005_1_18148	33099	Duplodnaviria;Heunggongvirae;Uroviricota;Caudoviricetes;Caudovirales	Viral database	Methanobacteriota	Methanobacteria	Methanobacteriales	Methanobacteriaceae	Methanobrevibacter_A	Methanobrevibacter_A smithii	VC_358_0	No	NA	Medium-quality	62.22	0		0.00052521	Yes
IMG|UGV-GENOME-0231656	GUT_GENOME235230_27_63636	33647	Duplodnaviria;Heunggongvirae;Uroviricota;Caudoviricetes;Caudovirales	Viral database	Methanobacteriota	Methanobacteria	Methanobacteriales	Methanobacteriaceae	Methanobrevibacter_A	Methanobrevibacter_A smithii	VC_324_0	No	NA	Medium-quality	88.37	0		0.00052521	Yes
IMG|UGV-GENOME-0239406	GUT_GENOME093513_2_107737	35137	Duplodnaviria;Heunggongvirae;Uroviricota;Caudoviricetes;Caudovirales	Viral database	Methanobacteriota	Methanobacteria	Methanobacteriales	Methanobacteriaceae	Methanobrevibacter_A	Methanobrevibacter_A smithii	VC_359_0	No	NA	Medium-quality	64.52	0		0.00105042	Yes
IMG|UGV-GENOME-0240165	GUT_GENOME235230_27_63636	35249	Duplodnaviria;Heunggongvirae;Uroviricota;Caudoviricetes;Caudovirales	Viral database	Methanobacteriota	Methanobacteria	Methanobacteriales	Methanobacteriaceae	Methanobrevibacter_A	Methanobrevibacter_A smithii	VC_324_0	No	NA	High-quality	92.54	0		0	Yes
IMG|UGV-GENOME-0255461	GUT_GENOME235230_27_63636	37669	Duplodnaviria;Heunggongvirae;Uroviricota;Caudoviricetes;Caudovirales	Viral database	Methanobacteriota	Methanobacteria	Methanobacteriales	Methanobacteriaceae	Methanobrevibacter_A	Methanobrevibacter_A smithii	VC_324_0	No	NA	High-quality	98.91	0		0.0267857	Yes
IMG|UGV-GENOME-0255724	GUT_GENOME273866_45_728	37711	Duplodnaviria;Heunggongvirae;Uroviricota;Caudoviricetes;Caudovirales	Viral database	Methanobacteriota	Methanobacteria	Methanobacteriales	Methanobacteriaceae	Methanobrevibacter_A	Methanobrevibacter_A smithii	VC_324_0	No	NA	High-quality	98.97	0		0.0152311	Yes
IMG|UGV-GENOME-0256087	GUT_GENOME235230_27_63636	37773	Duplodnaviria;Heunggongvirae;Uroviricota;Caudoviricetes;Caudovirales	Viral database	Methanobacteriota	Methanobacteria	Methanobacteriales	Methanobacteriaceae	Methanobrevibacter_A	Methanobrevibacter_A smithii	VC_324_0	No	NA	Complete	100	0		0.00262605	Yes
IMG|UGV-GENOME-0256185	GUT_GENOME235230_27_63636	37793	Duplodnaviria;Heunggongvirae;Uroviricota;Caudoviricetes;Caudovirales	Viral database	Methanobacteriota	Methanobacteria	Methanobacteriales	Methanobacteriaceae	Methanobrevibacter_A	Methanobrevibacter_A smithii	VC_324_0	No	NA	High-quality	99.23	0		0.0231092	Yes
IMG|UGV-GENOME-0257216	CCIS38765456ST-20-0.NODE_125_97436	37965	Duplodnaviria;Heunggongvirae;Uroviricota;Caudoviricetes;Caudovirales	Viral database	Methanobacteriota	Methanobacteria	Methanobacteriales	Methanobacteriaceae	Methanobrevibacter_A	Methanobrevibacter_A smithii	VC_324_0	No	NA	Complete	100	0		0.0152311	Yes
IMG|UGV-GENOME-0257348	GUT_GENOME235230_27_63636	37991	Duplodnaviria;Heunggongvirae;Uroviricota;Caudoviricetes;Caudovirales	Viral database	Methanobacteriota	Methanobacteria	Methanobacteriales	Methanobacteriaceae	Methanobrevibacter_A	Methanobrevibacter_A smithii	VC_324_0	No	NA	Complete	100	0		0.0194328	Yes
IMG|UGV-GENOME-0257711	GUT_GENOME235230_27_63636	38056	Duplodnaviria;Heunggongvirae;Uroviricota;Caudoviricetes;Caudovirales	Viral database	Methanobacteriota	Methanobacteria	Methanobacteriales	Methanobacteriaceae	Methanobrevibacter_A	Methanobrevibacter_A smithii	VC_324_0	No	NA	Complete	100	0		0.0267857	Yes
IMG|UGV-GENOME-0258495	GUT_GENOME256439_3_14691	38181	Duplodnaviria;Heunggongvirae;Uroviricota;Caudoviricetes;Caudovirales	Viral database	Methanobacteriota	Methanobacteria	Methanobacteriales	Methanobacteriaceae	Methanobrevibacter_A	Methanobrevibacter_A smithii	VC_324_0	No	NA	Complete	100	0		0.0194328	Yes
IMG|UGV-GENOME-0260234	GUT_GENOME235230_27_63636	38488	Duplodnaviria;Heunggongvirae;Uroviricota;Caudoviricetes;Caudovirales	Viral database	Methanobacteriota	Methanobacteria	Methanobacteriales	Methanobacteriaceae	Methanobrevibacter_A	Methanobrevibacter_A smithii	VC_324_0	No	NA	Complete	100	0		0.0210084	Yes
IMG|UGV-GENOME-0260310	GUT_GENOME273866_45_728	38502	Duplodnaviria;Heunggongvirae;Uroviricota;Caudoviricetes;Caudovirales	Viral database	Methanobacteriota	Methanobacteria	Methanobacteriales	Methanobacteriaceae	Methanobrevibacter_A	Methanobrevibacter_A smithii	VC_324_0	No	NA	High-quality	100	0		0.00052521	Yes
IMG|UGV-GENOME-0262162	GUT_GENOME235230_27_63636	38835	Duplodnaviria;Heunggongvirae;Uroviricota;Caudoviricetes;Caudovirales	Viral database	Methanobacteriota	Methanobacteria	Methanobacteriales	Methanobacteriaceae	Methanobrevibacter_A	Methanobrevibacter_A smithii	VC_324_0	No	NA	Complete	100	0		0	Yes
IMG|UGV-GENOME-0262696_1	GUT_GENOME256439_3_14691	37497	Duplodnaviria;Heunggongvirae;Uroviricota;Caudoviricetes;Caudovirales	Viral database	Methanobacteriota	Methanobacteria	Methanobacteriales	Methanobacteriaceae	Methanobrevibacter_A	Methanobrevibacter_A smithii	VC_324_0	No	NA	High-quality	98.48	0		0.00105042	Yes
IMG|UGV-GENOME-0263128	GUT_GENOME268814_20_603	39002	Duplodnaviria;Heunggongvirae;Uroviricota;Caudoviricetes;Caudovirales	Viral database	Methanobacteriota	Methanobacteria	Methanobacteriales	Methanobacteriaceae	Methanobrevibacter_A	Methanobrevibacter_A smithii	VC_324_0	No	NA	High-quality	100	0		0.107668	Yes
IMG|UGV-GENOME-0264490	GUT_GENOME093679_1_86251	39240	Duplodnaviria;Heunggongvirae;Uroviricota;Caudoviricetes;Caudovirales	Viral database	Methanobacteriota	Methanobacteria	Methanobacteriales	Methanobacteriaceae	Methanobrevibacter_A	Methanobrevibacter_A smithii	Outlier	No	NA	Low-quality	31.41	0		0.0178571	Yes
IMG|UGV-GENOME-0264891	GUT_GENOME235230_27_63636	39308	Duplodnaviria;Heunggongvirae;Uroviricota;Caudoviricetes;Caudovirales	Viral database	Methanobacteriota	Methanobacteria	Methanobacteriales	Methanobacteriaceae	Methanobrevibacter_A	Methanobrevibacter_A smithii	VC_324_0	No	NA	High-quality	100	0		0	Yes
IMG|UGV-GENOME-0266066	GUT_GENOME256439_3_14691	39521	Duplodnaviria;Heunggongvirae;Uroviricota;Caudoviricetes;Caudovirales	Viral database	Methanobacteriota	Methanobacteria	Methanobacteriales	Methanobacteriaceae	Methanobrevibacter_A	Methanobrevibacter_A smithii	VC_324_0	No	NA	High-quality	100	0		0.00735294	Yes
IMG|UGV-GENOME-0268635_1	GUT_GENOME235230_27_63636	35662	Duplodnaviria;Heunggongvirae;Uroviricota;Caudoviricetes;Caudovirales	Viral database	Methanobacteriota	Methanobacteria	Methanobacteriales	Methanobacteriaceae	Methanobrevibacter_A	Methanobrevibacter_A smithii	VC_324_0	No	NA	High-quality	93.63	0		0.0241597	Yes
IMG|UGV-GENOME-0271153	GUT_GENOME218694_90_4917	40511	Duplodnaviria;Heunggongvirae;Uroviricota;Caudoviricetes;Caudovirales	Viral database	Methanobacteriota	Methanobacteria	Methanobacteriales	Methanobacteriaceae	Methanobrevibacter_A	Methanobrevibacter_A smithii	VC_323_0	No	NA	Medium-quality	76.15	0		0.721639	Yes
IMG|UGV-GENOME-0271425	GUT_GENOME230857_21_44924	40564	Duplodnaviria;Heunggongvirae;Uroviricota;Caudoviricetes;Caudovirales	Viral database	Methanobacteriota	Methanobacteria	Methanobacteriales	Methanobacteriaceae	Methanobrevibacter_A	Methanobrevibacter_A smithii	VC_359_0	No	NA	Medium-quality	74.44	0		0.0267857	Yes
IMG|UGV-GENOME-0271646	GUT_GENOME218694_90_4917	40607	Duplodnaviria;Heunggongvirae;Uroviricota;Caudoviricetes;Caudovirales	Viral database	Methanobacteriota	Methanobacteria	Methanobacteriales	Methanobacteriaceae	Methanobrevibacter_A	Methanobrevibacter_A smithii	VC_323_0	No	NA	Medium-quality	76.33	0		0.00577731	Yes
IMG|UGV-GENOME-0274814	GUT_GENOME273866_45_728	41194	Duplodnaviria;Heunggongvirae;Uroviricota;Caudoviricetes;Caudovirales	Viral database	Methanobacteriota	Methanobacteria	Methanobacteriales	Methanobacteriaceae	Methanobrevibacter_A	Methanobrevibacter_A smithii	VC_324_0	No	NA	High-quality	100	0		0.0173319	Yes
IMG|UGV-GENOME-0303866	GUT_GENOME230857_21_44924	47815	Duplodnaviria;Heunggongvirae;Uroviricota;Caudoviricetes;Caudovirales	Viral database	Methanobacteriota	Methanobacteria	Methanobacteriales	Methanobacteriaceae	Methanobrevibacter_A	Methanobrevibacter_A smithii	VC_359_0	No	NA	Medium-quality	87.74	0		0.0346639	Yes
IMG|UGV-GENOME-0309168	GUT_GENOME218694_90_4917	49612	Duplodnaviria;Heunggongvirae;Uroviricota;Caudoviricetes;Caudovirales	Viral database	Methanobacteriota	Methanobacteria	Methanobacteriales	Methanobacteriaceae	Methanobrevibacter_A	Methanobrevibacter_A smithii	VC_323_0	No	NA	High-quality	100	0		0.0215336	Yes
IMG|UGV-GENOME-0313195	GUT_GENOME230857_21_44924	51116	Duplodnaviria;Heunggongvirae;Uroviricota;Caudoviricetes;Caudovirales	Viral database	Methanobacteriota	Methanobacteria	Methanobacteriales	Methanobacteriaceae	Methanobrevibacter_A	Methanobrevibacter_A smithii	VC_359_0	No	NA	High-quality	93.78	0		0	Yes
IMG|UGV-GENOME-0318191	GUT_GENOME266751_6_17485	53299	Duplodnaviria;Heunggongvirae;Uroviricota;Caudoviricetes;Caudovirales	Viral database	Methanobacteriota	Methanobacteria	Methanobacteriales	Methanobacteriaceae	Methanobrevibacter_A	Methanobrevibacter_A smithii	VC_358_0	No	NA	Complete	100	0		0.0189076	Yes
IMG|UGV-GENOME-0318983	GUT_GENOME230857_21_44924	53669	Duplodnaviria;Heunggongvirae;Uroviricota;Caudoviricetes;Caudovirales	Viral database	Methanobacteriota	Methanobacteria	Methanobacteriales	Methanobacteriaceae	Methanobrevibacter_A	Methanobrevibacter_A smithii	VC_359_0	No	NA	Complete	100	0		0.0215336	Yes
IMG|UGV-GENOME-0320937_1	GUT_GENOME230857_21_44924	52249	Duplodnaviria;Heunggongvirae;Uroviricota;Caudoviricetes;Caudovirales	Viral database	Methanobacteriota	Methanobacteria	Methanobacteriales	Methanobacteriaceae	Methanobrevibacter_A	Methanobrevibacter_A smithii	VC_359_0	No	NA	High-quality	95.92	0		0.0252101	Yes
IMG|UGV-GENOME-0327529	GUT_GENOME284001_2_69654	57783	Duplodnaviria;Heunggongvirae;Uroviricota;Caudoviricetes;Caudovirales	Viral database	Methanobacteriota	Methanobacteria	Methanobacteriales	Methanobacteriaceae	Methanobrevibacter_A	Methanobrevibacter_A smithii	VC_370_0	No	NA	Complete	100	0		0.00052521	Yes
IMG|UGV-GENOME-0334155_1	GUT_GENOME143494_1_1094342	51956	Duplodnaviria;Heunggongvirae;Uroviricota;Caudoviricetes;Caudovirales	Viral database	Methanobacteriota	Methanobacteria	Methanobacteriales	Methanobacteriaceae	Methanosphaera	Methanosphaera stadtmanae	Overlap (VC_326/VC_392)	No	NA	Medium-quality	53.86	0		0.00210084	Yes
IMG|UGV-GENOME-0354002	ERR688627.NODE_870_18087	83021	Duplodnaviria;Heunggongvirae;Uroviricota;Caudoviricetes;Caudovirales	Viral database	Methanobacteriota	Methanobacteria	Methanobacteriales	Methanobacteriaceae	Methanobrevibacter_A	Methanobrevibacter_A smithii	Overlap (VC_326/VC_392)	No	NA	Medium-quality	71.85	0		0.0330882	Yes
IMG|UGV-GENOME-0373642	CCIS81710917ST-20-0.NODE_1493_14747	131466	Duplodnaviria;Heunggongvirae;Uroviricota;Caudoviricetes;Caudovirales	Viral database	Methanobacteriota	Methanobacteria	Methanobacteriales	Methanobacteriaceae	Methanobrevibacter_A	Methanobrevibacter_A smithii	VC_392_0	No	NA	High-quality	90.53	0		0.00157563	Yes
IMG|UGV-GENOME-0374504	CCIS81710917ST-20-0.NODE_1493_14747	138976	Duplodnaviria;Heunggongvirae;Uroviricota;Caudoviricetes;Caudovirales	Viral database	Methanobacteriota	Methanobacteria	Methanobacteriales	Methanobacteriaceae	Methanobrevibacter_A	Methanobrevibacter_A smithii	VC_392_0	No	NA	High-quality	95.7	0		0.0183824	Yes
IMG|UGV-GENOME-0375013	CCIS81710917ST-20-0.NODE_1493_14747	143197	Duplodnaviria;Heunggongvirae;Uroviricota;Caudoviricetes;Caudovirales	Viral database	Methanobacteriota	Methanobacteria	Methanobacteriales	Methanobacteriaceae	Methanobrevibacter_A	Methanobrevibacter_A smithii	VC_392_0	No	NA	High-quality	98.61	0		0.00052521	Yes
IMG|UGV-GENOME-2640363	GUT_GENOME141221_1_930616	2048	Monodnaviria;Shotokuvirae;Cressdnaviricota;Arfiviricetes;Cremevirales;Smacoviridae	Viral database	Thermoplasmatota	Thermoplasmata	Methanomassiliicoccales	Methanomassiliicoccaceae	Methanomassiliicoccus	Methanomassiliicoccus intestinalis	VC_441_0	No	NA	Medium-quality	83.34	0		0.0189076	No
IMG|UGV-GENOME-2871376	GUT_GENOME141221_1_931559	2373	Monodnaviria;Shotokuvirae;Cressdnaviricota;Arfiviricetes;Cremevirales;Smacoviridae;Huchismacovirus;	Viral database	Thermoplasmatota	Thermoplasmata	Methanomassiliicoccales	Methanomassiliicoccaceae	Methanomassiliicoccus	Methanomassiliicoccus intestinalis	VC_441_0	No	NA	High-quality	96.6	0		0.0262605	No
IMG|UGV-GENOME-4414252	CCIS38765456ST-20-0.NODE_125_97436	37941	Duplodnaviria;Heunggongvirae;Uroviricota;Caudoviricetes;Caudovirales	Viral database	Methanobacteriota	Methanobacteria	Methanobacteriales	Methanobacteriaceae	Methanobrevibacter_A	Methanobrevibacter_A smithii	VC_324_0	No	NA	Complete	100	0		0.0262605	Yes
IMG|UGV-GENOME-4415077	GUT_GENOME273866_45_728	38620	Duplodnaviria;Heunggongvirae;Uroviricota;Caudoviricetes;Caudovirales	Viral database	Methanobacteriota	Methanobacteria	Methanobacteriales	Methanobacteriaceae	Methanobrevibacter_A	Methanobrevibacter_A smithii	VC_324_0	No	NA	Complete	100	0		0.00262605	Yes
IMG|UGV-GENOME-4415268	GUT_GENOME235230_27_63636	38766	Duplodnaviria;Heunggongvirae;Uroviricota;Caudoviricetes;Caudovirales	Viral database	Methanobacteriota	Methanobacteria	Methanobacteriales	Methanobacteriaceae	Methanobrevibacter_A	Methanobrevibacter_A smithii	VC_324_0	No	NA	High-quality	100	0		0.0246849	Yes
IMG|UGV-GENOME-4426261	GUT_GENOME266751_6_17485	53255	Duplodnaviria;Heunggongvirae;Uroviricota;Caudoviricetes;Caudovirales	Viral database	Methanobacteriota	Methanobacteria	Methanobacteriales	Methanobacteriaceae	Methanobrevibacter_A	Methanobrevibacter_A smithii	VC_358_0	No	NA	Complete	100	0		0.00052521	Yes
IMG|Yinda_HP22_trimmed_NODE_10_length_49556_cov_108.480657	CCIS81710917ST-20-0.NODE_1493_19002	49556	Duplodnaviria;Heunggongvirae;Uroviricota;Caudoviricetes;Caudovirales	Viral database	Methanobacteriota	Methanobacteria	Methanobacteriales	Methanobacteriaceae	Methanobrevibacter_A	Methanobrevibacter_A smithii	VC_359_0	No	NA	High-quality	90.95	0		0.0257353	Yes
Li_JH_2014_NBT_MH0315_101102.NODE_138753_269	GUT_GENOME273866_45_728	269	Unassigned		Methanobacteriota	Methanobacteria	Methanobacteriales	Methanobacteriaceae	Methanobrevibacter_A	Methanobrevibacter_A smithii	VC_457_0	No	NA	Low-quality	0.71	0	Danish	0.00052521	Yes
Li_JH_2014_NBT_V1.FI04_110822.NODE_465562_5335	GUT_GENOME268814_20_603	5335	Unassigned		Methanobacteriota	Methanobacteria	Methanobacteriales	Methanobacteriaceae	Methanobrevibacter_A	Methanobrevibacter_A smithii	VC_384_0	No	NA	Low-quality	13.98	0	Spanish	0	No
Li_JH_2014_NBT_V1.FI04_110822.NODE_466216_6511	GUT_GENOME143185_16_1306	6511	Unassigned		Methanobacteriota	Methanobacteria	Methanobacteriales	Methanobacteriaceae	Methanobrevibacter_A	Methanobrevibacter_A smithii_A	VC_369_0	No	NA	Not-determined	NA	0	Spanish	0.00630252	No
Li_JH_2014_NBT_V1.FI14_110821.NODE_594676_998	CCIS07539127ST-4-0.NODE_11245_229	998	Unassigned		Methanobacteriota	Methanobacteria	Methanobacteriales	Methanobacteriaceae	Methanobrevibacter_A	Methanobrevibacter_A smithii	Outlier	No	NA	Low-quality	2.58	0	Spanish	0	Yes
Li_JH_2014_NBT_V1.FI14_110821.NODE_619234_5251	GUT_GENOME255326_11_31161	5251	Unassigned		Methanobacteriota	Methanobacteria	Methanobacteriales	Methanobacteriaceae	Methanobrevibacter_A	Methanobrevibacter_A smithii	Singleton	No	NA	Not-determined	NA	0	Spanish	0.0288866	No
provir|Feng_Q_2015_NC_ERR688524.NODE_217_70347_1	ERR710432.NODE_943_6498	70347	Duplodnaviria;Heunggongvirae;Uroviricota;Caudoviricetes;Caudovirales;Siphoviridae	Viral database	Methanobacteriota	Methanobacteria	Methanobacteriales	Methanobacteriaceae	Methanobrevibacter	Methanobrevibacter olleyae	VC_326_0	Yes	37605	High-quality	94.94	46.54	Austria	0	Yes
provir|Feng_Q_2015_NC_ERR688567.NODE_108_91642_1	GUT_GENOME218694_90_4917	91642	Duplodnaviria;Heunggongvirae;Uroviricota;Caudoviricetes;Caudovirales	Viral database	Methanobacteriota	Methanobacteria	Methanobacteriales	Methanobacteriaceae	Methanobrevibacter_A	Methanobrevibacter_A smithii	VC_323_0	Yes	41525	Complete	100	54.69	Austria	0.0336134	Yes
provir|Feng_Q_2015_NC_ERR688569.NODE_705_30024_1	GUT_GENOME268814_20_603	30024	Duplodnaviria;Heunggongvirae;Uroviricota;Caudoviricetes;Caudovirales	Eggnog markers	Methanobacteriota	Methanobacteria	Methanobacteriales	Methanobacteriaceae	Methanobrevibacter_A	Methanobrevibacter_A smithii	Outlier	Yes	11896	Low-quality	16.65	60.38	Austria	0.00052521	Yes
provir|Feng_Q_2015_NC_ERR688580.NODE_36_141307_1	GUT_GENOME266751_6_17485	141307	Duplodnaviria;Heunggongvirae;Uroviricota;Caudoviricetes;Caudovirales	Viral database	Methanobacteriota	Methanobacteria	Methanobacteriales	Methanobacteriaceae	Methanobrevibacter_A	Methanobrevibacter_A smithii	VC_323_0	Yes	43980	Complete	100	68.88	Austria	0.00315126	Yes
provir|Feng_Q_2015_NC_ERR688592.NODE_737_34158_1	GUT_GENOME094374_1_66231	34158	Duplodnaviria;Heunggongvirae;Uroviricota;Caudoviricetes;Caudovirales	Eggnog markers	Methanobacteriota	Methanobacteria	Methanobacteriales	Methanobacteriaceae	Methanobrevibacter_A	Methanobrevibacter_A smithii	Outlier	Yes	19075	Medium-quality	50.09	44.16	Austria	0.0231092	Yes
provir|Feng_Q_2015_NC_ERR688605.NODE_81_93248_1	ERR710432.NODE_943_6498	93248	Duplodnaviria;Heunggongvirae;Uroviricota;Caudoviricetes;Caudovirales;Siphoviridae	Viral database	Methanobacteriota	Methanobacteria	Methanobacteriales	Methanobacteriaceae	Methanobrevibacter	Methanobrevibacter olleyae	VC_326_0	Yes	36984	Complete	100	60.34	Austria	0.00892857	Yes
provir|Feng_Q_2015_NC_ERR688611.NODE_45_142494_1	37101.scaffold36606_2_2530	142494	Duplodnaviria;Heunggongvirae;Uroviricota;Caudoviricetes;Caudovirales	Viral database	Methanobacteriota	Methanobacteria	Methanobacteriales	Methanobacteriaceae	Methanobrevibacter_A	Methanobrevibacter_A smithii	VC_358_0	Yes	46906	Complete	100	67.08	Austria	0.0262605	Yes
provir|Feng_Q_2015_NC_ERR688623.NODE_3231_8370_1	GUT_GENOME269323_6_1120	8370	Unassigned		Methanobacteriota	Methanobacteria	Methanobacteriales	Methanobacteriaceae	Methanobrevibacter_A	Methanobrevibacter_A smithii	VC_511_0	Yes	4636	Low-quality	11.73	44.61	Austria	0.0304622	Yes
provir|Feng_Q_2015_NC_ERR688626.NODE_64_124065_1	GUT_GENOME273866_45_728	124065	Duplodnaviria;Heunggongvirae;Uroviricota;Caudoviricetes;Caudovirales	Viral database	Methanobacteriota	Methanobacteria	Methanobacteriales	Methanobacteriaceae	Methanobrevibacter_A	Methanobrevibacter_A smithii	VC_323_0	Yes	27286	Medium-quality	62.57	78.01	Austria	0.00105042	Yes
provir|GPD|uvig_185885_1	GUT_GENOME218694_90_4917	135329	Duplodnaviria;Heunggongvirae;Uroviricota;Caudoviricetes;Caudovirales	Viral database	Methanobacteriota	Methanobacteria	Methanobacteriales	Methanobacteriaceae	Methanobrevibacter_A	Methanobrevibacter_A smithii	VC_323_0	Yes	52302	High-quality	100	61.35	United Kingdom,United States	0.00105042	Yes
provir|GPD|uvig_186262_1	GUT_GENOME230857_21_44924	65833	Duplodnaviria;Heunggongvirae;Uroviricota;Caudoviricetes;Caudovirales	Viral database	Methanobacteriota	Methanobacteria	Methanobacteriales	Methanobacteriaceae	Methanobrevibacter_A	Methanobrevibacter_A smithii	VC_359_0	Yes	34062	Medium-quality	62.49	48.26	Netherlands,United Kingdom	0.0194328	Yes
provir|GPD|uvig_188825_1	GUT_GENOME235230_27_63636	58815	Duplodnaviria;Heunggongvirae;Uroviricota;Caudoviricetes;Caudovirales	Viral database	Methanobacteriota	Methanobacteria	Methanobacteriales	Methanobacteriaceae	Methanobrevibacter_A	Methanobrevibacter_A smithii	VC_324_0	Yes	26797	Medium-quality	70.38	54.44	Netherlands,Sweden,United Kingdom	0.0346639	Yes
provir|GPD|uvig_19970_1	ERR710432.NODE_943_6498	96570	Duplodnaviria;Heunggongvirae;Uroviricota;Caudoviricetes;Caudovirales;Siphoviridae	Viral database	Methanobacteriota	Methanobacteria	Methanobacteriales	Methanobacteriaceae	Methanobrevibacter	Methanobrevibacter olleyae	VC_326_0	Yes	35686	High-quality	90.27	63.05	Spain,Spain	0.00052521	Yes
provir|GPD|uvig_205826_1	GUT_GENOME230857_21_44924	59576	Duplodnaviria;Heunggongvirae;Uroviricota;Caudoviricetes;Caudovirales	Viral database	Methanobacteriota	Methanobacteria	Methanobacteriales	Methanobacteriaceae	Methanobrevibacter_A	Methanobrevibacter_A smithii	VC_359_0	Yes	35671	Medium-quality	74.77	40.13	United Kingdom	0.022584	Yes
provir|GPD|uvig_205826_2	GUT_GENOME230857_21_44924	59576	Duplodnaviria;Heunggongvirae;Uroviricota;Caudoviricetes;Caudovirales;Siphoviridae	Viral database	Methanobacteriota	Methanobacteria	Methanobacteriales	Methanobacteriaceae	Methanobrevibacter_A	Methanobrevibacter_A smithii	VC_326_0	Yes	35671	Medium-quality	74.77	40.13	United Kingdom	0.022584	Yes
provir|GPD|uvig_222260_1	GUT_GENOME273866_45_728	50659	Duplodnaviria;Heunggongvirae;Uroviricota;Caudoviricetes;Caudovirales	Viral database	Methanobacteriota	Methanobacteria	Methanobacteriales	Methanobacteriaceae	Methanobrevibacter_A	Methanobrevibacter_A smithii	VC_324_0	Yes	40005	High-quality	100	21.03	China	0.00210084	Yes
provir|GPD|uvig_268865_1	GUT_GENOME218694_90_4917	40773	Duplodnaviria;Heunggongvirae;Uroviricota;Caudoviricetes;Caudovirales	Viral database	Methanobacteriota	Methanobacteria	Methanobacteriales	Methanobacteriaceae	Methanobrevibacter_A	Methanobrevibacter_A smithii	VC_323_0	Yes	34898	Medium-quality	65.6	14.41	United States	0.0120798	Yes
provir|GPD|uvig_310929_1	GUT_GENOME093513_2_107737	71681	Duplodnaviria;Heunggongvirae;Uroviricota;Caudoviricetes;Caudovirales	Viral database	Methanobacteriota	Methanobacteria	Methanobacteriales	Methanobacteriaceae	Methanobrevibacter_A	Methanobrevibacter_A smithii	VC_359_0	Yes	21511	Low-quality	39.45	69.99	China	0	Yes
provir|GPD|uvig_337728_1	GUT_GENOME235230_27_63636	39364	Duplodnaviria;Heunggongvirae;Uroviricota;Caudoviricetes;Caudovirales	Viral database	Methanobacteriota	Methanobacteria	Methanobacteriales	Methanobacteriaceae	Methanobrevibacter_A	Methanobrevibacter_A smithii	VC_324_0	Yes	32437	Medium-quality	85.18	17.6	Sweden	0.0262605	Yes
provir|GPD|uvig_364876_1	GUT_GENOME257377_3_110189	50517	Duplodnaviria;Heunggongvirae;Uroviricota;Caudoviricetes;Caudovirales	Viral database	Methanobacteriota	Methanobacteria	Methanobacteriales	Methanobacteriaceae	Methanobrevibacter_A	Methanobrevibacter_A smithii	VC_358_0	Yes	49469	High-quality	92.99	2.07	Peru	0.00052521	Yes
provir|GPD|uvig_382937_1	GUT_GENOME235230_27_63636	107873	Duplodnaviria;Heunggongvirae;Uroviricota;Caudoviricetes;Caudovirales	Viral database	Methanobacteriota	Methanobacteria	Methanobacteriales	Methanobacteriaceae	Methanobrevibacter_A	Methanobrevibacter_A smithii	VC_324_0	Yes	37941	High-quality	99.61	64.83	United States	0.00052521	Yes
provir|GPD|uvig_390321_1	GUT_GENOME284001_2_69654	61474	Duplodnaviria;Heunggongvirae;Uroviricota;Caudoviricetes;Caudovirales	Viral database	Methanobacteriota	Methanobacteria	Methanobacteriales	Methanobacteriaceae	Methanobrevibacter_A	Methanobrevibacter_A smithii	VC_370_0	Yes	55331	High-quality	95.89	9.99	Sweden,United States	0.0120798	Yes
provir|GPD|uvig_432794_1	GUT_GENOME266751_6_17485	74485	Unassigned		Methanobacteriota	Methanobacteria	Methanobacteriales	Methanobacteriaceae	Methanobrevibacter_A	Methanobrevibacter_A smithii	VC_385_0	Yes	7394	Low-quality	13.9	90.07	Peru,United States,United States,Netherlands,Peru,United States,United States,United States,United States,United States,Peru,Peru,United States	0.00052521	Yes
provir|GPD|uvig_543447_1	GUT_GENOME261695_15_32706	92874	Duplodnaviria;Heunggongvirae;Uroviricota;Caudoviricetes;Caudovirales	Viral database	Methanobacteriota	Methanobacteria	Methanobacteriales	Methanobacteriaceae	Methanobrevibacter_A	Methanobrevibacter_A smithii	VC_370_0	Yes	46066	Medium-quality	79.83	50.4	United States	0.00262605	Yes
provir|GPD|uvig_546929_1	ERR710432.NODE_943_6498	45932	Duplodnaviria;Heunggongvirae;Uroviricota;Caudoviricetes;Caudovirales;Siphoviridae	Viral database	Methanobacteriota	Methanobacteria	Methanobacteriales	Methanobacteriaceae	Methanobrevibacter	Methanobrevibacter olleyae	VC_326_0	Yes	39783	High-quality	100	13.39	Spain	0.085084	Yes
provir|GPD|uvig_548316_1	ERR710432.NODE_943_6498	39281	Duplodnaviria;Heunggongvirae;Uroviricota;Caudoviricetes;Caudovirales;Siphoviridae	Viral database	Methanobacteriota	Methanobacteria	Methanobacteriales	Methanobacteriaceae	Methanobrevibacter	Methanobrevibacter olleyae	VC_326_0	Yes	31599	Medium-quality	79.9	19.56	Spain	0.00262605	Yes
provir|GPD|uvig_76619_1	GUT_GENOME256439_3_14691	45608	Duplodnaviria;Heunggongvirae;Uroviricota;Caudoviricetes;Caudovirales	Viral database	Methanobacteriota	Methanobacteria	Methanobacteriales	Methanobacteriaceae	Methanobrevibacter_A	Methanobrevibacter_A smithii	VC_324_0	Yes	38969	High-quality	100	14.56	Spain	0	Yes
provir|HMP.159268001.contig46714_28491_1	GUT_GENOME143494_1_492215	28491	Duplodnaviria;Heunggongvirae;Uroviricota;Caudoviricetes;Caudovirales	Eggnog markers	Methanobacteriota	Methanobacteria	Methanobacteriales	Methanobacteriaceae	Methanosphaera	Methanosphaera stadtmanae	Outlier	Yes	9213	Low-quality	19.76	67.66	America	0.00052521	Yes
provir|HMP.SRS148196.contig8874_3221_1	GUT_GENOME273866_45_728	3221	Unassigned		Methanobacteriota	Methanobacteria	Methanobacteriales	Methanobacteriaceae	Methanobrevibacter_A	Methanobrevibacter_A smithii	Outlier	Yes	1956	Low-quality	5.07	39.27	America	0.00052521	Yes
provir|Rampelli_S_2020_mSystems_SRR9654991.NODE_109_100313_1	GUT_GENOME093513_2_107737	100313	Duplodnaviria;Heunggongvirae;Uroviricota;Caudoviricetes;Caudovirales	Viral database	Methanobacteriota	Methanobacteria	Methanobacteriales	Methanobacteriaceae	Methanobrevibacter_A	Methanobrevibacter_A smithii	VC_359_0	Yes	34669	Medium-quality	63.63	65.44	Italy	0.00157563	Yes
provir|Rampelli_S_2020_mSystems_SRR9654999.NODE_52_92916_1	CCIS38765456ST-20-0.NODE_125_97436	92916	Duplodnaviria;Heunggongvirae;Uroviricota;Caudoviricetes;Caudovirales	Viral database	Methanobacteriota	Methanobacteria	Methanobacteriales	Methanobacteriaceae	Methanobrevibacter_A	Methanobrevibacter_A smithii	VC_324_0	Yes	33284	Complete	100	64.18	Italy	0.00052521	Yes
provir|Rampelli_S_2020_mSystems_SRR9655014.NODE_14_242848_1	GUT_GENOME284001_2_69654	242848	Duplodnaviria;Heunggongvirae;Uroviricota;Caudoviricetes;Caudovirales	Viral database	Methanobacteriota	Methanobacteria	Methanobacteriales	Methanobacteriaceae	Methanobrevibacter_A	Methanobrevibacter_A smithii	VC_370_0	Yes	44991	Medium-quality	77.97	81.47	Italy	0.00735294	Yes
provir|Xie_HL_2016_CS_35665.scaffold93676_3_43257_1	GUT_GENOME235230_27_63636	43257	Duplodnaviria;Heunggongvirae;Uroviricota;Caudoviricetes;Caudovirales	Viral database	Methanobacteriota	Methanobacteria	Methanobacteriales	Methanobacteriaceae	Methanobrevibacter_A	Methanobrevibacter_A smithii	VC_324_0	Yes	27072	Medium-quality	71.12	37.42	UK	0.0278361	Yes
provir|Xie_HL_2016_CS_35707.scaffold67837_2_46979_1	GUT_GENOME256439_3_14691	46979	Duplodnaviria;Heunggongvirae;Uroviricota;Caudoviricetes;Caudovirales	Viral database	Methanobacteriota	Methanobacteria	Methanobacteriales	Methanobacteriaceae	Methanobrevibacter_A	Methanobrevibacter_A smithii	VC_323_0	Yes	36248	Medium-quality	82.69	22.84	UK	0.0262605	Yes
provir|Xie_HL_2016_CS_35990.scaffold127790_2_37019_1	GUT_GENOME235230_27_63636	37019	Duplodnaviria;Heunggongvirae;Uroviricota;Caudoviricetes;Caudovirales	Viral database	Methanobacteriota	Methanobacteria	Methanobacteriales	Methanobacteriaceae	Methanobrevibacter_A	Methanobrevibacter_A smithii	VC_324_0	Yes	30518	Medium-quality	80.15	17.56	UK	0.00052521	Yes
provir|Xie_HL_2016_CS_36005.scaffold113348_1_74080_1	GUT_GENOME265602_1_80960	74080	Duplodnaviria;Heunggongvirae;Uroviricota;Caudoviricetes;Caudovirales	Viral database	Methanobacteriota	Methanobacteria	Methanobacteriales	Methanobacteriaceae	Methanobrevibacter_A	Methanobrevibacter_A smithii	VC_358_0	Yes	34532	Medium-quality	64.91	53.39	UK	0.00315126	Yes
provir|Xie_HL_2016_CS_36006.scaffold109788_2_111113_1	GUT_GENOME273866_45_728	111113	Duplodnaviria;Heunggongvirae;Uroviricota;Caudoviricetes;Caudovirales	Viral database	Methanobacteriota	Methanobacteria	Methanobacteriales	Methanobacteriaceae	Methanobrevibacter_A	Methanobrevibacter_A smithii	VC_323_0	Yes	38770	Medium-quality	72.88	65.11	UK	0.00157563	Yes
provir|Xie_HL_2016_CS_36006.scaffold113776_2_54016_1	ERR589790.NODE_500_187	54016	Duplodnaviria;Heunggongvirae;Uroviricota;Caudoviricetes;Caudovirales	Viral database	Methanobacteriota	Methanobacteria	Methanobacteriales	Methanobacteriaceae	Methanobrevibacter_A	Methanobrevibacter_A smithii	VC_359_0	Yes	34979	Medium-quality	64.22	35.24	UK	0.00105042	Yes
provir|Xie_HL_2016_CS_36006.scaffold2253_1_135914_1	ERR710432.NODE_943_6498	135914	Duplodnaviria;Heunggongvirae;Uroviricota;Caudoviricetes;Caudovirales	Eggnog markers	Methanobacteriota	Methanobacteria	Methanobacteriales	Methanobacteriaceae	Methanobrevibacter	Methanobrevibacter olleyae	Outlier	Yes	13220	Low-quality	15.83	90.27	UK	0.0283613	Yes
provir|Xie_HL_2016_CS_36055.scaffold105774_1_40753_1	CCIS38765456ST-20-0.NODE_125_97436	40753	Unassigned		Methanobacteriota	Methanobacteria	Methanobacteriales	Methanobacteriaceae	Methanobrevibacter_A	Methanobrevibacter_A smithii	Outlier	Yes	9955	Low-quality	10.72	75.57	UK	0.0147059	Yes
provir|Xie_HL_2016_CS_36116.scaffold17147_1_63032_1	GUT_GENOME235230_27_63636	63032	Duplodnaviria;Heunggongvirae;Uroviricota;Caudoviricetes;Caudovirales	Viral database	Methanobacteriota	Methanobacteria	Methanobacteriales	Methanobacteriaceae	Methanobrevibacter_A	Methanobrevibacter_A smithii	VC_324_0	Yes	28265	Medium-quality	74.22	55.16	UK	0.00052521	Yes
provir|Xie_HL_2016_CS_37097.scaffold6951_6_91880_1	GUT_GENOME268740_5_139633	91880	Duplodnaviria;Heunggongvirae;Uroviricota;Caudoviricetes;Caudovirales	Viral database	Methanobacteriota	Methanobacteria	Methanobacteriales	Methanobacteriaceae	Methanobrevibacter_A	Methanobrevibacter_A smithii	VC_323_0	Yes	43019	Complete	100	53.18	UK	0	Yes
provir|Xie_HL_2016_CS_37138.scaffold76445_2_88845_1	GUT_GENOME235230_27_63636	88845	Duplodnaviria;Heunggongvirae;Uroviricota;Caudoviricetes;Caudovirales	Eggnog markers	Methanobacteriota	Methanobacteria	Methanobacteriales	Methanobacteriaceae	Methanobrevibacter_A	Methanobrevibacter_A smithii	Outlier	Yes	19277	Medium-quality	50.63	78.3	UK	0.0105042	No
provir|Xie_HL_2016_CS_37181.scaffold47561_1_124393_1	GUT_GENOME261695_15_32706	124393	Unassigned		Methanobacteriota	Methanobacteria	Methanobacteriales	Methanobacteriaceae	Methanobrevibacter_A	Methanobrevibacter_A smithii	Outlier	Yes	6189	Low-quality	4.56	95.02	UK	0.0215336	No
provir|Xie_HL_2016_CS_37201.scaffold837_1_124807_1	GUT_GENOME261695_15_32706	124807	Duplodnaviria;Heunggongvirae;Uroviricota;Caudoviricetes;Caudovirales	Viral database	Methanobacteriota	Methanobacteria	Methanobacteriales	Methanobacteriaceae	Methanobrevibacter_A	Methanobrevibacter_A smithii	VC_323_0	Yes	40425	Complete	100	67.61	UK	0.00262605	Yes
provir|Xie_HL_2016_CS_37208.scaffold82213_1_45912_1	GUT_GENOME273866_45_581	45912	Duplodnaviria;Heunggongvirae;Uroviricota;Caudoviricetes;Caudovirales	Eggnog markers	Methanobacteriota	Methanobacteria	Methanobacteriales	Methanobacteriaceae	Methanobrevibacter_A	Methanobrevibacter_A smithii	Outlier	Yes	12870	Low-quality	16.41	71.97	UK	0.0189076	Yes
provir|Xie_HL_2016_CS_37208.scaffold82213_2_74348_1	GUT_GENOME261695_15_32706	74348	Unassigned		Methanobacteriota	Methanobacteria	Methanobacteriales	Methanobacteriaceae	Methanobrevibacter_A	Methanobrevibacter_A smithii	Outlier	Yes	12284	Low-quality	14.33	83.48	UK	0.0194328	No
provir|Xie_HL_2016_CS_37229.scaffold20520_1_62236_1	GUT_GENOME273866_45_728	62236	Duplodnaviria;Heunggongvirae;Uroviricota;Caudoviricetes;Caudovirales	Viral database	Methanobacteriota	Methanobacteria	Methanobacteriales	Methanobacteriaceae	Methanobrevibacter_A	Methanobrevibacter_A smithii	VC_323_0	Yes	43011	Medium-quality	80.85	30.89	UK	0.00052521	Yes
provir|Xie_HL_2016_CS_37292.scaffold94907_1_15944_1	GUT_GENOME261695_15_32706	15944	Unassigned		Methanobacteriota	Methanobacteria	Methanobacteriales	Methanobacteriaceae	Methanobrevibacter_A	Methanobrevibacter_A smithii	Singleton	Yes	3327	Low-quality	6.25	79.13	UK	0.00052521	No
provir|Xie_HL_2016_CS_37296.scaffold26436_3_83929_1	GUT_GENOME235230_27_63636	83929	Duplodnaviria;Heunggongvirae;Uroviricota;Caudoviricetes;Caudovirales	Viral database	Methanobacteriota	Methanobacteria	Methanobacteriales	Methanobacteriaceae	Methanobrevibacter_A	Methanobrevibacter_A smithii	VC_324_0	Yes	26108	Low-quality	28.72	68.89	UK	0.00787815	Yes
provir|Zeller_G_2014_MSB_CCIS12656533ST-4-0.NODE_235_61932_1	GUT_GENOME092376_21_25233	61932	Duplodnaviria;Heunggongvirae;Uroviricota;Caudoviricetes;Caudovirales	Viral database	Methanobacteriota	Methanobacteria	Methanobacteriales	Methanobacteriaceae	Methanobrevibacter_A	Methanobrevibacter_A smithii_A	VC_358_0	Yes	46437	Medium-quality	87.29	25.02	France	0.0183824	Yes
provir|Zeller_G_2014_MSB_CCIS47284573ST-4-0.NODE_116_47806_1	GUT_GENOME193113_11_27796	47806	Duplodnaviria;Heunggongvirae;Uroviricota;Caudoviricetes;Caudovirales	Viral database	Methanobacteriota	Methanobacteria	Methanobacteriales	Methanobacteriaceae	Methanobrevibacter_A	Methanobrevibacter_A smithii	VC_358_0	Yes	45262	Medium-quality	85.08	5.32	France	0.0215336	Yes
provir|Zeller_G_2014_MSB_CCIS90164298ST-4-0.NODE_164_78593_1	GUT_GENOME235230_27_63636	78593	Duplodnaviria;Heunggongvirae;Uroviricota;Caudoviricetes;Caudovirales	Viral database	Methanobacteriota	Methanobacteria	Methanobacteriales	Methanobacteriaceae	Methanobrevibacter_A	Methanobrevibacter_A smithii	VC_324_0	Yes	36655	Complete	100	53.36	France	0.012605	Yes
provir|Zeller_G_2014_MSB_CCIS95409808ST-4-0.NODE_65_149891_1	GUT_GENOME261695_15_32706	149891	Duplodnaviria;Heunggongvirae;Uroviricota;Caudoviricetes;Caudovirales	Viral database	Methanobacteriota	Methanobacteria	Methanobacteriales	Methanobacteriaceae	Methanobrevibacter_A	Methanobrevibacter_A smithii	VC_324_0	Yes	37883	Complete	100	74.73	France	0.032563	Yes
provir|Zeller_G_2014_MSB_CCMD42428553ST-21-0.NODE_4519_7704_1	ERR589775.NODE_71_14239	7704	Unassigned		Methanobacteriota	Methanobacteria	Methanobacteriales	Methanobacteriaceae	Methanobrevibacter_A	Methanobrevibacter_A smithii	VC_511_0	Yes	5473	Low-quality	13.85	28.96	Germany	0.00682773	Yes
provir|Zeller_G_2014_MSB_CCMD42428553ST-21-0.NODE_5278_6874_1	GUT_GENOME218694_90_5121	6874	Unassigned		Methanobacteriota	Methanobacteria	Methanobacteriales	Methanobacteriaceae	Methanobrevibacter_A	Methanobrevibacter_A smithii	Singleton	Yes	5183	Low-quality	13.12	24.6	Germany	0.00157563	No
provir|Zeller_G_2014_MSB_CCMD45988061ST-21-0.NODE_4727_5717_1	GUT_GENOME269311_7_90209	5717	Unassigned		Methanobacteriota	Methanobacteria	Methanobacteriales	Methanobacteriaceae	Methanobrevibacter_A	Methanobrevibacter_A smithii	Singleton	Yes	3897	Low-quality	9.92	31.83	Germany	0.00157563	No
provir|Zhang_X_2015_NM_ERR589543.NODE_14_211958_1	GUT_GENOME237625_19_46108	211958	Duplodnaviria;Heunggongvirae;Uroviricota;Caudoviricetes;Caudovirales	Viral database	Methanobacteriota	Methanobacteria	Methanobacteriales	Methanobacteriaceae	Methanobrevibacter_A	Methanobrevibacter_A smithii	VC_358_0	Yes	28124	Medium-quality	52.86	86.73	China	0.00577731	Yes
provir|Zhang_X_2015_NM_ERR589543.NODE_212_59878_1	SRR9655013.NODE_1263_8534	59878	Duplodnaviria;Heunggongvirae;Uroviricota;Caudoviricetes;Caudovirales	Viral database	Methanobacteriota	Methanobacteria	Methanobacteriales	Methanobacteriaceae	Methanobrevibacter_A	Methanobrevibacter_A smithii_A	Overlap (VC_326/VC_392)	Yes	24441	Low-quality	28.94	59.18	China	0.022584	Yes
provir|Zhang_X_2015_NM_ERR589740.NODE_447_64437_1	GUT_GENOME093513_2_107737	64437	Duplodnaviria;Heunggongvirae;Uroviricota;Caudoviricetes;Caudovirales	Viral database	Methanobacteriota	Methanobacteria	Methanobacteriales	Methanobacteriaceae	Methanobrevibacter_A	Methanobrevibacter_A smithii	VC_359_0	Yes	51258	High-quality	94.06	20.45	China	0	Yes
provir|Zhang_X_2015_NM_ERR589769.NODE_33_246659_1	GUT_GENOME266751_6_17485	246659	Unassigned		Methanobacteriota	Methanobacteria	Methanobacteriales	Methanobacteriaceae	Methanobrevibacter_A	Methanobrevibacter_A smithii	VC_358_0	Yes	80887	Medium-quality	70.1	67.21	China	0.00945378	Yes
provir|Zhang_X_2015_NM_ERR589769.NODE_33_246659_2	GUT_GENOME266751_6_17485	246659	Duplodnaviria;Heunggongvirae;Uroviricota;Caudoviricetes;Caudovirales	Viral database	Methanobacteriota	Methanobacteria	Methanobacteriales	Methanobacteriaceae	Methanobrevibacter_A	Methanobrevibacter_A smithii	VC_358_0	Yes	80887	Medium-quality	70.1	67.21	China	0.00945378	Yes
provir|Zhang_X_2015_NM_ERR589775.NODE_263_68917_1	GUT_GENOME259830_2_112204	68917	Unassigned		Methanobacteriota	Methanobacteria	Methanobacteriales	Methanobacteriaceae	Methanobrevibacter_A	Methanobrevibacter_A smithii	Outlier	Yes	5151	Low-quality	1.49	92.53	China	0.032563	Yes
provir|Zhang_X_2015_NM_ERR589826.NODE_22_185670_1	GUT_GENOME143185_12_220085	185670	Unassigned		Methanobacteriota	Methanobacteria	Methanobacteriales	Methanobacteriaceae	Methanobrevibacter_A	Methanobrevibacter_A smithii_A	VC_362_0	Yes	20418	Low-quality	14.72	89	China	0	Yes
PVD|gluvab|Seq_154001_Human_smacovirus_1_isolate_France/12/2008/3454_complete_genome	GUT_GENOME141221_1_931897	2460	Monodnaviria;Shotokuvirae;Cressdnaviricota;Arfiviricetes;Cremevirales;Smacoviridae;Huchismacovirus;	Viral database	Thermoplasmatota	Thermoplasmata	Methanomassiliicoccales	Methanomassiliicoccaceae	Methanomassiliicoccus_A	Methanomassiliicoccus_A intestinalis	VC_440_0	No	NA	High-quality	100	0	France	0.029937	Yes
PVD|GVD|Ma_2019_SRR341589_NODE_262_length_45054_cov_5.487189	GUT_GENOME235230_27_63636	45054	Duplodnaviria;Heunggongvirae;Uroviricota;Caudoviricetes;Caudovirales	Viral database	Methanobacteriota	Methanobacteria	Methanobacteriales	Methanobacteriaceae	Methanobrevibacter_A	Methanobrevibacter_A smithii	VC_324_0	No	NA	High-quality	100	0	China	0.00105042	Yes
PVD|GVD|Ma_2019_SRR341670_NODE_370_length_49477_cov_15.778236	GUT_GENOME266751_6_17485	49477	Duplodnaviria;Heunggongvirae;Uroviricota;Caudoviricetes;Caudovirales	Viral database	Methanobacteriota	Methanobacteria	Methanobacteriales	Methanobacteriaceae	Methanobrevibacter_A	Methanobrevibacter_A smithii	VC_358_0	No	NA	High-quality	93	0	China	0	Yes
PVD|GVD|Ma_2019_SRR413585_NODE_2154_length_7213_cov_3.080190	GUT_GENOME273630_6_81210	7213	Unassigned		Methanobacteriota	Methanobacteria	Methanobacteriales	Methanobacteriaceae	Methanobrevibacter_A	Methanobrevibacter_A smithii	Singleton	No	NA	Not-determined	NA	0	China	0	Yes
PVD|GVD|Ma_2019_SRR413585_NODE_2512_length_6241_cov_2.111057	GUT_GENOME118976_8_62425	6241	Unassigned		Methanobacteriota	Methanobacteria	Methanobacteriales	Methanobacteriaceae	Methanobrevibacter_A	Methanobrevibacter_A smithii	Outlier	No	NA	Low-quality	8.39	0	China	0	Yes
PVD|GVD|Ma_2019_SRR413585_NODE_726_length_23621_cov_2.314394	GUT_GENOME268740_5_139633	23621	Duplodnaviria;Heunggongvirae;Uroviricota;Caudoviricetes;Caudovirales	Viral database	Methanobacteriota	Methanobacteria	Methanobacteriales	Methanobacteriaceae	Methanobrevibacter_A	Methanobrevibacter_A smithii	VC_323_0	No	NA	Low-quality	44.4	0	China	0	Yes
PVD|GVD|Ma_2019_SRR413681_NODE_1120_length_20241_cov_4.926583	GUT_GENOME256439_3_14691	20241	Unassigned		Methanobacteriota	Methanobacteria	Methanobacteriales	Methanobacteriaceae	Methanobrevibacter_A	Methanobrevibacter_A smithii	Outlier	No	NA	Medium-quality	53.21	0	China	0.0231092	Yes
PVD|GVD|Ma_2019_SRR413754_NODE_324_length_74767_cov_10.573174	GUT_GENOME259830_2_112204	74767	Unassigned		Methanobacteriota	Methanobacteria	Methanobacteriales	Methanobacteriaceae	Methanobrevibacter_A	Methanobrevibacter_A smithii	Outlier	No	NA	Medium-quality	62.81	0	China	0.0252101	Yes
PVD|GVD|Minot_Diet_SRR5088938_NODE_163_length_12154_cov_91.098288	GUT_GENOME215821_25_288527	12154	Duplodnaviria;Heunggongvirae;Uroviricota;Caudoviricetes;Caudovirales;Podoviridae	Viral database	Thermoplasmatota	Thermoplasmata	Methanomassiliicoccales	Methanomassiliicoccaceae	Methanomassiliicoccus	Methanomassiliicoccus intestinalis	VC_395_0	No	NA	Low-quality	40.46	0	USA	0.0252101	Yes
PVD|GVD|Norman_106_NODE_37_length_2504_cov_7.888934	GUT_GENOME141221_1_931761	2504	Monodnaviria;Shotokuvirae;Cressdnaviricota;Arfiviricetes;Cremevirales;Smacoviridae;Huchismacovirus;	Viral database	Thermoplasmatota	Thermoplasmata	Methanomassiliicoccales	Methanomassiliicoccaceae	Methanomassiliicoccus_A	Methanomassiliicoccus_A intestinalis	VC_440_0	No	NA	Complete	100	0	USA	0.0168067	Yes
PVD|GVD|Rampelli_HCO_11_NODE_896_length_12918_cov_7.188292	GUT_GENOME017725_75_4337	12918	Unassigned		Thermoplasmatota	Thermoplasmata	Methanomassiliicoccales	Methanomethylophilaceae	UBA71	Unassigned	Singleton	No	NA	Low-quality	15.57	0	USA	0.0178571	No
PVD|GVD|Rampelli_HCO_12_NODE_74_length_42185_cov_4.777736	CCIS81710917ST-20-0.NODE_1493_17491	42185	Duplodnaviria;Heunggongvirae;Uroviricota;Caudoviricetes;Caudovirales	Viral database	Methanobacteriota	Methanobacteria	Methanobacteriales	Methanobacteriaceae	Methanobrevibacter_A	Methanobrevibacter_A smithii	VC_358_0	No	NA	Medium-quality	79.3	0	USA	0.0183824	Yes
PVD|GVD|Shkoporov_2018_SRR6128094_NODE_5_length_99079_cov_529.888320	GUT_GENOME271211_46_1314	99079	Unassigned		Methanobacteriota	Methanobacteria	Methanobacteriales	Methanobacteriaceae	Methanobrevibacter_A	Methanobrevibacter_A smithii	VC_389_0	No	NA	Medium-quality	73.68	0	Ireland	0.0294118	Yes
PVD|GVD|Zuo_2017_SRR5677785_NODE_615_length_6473_cov_5.797289	GUT_GENOME141221_1_931090	6473	Duplodnaviria;Heunggongvirae;Uroviricota;Caudoviricetes;Caudovirales;Podoviridae	Eggnog markers	Thermoplasmatota	Thermoplasmata	Methanomassiliicoccales	Methanomassiliicoccaceae	Methanomassiliicoccus	Methanomassiliicoccus intestinalis	Outlier	No	NA	Low-quality	20.36	0	China	0.0189076	Yes
PVD|GVD|Zuo_2017_SRR5677806_NODE_21_length_40158_cov_338.408149	ERR710432.NODE_943_6498	40158	Duplodnaviria;Heunggongvirae;Uroviricota;Caudoviricetes;Caudovirales;Siphoviridae	Viral database	Methanobacteriota	Methanobacteria	Methanobacteriales	Methanobacteriaceae	Methanobrevibacter	Methanobrevibacter olleyae	VC_326_0	No	NA	Complete	100	0	China	0.00945378	Yes
PVD|HGV_Individual|metaspades_NG-13376_922T10_lib202054_5478_NODE_420_length_2314_cov_2.34838	GUT_GENOME273630_25_15165	2314	Duplodnaviria;Heunggongvirae;Uroviricota;Caudoviricetes;Caudovirales	Eggnog markers	Methanobacteriota	Methanobacteria	Methanobacteriales	Methanobacteriaceae	Methanobrevibacter_A	Methanobrevibacter_A smithii	Outlier	No	NA	Low-quality	5.85	0		0.0257353	Yes
PVD|HGV_Individual|metaspades_NG-13376_922T9_lib202089_5478_NODE_17_length_36845_cov_38.724	CCIS38765456ST-20-0.NODE_125_97436	36845	Duplodnaviria;Heunggongvirae;Uroviricota;Caudoviricetes;Caudovirales	Viral database	Methanobacteriota	Methanobacteria	Methanobacteriales	Methanobacteriaceae	Methanobrevibacter_A	Methanobrevibacter_A smithii	VC_324_0	No	NA	High-quality	96.7	0		0.00210084	Yes
PVD|mVCs_PaezEspino_Nature|3300003429.aJGI25914J50564_10000010	GUT_GENOME273630_25_14578	61117	Unassigned		Methanobacteriota	Methanobacteria	Methanobacteriales	Methanobacteriaceae	Methanobrevibacter_A	Methanobrevibacter_A smithii	Singleton	No	NA	Low-quality	13.04	0		0.00315126	No
Qin_JJ_2012_Nature_SRR341670.C1105116_1_13674	GUT_GENOME205625_22_393	13674	Unassigned		Methanobacteriota	Methanobacteria	Methanobacteriales	Methanobacteriaceae	Methanobrevibacter_A	Methanobrevibacter_A smithii	VC_371_0	No	NA	Not-determined	NA	0	China	0.0120798	No
Qin_JJ_2012_Nature_SRR341670.scaffold21418_1_108462	GUT_GENOME093215_4_44917	108462	Unassigned		Methanobacteriota	Methanobacteria	Methanobacteriales	Methanobacteriaceae	Methanobrevibacter_A	Methanobrevibacter_A smithii	VC_356_0	No	NA	Not-determined	NA	0	China	0.0315126	No
Qin_JJ_2012_Nature_SRR341670.scaffold41647_2_35434	GUT_GENOME268434_7_1368	35434	Unassigned		Methanobacteriota	Methanobacteria	Methanobacteriales	Methanobacteriaceae	Methanobrevibacter_A	Methanobrevibacter_A smithii	Outlier	No	NA	Medium-quality	55.58	0	China	0.0246849	No
Qin_JJ_2012_Nature_SRR341670.scaffold87766_4_11541	GUT_GENOME143185_16_1306	11541	Unassigned		Methanobacteriota	Methanobacteria	Methanobacteriales	Methanobacteriaceae	Methanobrevibacter_A	Methanobrevibacter_A smithii_A	VC_360_0	No	NA	Not-determined	NA	0	China	0.00052521	No
Qin_JJ_2012_Nature_SRR341670.scaffold90491_1_29834	GUT_GENOME183496_95_544	29834	Unassigned		Methanobacteriota	Methanobacteria	Methanobacteriales	Methanobacteriaceae	Methanobrevibacter_A	Methanobrevibacter_A smithii	Outlier	No	NA	Low-quality	33.21	0	China	0.032563	No
Rampelli_S_2015_CB_SRR1930134.NODE_124673_287	GUT_GENOME118976_2_14640	287	Unassigned		Methanobacteriota	Methanobacteria	Methanobacteriales	Methanobacteriaceae	Methanobrevibacter_A	Methanobrevibacter_A smithii	Singleton	No	NA	Not-determined	NA	0	Tanzania	0.00157563	No
Rampelli_S_2015_CB_SRR1930134.NODE_36560_455	GUT_GENOME093513_2_107941	455	Unassigned		Methanobacteriota	Methanobacteria	Methanobacteriales	Methanobacteriaceae	Methanobrevibacter_A	Methanobrevibacter_A smithii	Singleton	No	NA	Not-determined	NA	0	Tanzania	0.0698529	No
Rampelli_S_2020_mSystems_SRR9654973.NODE_1_411137	GUT_GENOME279910_4_62128	411137	Unassigned		Methanobacteriota	Methanobacteria	Methanobacteriales	Methanobacteriaceae	Methanobrevibacter_A	Methanobrevibacter_A smithii	VC_331_5	No	NA	Not-determined	NA	0	Italy	0.0409664	No
Rampelli_S_2020_mSystems_SRR9654973.NODE_143_53475	ERR688624.NODE_1318_21	53475	Unassigned		Methanobacteriota	Methanobacteria	Methanobacteriales	Methanobacteriaceae	Methanobrevibacter_A	Methanobrevibacter_A smithii	Outlier	No	NA	Not-determined	NA	0	Italy	0.0315126	No
Rampelli_S_2020_mSystems_SRR9654973.NODE_21_168004	GUT_GENOME143185_12_220085	168004	Unassigned		Methanobacteriota	Methanobacteria	Methanobacteriales	Methanobacteriaceae	Methanobrevibacter_A	Methanobrevibacter_A smithii_A	VC_334_1	No	NA	Not-determined	NA	0	Italy	0.0141807	Yes
Rampelli_S_2020_mSystems_SRR9654973.NODE_3_367794	GUT_GENOME258086_2_60997	367794	Duplodnaviria;Heunggongvirae;Uroviricota;Caudoviricetes;Caudovirales	VOGdb markers	Methanobacteriota	Methanobacteria	Methanobacteriales	Methanobacteriaceae	Methanobrevibacter_A	Methanobrevibacter_A smithii	Overlap (VC_357/VC_358)	No	NA	Not-determined	NA	0	Italy	0.0204832	Yes
Rampelli_S_2020_mSystems_SRR9654973.NODE_86_81508	GUT_GENOME018608_1_39351	81508	Unassigned		Methanobacteriota	Methanobacteria	Methanobacteriales	Methanobacteriaceae	Methanobrevibacter_A	Methanobrevibacter_A smithii	Outlier	No	NA	Not-determined	NA	0	Italy	0.0262605	No
Rampelli_S_2020_mSystems_SRR9654974.NODE_147_50958	GUT_GENOME018608_1_39351	50958	Unassigned		Methanobacteriota	Methanobacteria	Methanobacteriales	Methanobacteriaceae	Methanobrevibacter_A	Methanobrevibacter_A smithii	Outlier	No	NA	Not-determined	NA	0	Italy	0.0372899	No
Rampelli_S_2020_mSystems_SRR9654974.NODE_235_32636	GUT_GENOME246782_8_58078	32636	Unassigned		Methanobacteriota	Methanobacteria	Methanobacteriales	Methanobacteriaceae	Methanobrevibacter_A	Methanobrevibacter_A smithii	Outlier	No	NA	Not-determined	NA	0	Italy	0.00420168	No
Rampelli_S_2020_mSystems_SRR9654974.NODE_26_136513	GUT_GENOME279910_4_62128	136513	Unassigned		Methanobacteriota	Methanobacteria	Methanobacteriales	Methanobacteriaceae	Methanobrevibacter_A	Methanobrevibacter_A smithii	VC_332_1	No	NA	Not-determined	NA	0	Italy	0	No
Rampelli_S_2020_mSystems_SRR9654974.NODE_42_112449	GUT_GENOME284814_21_16225	112449	Unassigned		Methanobacteriota	Methanobacteria	Methanobacteriales	Methanobacteriaceae	Methanobrevibacter_A	Methanobrevibacter_A smithii_A	VC_333_0	No	NA	Not-determined	NA	0	Italy	0.00262605	No
Rampelli_S_2020_mSystems_SRR9654974.NODE_53_99855	GUT_GENOME284192_60_6919	99855	Duplodnaviria;Heunggongvirae;Uroviricota;Caudoviricetes;Caudovirales	VOGdb markers	Methanobacteriota	Methanobacteria	Methanobacteriales	Methanobacteriaceae	Methanobrevibacter_A	Methanobrevibacter_A smithii_A	VC_329_5	No	NA	Not-determined	NA	0	Italy	0.022584	No
Rampelli_S_2020_mSystems_SRR9654974.NODE_54_98633	CCIS50471204ST-4-0.NODE_1624_24832	98633	Unassigned		Methanobacteriota	Methanobacteria	Methanobacteriales	Methanobacteriaceae	Methanobrevibacter_A	Methanobrevibacter_A smithii_A	VC_356_2	No	NA	Not-determined	NA	0	Italy	0.0168067	No
Rampelli_S_2020_mSystems_SRR9654974.NODE_57434_495	GUT_GENOME266751_6_14762	495	Unassigned		Methanobacteriota	Methanobacteria	Methanobacteriales	Methanobacteriaceae	Methanobrevibacter_A	Methanobrevibacter_A smithii	Singleton	No	NA	Not-determined	NA	0	Italy	0.00210084	No
Rampelli_S_2020_mSystems_SRR9654974.NODE_68_87551	GUT_GENOME269219_18_19236	87551	Unassigned		Methanobacteriota	Methanobacteria	Methanobacteriales	Methanobacteriaceae	Methanobrevibacter_A	Methanobrevibacter_A smithii	Outlier	No	NA	Not-determined	NA	0	Italy	0.0215336	No
Rampelli_S_2020_mSystems_SRR9654974.NODE_74_85249	GUT_GENOME018608_1_36299	85249	Unassigned		Methanobacteriota	Methanobacteria	Methanobacteriales	Methanobacteriaceae	Methanobrevibacter_A	Methanobrevibacter_A smithii	Outlier	No	NA	Not-determined	NA	0	Italy	0.0194328	No
Rampelli_S_2020_mSystems_SRR9654975.NODE_4_205828	GUT_GENOME143185_12_220085	205828	Unassigned		Methanobacteriota	Methanobacteria	Methanobacteriales	Methanobacteriaceae	Methanobrevibacter_A	Methanobrevibacter_A smithii_A	VC_334_1	No	NA	Not-determined	NA	0	Italy	0.00052521	Yes
Rampelli_S_2020_mSystems_SRR9654975.NODE_6_176482	GUT_GENOME194277_1_111100	176482	Unassigned		Methanobacteriota	Methanobacteria	Methanobacteriales	Methanobacteriaceae	Methanobrevibacter_A	Methanobrevibacter_A smithii	VC_331_13	No	NA	Not-determined	NA	0	Italy	0.00105042	No
Rampelli_S_2020_mSystems_SRR9654975.NODE_67_55468	ERR688624.NODE_1318_21	55468	Unassigned		Methanobacteriota	Methanobacteria	Methanobacteriales	Methanobacteriaceae	Methanobrevibacter_A	Methanobrevibacter_A smithii	Outlier	No	NA	Not-determined	NA	0	Italy	0.0236345	No
Rampelli_S_2020_mSystems_SRR9654975.NODE_9_157109	GUT_GENOME258086_2_60997	157109	Unassigned		Methanobacteriota	Methanobacteria	Methanobacteriales	Methanobacteriaceae	Methanobrevibacter_A	Methanobrevibacter_A smithii	VC_356_4	No	NA	Not-determined	NA	0	Italy	0	No
Rampelli_S_2020_mSystems_SRR9654976.NODE_31482_786	GUT_GENOME278839_11_62857	786	Unassigned		Methanobacteriota	Methanobacteria	Methanobacteriales	Methanobacteriaceae	Methanobrevibacter_A	Methanobrevibacter_A smithii	Outlier	No	NA	Low-quality	1.18	0	Italy	0.0173319	No
Rampelli_S_2020_mSystems_SRR9654976.NODE_49447_607	CCIS07539127ST-4-0.NODE_11245_229	607	Unassigned		Methanobacteriota	Methanobacteria	Methanobacteriales	Methanobacteriaceae	Methanobrevibacter_A	Methanobrevibacter_A smithii	Outlier	No	NA	Low-quality	1.59	0	Italy	0.0162815	No
Rampelli_S_2020_mSystems_SRR9654976.NODE_78426_469	GUT_GENOME268740_5_139633	469	Unassigned		Methanobacteriota	Methanobacteria	Methanobacteriales	Methanobacteriaceae	Methanobrevibacter_A	Methanobrevibacter_A smithii	Singleton	No	NA	Not-determined	NA	0	Italy	0.0189076	No
Rampelli_S_2020_mSystems_SRR9654977.NODE_1600_6703	GUT_GENOME273866_45_728	6703	Unassigned		Methanobacteriota	Methanobacteria	Methanobacteriales	Methanobacteriaceae	Methanobrevibacter_A	Methanobrevibacter_A smithii	VC_366_0	No	NA	Low-quality	17.43	0	Italy	0.00367647	No
Rampelli_S_2020_mSystems_SRR9654977.NODE_604_16491	GUT_GENOME283326_2_367048	16491	Unassigned		Methanobacteriota	Methanobacteria	Methanobacteriales	Methanobacteriaceae	Methanobrevibacter_A	Methanobrevibacter_A smithii	Outlier	No	NA	Not-determined	NA	0	Italy	0.00052521	No
Rampelli_S_2020_mSystems_SRR9654977.NODE_9568_1366	GUT_GENOME137770_7_52066	1366	Unassigned		Methanobacteriota	Methanobacteria	Methanobacteriales	Methanobacteriaceae	Methanobrevibacter_A	Methanobrevibacter_A smithii	Singleton	No	NA	Low-quality	3.54	0	Italy	0.0204832	Yes
Rampelli_S_2020_mSystems_SRR9654980.NODE_11_183961	GUT_GENOME279910_4_62128	183961	Unassigned		Methanobacteriota	Methanobacteria	Methanobacteriales	Methanobacteriaceae	Methanobrevibacter_A	Methanobrevibacter_A smithii	Outlier	No	NA	Not-determined	NA	0	Italy	0.00262605	No
Rampelli_S_2020_mSystems_SRR9654980.NODE_12_174570	GUT_GENOME143185_12_220085	174570	Unassigned		Methanobacteriota	Methanobacteria	Methanobacteriales	Methanobacteriaceae	Methanobrevibacter_A	Methanobrevibacter_A smithii_A	VC_334_1	No	NA	High-quality	100	0	Italy	0	Yes
Rampelli_S_2020_mSystems_SRR9654980.NODE_17_144635	SRR9655013.NODE_1263_8534	144635	Duplodnaviria;Heunggongvirae;Uroviricota;Caudoviricetes;Caudovirales	VOGdb markers	Methanobacteriota	Methanobacteria	Methanobacteriales	Methanobacteriaceae	Methanobrevibacter_A	Methanobrevibacter_A smithii_A	VC_329_4	No	NA	High-quality	100	0	Italy	0.0194328	No
Rampelli_S_2020_mSystems_SRR9654980.NODE_33_114301	GUT_GENOME247693_325_79	114301	Unassigned		Methanobacteriota	Methanobacteria	Methanobacteriales	Methanobacteriaceae	Methanobrevibacter_A	Methanobrevibacter_A smithii	VC_331_2	No	NA	Not-determined	NA	0	Italy	0.0147059	No
Rampelli_S_2020_mSystems_SRR9654980.NODE_40_103729	GUT_GENOME261695_15_32706	103729	Duplodnaviria;Heunggongvirae;Uroviricota;Caudoviricetes;Caudovirales	VOGdb markers	Methanobacteriota	Methanobacteria	Methanobacteriales	Methanobacteriaceae	Methanobrevibacter_A	Methanobrevibacter_A smithii	VC_327_4	No	NA	Not-determined	NA	0	Italy	0.0052521	No
Rampelli_S_2020_mSystems_SRR9654980.NODE_86_69176	ERR688624.NODE_1318_21	69176	Unassigned		Methanobacteriota	Methanobacteria	Methanobacteriales	Methanobacteriaceae	Methanobrevibacter_A	Methanobrevibacter_A smithii	Outlier	No	NA	Low-quality	49.88	0	Italy	0.0215336	No
Rampelli_S_2020_mSystems_SRR9654981.NODE_180437_363	ERR688624.NODE_1318_3232	363	Unassigned		Methanobacteriota	Methanobacteria	Methanobacteriales	Methanobacteriaceae	Methanobrevibacter_A	Methanobrevibacter_A smithii	Singleton	No	NA	Not-determined	NA	0	Italy	0.0315126	No
Rampelli_S_2020_mSystems_SRR9654982.NODE_1152_10512	GUT_GENOME263468_1_482597	10512	Unassigned		Methanobacteriota	Methanobacteria	Methanobacteriales	Methanobacteriaceae	Methanobrevibacter_A	Methanobrevibacter_A woesei	VC_362_0	No	NA	Low-quality	13.8	0	Italy	0.0357143	No
Rampelli_S_2020_mSystems_SRR9654987.NODE_116718_434	GUT_GENOME031107_26_1002	434	Unassigned		Methanobacteriota	Methanobacteria	Methanobacteriales	Methanobacteriaceae	Methanobrevibacter_A	Methanobrevibacter_A smithii	Singleton	No	NA	Not-determined	NA	0	Italy	0.0215336	No
Rampelli_S_2020_mSystems_SRR9654987.NODE_129473_407	GUT_GENOME260946_11_2837	407	Unassigned		Methanobacteriota	Methanobacteria	Methanobacteriales	Methanobacteriaceae	Methanobrevibacter_A	Methanobrevibacter_A smithii_A	Singleton	No	NA	Low-quality	0.77	0	Italy	0.0283613	No
Rampelli_S_2020_mSystems_SRR9654987.NODE_151527_369	SRR9655013.NODE_1263_8534	369	Unassigned		Methanobacteriota	Methanobacteria	Methanobacteriales	Methanobacteriaceae	Methanobrevibacter_A	Methanobrevibacter_A smithii_A	Singleton	No	NA	Low-quality	0.92	0	Italy	0.0472689	No
Rampelli_S_2020_mSystems_SRR9654987.NODE_165548_350	CCIS33816588ST-4-0.NODE_150_66470	350	Unassigned		Methanobacteriota	Methanobacteria	Methanobacteriales	Methanobacteriaceae	Methanobrevibacter_A	Methanobrevibacter_A smithii	Singleton	No	NA	Not-determined	NA	0	Italy	0.0462185	No
Rampelli_S_2020_mSystems_SRR9654987.NODE_43429_853	GUT_GENOME139679_31_15191	853	Unassigned		Methanobacteriota	Methanobacteria	Methanobacteriales	Methanobacteriaceae	Methanobrevibacter_A	Methanobrevibacter_A smithii_A	Singleton	No	NA	Low-quality	1.6	0	Italy	0.0204832	No
Rampelli_S_2020_mSystems_SRR9654988.NODE_12_170711	GUT_GENOME268434_7_1368	170711	Unassigned		Methanobacteriota	Methanobacteria	Methanobacteriales	Methanobacteriaceae	Methanobrevibacter_A	Methanobrevibacter_A smithii	Overlap (VC_333/VC_334)	No	NA	Not-determined	NA	0	Italy	0.0120798	No
Rampelli_S_2020_mSystems_SRR9654988.NODE_15_160904	GUT_GENOME269219_18_19236	160904	Unassigned		Methanobacteriota	Methanobacteria	Methanobacteriales	Methanobacteriaceae	Methanobrevibacter_A	Methanobrevibacter_A smithii	VC_331_11	No	NA	Not-determined	NA	0	Italy	0.0189076	No
Rampelli_S_2020_mSystems_SRR9654988.NODE_6_228640	GUT_GENOME247414_2_5385	228640	Duplodnaviria;Heunggongvirae;Uroviricota;Caudoviricetes;Caudovirales	VOGdb markers	Methanobacteriota	Methanobacteria	Methanobacteriales	Methanobacteriaceae	Methanobrevibacter_A	Methanobrevibacter_A smithii	VC_357_6	No	NA	Not-determined	NA	0	Italy	0.019958	Yes
Rampelli_S_2020_mSystems_SRR9654990.NODE_13_190053	GUT_GENOME246782_8_59663	190053	Unassigned		Methanobacteriota	Methanobacteria	Methanobacteriales	Methanobacteriaceae	Methanobrevibacter_A	Methanobrevibacter_A smithii	VC_331_13	No	NA	Not-determined	NA	0	Italy	0	No
Rampelli_S_2020_mSystems_SRR9654990.NODE_17_162807	GUT_GENOME018608_1_39351	162807	Duplodnaviria;Heunggongvirae;Uroviricota;Caudoviricetes;Caudovirales	VOGdb markers	Methanobacteriota	Methanobacteria	Methanobacteriales	Methanobacteriaceae	Methanobrevibacter_A	Methanobrevibacter_A smithii	VC_329_9	No	NA	Not-determined	NA	0	Italy	0.0273109	No
Rampelli_S_2020_mSystems_SRR9654990.NODE_29_129282	GUT_GENOME253955_2_249842	129282	Duplodnaviria;Heunggongvirae;Uroviricota;Caudoviricetes;Caudovirales;Myoviridae	VOGdb markers	Methanobacteriota	Methanobacteria	Methanobacteriales	Methanobacteriaceae	Methanobrevibacter_A	Methanobrevibacter_A smithii	VC_328_0	No	NA	Medium-quality	85.21	0	Italy	0.00577731	No
Rampelli_S_2020_mSystems_SRR9654990.NODE_32_124491	GUT_GENOME261695_15_32706	124491	Duplodnaviria;Heunggongvirae;Uroviricota;Caudoviricetes;Caudovirales	VOGdb markers	Methanobacteriota	Methanobacteria	Methanobacteriales	Methanobacteriaceae	Methanobrevibacter_A	Methanobrevibacter_A smithii	VC_327_0	No	NA	Not-determined	NA	0	Italy	0.0845588	No
Rampelli_S_2020_mSystems_SRR9654990.NODE_6_254958	GUT_GENOME143185_12_220085	254958	Unassigned		Methanobacteriota	Methanobacteria	Methanobacteriales	Methanobacteriaceae	Methanobrevibacter_A	Methanobrevibacter_A smithii_A	VC_334_4	No	NA	Not-determined	NA	0	Italy	0.00157563	Yes
Rampelli_S_2020_mSystems_SRR9654990.NODE_7_245237	GUT_GENOME247414_2_5385	245237	Duplodnaviria;Heunggongvirae;Uroviricota;Caudoviricetes;Caudovirales	VOGdb markers	Methanobacteriota	Methanobacteria	Methanobacteriales	Methanobacteriaceae	Methanobrevibacter_A	Methanobrevibacter_A smithii	VC_357_6	No	NA	High-quality	100	0	Italy	0.0446429	Yes
Rampelli_S_2020_mSystems_SRR9654990.NODE_9_207174	GUT_GENOME258086_2_60997	207174	Unassigned		Methanobacteriota	Methanobacteria	Methanobacteriales	Methanobacteriaceae	Methanobrevibacter_A	Methanobrevibacter_A smithii	VC_356_4	No	NA	Not-determined	NA	0	Italy	0.0294118	No
Rampelli_S_2020_mSystems_SRR9654991.NODE_17_247883	GUT_GENOME247414_2_5385	247883	Duplodnaviria;Heunggongvirae;Uroviricota;Caudoviricetes;Caudovirales	VOGdb markers	Methanobacteriota	Methanobacteria	Methanobacteriales	Methanobacteriaceae	Methanobrevibacter_A	Methanobrevibacter_A smithii	VC_357_6	No	NA	Not-determined	NA	0	Italy	0.0367647	Yes
Rampelli_S_2020_mSystems_SRR9654991.NODE_206_68742	GUT_GENOME247693_325_79	68742	Unassigned		Methanobacteriota	Methanobacteria	Methanobacteriales	Methanobacteriaceae	Methanobrevibacter_A	Methanobrevibacter_A smithii	VC_331_3	No	NA	Not-determined	NA	0	Italy	0.00105042	No
Rampelli_S_2020_mSystems_SRR9654991.NODE_246_59425	GUT_GENOME018608_1_39351	59425	Unassigned		Methanobacteriota	Methanobacteria	Methanobacteriales	Methanobacteriaceae	Methanobrevibacter_A	Methanobrevibacter_A smithii	Outlier	No	NA	Not-determined	NA	0	Italy	0.0215336	No
Rampelli_S_2020_mSystems_SRR9654991.NODE_250_58297	GUT_GENOME259830_2_112204	58297	Unassigned		Methanobacteriota	Methanobacteria	Methanobacteriales	Methanobacteriaceae	Methanobrevibacter_A	Methanobrevibacter_A smithii	Outlier	No	NA	Not-determined	NA	0	Italy	0.0215336	No
Rampelli_S_2020_mSystems_SRR9654991.NODE_2984_5877	GUT_GENOME143185_16_1306	5877	Unassigned		Methanobacteriota	Methanobacteria	Methanobacteriales	Methanobacteriaceae	Methanobrevibacter_A	Methanobrevibacter_A smithii_A	VC_369_0	No	NA	Not-determined	NA	0	Italy	0.0115546	No
Rampelli_S_2020_mSystems_SRR9654991.NODE_48_161700	GUT_GENOME143185_12_220085	161700	Unassigned		Methanobacteriota	Methanobacteria	Methanobacteriales	Methanobacteriaceae	Methanobrevibacter_A	Methanobrevibacter_A smithii_A	VC_334_1	No	NA	Not-determined	NA	0	Italy	0.0241597	Yes
Rampelli_S_2020_mSystems_SRR9654991.NODE_71_130563	GUT_GENOME279910_4_62128	130563	Unassigned		Methanobacteriota	Methanobacteria	Methanobacteriales	Methanobacteriaceae	Methanobrevibacter_A	Methanobrevibacter_A smithii	VC_332_1	No	NA	Not-determined	NA	0	Italy	0.032563	No
Rampelli_S_2020_mSystems_SRR9654992.NODE_116910_360	GUT_GENOME266751_6_14495	360	Unassigned		Methanobacteriota	Methanobacteria	Methanobacteriales	Methanobacteriaceae	Methanobrevibacter_A	Methanobrevibacter_A smithii	Singleton	No	NA	Not-determined	NA	0	Italy	0.0288866	Yes
Rampelli_S_2020_mSystems_SRR9654992.NODE_278442_234	GUT_GENOME259830_12_63770	234	Unassigned		Methanobacteriota	Methanobacteria	Methanobacteriales	Methanobacteriaceae	Methanobrevibacter_A	Methanobrevibacter_A smithii	Singleton	No	NA	Not-determined	NA	0	Italy	0.00052521	No
Rampelli_S_2020_mSystems_SRR9654999.NODE_1_552966	GUT_GENOME279910_4_62128	552966	Unassigned		Methanobacteriota	Methanobacteria	Methanobacteriales	Methanobacteriaceae	Methanobrevibacter_A	Methanobrevibacter_A smithii	VC_331_0	No	NA	Not-determined	NA	0	Italy	0.00210084	Yes
Rampelli_S_2020_mSystems_SRR9654999.NODE_103_62596	GUT_GENOME018608_1_39351	62596	Unassigned		Methanobacteriota	Methanobacteria	Methanobacteriales	Methanobacteriaceae	Methanobrevibacter_A	Methanobrevibacter_A smithii	Outlier	No	NA	Not-determined	NA	0	Italy	0.0147059	No
Rampelli_S_2020_mSystems_SRR9654999.NODE_2_302155	GUT_GENOME247414_2_5385	302155	Duplodnaviria;Heunggongvirae;Uroviricota;Caudoviricetes;Caudovirales	VOGdb markers	Methanobacteriota	Methanobacteria	Methanobacteriales	Methanobacteriaceae	Methanobrevibacter_A	Methanobrevibacter_A smithii	VC_357_6	No	NA	Not-determined	NA	0	Italy	0.00052521	Yes
Rampelli_S_2020_mSystems_SRR9654999.NODE_297_31500	GUT_GENOME259830_2_112204	31500	Unassigned		Methanobacteriota	Methanobacteria	Methanobacteriales	Methanobacteriaceae	Methanobrevibacter_A	Methanobrevibacter_A smithii	Outlier	No	NA	Not-determined	NA	0	Italy	0.0257353	No
Rampelli_S_2020_mSystems_SRR9654999.NODE_5_217870	GUT_GENOME258086_2_60997	217870	Unassigned		Methanobacteriota	Methanobacteria	Methanobacteriales	Methanobacteriaceae	Methanobrevibacter_A	Methanobrevibacter_A smithii	VC_356_4	No	NA	Not-determined	NA	0	Italy	0.00105042	No
Rampelli_S_2020_mSystems_SRR9655001.NODE_179801_374	GUT_GENOME277238_8_84595	374	Unassigned		Methanobacteriota	Methanobacteria	Methanobacteriales	Methanobacteriaceae	Methanobrevibacter_A	Methanobrevibacter_A smithii	Singleton	No	NA	Low-quality	0.94	0	Italy	0.029937	No
Rampelli_S_2020_mSystems_SRR9655001.NODE_21392_1587	GUT_GENOME268814_20_999	1587	Unassigned		Methanobacteriota	Methanobacteria	Methanobacteriales	Methanobacteriaceae	Methanobrevibacter_A	Methanobrevibacter_A smithii	Singleton	No	NA	Low-quality	3.86	0	Italy	0.0210084	No
Rampelli_S_2020_mSystems_SRR9655001.NODE_221191_331	GUT_GENOME268814_20_802	331	Unassigned		Methanobacteriota	Methanobacteria	Methanobacteriales	Methanobacteriaceae	Methanobrevibacter_A	Methanobrevibacter_A smithii	Singleton	No	NA	Not-determined	NA	0	Italy	0.0236345	No
Rampelli_S_2020_mSystems_SRR9655001.NODE_25798_1393	GUT_GENOME067420_22_760	1393	Unassigned		Methanobacteriota	Methanobacteria	Methanobacteriales	Methanobacteriaceae	Methanobrevibacter_A	Methanobrevibacter_A smithii	Outlier	No	NA	Low-quality	3.51	0	Italy	0.0168067	Yes
Rampelli_S_2020_mSystems_SRR9655001.NODE_66371_723	GUT_GENOME259830_12_62716	723	Unassigned		Methanobacteriota	Methanobacteria	Methanobacteriales	Methanobacteriaceae	Methanobrevibacter_A	Methanobrevibacter_A smithii	Outlier	No	NA	Low-quality	1.79	0	Italy	0.0477941	Yes
Rampelli_S_2020_mSystems_SRR9655005.NODE_1368_7870	GUT_GENOME263468_1_482597	7870	Unassigned		Methanobacteriota	Methanobacteria	Methanobacteriales	Methanobacteriaceae	Methanobrevibacter_A	Methanobrevibacter_A woesei	VC_374_0	No	NA	Not-determined	NA	0	Italy	0	No
Rampelli_S_2020_mSystems_SRR9655005.NODE_6046_2518	GUT_GENOME268814_20_145	2518	Unassigned		Methanobacteriota	Methanobacteria	Methanobacteriales	Methanobacteriaceae	Methanobrevibacter_A	Methanobrevibacter_A smithii	Outlier	No	NA	Low-quality	4.51	0	Italy	0.0241597	Yes
Rampelli_S_2020_mSystems_SRR9655005.NODE_62241_546	GUT_GENOME130062_8_99958	546	Unassigned		Methanobacteriota	Methanobacteria	Methanobacteriales	Methanobacteriaceae	Methanobrevibacter_A	Methanobrevibacter_A smithii	Singleton	No	NA	Low-quality	1.18	0	Italy	0.0252101	No
Rampelli_S_2020_mSystems_SRR9655005.NODE_85124_443	GUT_GENOME268814_20_472	443	Unassigned		Methanobacteriota	Methanobacteria	Methanobacteriales	Methanobacteriaceae	Methanobrevibacter_A	Methanobrevibacter_A smithii	Singleton	No	NA	Not-determined	NA	0	Italy	0.0246849	No
Rampelli_S_2020_mSystems_SRR9655006.NODE_76026_668	GUT_GENOME273630_6_81132	668	Unassigned		Methanobacteriota	Methanobacteria	Methanobacteriales	Methanobacteriaceae	Methanobrevibacter_A	Methanobrevibacter_A smithii	Singleton	No	NA	Not-determined	NA	0	Italy	0.0231092	No
Rampelli_S_2020_mSystems_SRR9655007.NODE_11599_2646	GUT_GENOME285439_1_133960	2646	Unassigned		Methanobacteriota	Methanobacteria	Methanobacteriales	Methanobacteriaceae	Methanobrevibacter_A	Methanobrevibacter_A smithii	Outlier	No	NA	Low-quality	6.96	0	Italy	0.00210084	Yes
Rampelli_S_2020_mSystems_SRR9655007.NODE_1576_10812	GUT_GENOME273866_45_728	10812	Unassigned		Methanobacteriota	Methanobacteria	Methanobacteriales	Methanobacteriaceae	Methanobrevibacter_A	Methanobrevibacter_A smithii	VC_366_0	No	NA	Low-quality	28.18	0	Italy	0	Yes
Rampelli_S_2020_mSystems_SRR9655008.NODE_15_180015	GUT_GENOME247414_2_5385	180015	Duplodnaviria;Heunggongvirae;Uroviricota;Caudoviricetes;Caudovirales	VOGdb markers	Methanobacteriota	Methanobacteria	Methanobacteriales	Methanobacteriaceae	Methanobrevibacter_A	Methanobrevibacter_A smithii	VC_357_4	No	NA	Not-determined	NA	0	Italy	0.0204832	Yes
Rampelli_S_2020_mSystems_SRR9655008.NODE_151_69940	GUT_GENOME247693_325_79	69940	Unassigned		Methanobacteriota	Methanobacteria	Methanobacteriales	Methanobacteriaceae	Methanobrevibacter_A	Methanobrevibacter_A smithii	VC_331_3	No	NA	Not-determined	NA	0	Italy	0.00682773	No
Rampelli_S_2020_mSystems_SRR9655008.NODE_288_48921	GUT_GENOME279910_4_62128	48921	Unassigned		Methanobacteriota	Methanobacteria	Methanobacteriales	Methanobacteriaceae	Methanobrevibacter_A	Methanobrevibacter_A smithii	VC_332_1	No	NA	Not-determined	NA	0	Italy	0.0215336	No
Rampelli_S_2020_mSystems_SRR9655008.NODE_33_136569	GUT_GENOME261695_15_32706	136569	Duplodnaviria;Heunggongvirae;Uroviricota;Caudoviricetes;Caudovirales	VOGdb markers	Methanobacteriota	Methanobacteria	Methanobacteriales	Methanobacteriaceae	Methanobrevibacter_A	Methanobrevibacter_A smithii	VC_327_4	No	NA	High-quality	94.01	0	Italy	0.0252101	No
Rampelli_S_2020_mSystems_SRR9655008.NODE_40_125340	GUT_GENOME259830_2_112204	125340	Duplodnaviria;Heunggongvirae;Uroviricota;Caudoviricetes;Caudovirales	VOGdb markers	Methanobacteriota	Methanobacteria	Methanobacteriales	Methanobacteriaceae	Methanobrevibacter_A	Methanobrevibacter_A smithii	VC_329_4	No	NA	Not-determined	NA	0	Italy	0	No
Rampelli_S_2020_mSystems_SRR9655010.NODE_187282_279	GUT_GENOME285439_1_133960	279	Unassigned		Methanobacteriota	Methanobacteria	Methanobacteriales	Methanobacteriaceae	Methanobrevibacter_A	Methanobrevibacter_A smithii	Singleton	No	NA	Not-determined	NA	0	Italy	0.0168067	Yes
Rampelli_S_2020_mSystems_SRR9655010.NODE_242758_250	GUT_GENOME134626_6_1584	250	Unassigned		Methanobacteriota	Methanobacteria	Methanobacteriales	Methanobacteriaceae	Methanobrevibacter_A	Methanobrevibacter_A smithii	Singleton	No	NA	Not-determined	NA	0	Italy	0.0246849	No
Rampelli_S_2020_mSystems_SRR9655010.NODE_96723_400	GUT_GENOME268814_20_603	400	Unassigned		Methanobacteriota	Methanobacteria	Methanobacteriales	Methanobacteriaceae	Methanobrevibacter_A	Methanobrevibacter_A smithii	Singleton	No	NA	Not-determined	NA	0	Italy	0.0215336	No
Rampelli_S_2020_mSystems_SRR9655011.NODE_10_202910	GUT_GENOME258086_2_60997	202910	Unassigned		Methanobacteriota	Methanobacteria	Methanobacteriales	Methanobacteriaceae	Methanobrevibacter_A	Methanobrevibacter_A smithii	VC_356_4	No	NA	Not-determined	NA	0	Italy	0.00210084	No
Rampelli_S_2020_mSystems_SRR9655011.NODE_11_195887	GUT_GENOME031107_10_18525	195887	Duplodnaviria;Heunggongvirae;Uroviricota;Caudoviricetes;Caudovirales	VOGdb markers	Methanobacteriota	Methanobacteria	Methanobacteriales	Methanobacteriaceae	Methanobrevibacter_A	Methanobrevibacter_A smithii	VC_329_6	No	NA	Not-determined	NA	0	Italy	0.0141807	No
Rampelli_S_2020_mSystems_SRR9655011.NODE_13_177520	GUT_GENOME143185_12_220085	177520	Unassigned		Methanobacteriota	Methanobacteria	Methanobacteriales	Methanobacteriaceae	Methanobrevibacter_A	Methanobrevibacter_A smithii_A	VC_334_1	No	NA	High-quality	100	0	Italy	0.0178571	Yes
Rampelli_S_2020_mSystems_SRR9655011.NODE_29_132690	GUT_GENOME247693_325_79	132690	Unassigned		Methanobacteriota	Methanobacteria	Methanobacteriales	Methanobacteriaceae	Methanobrevibacter_A	Methanobrevibacter_A smithii	VC_331_2	No	NA	Not-determined	NA	0	Italy	0.0236345	No
Rampelli_S_2020_mSystems_SRR9655011.NODE_33_129206	GUT_GENOME279910_4_62128	129206	Unassigned		Methanobacteriota	Methanobacteria	Methanobacteriales	Methanobacteriaceae	Methanobrevibacter_A	Methanobrevibacter_A smithii	VC_332_1	No	NA	Not-determined	NA	0	Italy	0.00577731	No
Rampelli_S_2020_mSystems_SRR9655011.NODE_4_239610	GUT_GENOME247414_2_5385	239610	Duplodnaviria;Heunggongvirae;Uroviricota;Caudoviricetes;Caudovirales	VOGdb markers	Methanobacteriota	Methanobacteria	Methanobacteriales	Methanobacteriaceae	Methanobrevibacter_A	Methanobrevibacter_A smithii	VC_357_6	No	NA	Not-determined	NA	0	Italy	0.00105042	Yes
Rampelli_S_2020_mSystems_SRR9655011.NODE_44_108070	GUT_GENOME268434_7_1368	108070	Unassigned		Methanobacteriota	Methanobacteria	Methanobacteriales	Methanobacteriaceae	Methanobrevibacter_A	Methanobrevibacter_A smithii	VC_333_0	No	NA	Not-determined	NA	0	Italy	0.00052521	No
Rampelli_S_2020_mSystems_SRR9655011.NODE_913_17804	SRR9655011.NODE_70_12065	17804	Unassigned		Methanobacteriota	Methanobacteria	Methanobacteriales	Methanobacteriaceae	Methanobrevibacter_A	Methanobrevibacter_A smithii	Singleton	No	NA	Not-determined	NA	0	Italy	0.0241597	No
Rampelli_S_2020_mSystems_SRR9655014.NODE_15_223792	GUT_GENOME194277_1_111100	223792	Unassigned		Methanobacteriota	Methanobacteria	Methanobacteriales	Methanobacteriaceae	Methanobrevibacter_A	Methanobrevibacter_A smithii	VC_331_13	No	NA	Not-determined	NA	0	Italy	0.00262605	No
Rampelli_S_2020_mSystems_SRR9655014.NODE_157_54708	ERR688624.NODE_1318_21	54708	Unassigned		Methanobacteriota	Methanobacteria	Methanobacteriales	Methanobacteriaceae	Methanobrevibacter_A	Methanobrevibacter_A smithii	Outlier	No	NA	Not-determined	NA	0	Italy	0	No
Rampelli_S_2020_mSystems_SRR9655014.NODE_29_169535	GUT_GENOME143185_12_220085	169535	Unassigned		Methanobacteriota	Methanobacteria	Methanobacteriales	Methanobacteriaceae	Methanobrevibacter_A	Methanobrevibacter_A smithii_A	VC_334_1	No	NA	Not-determined	NA	0	Italy	0.00997899	Yes
Rampelli_S_2020_mSystems_SRR9655014.NODE_9_295582	GUT_GENOME247414_2_5385	295582	Duplodnaviria;Heunggongvirae;Uroviricota;Caudoviricetes;Caudovirales	VOGdb markers	Methanobacteriota	Methanobacteria	Methanobacteriales	Methanobacteriaceae	Methanobrevibacter_A	Methanobrevibacter_A smithii	VC_357_6	No	NA	Not-determined	NA	0	Italy	0.0278361	Yes
Rampelli_S_2020_mSystems_SRR9655015.NODE_10_245454	GUT_GENOME247414_2_5385	245454	Duplodnaviria;Heunggongvirae;Uroviricota;Caudoviricetes;Caudovirales	VOGdb markers	Methanobacteriota	Methanobacteria	Methanobacteriales	Methanobacteriaceae	Methanobrevibacter_A	Methanobrevibacter_A smithii	VC_357_6	No	NA	Not-determined	NA	0	Italy	0.0262605	Yes
Rampelli_S_2020_mSystems_SRR9655015.NODE_19_205488	GUT_GENOME258086_2_60997	205488	Unassigned		Methanobacteriota	Methanobacteria	Methanobacteriales	Methanobacteriaceae	Methanobrevibacter_A	Methanobrevibacter_A smithii	VC_356_4	No	NA	Not-determined	NA	0	Italy	0.00052521	No
Rampelli_S_2020_mSystems_SRR9655015.NODE_23_183249	GUT_GENOME143185_12_220085	183249	Unassigned		Methanobacteriota	Methanobacteria	Methanobacteriales	Methanobacteriaceae	Methanobrevibacter_A	Methanobrevibacter_A smithii_A	VC_334_1	No	NA	High-quality	100	0	Italy	0.0162815	Yes
Rampelli_S_2020_mSystems_SRR9655015.NODE_3_328997	GUT_GENOME261695_15_32706	328997	Duplodnaviria;Heunggongvirae;Uroviricota;Caudoviricetes;Caudovirales	VOGdb markers	Methanobacteriota	Methanobacteria	Methanobacteriales	Methanobacteriaceae	Methanobrevibacter_A	Methanobrevibacter_A smithii	VC_329_2	No	NA	Not-determined	NA	0	Italy	0.00052521	No
Rampelli_S_2020_mSystems_SRR9655015.NODE_5_296081	GUT_GENOME194277_1_111100	296081	Unassigned		Methanobacteriota	Methanobacteria	Methanobacteriales	Methanobacteriaceae	Methanobrevibacter_A	Methanobrevibacter_A smithii	VC_331_4	No	NA	Not-determined	NA	0	Italy	0.00052521	No
Rampelli_S_2020_mSystems_SRR9655015.NODE_57_118138	GUT_GENOME253955_2_249842	118138	Duplodnaviria;Heunggongvirae;Uroviricota;Caudoviricetes;Caudovirales;Myoviridae	VOGdb markers	Methanobacteriota	Methanobacteria	Methanobacteriales	Methanobacteriaceae	Methanobrevibacter_A	Methanobrevibacter_A smithii	VC_328_0	No	NA	Not-determined	NA	0	Italy	0.0162815	No
Rampelli_S_2020_mSystems_SRR9655017.NODE_266_41443	GUT_GENOME259830_2_112204	41443	Unassigned		Methanobacteriota	Methanobacteria	Methanobacteriales	Methanobacteriaceae	Methanobrevibacter_A	Methanobrevibacter_A smithii	Outlier	No	NA	Not-determined	NA	0	Italy	0.0173319	No
Rampelli_S_2020_mSystems_SRR9655017.NODE_3_335546	GUT_GENOME247414_2_5385	335546	Duplodnaviria;Heunggongvirae;Uroviricota;Caudoviricetes;Caudovirales	VOGdb markers	Methanobacteriota	Methanobacteria	Methanobacteriales	Methanobacteriaceae	Methanobrevibacter_A	Methanobrevibacter_A smithii	VC_357_6	No	NA	Not-determined	NA	0	Italy	0.0194328	Yes
Rampelli_S_2020_mSystems_SRR9655017.NODE_33_117332	GUT_GENOME282742_6_115569	117332	Unassigned		Methanobacteriota	Methanobacteria	Methanobacteriales	Methanobacteriaceae	Methanobrevibacter_A	Methanobrevibacter_A smithii	VC_334_0	No	NA	Not-determined	NA	0	Italy	0.0288866	Yes
Rampelli_S_2020_mSystems_SRR9655017.NODE_43_106990	ERR688624.NODE_1318_21	106990	Duplodnaviria;Heunggongvirae;Uroviricota;Caudoviricetes;Caudovirales;Myoviridae	VOGdb markers	Methanobacteriota	Methanobacteria	Methanobacteriales	Methanobacteriaceae	Methanobrevibacter_A	Methanobrevibacter_A smithii	VC_328_0	No	NA	Not-determined	NA	0	Italy	0.012605	No
Rampelli_S_2020_mSystems_SRR9655017.NODE_45_104779	GUT_GENOME273630_6_80907	104779	Unassigned		Methanobacteriota	Methanobacteria	Methanobacteriales	Methanobacteriaceae	Methanobrevibacter_A	Methanobrevibacter_A smithii	VC_333_0	No	NA	Not-determined	NA	0	Italy	0.00105042	No
Rampelli_S_2020_mSystems_SRR9655017.NODE_6_226086	GUT_GENOME246782_8_59663	226086	Unassigned		Methanobacteriota	Methanobacteria	Methanobacteriales	Methanobacteriaceae	Methanobrevibacter_A	Methanobrevibacter_A smithii	VC_331_13	No	NA	Not-determined	NA	0	Italy	0.0157563	No
Rampelli_S_2020_mSystems_SRR9655017.NODE_9_211402	GUT_GENOME258086_2_60997	211402	Unassigned		Methanobacteriota	Methanobacteria	Methanobacteriales	Methanobacteriaceae	Methanobrevibacter_A	Methanobrevibacter_A smithii	VC_356_4	No	NA	Not-determined	NA	0	Italy	0.0157563	No
Rampelli_S_2020_mSystems_SRR9655019.NODE_11_232142	GUT_GENOME269219_18_19236	232142	Unassigned		Methanobacteriota	Methanobacteria	Methanobacteriales	Methanobacteriaceae	Methanobrevibacter_A	Methanobrevibacter_A smithii	VC_331_13	No	NA	Not-determined	NA	0	Italy	0.0283613	No
Rampelli_S_2020_mSystems_SRR9655019.NODE_12_217589	GUT_GENOME258086_2_60997	217589	Unassigned		Methanobacteriota	Methanobacteria	Methanobacteriales	Methanobacteriaceae	Methanobrevibacter_A	Methanobrevibacter_A smithii	VC_356_4	No	NA	Not-determined	NA	0	Italy	0.0267857	No
Rampelli_S_2020_mSystems_SRR9655019.NODE_242546_333	GUT_GENOME105044_15_27665	333	Unassigned		Methanobacteriota	Methanobacteria	Methanobacteriales	Methanobacteriaceae	Methanobrevibacter_A	Methanobrevibacter_A smithii	Singleton	No	NA	Not-determined	NA	0	Italy	0.0267857	No
Rampelli_S_2020_mSystems_SRR9655019.NODE_69_111577	GUT_GENOME273630_6_80907	111577	Unassigned		Methanobacteriota	Methanobacteria	Methanobacteriales	Methanobacteriaceae	Methanobrevibacter_A	Methanobrevibacter_A smithii	VC_333_0	No	NA	Not-determined	NA	0	Italy	0.0178571	No
Rampelli_S_2020_mSystems_SRR9655019.NODE_9_249977	GUT_GENOME250989_1_407944	249977	Duplodnaviria;Heunggongvirae;Uroviricota;Caudoviricetes;Caudovirales	VOGdb markers	Methanobacteriota	Methanobacteria	Methanobacteriales	Methanobacteriaceae	Methanobrevibacter_A	Methanobrevibacter_A smithii	VC_357_6	No	NA	Not-determined	NA	0	Italy	0.0252101	Yes
Rampelli_S_2020_mSystems_SRR9655020.NODE_88024_574	GUT_GENOME025992_50_6357	574	Unassigned		Methanobacteriota	Methanobacteria	Methanobacteriales	Methanobacteriaceae	Methanobrevibacter_A	Methanobrevibacter_A smithii	Singleton	No	NA	Low-quality	1.34	0	Italy	0.0236345	No
Rampelli_S_2020_mSystems_SRR9655022.NODE_22_140725	GUT_GENOME279910_4_62128	140725	Unassigned		Methanobacteriota	Methanobacteria	Methanobacteriales	Methanobacteriaceae	Methanobrevibacter_A	Methanobrevibacter_A smithii	VC_332_1	No	NA	Not-determined	NA	0	Italy	0.022584	No
Rampelli_S_2020_mSystems_SRR9655022.NODE_23_136547	GUT_GENOME011061_10_783	136547	Duplodnaviria;Heunggongvirae;Uroviricota;Caudoviricetes;Caudovirales	VOGdb markers	Methanobacteriota	Methanobacteria	Methanobacteriales	Methanobacteriaceae	Methanobrevibacter_A	Methanobrevibacter_A smithii	VC_329_5	No	NA	Not-determined	NA	0	Italy	0.049895	No
Rampelli_S_2020_mSystems_SRR9655022.NODE_36_110589	GUT_GENOME018608_1_36299	110589	Unassigned		Methanobacteriota	Methanobacteria	Methanobacteriales	Methanobacteriaceae	Methanobrevibacter_A	Methanobrevibacter_A smithii	VC_331_3	No	NA	Not-determined	NA	0	Italy	0.00157563	No
Rampelli_S_2020_mSystems_SRR9655022.NODE_42_103198	GUT_GENOME284814_21_16225	103198	Unassigned		Methanobacteriota	Methanobacteria	Methanobacteriales	Methanobacteriaceae	Methanobrevibacter_A	Methanobrevibacter_A smithii_A	VC_333_0	No	NA	Not-determined	NA	0	Italy	0.00052521	No
Rampelli_S_2020_mSystems_SRR9655022.NODE_58_92836	GUT_GENOME143185_12_220085	92836	Unassigned		Methanobacteriota	Methanobacteria	Methanobacteriales	Methanobacteriaceae	Methanobrevibacter_A	Methanobrevibacter_A smithii_A	VC_334_1	No	NA	Not-determined	NA	0	Italy	0.0388655	Yes
Rampelli_S_2020_mSystems_SRR9655023.NODE_11_168367	GUT_GENOME247414_2_5385	168367	Duplodnaviria;Heunggongvirae;Uroviricota;Caudoviricetes;Caudovirales	VOGdb markers	Methanobacteriota	Methanobacteria	Methanobacteriales	Methanobacteriaceae	Methanobrevibacter_A	Methanobrevibacter_A smithii	VC_357_1	No	NA	Not-determined	NA	0	Italy	0.00840336	Yes
Rampelli_S_2020_mSystems_SRR9655023.NODE_16_138637	GUT_GENOME279910_4_62128	138637	Unassigned		Methanobacteriota	Methanobacteria	Methanobacteriales	Methanobacteriaceae	Methanobrevibacter_A	Methanobrevibacter_A smithii	VC_332_1	No	NA	Not-determined	NA	0	Italy	0.00210084	No
Rampelli_S_2020_mSystems_SRR9655023.NODE_165_35521	SRR9655013.NODE_1263_8534	35521	Unassigned		Methanobacteriota	Methanobacteria	Methanobacteriales	Methanobacteriaceae	Methanobrevibacter_A	Methanobrevibacter_A smithii_A	Outlier	No	NA	Not-determined	NA	0	Italy	0	No
Rampelli_S_2020_mSystems_SRR9655023.NODE_37_99276	GUT_GENOME143185_12_220085	99276	Unassigned		Methanobacteriota	Methanobacteria	Methanobacteriales	Methanobacteriaceae	Methanobrevibacter_A	Methanobrevibacter_A smithii_A	VC_334_1	No	NA	Not-determined	NA	0	Italy	0.00052521	Yes
Rampelli_S_2020_mSystems_SRR9655023.NODE_38_98401	GUT_GENOME247693_325_79	98401	Unassigned		Methanobacteriota	Methanobacteria	Methanobacteriales	Methanobacteriaceae	Methanobrevibacter_A	Methanobrevibacter_A smithii	VC_331_3	No	NA	Not-determined	NA	0	Italy	0.0110294	No
Rampelli_S_2020_mSystems_SRR9655023.NODE_57_71814	GUT_GENOME282742_6_115569	71814	Unassigned		Methanobacteriota	Methanobacteria	Methanobacteriales	Methanobacteriaceae	Methanobrevibacter_A	Methanobrevibacter_A smithii	Outlier	No	NA	Not-determined	NA	0	Italy	0.0351891	No
Rampelli_S_2020_mSystems_SRR9655023.NODE_63_67705	GUT_GENOME011061_10_783	67705	Duplodnaviria;Heunggongvirae;Uroviricota;Caudoviricetes;Caudovirales	VOGdb markers	Methanobacteriota	Methanobacteria	Methanobacteriales	Methanobacteriaceae	Methanobrevibacter_A	Methanobrevibacter_A smithii	VC_329_5	No	NA	Not-determined	NA	0	Italy	0.0210084	No
Rampelli_S_2020_mSystems_SRR9655024.NODE_1819_8676	GUT_GENOME273630_6_81132	8676	Unassigned		Methanobacteriota	Methanobacteria	Methanobacteriales	Methanobacteriaceae	Methanobrevibacter_A	Methanobrevibacter_A smithii	VC_376_0	No	NA	Not-determined	NA	0	Italy	0.00052521	No
Rampelli_S_2020_mSystems_SRR9655024.NODE_2029_7881	GUT_GENOME273866_45_728	7881	Unassigned		Methanobacteriota	Methanobacteria	Methanobacteriales	Methanobacteriaceae	Methanobrevibacter_A	Methanobrevibacter_A smithii	VC_366_0	No	NA	Low-quality	20.66	0	Italy	0.0488445	No
Rampelli_S_2020_mSystems_SRR9655024.NODE_533_22138	GUT_GENOME247693_325_79	22138	Unassigned		Methanobacteriota	Methanobacteria	Methanobacteriales	Methanobacteriaceae	Methanobrevibacter_A	Methanobrevibacter_A smithii	Outlier	No	NA	Not-determined	NA	0	Italy	0.022584	No
Rampelli_S_2020_mSystems_SRR9655024.NODE_54985_606	GUT_GENOME018608_1_35714	606	Unassigned		Methanobacteriota	Methanobacteria	Methanobacteriales	Methanobacteriaceae	Methanobrevibacter_A	Methanobrevibacter_A smithii	VC_367_0	No	NA	Low-quality	1.57	0	Italy	0.00052521	No
Rampelli_S_2020_mSystems_SRR9655024.NODE_5695_3196	GUT_GENOME262465_48_7516	3196	Unassigned		Methanobacteriota	Methanobacteria	Methanobacteriales	Methanobacteriaceae	Methanobrevibacter_A	Methanobrevibacter_A smithii	Outlier	No	NA	Not-determined	NA	0	Italy	0.00052521	No
Rampelli_S_2020_mSystems_SRR9655025.NODE_102_62721	GUT_GENOME093215_4_44917	62721	Unassigned		Methanobacteriota	Methanobacteria	Methanobacteriales	Methanobacteriaceae	Methanobrevibacter_A	Methanobrevibacter_A smithii	Outlier	No	NA	Not-determined	NA	0	Italy	0.0204832	No
Rampelli_S_2020_mSystems_SRR9655025.NODE_105_60906	GUT_GENOME253955_2_249842	60906	Duplodnaviria;Heunggongvirae;Uroviricota;Caudoviricetes;Caudovirales;Myoviridae	VOGdb markers	Methanobacteriota	Methanobacteria	Methanobacteriales	Methanobacteriaceae	Methanobrevibacter_A	Methanobrevibacter_A smithii	VC_328_0	No	NA	High-quality	100	0	Italy	0.00210084	No
Rampelli_S_2020_mSystems_SRR9655025.NODE_250_33271	GUT_GENOME194462_7_71272	33271	Unassigned		Methanobacteriota	Methanobacteria	Methanobacteriales	Methanobacteriaceae	Methanobrevibacter_A	Methanobrevibacter_A smithii	Outlier	No	NA	Not-determined	NA	0	Italy	0.00892857	No
Rampelli_S_2020_mSystems_SRR9655025.NODE_39_105527	GUT_GENOME273630_6_81210	105527	Unassigned		Methanobacteriota	Methanobacteria	Methanobacteriales	Methanobacteriaceae	Methanobrevibacter_A	Methanobrevibacter_A smithii	VC_333_0	No	NA	Not-determined	NA	0	Italy	0.0367647	No
Rampelli_S_2020_mSystems_SRR9655025.NODE_526_18748	GUT_GENOME143185_16_1306	18748	Unassigned		Methanobacteriota	Methanobacteria	Methanobacteriales	Methanobacteriaceae	Methanobrevibacter_A	Methanobrevibacter_A smithii_A	VC_364_0	No	NA	Low-quality	18.48	0	Italy	0.0147059	No
Rampelli_S_2020_mSystems_SRR9655025.NODE_670_15776	GUT_GENOME258086_2_65657	15776	Unassigned		Methanobacteriota	Methanobacteria	Methanobacteriales	Methanobacteriaceae	Methanobrevibacter_A	Methanobrevibacter_A smithii	Outlier	No	NA	Not-determined	NA	0	Italy	0.0656513	Yes
Rampelli_S_2020_mSystems_SRR9655025.NODE_74_77138	GUT_GENOME143185_12_220085	77138	Unassigned		Methanobacteriota	Methanobacteria	Methanobacteriales	Methanobacteriaceae	Methanobrevibacter_A	Methanobrevibacter_A smithii_A	VC_334_1	No	NA	Not-determined	NA	0	Italy	0.0115546	Yes
Rampelli_S_2020_mSystems_SRR9655025.NODE_805_13511	GUT_GENOME252389_2_163062	13511	Unassigned		Methanobacteriota	Methanobacteria	Methanobacteriales	Methanobacteriaceae	Methanobrevibacter_A	Methanobrevibacter_A smithii	Outlier	No	NA	Low-quality	23.41	0	Italy	0.039916	Yes
Rampelli_S_2020_mSystems_SRR9655025.NODE_96_65707	GUT_GENOME282742_6_115569	65707	Unassigned		Methanobacteriota	Methanobacteria	Methanobacteriales	Methanobacteriaceae	Methanobrevibacter_A	Methanobrevibacter_A smithii	Outlier	No	NA	Medium-quality	80.93	0	Italy	0.00210084	No
Rampelli_S_2020_mSystems_SRR9655025.NODE_961_11732	GUT_GENOME085231_8_3884	11732	Duplodnaviria;Heunggongvirae;Uroviricota;Caudoviricetes;Caudovirales	VOGdb markers	Methanobacteriota	Methanobacteria	Methanobacteriales	Methanobacteriaceae	Methanobrevibacter_A	Methanobrevibacter_A smithii	VC_378_0	No	NA	Low-quality	21.52	0	Italy	0.0168067	Yes
Rampelli_S_2020_mSystems_SRR9655028.NODE_99257_446	GUT_GENOME273630_6_80982	446	Unassigned		Methanobacteriota	Methanobacteria	Methanobacteriales	Methanobacteriaceae	Methanobrevibacter_A	Methanobrevibacter_A smithii	Singleton	No	NA	Not-determined	NA	0	Italy	0.0194328	No
Rampelli_S_2020_mSystems_SRR9655029.NODE_11_202644	GUT_GENOME258086_2_60997	202644	Unassigned		Methanobacteriota	Methanobacteria	Methanobacteriales	Methanobacteriaceae	Methanobrevibacter_A	Methanobrevibacter_A smithii	VC_356_4	No	NA	Not-determined	NA	0	Italy	0.00105042	No
Rampelli_S_2020_mSystems_SRR9655029.NODE_15_174358	GUT_GENOME143185_12_220085	174358	Unassigned		Methanobacteriota	Methanobacteria	Methanobacteriales	Methanobacteriaceae	Methanobrevibacter_A	Methanobrevibacter_A smithii_A	VC_334_1	No	NA	Not-determined	NA	0	Italy	0.00105042	Yes
Rampelli_S_2020_mSystems_SRR9655029.NODE_3_313170	GUT_GENOME261695_15_32706	313170	Duplodnaviria;Heunggongvirae;Uroviricota;Caudoviricetes;Caudovirales	VOGdb markers	Methanobacteriota	Methanobacteria	Methanobacteriales	Methanobacteriaceae	Methanobrevibacter_A	Methanobrevibacter_A smithii	VC_329_3	No	NA	Not-determined	NA	0	Italy	0.00157563	No
Rampelli_S_2020_mSystems_SRR9655029.NODE_4_308287	GUT_GENOME247414_2_5385	308287	Duplodnaviria;Heunggongvirae;Uroviricota;Caudoviricetes;Caudovirales	VOGdb markers	Methanobacteriota	Methanobacteria	Methanobacteriales	Methanobacteriaceae	Methanobrevibacter_A	Methanobrevibacter_A smithii	VC_357_6	No	NA	Not-determined	NA	0	Italy	0.0472689	Yes
Rampelli_S_2020_mSystems_SRR9655029.NODE_42_107696	ERR688624.NODE_1318_21	107696	Duplodnaviria;Heunggongvirae;Uroviricota;Caudoviricetes;Caudovirales;Myoviridae	VOGdb markers	Methanobacteriota	Methanobacteria	Methanobacteriales	Methanobacteriaceae	Methanobrevibacter_A	Methanobrevibacter_A smithii	VC_328_0	No	NA	Not-determined	NA	0	Italy	0.00577731	No
Rampelli_S_2020_mSystems_SRR9655030.NODE_1362_8574	GUT_GENOME284814_21_22677	8574	Unassigned		Methanobacteriota	Methanobacteria	Methanobacteriales	Methanobacteriaceae	Methanobrevibacter_A	Methanobrevibacter_A smithii_A	VC_364_0	No	NA	Low-quality	7.93	0	Italy	0.00577731	No
Rampelli_S_2020_mSystems_SRR9655030.NODE_459_26896	GUT_GENOME023085_4_168671	26896	Unassigned		Methanobacteriota	Methanobacteria	Methanobacteriales	Methanobacteriaceae	Methanobrevibacter_A	Methanobrevibacter_A smithii	Outlier	No	NA	Not-determined	NA	0	Italy	0	No
Rampelli_S_2020_mSystems_SRR9655030.NODE_542_23362	SRR9655013.NODE_1263_8534	23362	Unassigned		Methanobacteriota	Methanobacteria	Methanobacteriales	Methanobacteriaceae	Methanobrevibacter_A	Methanobrevibacter_A smithii_A	Outlier	No	NA	Not-determined	NA	0	Italy	0.00945378	No
Rampelli_S_2020_mSystems_SRR9655030.NODE_9942_1105	GUT_GENOME225756_334_2675	1105	Unassigned		Methanobacteriota	Methanobacteria	Methanobacteriales	Methanobacteriaceae	Methanobrevibacter_A	Methanobrevibacter_A smithii	Singleton	No	NA	Not-determined	NA	0	Italy	0.0262605	Yes
Smits_SA_2017_Science_SRR5763450.NODE_11951_1411	GUT_GENOME135949_10_18600	1411	Unassigned		Methanobacteriota	Methanobacteria	Methanobacteriales	Methanobacteriaceae	Methanobrevibacter_A	Methanobrevibacter_A smithii	Singleton	No	NA	Low-quality	2.65	0	Tanzania	0.00052521	No
Smits_SA_2017_Science_SRR5763450.NODE_137108_379	GUT_GENOME031107_26_1002	379	Unassigned		Methanobacteriota	Methanobacteria	Methanobacteriales	Methanobacteriaceae	Methanobrevibacter_A	Methanobrevibacter_A smithii	Singleton	No	NA	Not-determined	NA	0	Tanzania	0.0262605	No
Smits_SA_2017_Science_SRR5763450.NODE_1442_3912	GUT_GENOME247414_2_5385	3912	Unassigned		Methanobacteriota	Methanobacteria	Methanobacteriales	Methanobacteriaceae	Methanobrevibacter_A	Methanobrevibacter_A smithii	Outlier	No	NA	Not-determined	NA	0	Tanzania	0.022584	No
Smits_SA_2017_Science_SRR5763450.NODE_16143_1222	GUT_GENOME134705_1_174422	1222	Unassigned		Methanobacteriota	Methanobacteria	Methanobacteriales	Methanobacteriaceae	Methanobrevibacter_A	Methanobrevibacter_A smithii	Singleton	No	NA	Not-determined	NA	0	Tanzania	0.0976891	No
Smits_SA_2017_Science_SRR5763450.NODE_16289_1216	SRR9655013.NODE_1263_8534	1216	Unassigned		Methanobacteriota	Methanobacteria	Methanobacteriales	Methanobacteriaceae	Methanobrevibacter_A	Methanobrevibacter_A smithii_A	Singleton	No	NA	Low-quality	3.16	0	Tanzania	0.0273109	No
Smits_SA_2017_Science_SRR5763450.NODE_19484_1116	GUT_GENOME251508_6_43884	1116	Unassigned		Methanobacteriota	Methanobacteria	Methanobacteriales	Methanobacteriaceae	Methanobrevibacter_A	Methanobrevibacter_A smithii	Singleton	No	NA	Not-determined	NA	0	Tanzania	0	No
Smits_SA_2017_Science_SRR5763450.NODE_21574_1062	GUT_GENOME268434_7_1368	1062	Unassigned		Methanobacteriota	Methanobacteria	Methanobacteriales	Methanobacteriaceae	Methanobrevibacter_A	Methanobrevibacter_A smithii	Singleton	No	NA	Not-determined	NA	0	Tanzania	0.00735294	No
Smits_SA_2017_Science_SRR5763450.NODE_23209_1024	GUT_GENOME265514_3_164993	1024	Unassigned		Methanobacteriota	Methanobacteria	Methanobacteriales	Methanobacteriaceae	Methanobrevibacter_A	Methanobrevibacter_A smithii	Singleton	No	NA	Not-determined	NA	0	Tanzania	0.00052521	No
Smits_SA_2017_Science_SRR5763450.NODE_24549_996	GUT_GENOME269311_7_90078	996	Duplodnaviria;Heunggongvirae;Uroviricota;Caudoviricetes;Caudovirales	Eggnog markers	Methanobacteriota	Methanobacteria	Methanobacteriales	Methanobacteriaceae	Methanobrevibacter_A	Methanobrevibacter_A smithii	Singleton	No	NA	Not-determined	NA	0	Tanzania	0.00157563	No
Smits_SA_2017_Science_SRR5763450.NODE_2633_2864	GUT_GENOME273630_6_81210	2864	Unassigned		Methanobacteriota	Methanobacteria	Methanobacteriales	Methanobacteriaceae	Methanobrevibacter_A	Methanobrevibacter_A smithii	Singleton	No	NA	Not-determined	NA	0	Tanzania	0.00052521	Yes
Smits_SA_2017_Science_SRR5763450.NODE_31731_876	GUT_GENOME068190_13_66648	876	Unassigned		Methanobacteriota	Methanobacteria	Methanobacteriales	Methanobacteriaceae	Methanobrevibacter_A	Methanobrevibacter_A smithii	Singleton	No	NA	Low-quality	2.3	0	Tanzania	0.00315126	No
Smits_SA_2017_Science_SRR5763450.NODE_31919_873	GUT_GENOME105044_15_26707	873	Unassigned		Methanobacteriota	Methanobacteria	Methanobacteriales	Methanobacteriaceae	Methanobrevibacter_A	Methanobrevibacter_A smithii	Outlier	No	NA	Low-quality	1.79	0	Tanzania	0.0162815	Yes
Smits_SA_2017_Science_SRR5763450.NODE_66369_580	GUT_GENOME269311_7_91542	580	Unassigned		Methanobacteriota	Methanobacteria	Methanobacteriales	Methanobacteriaceae	Methanobrevibacter_A	Methanobrevibacter_A smithii	Singleton	No	NA	Low-quality	0.54	0	Tanzania	0.00052521	No
Smits_SA_2017_Science_SRR5763451.NODE_145629_393	GUT_GENOME246782_8_58078	393	Unassigned		Methanobacteriota	Methanobacteria	Methanobacteriales	Methanobacteriaceae	Methanobrevibacter_A	Methanobrevibacter_A smithii	Singleton	No	NA	Low-quality	0.98	0	Tanzania	0	No
Smits_SA_2017_Science_SRR5763452.NODE_104759_407	GUT_GENOME282742_6_115569	407	Unassigned		Methanobacteriota	Methanobacteria	Methanobacteriales	Methanobacteriaceae	Methanobrevibacter_A	Methanobrevibacter_A smithii	Singleton	No	NA	Not-determined	NA	0	Tanzania	0.0362395	No
Smits_SA_2017_Science_SRR5763454.NODE_249243_306	GUT_GENOME265776_7_73441	306	Unassigned		Methanobacteriota	Methanobacteria	Methanobacteriales	Methanobacteriaceae	Methanobrevibacter_A	Methanobrevibacter_A smithii	Singleton	No	NA	Not-determined	NA	0	Tanzania	0.0105042	No
Smits_SA_2017_Science_SRR5763454.NODE_261659_298	GUT_GENOME266751_6_14628	298	Unassigned		Methanobacteriota	Methanobacteria	Methanobacteriales	Methanobacteriaceae	Methanobrevibacter_A	Methanobrevibacter_A smithii	Singleton	No	NA	Not-determined	NA	0	Tanzania	0.00157563	No
Smits_SA_2017_Science_SRR5763456.NODE_1230_2028	GUT_GENOME283665_29_11471	2028	Unassigned		Methanobacteriota	Methanobacteria	Methanobacteriales	Methanobacteriaceae	Methanobrevibacter_A	Methanobrevibacter_A smithii	Singleton	No	NA	Not-determined	NA	0	Tanzania	0.0378151	Yes
Smits_SA_2017_Science_SRR5763456.NODE_4255_1046	GUT_GENOME273630_6_80907	1046	Unassigned		Methanobacteriota	Methanobacteria	Methanobacteriales	Methanobacteriaceae	Methanobrevibacter_A	Methanobrevibacter_A smithii	Singleton	No	NA	Not-determined	NA	0	Tanzania	0.0131303	No
Smits_SA_2017_Science_SRR5763456.NODE_4586_1005	GUT_GENOME246782_8_58078	1005	Unassigned		Methanobacteriota	Methanobacteria	Methanobacteriales	Methanobacteriaceae	Methanobrevibacter_A	Methanobrevibacter_A smithii	VC_375_0	No	NA	Low-quality	2.51	0	Tanzania	0.0288866	No
Smits_SA_2017_Science_SRR5763458.NODE_2990_1366	ERR688624.NODE_1318_21	1366	Unassigned		Methanobacteriota	Methanobacteria	Methanobacteriales	Methanobacteriaceae	Methanobrevibacter_A	Methanobrevibacter_A smithii	VC_330_0	No	NA	Low-quality	2.36	0	Tanzania	0	No
Smits_SA_2017_Science_SRR5763458.NODE_785_2527	GUT_GENOME250989_1_407944	2527	Unassigned		Methanobacteriota	Methanobacteria	Methanobacteriales	Methanobacteriaceae	Methanobrevibacter_A	Methanobrevibacter_A smithii	Singleton	No	NA	Low-quality	2.36	0	Tanzania	0	No
Smits_SA_2017_Science_SRR5763460.NODE_1821_2383	GUT_GENOME251364_2_123712	2383	Unassigned		Methanobacteriota	Methanobacteria	Methanobacteriales	Methanobacteriaceae	Methanobrevibacter_A	Methanobrevibacter_A smithii_A	VC_377_0	No	NA	Not-determined	NA	0	Tanzania	0.00840336	No
Smits_SA_2017_Science_SRR5763460.NODE_6232_1153	ERR688624.NODE_1318_21	1153	Unassigned		Methanobacteriota	Methanobacteria	Methanobacteriales	Methanobacteriaceae	Methanobrevibacter_A	Methanobrevibacter_A smithii	Singleton	No	NA	Low-quality	1.78	0	Tanzania	0.0215336	No
Smits_SA_2017_Science_SRR5763463.NODE_119981_254	GUT_GENOME137479_11_68490	254	Unassigned		Methanobacteriota	Methanobacteria	Methanobacteriales	Methanobacteriaceae	Methanobrevibacter_A	Methanobrevibacter_A smithii	Singleton	No	NA	Not-determined	NA	0	Tanzania	0	No
Smits_SA_2017_Science_SRR5763463.NODE_5213_1127	GUT_GENOME130062_8_99958	1127	Unassigned		Methanobacteriota	Methanobacteria	Methanobacteriales	Methanobacteriaceae	Methanobrevibacter_A	Methanobrevibacter_A smithii	VC_394_0	No	NA	Low-quality	2.8	0	Tanzania	0.0183824	Yes
Smits_SA_2017_Science_SRR5763463.NODE_5760_1074	GUT_GENOME139679_31_15390	1074	Duplodnaviria;Heunggongvirae;Uroviricota;Caudoviricetes;Caudovirales	Eggnog markers	Methanobacteriota	Methanobacteria	Methanobacteriales	Methanobacteriaceae	Methanobrevibacter_A	Methanobrevibacter_A smithii_A	Singleton	No	NA	Not-determined	NA	0	Tanzania	0.0246849	No
Smits_SA_2017_Science_SRR5763463.NODE_60958_330	CCIS07539127ST-4-0.NODE_11245_229	330	Unassigned		Methanobacteriota	Methanobacteria	Methanobacteriales	Methanobacteriaceae	Methanobrevibacter_A	Methanobrevibacter_A smithii	Singleton	No	NA	Low-quality	0.87	0	Tanzania	0	No
Smits_SA_2017_Science_SRR5763464.NODE_164085_230	GUT_GENOME134705_1_173891	230	Unassigned		Methanobacteriota	Methanobacteria	Methanobacteriales	Methanobacteriaceae	Methanobrevibacter_A	Methanobrevibacter_A smithii	Singleton	No	NA	Not-determined	NA	0	Tanzania	0.0105042	Yes
Smits_SA_2017_Science_SRR5763464.NODE_41674_387	ERR688624.NODE_1318_21	387	Unassigned		Methanobacteriota	Methanobacteria	Methanobacteriales	Methanobacteriaceae	Methanobrevibacter_A	Methanobrevibacter_A smithii	Singleton	No	NA	Not-determined	NA	0	Tanzania	0.00052521	No
Smits_SA_2017_Science_SRR5763464.NODE_9077_758	GUT_GENOME272206_72_171	758	Unassigned		Methanobacteriota	Methanobacteria	Methanobacteriales	Methanobacteriaceae	Methanobrevibacter_A	Methanobrevibacter_A smithii	Singleton	No	NA	Not-determined	NA	0	Tanzania	0.00052521	No
Smits_SA_2017_Science_SRR5763470.NODE_12227_600	GUT_GENOME265514_3_164993	600	Unassigned		Methanobacteriota	Methanobacteria	Methanobacteriales	Methanobacteriaceae	Methanobrevibacter_A	Methanobrevibacter_A smithii	Singleton	No	NA	Not-determined	NA	0	Tanzania	0	No
Smits_SA_2017_Science_SRR5763470.NODE_1808_2441	GUT_GENOME269311_7_90143	2441	Unassigned		Methanobacteriota	Methanobacteria	Methanobacteriales	Methanobacteriaceae	Methanobrevibacter_A	Methanobrevibacter_A smithii	Outlier	No	NA	Low-quality	5.25	0	Tanzania	0.0288866	Yes
Smits_SA_2017_Science_SRR5763470.NODE_1922_2313	GUT_GENOME278839_11_62584	2313	Duplodnaviria;Heunggongvirae;Uroviricota;Caudoviricetes;Caudovirales	VOGdb markers	Methanobacteriota	Methanobacteria	Methanobacteriales	Methanobacteriaceae	Methanobrevibacter_A	Methanobrevibacter_A smithii	VC_380_0	No	NA	Low-quality	4.24	0	Tanzania	0.00052521	No
Smits_SA_2017_Science_SRR5763470.NODE_1965_2270	GUT_GENOME282407_15_5026	2270	Unassigned		Methanobacteriota	Methanobacteria	Methanobacteriales	Methanobacteriaceae	Methanobrevibacter_A	Methanobrevibacter_A smithii_A	Outlier	No	NA	Low-quality	4.16	0	Tanzania	0.0178571	Yes
Smits_SA_2017_Science_SRR5763470.NODE_5183_1017	GUT_GENOME025992_50_6357	1017	Duplodnaviria;Heunggongvirae;Uroviricota;Caudoviricetes;Caudovirales	VOGdb markers	Methanobacteriota	Methanobacteria	Methanobacteriales	Methanobacteriaceae	Methanobrevibacter_A	Methanobrevibacter_A smithii	VC_380_0	No	NA	Low-quality	2.39	0	Tanzania	0.0220588	No
Smits_SA_2017_Science_SRR5763470.NODE_641_4824	GUT_GENOME285439_1_131040	4824	Duplodnaviria;Heunggongvirae;Uroviricota;Caudoviricetes;Caudovirales	VOGdb markers	Methanobacteriota	Methanobacteria	Methanobacteriales	Methanobacteriaceae	Methanobrevibacter_A	Methanobrevibacter_A smithii	VC_378_0	No	NA	Low-quality	8.85	0	Tanzania	0.00472689	Yes
Smits_SA_2017_Science_SRR5763470.NODE_9146_709	GUT_GENOME268740_5_138901	709	Unassigned		Methanobacteriota	Methanobacteria	Methanobacteriales	Methanobacteriaceae	Methanobrevibacter_A	Methanobrevibacter_A smithii	Singleton	No	NA	Not-determined	NA	0	Tanzania	0.00157563	No
Smits_SA_2017_Science_SRR5763472.NODE_20052_590	GUT_GENOME199246_19_11001	590	Unassigned		Methanobacteriota	Methanobacteria	Methanobacteriales	Methanobacteriaceae	Methanobrevibacter_A	Methanobrevibacter_A smithii	Singleton	No	NA	Not-determined	NA	0	Tanzania	0.00787815	No
Smits_SA_2017_Science_SRR5763472.NODE_24878_528	GUT_GENOME134626_6_2437	528	Unassigned		Methanobacteriota	Methanobacteria	Methanobacteriales	Methanobacteriaceae	Methanobrevibacter_A	Methanobrevibacter_A smithii	Singleton	No	NA	Not-determined	NA	0	Tanzania	0.0241597	Yes
Smits_SA_2017_Science_SRR5763472.NODE_32372_464	GUT_GENOME265776_7_72442	464	Unassigned		Methanobacteriota	Methanobacteria	Methanobacteriales	Methanobacteriaceae	Methanobrevibacter_A	Methanobrevibacter_A smithii	VC_393_0	No	NA	Low-quality	1.22	0	Tanzania	0.00157563	No
Smits_SA_2017_Science_SRR5763472.NODE_35562_445	GUT_GENOME256439_3_13514	445	Unassigned		Methanobacteriota	Methanobacteria	Methanobacteriales	Methanobacteriaceae	Methanobrevibacter_A	Methanobrevibacter_A smithii	Singleton	No	NA	Not-determined	NA	0	Tanzania	0	No
Smits_SA_2017_Science_SRR5763472.NODE_3768_1655	GUT_GENOME235230_27_63636	1655	Unassigned		Methanobacteriota	Methanobacteria	Methanobacteriales	Methanobacteriaceae	Methanobrevibacter_A	Methanobrevibacter_A smithii	Singleton	No	NA	Not-determined	NA	0	Tanzania	0.0162815	No
Smits_SA_2017_Science_SRR5763472.NODE_6027_1221	GUT_GENOME109540_29_1062	1221	Unassigned		Methanobacteriota	Methanobacteria	Methanobacteriales	Methanobacteriaceae	Methanobrevibacter_A	Methanobrevibacter_A smithii	Singleton	No	NA	Low-quality	2.3	0	Tanzania	0.00052521	No
Smits_SA_2017_Science_SRR5763472.NODE_6255_1191	GUT_GENOME265514_3_164993	1191	Unassigned		Methanobacteriota	Methanobacteria	Methanobacteriales	Methanobacteriaceae	Methanobrevibacter_A	Methanobrevibacter_A smithii	VC_494_0	No	NA	Not-determined	NA	0	Tanzania	0.00105042	No
Smits_SA_2017_Science_SRR5763473.NODE_1678_2808	ERR589775.NODE_71_18440	2808	Unassigned		Methanobacteriota	Methanobacteria	Methanobacteriales	Methanobacteriaceae	Methanobrevibacter_A	Methanobrevibacter_A smithii	Outlier	No	NA	Low-quality	7.33	0	Tanzania	0.0220588	Yes
Smits_SA_2017_Science_SRR5763473.NODE_1948_2557	GUT_GENOME251364_2_123712	2557	Unassigned		Methanobacteriota	Methanobacteria	Methanobacteriales	Methanobacteriaceae	Methanobrevibacter_A	Methanobrevibacter_A smithii_A	VC_377_0	No	NA	Not-determined	NA	0	Tanzania	0.00052521	No
Smits_SA_2017_Science_SRR5763473.NODE_6031_1353	GUT_GENOME268814_20_603	1353	Unassigned		Methanobacteriota	Methanobacteria	Methanobacteriales	Methanobacteriaceae	Methanobrevibacter_A	Methanobrevibacter_A smithii	Singleton	No	NA	Low-quality	3.45	0	Tanzania	0.0236345	No
Smits_SA_2017_Science_SRR5763476.NODE_539_4588	GUT_GENOME284814_21_22677	4588	Unassigned		Methanobacteriota	Methanobacteria	Methanobacteriales	Methanobacteriaceae	Methanobrevibacter_A	Methanobrevibacter_A smithii_A	VC_364_0	No	NA	Not-determined	NA	0	Tanzania	0.0115546	No
Smits_SA_2017_Science_SRR5763477.NODE_17034_657	GUT_GENOME246782_8_57751	657	Unassigned		Methanobacteriota	Methanobacteria	Methanobacteriales	Methanobacteriaceae	Methanobrevibacter_A	Methanobrevibacter_A smithii	Singleton	No	NA	Low-quality	1.52	0	Tanzania	0.00262605	No
Smits_SA_2017_Science_SRR5763477.NODE_18008_640	GUT_GENOME134626_6_3293	640	Unassigned		Methanobacteriota	Methanobacteria	Methanobacteriales	Methanobacteriaceae	Methanobrevibacter_A	Methanobrevibacter_A smithii	Singleton	No	NA	Low-quality	0.25	0	Tanzania	0.00682773	Yes
Smits_SA_2017_Science_SRR5763477.NODE_21926_579	ERR688525.NODE_5_334347	579	Unassigned		Methanobacteriota	Methanobacteria	Methanobacteriales	Methanobacteriaceae	Methanobrevibacter_A	Methanobrevibacter_A smithii_A	Singleton	No	NA	Not-determined	NA	0	Tanzania	0.0178571	No
Smits_SA_2017_Science_SRR5763477.NODE_41193_418	GUT_GENOME130062_8_99958	418	Unassigned		Methanobacteriota	Methanobacteria	Methanobacteriales	Methanobacteriaceae	Methanobrevibacter_A	Methanobrevibacter_A smithii	Outlier	No	NA	Low-quality	1.08	0	Tanzania	0.00420168	Yes
Smits_SA_2017_Science_SRR5763477.NODE_50753_376	GUT_GENOME094374_1_68817	376	Unassigned		Methanobacteriota	Methanobacteria	Methanobacteriales	Methanobacteriaceae	Methanobrevibacter_A	Methanobrevibacter_A smithii	Singleton	No	NA	Low-quality	0.94	0	Tanzania	0.012605	No
Smits_SA_2017_Science_SRR5763477.NODE_5168_1151	GUT_GENOME259117_6_46842	1151	Unassigned		Methanobacteriota	Methanobacteria	Methanobacteriales	Methanobacteriaceae	Methanobrevibacter_A	Methanobrevibacter_A smithii	Singleton	No	NA	Not-determined	NA	0	Tanzania	0.0105042	No
Smits_SA_2017_Science_SRR5763477.NODE_57113_354	GUT_GENOME134626_6_3293	354	Unassigned		Methanobacteriota	Methanobacteria	Methanobacteriales	Methanobacteriaceae	Methanobrevibacter_A	Methanobrevibacter_A smithii	Singleton	No	NA	Low-quality	0.19	0	Tanzania	0.0294118	Yes
Smits_SA_2017_Science_SRR5763477.NODE_8416_923	ERR688525.NODE_5_334481	923	Unassigned		Methanobacteriota	Methanobacteria	Methanobacteriales	Methanobacteriaceae	Methanobrevibacter_A	Methanobrevibacter_A smithii_A	Singleton	No	NA	Low-quality	2.33	0	Tanzania	0.0409664	No
Smits_SA_2017_Science_SRR5763477.NODE_9542_868	GUT_GENOME282111_15_39227	868	Unassigned		Methanobacteriota	Methanobacteria	Methanobacteriales	Methanobacteriaceae	Methanobrevibacter_A	Methanobrevibacter_A smithii	Singleton	No	NA	Low-quality	2.26	0	Tanzania	0.00157563	No
Smits_SA_2017_Science_SRR5763477.NODE_99746_270	CCIS81710917ST-20-0.NODE_1493_17628	270	Unassigned		Methanobacteriota	Methanobacteria	Methanobacteriales	Methanobacteriaceae	Methanobrevibacter_A	Methanobrevibacter_A smithii	Singleton	No	NA	Low-quality	0.57	0	Tanzania	0.019958	No
Smits_SA_2017_Science_SRR5763479.NODE_98_6022	GUT_GENOME263468_1_482597	6022	Unassigned		Methanobacteriota	Methanobacteria	Methanobacteriales	Methanobacteriaceae	Methanobrevibacter_A	Methanobrevibacter_A woesei	VC_374_0	No	NA	Not-determined	NA	0	Tanzania	0.022584	No
Smits_SA_2017_Science_SRR5763480.NODE_1687_2416	GUT_GENOME135949_10_17676	2416	Duplodnaviria;Heunggongvirae;Uroviricota;Caudoviricetes;Caudovirales	VOGdb markers	Methanobacteriota	Methanobacteria	Methanobacteriales	Methanobacteriaceae	Methanobrevibacter_A	Methanobrevibacter_A smithii	VC_386_0	No	NA	Low-quality	4.54	0	Tanzania	0.0330882	No
Smits_SA_2017_Science_SRR5763480.NODE_2459_2011	GUT_GENOME273866_45_728	2011	Unassigned		Methanobacteriota	Methanobacteria	Methanobacteriales	Methanobacteriaceae	Methanobrevibacter_A	Methanobrevibacter_A smithii	VC_457_0	No	NA	Low-quality	5.23	0	Tanzania	0.0215336	No
Smits_SA_2017_Science_SRR5763480.NODE_6084_1273	GUT_GENOME260847_3_13664	1273	Unassigned		Methanobacteriota	Methanobacteria	Methanobacteriales	Methanobacteriaceae	Methanobrevibacter_A	Methanobrevibacter_A smithii	Singleton	No	NA	Low-quality	2.3	0	Tanzania	0.0945378	No
Smits_SA_2017_Science_SRR5763481.NODE_163837_233	GUT_GENOME025992_50_6425	233	Unassigned		Methanobacteriota	Methanobacteria	Methanobacteriales	Methanobacteriaceae	Methanobrevibacter_A	Methanobrevibacter_A smithii	Singleton	No	NA	Not-determined	NA	0	Tanzania	0.0220588	No
Smits_SA_2017_Science_SRR5763482.NODE_58519_347	GUT_GENOME260613_23_21673	347	Unassigned		Methanobacteriota	Methanobacteria	Methanobacteriales	Methanobacteriaceae	Methanobrevibacter_A	Methanobrevibacter_A smithii_A	Singleton	No	NA	Not-determined	NA	0	Tanzania	0.0157563	No
Vatanen_T_2016_Cell_SRR4305530.NODE_170_26392	GUT_GENOME018608_1_36299	26392	Unassigned		Methanobacteriota	Methanobacteria	Methanobacteriales	Methanobacteriaceae	Methanobrevibacter_A	Methanobrevibacter_A smithii	VC_355_0	No	NA	Not-determined	NA	0	Russia	0.0267857	No
Vatanen_T_2016_Cell_SRR4305530.NODE_613_5737	GUT_GENOME105435_8_56410	5737	Unassigned		Methanobacteriota	Methanobacteria	Methanobacteriales	Methanobacteriaceae	Methanobrevibacter_A	Methanobrevibacter_A smithii	Outlier	No	NA	Low-quality	10.78	0	Russia	0.00262605	Yes
Vatanen_T_2016_Cell_SRR4305530.NODE_653_5489	GUT_GENOME273866_45_728	5489	Unassigned		Methanobacteriota	Methanobacteria	Methanobacteriales	Methanobacteriaceae	Methanobrevibacter_A	Methanobrevibacter_A smithii	Outlier	No	NA	Low-quality	14.31	0	Russia	0.00735294	Yes
Vatanen_T_2016_Cell_SRR4408017.NODE_104805_285	GUT_GENOME139679_31_15390	285	Unassigned		Methanobacteriota	Methanobacteria	Methanobacteriales	Methanobacteriaceae	Methanobrevibacter_A	Methanobrevibacter_A smithii_A	Singleton	No	NA	Not-determined	NA	0	Estonia	0.00210084	No
Xie_HL_2016_CS_35387.scaffold2097_2_95893	GUT_GENOME273630_6_81210	95893	Unassigned		Methanobacteriota	Methanobacteria	Methanobacteriales	Methanobacteriaceae	Methanobrevibacter_A	Methanobrevibacter_A smithii	VC_332_1	No	NA	Not-determined	NA	0	UK	0.0283613	No
Xie_HL_2016_CS_35387.scaffold521_1_156137	GUT_GENOME143185_12_220085	156137	Unassigned		Methanobacteriota	Methanobacteria	Methanobacteriales	Methanobacteriaceae	Methanobrevibacter_A	Methanobrevibacter_A smithii_A	VC_334_1	No	NA	Not-determined	NA	0	UK	0.0283613	Yes
Xie_HL_2016_CS_35387.scaffold83578_1_128481	GUT_GENOME258086_2_60997	128481	Unassigned		Methanobacteriota	Methanobacteria	Methanobacteriales	Methanobacteriaceae	Methanobrevibacter_A	Methanobrevibacter_A smithii	VC_356_2	No	NA	Not-determined	NA	0	UK	0.0220588	No
Xie_HL_2016_CS_35387.scaffold96094_1_77150	GUT_GENOME259830_2_112204	77150	Unassigned		Methanobacteriota	Methanobacteria	Methanobacteriales	Methanobacteriaceae	Methanobrevibacter_A	Methanobrevibacter_A smithii	Outlier	No	NA	Not-determined	NA	0	UK	0.0231092	No
Xie_HL_2016_CS_35505.scaffold12573_4_20017	GUT_GENOME282393_2_138289	20017	Unassigned		Methanobacteriota	Methanobacteria	Methanobacteriales	Methanobacteriaceae	Methanobrevibacter_A	Methanobrevibacter_A smithii	VC_362_0	No	NA	Not-determined	NA	0	UK	0.00052521	No
Xie_HL_2016_CS_35505.scaffold43668_5_76053	GUT_GENOME258086_2_60997	76053	Unassigned		Methanobacteriota	Methanobacteria	Methanobacteriales	Methanobacteriaceae	Methanobrevibacter_A	Methanobrevibacter_A smithii	Outlier	No	NA	Not-determined	NA	0	UK	0.0288866	No
Xie_HL_2016_CS_35505.scaffold66133_2_18295	GUT_GENOME255326_2_67944	18295	Unassigned		Methanobacteriota	Methanobacteria	Methanobacteriales	Methanobacteriaceae	Methanobrevibacter_A	Methanobrevibacter_A smithii	Outlier	No	NA	Not-determined	NA	0	UK	0.0304622	No
Xie_HL_2016_CS_35515.scaffold87917_1_118906	GUT_GENOME279910_4_62128	118906	Unassigned		Methanobacteriota	Methanobacteria	Methanobacteriales	Methanobacteriaceae	Methanobrevibacter_A	Methanobrevibacter_A smithii	VC_332_1	No	NA	Not-determined	NA	0	UK	0.00157563	No
Xie_HL_2016_CS_35519.scaffold64100_1_11820	GUT_GENOME269219_18_19456	11820	Unassigned		Methanobacteriota	Methanobacteria	Methanobacteriales	Methanobacteriaceae	Methanobrevibacter_A	Methanobrevibacter_A smithii	Outlier	No	NA	Low-quality	22.22	0	UK	0.00157563	No
Xie_HL_2016_CS_35519.scaffold64100_3_1600	GUT_GENOME269219_18_19456	1600	Unassigned		Methanobacteriota	Methanobacteria	Methanobacteriales	Methanobacteriaceae	Methanobrevibacter_A	Methanobrevibacter_A smithii	Outlier	No	NA	Not-determined	NA	0	UK	0.0341387	No
Xie_HL_2016_CS_35519.scaffold64100_4_14291	GUT_GENOME269219_18_19456	14291	Unassigned		Methanobacteriota	Methanobacteria	Methanobacteriales	Methanobacteriaceae	Methanobrevibacter_A	Methanobrevibacter_A smithii	Outlier	No	NA	Not-determined	NA	0	UK	0.0168067	No
Xie_HL_2016_CS_35519.scaffold96101_2_2981	GUT_GENOME262465_48_7516	2981	Unassigned		Methanobacteriota	Methanobacteria	Methanobacteriales	Methanobacteriaceae	Methanobrevibacter_A	Methanobrevibacter_A smithii	Outlier	No	NA	Not-determined	NA	0	UK	0.0194328	No
Xie_HL_2016_CS_35520.scaffold118805_3_48542	GUT_GENOME273630_6_80982	48542	Unassigned		Methanobacteriota	Methanobacteria	Methanobacteriales	Methanobacteriaceae	Methanobrevibacter_A	Methanobrevibacter_A smithii	Outlier	No	NA	Not-determined	NA	0	UK	0.00105042	No
Xie_HL_2016_CS_35520.scaffold72621_1_165	GUT_GENOME205625_22_393	165	Unassigned		Methanobacteriota	Methanobacteria	Methanobacteriales	Methanobacteriaceae	Methanobrevibacter_A	Methanobrevibacter_A smithii	Singleton	No	NA	Not-determined	NA	0	UK	0.00892857	Yes
Xie_HL_2016_CS_35520.scaffold72621_2_12135	GUT_GENOME205625_22_393	12135	Unassigned		Methanobacteriota	Methanobacteria	Methanobacteriales	Methanobacteriaceae	Methanobrevibacter_A	Methanobrevibacter_A smithii	VC_371_0	No	NA	Not-determined	NA	0	UK	0.00105042	No
Xie_HL_2016_CS_35520.scaffold72621_3_15290	GUT_GENOME205625_22_393	15290	Unassigned		Methanobacteriota	Methanobacteria	Methanobacteriales	Methanobacteriaceae	Methanobrevibacter_A	Methanobrevibacter_A smithii	Outlier	No	NA	Not-determined	NA	0	UK	0	No
Xie_HL_2016_CS_35549.scaffold122112_1_3762	GUT_GENOME143185_16_1306	3762	Unassigned		Methanobacteriota	Methanobacteria	Methanobacteriales	Methanobacteriaceae	Methanobrevibacter_A	Methanobrevibacter_A smithii_A	VC_369_0	No	NA	Not-determined	NA	0	UK	0.00157563	No
Xie_HL_2016_CS_35562.scaffold18486_3_118123	SRR9655013.NODE_1263_8534	118123	Duplodnaviria;Heunggongvirae;Uroviricota;Caudoviricetes;Caudovirales	VOGdb markers	Methanobacteriota	Methanobacteria	Methanobacteriales	Methanobacteriaceae	Methanobrevibacter_A	Methanobrevibacter_A smithii_A	VC_329_5	No	NA	Not-determined	NA	0	UK	0.029937	No
Xie_HL_2016_CS_35562.scaffold18486_5_31314	SRR9655013.NODE_1263_8534	31314	Unassigned		Methanobacteriota	Methanobacteria	Methanobacteriales	Methanobacteriaceae	Methanobrevibacter_A	Methanobrevibacter_A smithii_A	Outlier	No	NA	Not-determined	NA	0	UK	0	No
Xie_HL_2016_CS_35562.scaffold24433_1_218575	GUT_GENOME194277_1_111100	218575	Unassigned		Methanobacteriota	Methanobacteria	Methanobacteriales	Methanobacteriaceae	Methanobrevibacter_A	Methanobrevibacter_A smithii	VC_331_13	No	NA	Not-determined	NA	0	UK	0.0278361	No
Xie_HL_2016_CS_35562.scaffold26698_2_165916	GUT_GENOME143185_12_220085	165916	Unassigned		Methanobacteriota	Methanobacteria	Methanobacteriales	Methanobacteriaceae	Methanobrevibacter_A	Methanobrevibacter_A smithii_A	VC_334_1	No	NA	Not-determined	NA	0	UK	0.00367647	Yes
Xie_HL_2016_CS_35562.scaffold69368_1_119111	GUT_GENOME253955_2_249842	119111	Duplodnaviria;Heunggongvirae;Uroviricota;Caudoviricetes;Caudovirales;Myoviridae	VOGdb markers	Methanobacteriota	Methanobacteria	Methanobacteriales	Methanobacteriaceae	Methanobrevibacter_A	Methanobrevibacter_A smithii	VC_328_0	No	NA	Medium-quality	63.28	0	UK	0.0283613	No
Xie_HL_2016_CS_35562.scaffold91553_1_118173	GUT_GENOME247414_2_5385	118173	Duplodnaviria;Heunggongvirae;Uroviricota;Caudoviricetes;Caudovirales	VOGdb markers	Methanobacteriota	Methanobacteria	Methanobacteriales	Methanobacteriaceae	Methanobrevibacter_A	Methanobrevibacter_A smithii	VC_357_2	No	NA	Not-determined	NA	0	UK	0.0309874	Yes
Xie_HL_2016_CS_35563.scaffold101972_1_85657	GUT_GENOME279910_4_62128	85657	Unassigned		Methanobacteriota	Methanobacteria	Methanobacteriales	Methanobacteriaceae	Methanobrevibacter_A	Methanobrevibacter_A smithii	VC_332_1	No	NA	Not-determined	NA	0	UK	0.0257353	No
Xie_HL_2016_CS_35563.scaffold23499_2_145748	GUT_GENOME269219_18_19236	145748	Unassigned		Methanobacteriota	Methanobacteria	Methanobacteriales	Methanobacteriaceae	Methanobrevibacter_A	Methanobrevibacter_A smithii	VC_331_11	No	NA	Not-determined	NA	0	UK	0.0357143	No
Xie_HL_2016_CS_35563.scaffold32968_2_104081	GUT_GENOME093215_4_44917	104081	Unassigned		Methanobacteriota	Methanobacteria	Methanobacteriales	Methanobacteriaceae	Methanobrevibacter_A	Methanobrevibacter_A smithii	Outlier	No	NA	Not-determined	NA	0	UK	0.00315126	No
Xie_HL_2016_CS_35563.scaffold60995_1_22063	GUT_GENOME143185_16_1306	22063	Unassigned		Methanobacteriota	Methanobacteria	Methanobacteriales	Methanobacteriaceae	Methanobrevibacter_A	Methanobrevibacter_A smithii_A	Outlier	No	NA	Not-determined	NA	0	UK	0.0220588	No
Xie_HL_2016_CS_35563.scaffold60995_2_118354	GUT_GENOME143185_16_1306	118354	Duplodnaviria;Heunggongvirae;Uroviricota;Caudoviricetes;Caudovirales	VOGdb markers	Methanobacteriota	Methanobacteria	Methanobacteriales	Methanobacteriaceae	Methanobrevibacter_A	Methanobrevibacter_A smithii_A	VC_329_9	No	NA	Not-determined	NA	0	UK	0.0304622	No
Xie_HL_2016_CS_35630.scaffold57653_1_93339	GUT_GENOME194277_1_111100	93339	Unassigned		Methanobacteriota	Methanobacteria	Methanobacteriales	Methanobacteriaceae	Methanobrevibacter_A	Methanobrevibacter_A smithii	VC_331_12	No	NA	Not-determined	NA	0	UK	0.0367647	No
Xie_HL_2016_CS_35654.scaffold106_1_248437	GUT_GENOME258086_2_60997	248437	Unassigned		Methanobacteriota	Methanobacteria	Methanobacteriales	Methanobacteriaceae	Methanobrevibacter_A	Methanobrevibacter_A smithii	VC_356_1	No	NA	Not-determined	NA	0	UK	0.0252101	No
Xie_HL_2016_CS_35654.scaffold109994_1_65294	ERR688624.NODE_1318_21	65294	Unassigned		Methanobacteriota	Methanobacteria	Methanobacteriales	Methanobacteriaceae	Methanobrevibacter_A	Methanobrevibacter_A smithii	Outlier	No	NA	Not-determined	NA	0	UK	0.0283613	No
Xie_HL_2016_CS_35654.scaffold1452_1_89046	GUT_GENOME093215_4_44917	89046	Unassigned		Methanobacteriota	Methanobacteria	Methanobacteriales	Methanobacteriaceae	Methanobrevibacter_A	Methanobrevibacter_A smithii	Outlier	No	NA	Not-determined	NA	0	UK	0.0231092	No
Xie_HL_2016_CS_35654.scaffold2165_1_89154	GUT_GENOME246782_8_59663	89154	Unassigned		Methanobacteriota	Methanobacteria	Methanobacteriales	Methanobacteriaceae	Methanobrevibacter_A	Methanobrevibacter_A smithii	Outlier	No	NA	Not-determined	NA	0	UK	0.0273109	No
Xie_HL_2016_CS_35654.scaffold26407_1_142886	GUT_GENOME143185_12_220085	142886	Unassigned		Methanobacteriota	Methanobacteria	Methanobacteriales	Methanobacteriaceae	Methanobrevibacter_A	Methanobrevibacter_A smithii_A	VC_334_0	No	NA	Not-determined	NA	0	UK	0.00210084	Yes
Xie_HL_2016_CS_35654.scaffold67115_1_169563	GUT_GENOME247414_2_5385	169563	Duplodnaviria;Heunggongvirae;Uroviricota;Caudoviricetes;Caudovirales	VOGdb markers	Methanobacteriota	Methanobacteria	Methanobacteriales	Methanobacteriaceae	Methanobrevibacter_A	Methanobrevibacter_A smithii	VC_357_1	No	NA	Medium-quality	85.12	0	UK	0.00157563	Yes
Xie_HL_2016_CS_35654.scaffold74956_4_29331	GUT_GENOME279910_4_62128	29331	Unassigned		Methanobacteriota	Methanobacteria	Methanobacteriales	Methanobacteriaceae	Methanobrevibacter_A	Methanobrevibacter_A smithii	Outlier	No	NA	Not-determined	NA	0	UK	0.00052521	No
Xie_HL_2016_CS_35665.scaffold130883_1_7991	GUT_GENOME273866_45_581	7991	Unassigned		Methanobacteriota	Methanobacteria	Methanobacteriales	Methanobacteriaceae	Methanobrevibacter_A	Methanobrevibacter_A smithii	Overlap (VC_367/VC_373)	No	NA	Low-quality	20.93	0	UK	0.00052521	No
Xie_HL_2016_CS_35665.scaffold85749_1_17257	GUT_GENOME135949_10_18600	17257	Unassigned		Methanobacteriota	Methanobacteria	Methanobacteriales	Methanobacteriaceae	Methanobrevibacter_A	Methanobrevibacter_A smithii	Outlier	No	NA	Low-quality	10.64	0	UK	0.00315126	No
Xie_HL_2016_CS_35707.scaffold1337_1_79733	GUT_GENOME093215_4_44917	79733	Unassigned		Methanobacteriota	Methanobacteria	Methanobacteriales	Methanobacteriaceae	Methanobrevibacter_A	Methanobrevibacter_A smithii	Outlier	No	NA	Not-determined	NA	0	UK	0.0246849	No
Xie_HL_2016_CS_35707.scaffold1337_6_12025	GUT_GENOME135949_10_18798	12025	Unassigned		Methanobacteriota	Methanobacteria	Methanobacteriales	Methanobacteriaceae	Methanobrevibacter_A	Methanobrevibacter_A smithii	VC_363_0	No	NA	Low-quality	1.9	0	UK	0.00367647	No
Xie_HL_2016_CS_35707.scaffold22361_11_21628	GUT_GENOME284814_21_22677	21628	Unassigned		Methanobacteriota	Methanobacteria	Methanobacteriales	Methanobacteriaceae	Methanobrevibacter_A	Methanobrevibacter_A smithii_A	VC_360_0	No	NA	Not-determined	NA	0	UK	0.029937	No
Xie_HL_2016_CS_35707.scaffold22361_12_12943	GUT_GENOME284814_21_22677	12943	Unassigned		Methanobacteriota	Methanobacteria	Methanobacteriales	Methanobacteriaceae	Methanobrevibacter_A	Methanobrevibacter_A smithii_A	VC_364_0	No	NA	Not-determined	NA	0	UK	0.0336134	No
Xie_HL_2016_CS_35707.scaffold22361_4_29738	GUT_GENOME259830_2_112204	29738	Unassigned		Methanobacteriota	Methanobacteria	Methanobacteriales	Methanobacteriaceae	Methanobrevibacter_A	Methanobrevibacter_A smithii	Outlier	No	NA	Not-determined	NA	0	UK	0.00210084	No
Xie_HL_2016_CS_35707.scaffold22361_5_48060	GUT_GENOME259830_2_112204	48060	Unassigned		Methanobacteriota	Methanobacteria	Methanobacteriales	Methanobacteriaceae	Methanobrevibacter_A	Methanobrevibacter_A smithii	Outlier	No	NA	Not-determined	NA	0	UK	0.0294118	No
Xie_HL_2016_CS_35707.scaffold22361_7_7464	GUT_GENOME259830_2_112204	7464	Unassigned		Methanobacteriota	Methanobacteria	Methanobacteriales	Methanobacteriaceae	Methanobrevibacter_A	Methanobrevibacter_A smithii	Outlier	No	NA	Not-determined	NA	0	UK	0.00052521	No
Xie_HL_2016_CS_35707.scaffold87213_1_16350	GUT_GENOME247414_2_5385	16350	Unassigned		Methanobacteriota	Methanobacteria	Methanobacteriales	Methanobacteriaceae	Methanobrevibacter_A	Methanobrevibacter_A smithii	Outlier	No	NA	Low-quality	29.9	0	UK	0.00157563	No
Xie_HL_2016_CS_35707.scaffold87213_2_118447	GUT_GENOME247414_2_5385	118447	Duplodnaviria;Heunggongvirae;Uroviricota;Caudoviricetes;Caudovirales	VOGdb markers	Methanobacteriota	Methanobacteria	Methanobacteriales	Methanobacteriaceae	Methanobrevibacter_A	Methanobrevibacter_A smithii	VC_357_1	No	NA	Not-determined	NA	0	UK	0	Yes
Xie_HL_2016_CS_35707.scaffold91487_1_121046	GUT_GENOME247693_325_79	121046	Unassigned		Methanobacteriota	Methanobacteria	Methanobacteriales	Methanobacteriaceae	Methanobrevibacter_A	Methanobrevibacter_A smithii	VC_331_3	No	NA	Not-determined	NA	0	UK	0.0367647	No
Xie_HL_2016_CS_35989.scaffold11518_2_83151	GUT_GENOME282742_6_115569	83151	Unassigned		Methanobacteriota	Methanobacteria	Methanobacteriales	Methanobacteriaceae	Methanobrevibacter_A	Methanobrevibacter_A smithii	Outlier	No	NA	Not-determined	NA	0	UK	0	No
Xie_HL_2016_CS_35989.scaffold11518_4_116598	GUT_GENOME143185_12_220085	116598	Unassigned		Methanobacteriota	Methanobacteria	Methanobacteriales	Methanobacteriaceae	Methanobrevibacter_A	Methanobrevibacter_A smithii_A	VC_334_1	No	NA	Not-determined	NA	0	UK	0.0131303	Yes
Xie_HL_2016_CS_35989.scaffold115395_1_103110	GUT_GENOME247693_325_79	103110	Unassigned		Methanobacteriota	Methanobacteria	Methanobacteriales	Methanobacteriaceae	Methanobrevibacter_A	Methanobrevibacter_A smithii	VC_331_3	No	NA	Not-determined	NA	0	UK	0.0252101	No
Xie_HL_2016_CS_35989.scaffold12178_1_80263	GUT_GENOME093215_4_44917	80263	Unassigned		Methanobacteriota	Methanobacteria	Methanobacteriales	Methanobacteriaceae	Methanobrevibacter_A	Methanobrevibacter_A smithii	Outlier	No	NA	Not-determined	NA	0	UK	0.0315126	No
Xie_HL_2016_CS_35989.scaffold134214_2_75269	GUT_GENOME283261_25_13131	75269	Unassigned		Methanobacteriota	Methanobacteria	Methanobacteriales	Methanobacteriaceae	Methanobrevibacter_A	Methanobrevibacter_A smithii	Outlier	No	NA	Not-determined	NA	0	UK	0.0173319	No
Xie_HL_2016_CS_35990.scaffold124878_3_97788	GUT_GENOME247693_325_79	97788	Unassigned		Methanobacteriota	Methanobacteria	Methanobacteriales	Methanobacteriaceae	Methanobrevibacter_A	Methanobrevibacter_A smithii	VC_331_3	No	NA	Not-determined	NA	0	UK	0.0178571	No
Xie_HL_2016_CS_35990.scaffold127790_3_52045	GUT_GENOME273866_45_581	52045	Unassigned		Methanobacteriota	Methanobacteria	Methanobacteriales	Methanobacteriaceae	Methanobrevibacter_A	Methanobrevibacter_A smithii	Outlier	No	NA	Medium-quality	68.87	0	UK	0.00210084	No
Xie_HL_2016_CS_35990.scaffold129521_1_67548	GUT_GENOME011061_10_783	67548	Duplodnaviria;Heunggongvirae;Uroviricota;Caudoviricetes;Caudovirales	VOGdb markers	Methanobacteriota	Methanobacteria	Methanobacteriales	Methanobacteriaceae	Methanobrevibacter_A	Methanobrevibacter_A smithii	VC_329_5	No	NA	Not-determined	NA	0	UK	0.00105042	No
Xie_HL_2016_CS_35990.scaffold30438_2_46786	GUT_GENOME279910_4_62128	46786	Unassigned		Methanobacteriota	Methanobacteria	Methanobacteriales	Methanobacteriaceae	Methanobrevibacter_A	Methanobrevibacter_A smithii	VC_332_1	No	NA	Not-determined	NA	0	UK	0.00105042	No
Xie_HL_2016_CS_35990.scaffold30438_5_7177	GUT_GENOME279910_4_62128	7177	Unassigned		Methanobacteriota	Methanobacteria	Methanobacteriales	Methanobacteriaceae	Methanobrevibacter_A	Methanobrevibacter_A smithii	Outlier	No	NA	Not-determined	NA	0	UK	0.00157563	No
Xie_HL_2016_CS_35990.scaffold43883_1_9721	GUT_GENOME284814_21_22677	9721	Unassigned		Methanobacteriota	Methanobacteria	Methanobacteriales	Methanobacteriaceae	Methanobrevibacter_A	Methanobrevibacter_A smithii_A	VC_364_0	No	NA	Low-quality	9	0	UK	0	No
Xie_HL_2016_CS_35990.scaffold57795_1_94669	ERR688624.NODE_1318_21	94669	Duplodnaviria;Heunggongvirae;Uroviricota;Caudoviricetes;Caudovirales;Myoviridae	VOGdb markers	Methanobacteriota	Methanobacteria	Methanobacteriales	Methanobacteriaceae	Methanobrevibacter_A	Methanobrevibacter_A smithii	VC_328_0	No	NA	Not-determined	NA	0	UK	0.00105042	No
Xie_HL_2016_CS_35992.scaffold103265_1_45936	GUT_GENOME247693_325_79	45936	Unassigned		Methanobacteriota	Methanobacteria	Methanobacteriales	Methanobacteriaceae	Methanobrevibacter_A	Methanobrevibacter_A smithii	Outlier	No	NA	Not-determined	NA	0	UK	0.00157563	No
Xie_HL_2016_CS_35992.scaffold104100_2_7499	GUT_GENOME130062_8_97461	7499	Unassigned		Methanobacteriota	Methanobacteria	Methanobacteriales	Methanobacteriaceae	Methanobrevibacter_A	Methanobrevibacter_A smithii	Outlier	No	NA	Not-determined	NA	0	UK	0.00052521	No
Xie_HL_2016_CS_35992.scaffold108499_1_31010	GUT_GENOME230857_21_44924	31010	Unassigned		Methanobacteriota	Methanobacteria	Methanobacteriales	Methanobacteriaceae	Methanobrevibacter_A	Methanobrevibacter_A smithii	Outlier	No	NA	Medium-quality	56.91	0	UK	0	Yes
Xie_HL_2016_CS_35992.scaffold110959_1_23778	GUT_GENOME067420_22_1845	23778	Unassigned		Methanobacteriota	Methanobacteria	Methanobacteriales	Methanobacteriaceae	Methanobrevibacter_A	Methanobrevibacter_A smithii	Outlier	No	NA	Not-determined	NA	0	UK	0.0257353	No
Xie_HL_2016_CS_35992.scaffold48537_1_77670	GUT_GENOME011061_10_783	77670	Duplodnaviria;Heunggongvirae;Uroviricota;Caudoviricetes;Caudovirales	VOGdb markers	Methanobacteriota	Methanobacteria	Methanobacteriales	Methanobacteriaceae	Methanobrevibacter_A	Methanobrevibacter_A smithii	VC_329_5	No	NA	Not-determined	NA	0	UK	0.00105042	No
Xie_HL_2016_CS_35992.scaffold88527_1_57354	ERR688624.NODE_1318_21	57354	Unassigned		Methanobacteriota	Methanobacteria	Methanobacteriales	Methanobacteriaceae	Methanobrevibacter_A	Methanobrevibacter_A smithii	Outlier	No	NA	Not-determined	NA	0	UK	0.0346639	No
Xie_HL_2016_CS_35992.scaffold98135_1_61974	GUT_GENOME253955_2_249842	61974	Duplodnaviria;Heunggongvirae;Uroviricota;Caudoviricetes;Caudovirales;Myoviridae	VOGdb markers	Methanobacteriota	Methanobacteria	Methanobacteriales	Methanobacteriaceae	Methanobrevibacter_A	Methanobrevibacter_A smithii	VC_328_0	No	NA	Not-determined	NA	0	UK	0.00787815	No
Xie_HL_2016_CS_35999.scaffold102461_1_112905	GUT_GENOME261695_15_32706	112905	Duplodnaviria;Heunggongvirae;Uroviricota;Caudoviricetes;Caudovirales	VOGdb markers	Methanobacteriota	Methanobacteria	Methanobacteriales	Methanobacteriaceae	Methanobrevibacter_A	Methanobrevibacter_A smithii	VC_327_4	No	NA	Not-determined	NA	0	UK	0.128676	No
Xie_HL_2016_CS_35999.scaffold102461_2_182079	GUT_GENOME143185_16_1306	182079	Duplodnaviria;Heunggongvirae;Uroviricota;Caudoviricetes;Caudovirales	VOGdb markers	Methanobacteriota	Methanobacteria	Methanobacteriales	Methanobacteriaceae	Methanobrevibacter_A	Methanobrevibacter_A smithii_A	VC_329_6	No	NA	Not-determined	NA	0	UK	0.0252101	No
Xie_HL_2016_CS_35999.scaffold114560_1_80236	ERR688624.NODE_1318_21	80236	Unassigned		Methanobacteriota	Methanobacteria	Methanobacteriales	Methanobacteriaceae	Methanobrevibacter_A	Methanobrevibacter_A smithii	Outlier	No	NA	Low-quality	6.65	0	UK	0.0241597	No
Xie_HL_2016_CS_35999.scaffold11746_1_234362	GUT_GENOME194277_1_111100	234362	Unassigned		Methanobacteriota	Methanobacteria	Methanobacteriales	Methanobacteriaceae	Methanobrevibacter_A	Methanobrevibacter_A smithii	VC_331_13	No	NA	Not-determined	NA	0	UK	0.00052521	No
Xie_HL_2016_CS_35999.scaffold1775_2_184104	GUT_GENOME258086_2_60997	184104	Unassigned		Methanobacteriota	Methanobacteria	Methanobacteriales	Methanobacteriaceae	Methanobrevibacter_A	Methanobrevibacter_A smithii	VC_356_4	No	NA	Not-determined	NA	0	UK	0.00157563	No
Xie_HL_2016_CS_35999.scaffold30013_1_169745	GUT_GENOME143185_12_220085	169745	Unassigned		Methanobacteriota	Methanobacteria	Methanobacteriales	Methanobacteriaceae	Methanobrevibacter_A	Methanobrevibacter_A smithii_A	VC_334_1	No	NA	Not-determined	NA	0	UK	0.0131303	Yes
Xie_HL_2016_CS_36000.scaffold1145_2_197628	GUT_GENOME258086_2_60997	197628	Unassigned		Methanobacteriota	Methanobacteria	Methanobacteriales	Methanobacteriaceae	Methanobrevibacter_A	Methanobrevibacter_A smithii	VC_356_2	No	NA	Not-determined	NA	0	UK	0.0330882	No
Xie_HL_2016_CS_36000.scaffold21340_5_152601	GUT_GENOME143185_12_220085	152601	Unassigned		Methanobacteriota	Methanobacteria	Methanobacteriales	Methanobacteriaceae	Methanobrevibacter_A	Methanobrevibacter_A smithii_A	VC_334_1	No	NA	Not-determined	NA	0	UK	0.0294118	Yes
Xie_HL_2016_CS_36000.scaffold46923_2_161192	GUT_GENOME247414_2_5385	161192	Duplodnaviria;Heunggongvirae;Uroviricota;Caudoviricetes;Caudovirales	VOGdb markers	Methanobacteriota	Methanobacteria	Methanobacteriales	Methanobacteriaceae	Methanobrevibacter_A	Methanobrevibacter_A smithii	VC_357_4	No	NA	Not-determined	NA	0	UK	0.0120798	Yes
Xie_HL_2016_CS_36000.scaffold73201_5_38698	GUT_GENOME194277_1_110295	38698	Unassigned		Methanobacteriota	Methanobacteria	Methanobacteriales	Methanobacteriaceae	Methanobrevibacter_A	Methanobrevibacter_A smithii	Outlier	No	NA	Not-determined	NA	0	UK	0.0152311	No
Xie_HL_2016_CS_36005.scaffold113858_1_5916	GUT_GENOME105435_8_56410	5916	Unassigned		Methanobacteriota	Methanobacteria	Methanobacteriales	Methanobacteriaceae	Methanobrevibacter_A	Methanobrevibacter_A smithii	Outlier	No	NA	Low-quality	11.12	0	UK	0.00105042	Yes
Xie_HL_2016_CS_36005.scaffold78006_1_111473	GUT_GENOME246782_8_59663	111473	Unassigned		Methanobacteriota	Methanobacteria	Methanobacteriales	Methanobacteriaceae	Methanobrevibacter_A	Methanobrevibacter_A smithii	VC_331_3	No	NA	Not-determined	NA	0	UK	0.00315126	No
Xie_HL_2016_CS_36006.scaffold114527_1_4322	ERR688624.NODE_1318_21	4322	Unassigned		Methanobacteriota	Methanobacteria	Methanobacteriales	Methanobacteriaceae	Methanobrevibacter_A	Methanobrevibacter_A smithii	Singleton	No	NA	Not-determined	NA	0	UK	0.00105042	No
Xie_HL_2016_CS_36006.scaffold114527_2_30274	ERR688624.NODE_1318_21	30274	Unassigned		Methanobacteriota	Methanobacteria	Methanobacteriales	Methanobacteriaceae	Methanobrevibacter_A	Methanobrevibacter_A smithii	Outlier	No	NA	Not-determined	NA	0	UK	0.00157563	No
Xie_HL_2016_CS_36006.scaffold34187_1_107241	GUT_GENOME284410_17_34955	107241	Unassigned		Methanobacteriota	Methanobacteria	Methanobacteriales	Methanobacteriaceae	Methanobrevibacter_A	Methanobrevibacter_A smithii	Outlier	No	NA	Not-determined	NA	0	UK	0.0183824	No
Xie_HL_2016_CS_36006.scaffold55044_1_65919	GUT_GENOME143185_16_1306	65919	Unassigned		Methanobacteriota	Methanobacteria	Methanobacteriales	Methanobacteriaceae	Methanobrevibacter_A	Methanobrevibacter_A smithii_A	Outlier	No	NA	Not-determined	NA	0	UK	0.00210084	No
Xie_HL_2016_CS_36006.scaffold68835_1_86879	GUT_GENOME251364_2_123712	86879	Unassigned		Methanobacteriota	Methanobacteria	Methanobacteriales	Methanobacteriaceae	Methanobrevibacter_A	Methanobrevibacter_A smithii_A	VC_331_3	No	NA	Not-determined	NA	0	UK	0.0257353	No
Xie_HL_2016_CS_36012.scaffold1300_2_148066	GUT_GENOME258086_2_60997	148066	Unassigned		Methanobacteriota	Methanobacteria	Methanobacteriales	Methanobacteriaceae	Methanobrevibacter_A	Methanobrevibacter_A smithii	VC_356_2	No	NA	Not-determined	NA	0	UK	0.00105042	No
Xie_HL_2016_CS_36012.scaffold71232_1_114204	GUT_GENOME143185_12_220085	114204	Unassigned		Methanobacteriota	Methanobacteria	Methanobacteriales	Methanobacteriaceae	Methanobrevibacter_A	Methanobrevibacter_A smithii_A	VC_334_1	No	NA	Not-determined	NA	0	UK	0.0309874	Yes
Xie_HL_2016_CS_36012.scaffold73653_1_218529	SRR9655013.NODE_1263_8534	218529	Duplodnaviria;Heunggongvirae;Uroviricota;Caudoviricetes;Caudovirales	VOGdb markers	Methanobacteriota	Methanobacteria	Methanobacteriales	Methanobacteriaceae	Methanobrevibacter_A	Methanobrevibacter_A smithii_A	VC_329_8	No	NA	Not-determined	NA	0	UK	0.022584	No
Xie_HL_2016_CS_36012.scaffold75089_1_233279	GUT_GENOME194277_1_111100	233279	Unassigned		Methanobacteriota	Methanobacteria	Methanobacteriales	Methanobacteriaceae	Methanobrevibacter_A	Methanobrevibacter_A smithii	VC_331_13	No	NA	Not-determined	NA	0	UK	0.0162815	No
Xie_HL_2016_CS_36012.scaffold78329_1_143849	GUT_GENOME247414_2_5385	143849	Duplodnaviria;Heunggongvirae;Uroviricota;Caudoviricetes;Caudovirales	VOGdb markers	Methanobacteriota	Methanobacteria	Methanobacteriales	Methanobacteriaceae	Methanobrevibacter_A	Methanobrevibacter_A smithii	VC_357_1	No	NA	Not-determined	NA	0	UK	0.0178571	Yes
Xie_HL_2016_CS_36033.scaffold22057_1_1691	GUT_GENOME272466_3_105742	1691	Unassigned		Methanobacteriota	Methanobacteria	Methanobacteriales	Methanobacteriaceae	Methanobrevibacter_A	Methanobrevibacter_A smithii	VC_367_0	No	NA	Low-quality	4.34	0	UK	0.00210084	Yes
Xie_HL_2016_CS_36033.scaffold83623_1_52717	GUT_GENOME239133_175_27290	52717	Duplodnaviria;Heunggongvirae;Uroviricota;Caudoviricetes;Caudovirales	Viral database	Methanobacteriota	Methanobacteria	Methanobacteriales	Methanobacteriaceae	Methanobrevibacter_A	Methanobrevibacter_A smithii_A	VC_358_0	No	NA	High-quality	99.09	0	UK	0	Yes
Xie_HL_2016_CS_36055.scaffold12661_2_91921	GUT_GENOME279910_4_62128	91921	Unassigned		Methanobacteriota	Methanobacteria	Methanobacteriales	Methanobacteriaceae	Methanobrevibacter_A	Methanobrevibacter_A smithii	VC_332_1	No	NA	Not-determined	NA	0	UK	0.0215336	No
Xie_HL_2016_CS_36055.scaffold1566_1_78380	GUT_GENOME205625_22_393	78380	Duplodnaviria;Heunggongvirae;Uroviricota;Caudoviricetes;Caudovirales	VOGdb markers	Methanobacteriota	Methanobacteria	Methanobacteriales	Methanobacteriaceae	Methanobrevibacter_A	Methanobrevibacter_A smithii	VC_327_4	No	NA	Not-determined	NA	0	UK	0.00892857	No
Xie_HL_2016_CS_36055.scaffold20563_1_48432	GUT_GENOME259830_2_112204	48432	Unassigned		Methanobacteriota	Methanobacteria	Methanobacteriales	Methanobacteriaceae	Methanobrevibacter_A	Methanobrevibacter_A smithii	Outlier	No	NA	Not-determined	NA	0	UK	0.0362395	No
Xie_HL_2016_CS_36055.scaffold38_1_181433	GUT_GENOME143185_12_220085	181433	Unassigned		Methanobacteriota	Methanobacteria	Methanobacteriales	Methanobacteriaceae	Methanobrevibacter_A	Methanobrevibacter_A smithii_A	VC_334_1	No	NA	Not-determined	NA	0	UK	0.0162815	Yes
Xie_HL_2016_CS_36055.scaffold40427_1_140066	GUT_GENOME246782_8_59663	140066	Unassigned		Methanobacteriota	Methanobacteria	Methanobacteriales	Methanobacteriaceae	Methanobrevibacter_A	Methanobrevibacter_A smithii	VC_331_11	No	NA	Not-determined	NA	0	UK	0.00052521	No
Xie_HL_2016_CS_36055.scaffold54287_1_22645	GUT_GENOME143185_16_1306	22645	Unassigned		Methanobacteriota	Methanobacteria	Methanobacteriales	Methanobacteriaceae	Methanobrevibacter_A	Methanobrevibacter_A smithii_A	VC_360_0	No	NA	Not-determined	NA	0	UK	0.0267857	No
Xie_HL_2016_CS_36055.scaffold6108_1_281705	GUT_GENOME258086_2_60997	281705	Unassigned		Methanobacteriota	Methanobacteria	Methanobacteriales	Methanobacteriaceae	Methanobrevibacter_A	Methanobrevibacter_A smithii	VC_356_1	No	NA	Not-determined	NA	0	UK	0.0162815	No
Xie_HL_2016_CS_36055.scaffold6108_2_31176	GUT_GENOME258086_2_60997	31176	Unassigned		Methanobacteriota	Methanobacteria	Methanobacteriales	Methanobacteriaceae	Methanobrevibacter_A	Methanobrevibacter_A smithii	Outlier	No	NA	Not-determined	NA	0	UK	0	No
Xie_HL_2016_CS_36057.scaffold45820_1_1039	GUT_GENOME268814_20_211	1039	Unassigned		Methanobacteriota	Methanobacteria	Methanobacteriales	Methanobacteriaceae	Methanobrevibacter_A	Methanobrevibacter_A smithii	Singleton	No	NA	Not-determined	NA	0	UK	0.00052521	No
Xie_HL_2016_CS_36057.scaffold56713_2_168	GUT_GENOME096906_93_1992	168	Unassigned		Methanobacteriota	Methanobacteria	Methanobacteriales	Methanobacteriaceae	Methanobrevibacter_A	Methanobrevibacter_A smithii_A	Singleton	No	NA	Not-determined	NA	0	UK	0.00052521	Yes
Xie_HL_2016_CS_36057.scaffold70675_3_836	GUT_GENOME269311_7_91475	836	Unassigned		Methanobacteriota	Methanobacteria	Methanobacteriales	Methanobacteriaceae	Methanobrevibacter_A	Methanobrevibacter_A smithii	Outlier	No	NA	Low-quality	1.57	0	UK	0.00052521	No
Xie_HL_2016_CS_36058.scaffold131499_1_2166	GUT_GENOME270019_28_10373	2166	Duplodnaviria;Heunggongvirae;Uroviricota;Caudoviricetes;Caudovirales	VOGdb markers	Methanobacteriota	Methanobacteria	Methanobacteriales	Methanobacteriaceae	Methanobrevibacter_A	Methanobrevibacter_A smithii	VC_396_0	No	NA	Low-quality	4.07	0	UK	0.00052521	No
Xie_HL_2016_CS_36058.scaffold154767_4_1883	GUT_GENOME094374_1_68095	1883	Unassigned		Methanobacteriota	Methanobacteria	Methanobacteriales	Methanobacteriaceae	Methanobrevibacter_A	Methanobrevibacter_A smithii	Singleton	No	NA	Not-determined	NA	0	UK	0.0220588	No
Xie_HL_2016_CS_36116.scaffold17147_2_66815	GUT_GENOME259830_2_112204	66815	Unassigned		Methanobacteriota	Methanobacteria	Methanobacteriales	Methanobacteriaceae	Methanobrevibacter_A	Methanobrevibacter_A smithii	Outlier	No	NA	Not-determined	NA	0	UK	0.0246849	No
Xie_HL_2016_CS_36116.scaffold62722_2_198491	GUT_GENOME269219_18_19236	198491	Unassigned		Methanobacteriota	Methanobacteria	Methanobacteriales	Methanobacteriaceae	Methanobrevibacter_A	Methanobrevibacter_A smithii	VC_331_13	No	NA	Not-determined	NA	0	UK	0.0204832	No
Xie_HL_2016_CS_36116.scaffold68028_1_135325	GUT_GENOME011061_10_783	135325	Duplodnaviria;Heunggongvirae;Uroviricota;Caudoviricetes;Caudovirales	VOGdb markers	Methanobacteriota	Methanobacteria	Methanobacteriales	Methanobacteriaceae	Methanobrevibacter_A	Methanobrevibacter_A smithii	VC_329_5	No	NA	Not-determined	NA	0	UK	0.00105042	No
Xie_HL_2016_CS_36116.scaffold68433_1_33775	GUT_GENOME273866_45_581	33775	Unassigned		Methanobacteriota	Methanobacteria	Methanobacteriales	Methanobacteriaceae	Methanobrevibacter_A	Methanobrevibacter_A smithii	Outlier	No	NA	Medium-quality	88.58	0	UK	0	Yes
Xie_HL_2016_CS_36116.scaffold814_1_360048	GUT_GENOME258086_2_60997	360048	Duplodnaviria;Heunggongvirae;Uroviricota;Caudoviricetes;Caudovirales	VOGdb markers	Methanobacteriota	Methanobacteria	Methanobacteriales	Methanobacteriaceae	Methanobrevibacter_A	Methanobrevibacter_A smithii	Overlap (VC_357/VC_358)	No	NA	Not-determined	NA	0	UK	0.00420168	Yes
Xie_HL_2016_CS_36244.C1580966_1_7433	ERR589790.NODE_500_187	7433	Duplodnaviria;Heunggongvirae;Uroviricota;Caudoviricetes;Caudovirales	VOGdb markers	Methanobacteriota	Methanobacteria	Methanobacteriales	Methanobacteriaceae	Methanobrevibacter_A	Methanobrevibacter_A smithii	VC_380_0	No	NA	Low-quality	13.64	0	UK	0.00052521	Yes
Xie_HL_2016_CS_36244.C548080_1_195	CCIS33816588ST-4-0.NODE_150_67199	195	Unassigned		Methanobacteriota	Methanobacteria	Methanobacteriales	Methanobacteriaceae	Methanobrevibacter_A	Methanobrevibacter_A smithii	Singleton	No	NA	Not-determined	NA	0	UK	0.00892857	Yes
Xie_HL_2016_CS_36244.scaffold130416_1_1905	GUT_GENOME135949_10_18072	1905	Unassigned		Methanobacteriota	Methanobacteria	Methanobacteriales	Methanobacteriaceae	Methanobrevibacter_A	Methanobrevibacter_A smithii	VC_510_0	No	NA	Low-quality	4.82	0	UK	0.00787815	No
Xie_HL_2016_CS_36244.scaffold1661_3_80925	GUT_GENOME143185_16_1306	80925	Unassigned		Methanobacteriota	Methanobacteria	Methanobacteriales	Methanobacteriaceae	Methanobrevibacter_A	Methanobrevibacter_A smithii_A	Outlier	No	NA	Not-determined	NA	0	UK	0.0210084	No
Xie_HL_2016_CS_36244.scaffold5470_1_25077	GUT_GENOME259830_2_112204	25077	Unassigned		Methanobacteriota	Methanobacteria	Methanobacteriales	Methanobacteriaceae	Methanobrevibacter_A	Methanobrevibacter_A smithii	Outlier	No	NA	Not-determined	NA	0	UK	0.0341387	No
Xie_HL_2016_CS_36439.scaffold1124_2_19628	ERR688624.NODE_1318_21	19628	Unassigned		Methanobacteriota	Methanobacteria	Methanobacteriales	Methanobacteriaceae	Methanobrevibacter_A	Methanobrevibacter_A smithii	Outlier	No	NA	Not-determined	NA	0	UK	0.00157563	No
Xie_HL_2016_CS_36439.scaffold1124_3_42294	ERR688624.NODE_1318_21	42294	Unassigned		Methanobacteriota	Methanobacteria	Methanobacteriales	Methanobacteriaceae	Methanobrevibacter_A	Methanobrevibacter_A smithii	Outlier	No	NA	Low-quality	3.5	0	UK	0.00157563	No
Xie_HL_2016_CS_36439.scaffold1497_1_78634	GUT_GENOME093215_4_44917	78634	Unassigned		Methanobacteriota	Methanobacteria	Methanobacteriales	Methanobacteriaceae	Methanobrevibacter_A	Methanobrevibacter_A smithii	Outlier	No	NA	Not-determined	NA	0	UK	0.00210084	No
Xie_HL_2016_CS_36439.scaffold61576_2_201585	GUT_GENOME194277_1_111100	201585	Unassigned		Methanobacteriota	Methanobacteria	Methanobacteriales	Methanobacteriaceae	Methanobrevibacter_A	Methanobrevibacter_A smithii	VC_331_13	No	NA	Not-determined	NA	0	UK	0.0351891	No
Xie_HL_2016_CS_36439.scaffold88529_1_92038	GUT_GENOME259830_2_112204	92038	Unassigned		Methanobacteriota	Methanobacteria	Methanobacteriales	Methanobacteriaceae	Methanobrevibacter_A	Methanobrevibacter_A smithii	Outlier	No	NA	Not-determined	NA	0	UK	0.00210084	No
Xie_HL_2016_CS_36439.scaffold95026_1_238818	GUT_GENOME247414_2_5385	238818	Duplodnaviria;Heunggongvirae;Uroviricota;Caudoviricetes;Caudovirales	VOGdb markers	Methanobacteriota	Methanobacteria	Methanobacteriales	Methanobacteriaceae	Methanobrevibacter_A	Methanobrevibacter_A smithii	VC_357_6	No	NA	Not-determined	NA	0	UK	0.0204832	Yes
Xie_HL_2016_CS_36439.scaffold95134_1_82098	GUT_GENOME279910_4_62128	82098	Unassigned		Methanobacteriota	Methanobacteria	Methanobacteriales	Methanobacteriaceae	Methanobrevibacter_A	Methanobrevibacter_A smithii	VC_332_1	No	NA	Not-determined	NA	0	UK	0.012605	No
Xie_HL_2016_CS_36521.scaffold102867_1_87990	GUT_GENOME269219_18_19236	87990	Unassigned		Methanobacteriota	Methanobacteria	Methanobacteriales	Methanobacteriaceae	Methanobrevibacter_A	Methanobrevibacter_A smithii	VC_331_3	No	NA	Not-determined	NA	0	UK	0.00105042	No
Xie_HL_2016_CS_36521.scaffold102867_4_40494	GUT_GENOME269219_18_19236	40494	Unassigned		Methanobacteriota	Methanobacteria	Methanobacteriales	Methanobacteriaceae	Methanobrevibacter_A	Methanobrevibacter_A smithii	Outlier	No	NA	Not-determined	NA	0	UK	0.0152311	No
Xie_HL_2016_CS_36521.scaffold575_2_172204	GUT_GENOME143185_12_220085	172204	Unassigned		Methanobacteriota	Methanobacteria	Methanobacteriales	Methanobacteriaceae	Methanobrevibacter_A	Methanobrevibacter_A smithii_A	VC_334_1	No	NA	High-quality	100	0	UK	0.0215336	Yes
Xie_HL_2016_CS_36521.scaffold67826_2_41155	GUT_GENOME259830_2_112204	41155	Unassigned		Methanobacteriota	Methanobacteria	Methanobacteriales	Methanobacteriaceae	Methanobrevibacter_A	Methanobrevibacter_A smithii	Outlier	No	NA	Not-determined	NA	0	UK	0.012605	No
Xie_HL_2016_CS_36521.scaffold8237_3_78103	GUT_GENOME093215_4_44917	78103	Unassigned		Methanobacteriota	Methanobacteria	Methanobacteriales	Methanobacteriaceae	Methanobrevibacter_A	Methanobrevibacter_A smithii	Outlier	No	NA	Not-determined	NA	0	UK	0.00787815	No
Xie_HL_2016_CS_36522.scaffold8016_1_242836	GUT_GENOME247414_2_5385	242836	Duplodnaviria;Heunggongvirae;Uroviricota;Caudoviricetes;Caudovirales	VOGdb markers	Methanobacteriota	Methanobacteria	Methanobacteriales	Methanobacteriaceae	Methanobrevibacter_A	Methanobrevibacter_A smithii	VC_357_6	No	NA	Not-determined	NA	0	UK	0.0189076	Yes
Xie_HL_2016_CS_36526.scaffold76281_2_34866	GUT_GENOME284814_21_16225	34866	Unassigned		Methanobacteriota	Methanobacteria	Methanobacteriales	Methanobacteriaceae	Methanobrevibacter_A	Methanobrevibacter_A smithii_A	Outlier	No	NA	Not-determined	NA	0	UK	0.0241597	No
Xie_HL_2016_CS_36533.scaffold109060_1_23156	ERR688624.NODE_1318_21	23156	Unassigned		Methanobacteriota	Methanobacteria	Methanobacteriales	Methanobacteriaceae	Methanobrevibacter_A	Methanobrevibacter_A smithii	Outlier	No	NA	Not-determined	NA	0	UK	0.0162815	No
Xie_HL_2016_CS_36533.scaffold109060_2_65612	ERR688624.NODE_1318_21	65612	Duplodnaviria;Heunggongvirae;Uroviricota;Caudoviricetes;Caudovirales;Myoviridae	VOGdb markers	Methanobacteriota	Methanobacteria	Methanobacteriales	Methanobacteriaceae	Methanobrevibacter_A	Methanobrevibacter_A smithii	VC_328_0	No	NA	Not-determined	NA	0	UK	0.00577731	No
Xie_HL_2016_CS_36533.scaffold109106_1_110727	GUT_GENOME261695_15_32706	110727	Duplodnaviria;Heunggongvirae;Uroviricota;Caudoviricetes;Caudovirales	VOGdb markers	Methanobacteriota	Methanobacteria	Methanobacteriales	Methanobacteriaceae	Methanobrevibacter_A	Methanobrevibacter_A smithii	VC_327_4	No	NA	Not-determined	NA	0	UK	0.0052521	No
Xie_HL_2016_CS_36533.scaffold109948_1_44050	GUT_GENOME194277_1_110295	44050	Unassigned		Methanobacteriota	Methanobacteria	Methanobacteriales	Methanobacteriaceae	Methanobrevibacter_A	Methanobrevibacter_A smithii	Outlier	No	NA	Not-determined	NA	0	UK	0.00577731	No
Xie_HL_2016_CS_36533.scaffold109948_3_39715	GUT_GENOME279910_4_62128	39715	Unassigned		Methanobacteriota	Methanobacteria	Methanobacteriales	Methanobacteriaceae	Methanobrevibacter_A	Methanobrevibacter_A smithii	Outlier	No	NA	Not-determined	NA	0	UK	0	No
Xie_HL_2016_CS_36533.scaffold110166_1_104099	GUT_GENOME011061_10_783	104099	Duplodnaviria;Heunggongvirae;Uroviricota;Caudoviricetes;Caudovirales	VOGdb markers	Methanobacteriota	Methanobacteria	Methanobacteriales	Methanobacteriaceae	Methanobrevibacter_A	Methanobrevibacter_A smithii	VC_329_5	No	NA	Not-determined	NA	0	UK	0.0304622	No
Xie_HL_2016_CS_36533.scaffold1950_1_209373	GUT_GENOME258086_2_60997	209373	Unassigned		Methanobacteriota	Methanobacteria	Methanobacteriales	Methanobacteriaceae	Methanobrevibacter_A	Methanobrevibacter_A smithii	VC_356_4	No	NA	Not-determined	NA	0	UK	0.00052521	No
Xie_HL_2016_CS_36533.scaffold54698_4_149968	GUT_GENOME194277_1_111100	149968	Unassigned		Methanobacteriota	Methanobacteria	Methanobacteriales	Methanobacteriaceae	Methanobrevibacter_A	Methanobrevibacter_A smithii	VC_331_11	No	NA	Not-determined	NA	0	UK	0	No
Xie_HL_2016_CS_36588.scaffold162_1_83715	GUT_GENOME066320_3_57785	83715	Duplodnaviria;Heunggongvirae;Uroviricota;Caudoviricetes;Caudovirales	VOGdb markers	Methanobacteriota	Methanobacteria	Methanobacteriales	Methanobacteriaceae	Methanobrevibacter_A	Methanobrevibacter_A smithii_A	VC_357_2	No	NA	Not-determined	NA	0	UK	0.0141807	Yes
Xie_HL_2016_CS_36588.scaffold162_2_2721	ERR688624.NODE_1318_21	2721	Unassigned		Methanobacteriota	Methanobacteria	Methanobacteriales	Methanobacteriaceae	Methanobrevibacter_A	Methanobrevibacter_A smithii_A	Singleton	No	NA	Not-determined	NA	0	UK	0.0267857	No
Xie_HL_2016_CS_36588.scaffold18274_2_70787	GUT_GENOME107745_54_7356	70787	Unassigned		Methanobacteriota	Methanobacteria	Methanobacteriales	Methanobacteriaceae	Methanobrevibacter_A	Methanobrevibacter_A smithii	VC_331_3	No	NA	Not-determined	NA	0	UK	0	No
Xie_HL_2016_CS_36588.scaffold24129_5_34569	GUT_GENOME262465_48_7516	34569	Unassigned		Methanobacteriota	Methanobacteria	Methanobacteriales	Methanobacteriaceae	Methanobrevibacter_A	Methanobrevibacter_A smithii	Outlier	No	NA	Not-determined	NA	0	UK	0.00210084	No
Xie_HL_2016_CS_36588.scaffold91503_1_86881	GUT_GENOME269219_18_19236	86881	Unassigned		Methanobacteriota	Methanobacteria	Methanobacteriales	Methanobacteriaceae	Methanobrevibacter_A	Methanobrevibacter_A smithii	Outlier	No	NA	Not-determined	NA	0	UK	0.00105042	No
Xie_HL_2016_CS_36588.scaffold91700_1_58705	GUT_GENOME118976_2_16387	58705	Unassigned		Methanobacteriota	Methanobacteria	Methanobacteriales	Methanobacteriaceae	Methanobrevibacter_A	Methanobrevibacter_A smithii	VC_332_1	No	NA	Not-determined	NA	0	UK	0.00052521	No
Xie_HL_2016_CS_36667.scaffold131288_1_1450	GUT_GENOME268740_5_138438	1450	Unassigned		Methanobacteriota	Methanobacteria	Methanobacteriales	Methanobacteriaceae	Methanobrevibacter_A	Methanobrevibacter_A smithii	Singleton	No	NA	Low-quality	3.18	0	UK	0.0194328	No
Xie_HL_2016_CS_36667.scaffold145621_1_7296	GUT_GENOME268814_20_603	7296	Unassigned		Methanobacteriota	Methanobacteria	Methanobacteriales	Methanobacteriaceae	Methanobrevibacter_A	Methanobrevibacter_A smithii	Overlap (VC_367/VC_373)	No	NA	Not-determined	NA	0	UK	0.00052521	No
Xie_HL_2016_CS_36695.scaffold22866_1_134501	GUT_GENOME143185_12_220085	134501	Unassigned		Methanobacteriota	Methanobacteria	Methanobacteriales	Methanobacteriaceae	Methanobrevibacter_A	Methanobrevibacter_A smithii_A	VC_334_0	No	NA	Medium-quality	85.87	0	UK	0.0131303	Yes
Xie_HL_2016_CS_36695.scaffold30255_1_219995	GUT_GENOME269219_18_19236	219995	Unassigned		Methanobacteriota	Methanobacteria	Methanobacteriales	Methanobacteriaceae	Methanobrevibacter_A	Methanobrevibacter_A smithii	VC_331_13	No	NA	Not-determined	NA	0	UK	0.00210084	No
Xie_HL_2016_CS_36695.scaffold43673_2_166333	GUT_GENOME261695_15_32706	166333	Duplodnaviria;Heunggongvirae;Uroviricota;Caudoviricetes;Caudovirales	VOGdb markers	Methanobacteriota	Methanobacteria	Methanobacteriales	Methanobacteriaceae	Methanobrevibacter_A	Methanobrevibacter_A smithii	VC_327_3	No	NA	High-quality	100	0	UK	0.0152311	No
Xie_HL_2016_CS_36699.scaffold113773_1_77000	GUT_GENOME279910_4_62128	77000	Unassigned		Methanobacteriota	Methanobacteria	Methanobacteriales	Methanobacteriaceae	Methanobrevibacter_A	Methanobrevibacter_A smithii	VC_332_1	No	NA	Not-determined	NA	0	UK	0.0246849	No
Xie_HL_2016_CS_36699.scaffold29016_1_83466	GUT_GENOME194277_1_111100	83466	Unassigned		Methanobacteriota	Methanobacteria	Methanobacteriales	Methanobacteriaceae	Methanobrevibacter_A	Methanobrevibacter_A smithii	Outlier	No	NA	Not-determined	NA	0	UK	0.0304622	No
Xie_HL_2016_CS_36699.scaffold36274_1_101888	GUT_GENOME282742_6_115569	101888	Unassigned		Methanobacteriota	Methanobacteria	Methanobacteriales	Methanobacteriaceae	Methanobrevibacter_A	Methanobrevibacter_A smithii	VC_334_0	No	NA	Not-determined	NA	0	UK	0.0267857	No
Xie_HL_2016_CS_36699.scaffold8506_2_83249	GUT_GENOME093215_4_44917	83249	Unassigned		Methanobacteriota	Methanobacteria	Methanobacteriales	Methanobacteriaceae	Methanobrevibacter_A	Methanobrevibacter_A smithii	Outlier	No	NA	Not-determined	NA	0	UK	0.00682773	No
Xie_HL_2016_CS_36699.scaffold98061_2_55987	GUT_GENOME259830_2_112204	55987	Unassigned		Methanobacteriota	Methanobacteria	Methanobacteriales	Methanobacteriaceae	Methanobrevibacter_A	Methanobrevibacter_A smithii	Outlier	No	NA	Not-determined	NA	0	UK	0.0052521	No
Xie_HL_2016_CS_36699.scaffold98812_2_67014	GUT_GENOME268434_7_1368	67014	Unassigned		Methanobacteriota	Methanobacteria	Methanobacteriales	Methanobacteriaceae	Methanobrevibacter_A	Methanobrevibacter_A smithii	VC_333_0	No	NA	Not-determined	NA	0	UK	0.0173319	No
Xie_HL_2016_CS_37097.scaffold23604_1_165111	GUT_GENOME143185_12_220085	165111	Unassigned		Methanobacteriota	Methanobacteria	Methanobacteriales	Methanobacteriaceae	Methanobrevibacter_A	Methanobrevibacter_A smithii_A	VC_334_1	No	NA	Not-determined	NA	0	UK	0.0357143	Yes
Xie_HL_2016_CS_37097.scaffold6951_2_131078	GUT_GENOME265514_19_8607	131078	Duplodnaviria;Heunggongvirae;Uroviricota;Caudoviricetes;Caudovirales	VOGdb markers	Methanobacteriota	Methanobacteria	Methanobacteriales	Methanobacteriaceae	Methanobrevibacter_A	Methanobrevibacter_A smithii	VC_329_6	No	NA	Not-determined	NA	0	UK	0.0120798	No
Xie_HL_2016_CS_37097.scaffold6951_5_40291	GUT_GENOME268740_5_139633	40291	Unassigned		Methanobacteriota	Methanobacteria	Methanobacteriales	Methanobacteriaceae	Methanobrevibacter_A	Methanobrevibacter_A smithii	Outlier	No	NA	Not-determined	NA	0	UK	0.00577731	No
Xie_HL_2016_CS_37097.scaffold90813_1_185793	GUT_GENOME194277_1_111100	185793	Unassigned		Methanobacteriota	Methanobacteria	Methanobacteriales	Methanobacteriaceae	Methanobrevibacter_A	Methanobrevibacter_A smithii	VC_331_13	No	NA	Not-determined	NA	0	UK	0.00105042	No
Xie_HL_2016_CS_37100.scaffold120473_3_35752	GUT_GENOME253955_2_249842	35752	Unassigned		Methanobacteriota	Methanobacteria	Methanobacteriales	Methanobacteriaceae	Methanobrevibacter_A	Methanobrevibacter_A smithii	Outlier	No	NA	Low-quality	19	0	UK	0.019958	No
Xie_HL_2016_CS_37100.scaffold53526_3_54961	GUT_GENOME065782_4_128877	54961	Unassigned		Methanobacteriota	Methanobacteria	Methanobacteriales	Methanobacteriaceae	Methanobrevibacter_A	Methanobrevibacter_A smithii	Outlier	No	NA	Not-determined	NA	0	UK	0	No
Xie_HL_2016_CS_37100.scaffold53526_4_89363	GUT_GENOME246782_8_59663	89363	Unassigned		Methanobacteriota	Methanobacteria	Methanobacteriales	Methanobacteriaceae	Methanobrevibacter_A	Methanobrevibacter_A smithii	Outlier	No	NA	Not-determined	NA	0	UK	0.0231092	No
Xie_HL_2016_CS_37101.scaffold100038_3_53700	GUT_GENOME253955_2_249842	53700	Duplodnaviria;Heunggongvirae;Uroviricota;Caudoviricetes;Caudovirales;Myoviridae	VOGdb markers	Methanobacteriota	Methanobacteria	Methanobacteriales	Methanobacteriaceae	Methanobrevibacter_A	Methanobrevibacter_A smithii	VC_328_0	No	NA	Low-quality	28.53	0	UK	0.00052521	No
Xie_HL_2016_CS_37101.scaffold13180_1_52865	GUT_GENOME259830_2_112204	52865	Duplodnaviria;Heunggongvirae;Uroviricota;Caudoviricetes;Caudovirales	VOGdb markers	Methanobacteriota	Methanobacteria	Methanobacteriales	Methanobacteriaceae	Methanobrevibacter_A	Methanobrevibacter_A smithii	VC_327_4	No	NA	Not-determined	NA	0	UK	0.0740546	No
Xie_HL_2016_CS_37101.scaffold13180_3_24378	GUT_GENOME259830_2_112204	24378	Unassigned		Methanobacteriota	Methanobacteria	Methanobacteriales	Methanobacteriaceae	Methanobrevibacter_A	Methanobrevibacter_A smithii	Outlier	No	NA	Not-determined	NA	0	UK	0.0304622	No
Xie_HL_2016_CS_37101.scaffold27711_3_93687	GUT_GENOME247693_325_79	93687	Unassigned		Methanobacteriota	Methanobacteria	Methanobacteriales	Methanobacteriaceae	Methanobrevibacter_A	Methanobrevibacter_A smithii	VC_331_3	No	NA	Not-determined	NA	0	UK	0.00157563	No
Xie_HL_2016_CS_37101.scaffold37656_1_67362	GUT_GENOME282742_6_115569	67362	Unassigned		Methanobacteriota	Methanobacteria	Methanobacteriales	Methanobacteriaceae	Methanobrevibacter_A	Methanobrevibacter_A smithii	Outlier	No	NA	Not-determined	NA	0	UK	0.0294118	No
Xie_HL_2016_CS_37101.scaffold48514_1_150616	GUT_GENOME247414_2_5385	150616	Duplodnaviria;Heunggongvirae;Uroviricota;Caudoviricetes;Caudovirales	VOGdb markers	Methanobacteriota	Methanobacteria	Methanobacteriales	Methanobacteriaceae	Methanobrevibacter_A	Methanobrevibacter_A smithii	VC_357_1	No	NA	Not-determined	NA	0	UK	0.0336134	Yes
Xie_HL_2016_CS_37101.scaffold85527_1_67258	GUT_GENOME279910_4_62128	67258	Unassigned		Methanobacteriota	Methanobacteria	Methanobacteriales	Methanobacteriaceae	Methanobrevibacter_A	Methanobrevibacter_A smithii	VC_332_1	No	NA	Not-determined	NA	0	UK	0.0441176	No
Xie_HL_2016_CS_37101.scaffold9388_1_123701	GUT_GENOME258086_2_60997	123701	Unassigned		Methanobacteriota	Methanobacteria	Methanobacteriales	Methanobacteriaceae	Methanobrevibacter_A	Methanobrevibacter_A smithii	VC_356_2	No	NA	Not-determined	NA	0	UK	0	No
Xie_HL_2016_CS_37101.scaffold9388_3_78737	GUT_GENOME093215_4_44917	78737	Unassigned		Methanobacteriota	Methanobacteria	Methanobacteriales	Methanobacteriaceae	Methanobrevibacter_A	Methanobrevibacter_A smithii	Outlier	No	NA	Not-determined	NA	0	UK	0.00315126	No
Xie_HL_2016_CS_37105.scaffold734_2_77457	GUT_GENOME018608_1_36299	77457	Unassigned		Methanobacteriota	Methanobacteria	Methanobacteriales	Methanobacteriaceae	Methanobrevibacter_A	Methanobrevibacter_A smithii	VC_331_3	No	NA	Not-determined	NA	0	UK	0.00210084	No
Xie_HL_2016_CS_37105.scaffold734_3_1226	GUT_GENOME018608_1_36299	1226	Unassigned		Methanobacteriota	Methanobacteria	Methanobacteriales	Methanobacteriaceae	Methanobrevibacter_A	Methanobrevibacter_A smithii	Singleton	No	NA	Not-determined	NA	0	UK	0.0183824	Yes
Xie_HL_2016_CS_37105.scaffold91669_1_66375	GUT_GENOME269219_18_19236	66375	Unassigned		Methanobacteriota	Methanobacteria	Methanobacteriales	Methanobacteriaceae	Methanobrevibacter_A	Methanobrevibacter_A smithii	Outlier	No	NA	Not-determined	NA	0	UK	0.0267857	No
Xie_HL_2016_CS_37137.scaffold22892_5_62762	GUT_GENOME023085_4_168671	62762	Unassigned		Methanobacteriota	Methanobacteria	Methanobacteriales	Methanobacteriaceae	Methanobrevibacter_A	Methanobrevibacter_A smithii	VC_332_1	No	NA	Not-determined	NA	0	UK	0.0357143	No
Xie_HL_2016_CS_37137.scaffold60619_1_329016	GUT_GENOME258086_2_60997	329016	Unassigned		Methanobacteriota	Methanobacteria	Methanobacteriales	Methanobacteriaceae	Methanobrevibacter_A	Methanobrevibacter_A smithii	VC_356_1	No	NA	Not-determined	NA	0	UK	0.00052521	No
Xie_HL_2016_CS_37137.scaffold72457_2_128350	GUT_GENOME247693_325_79	128350	Unassigned		Methanobacteriota	Methanobacteria	Methanobacteriales	Methanobacteriaceae	Methanobrevibacter_A	Methanobrevibacter_A smithii	VC_331_3	No	NA	Not-determined	NA	0	UK	0.0241597	No
Xie_HL_2016_CS_37137.scaffold90340_1_92340	GUT_GENOME253955_2_249842	92340	Duplodnaviria;Heunggongvirae;Uroviricota;Caudoviricetes;Caudovirales;Myoviridae	VOGdb markers	Methanobacteriota	Methanobacteria	Methanobacteriales	Methanobacteriaceae	Methanobrevibacter_A	Methanobrevibacter_A smithii	VC_328_0	No	NA	Medium-quality	74.27	0	UK	0	No
Xie_HL_2016_CS_37137.scaffold95383_1_73318	SRR9655013.NODE_1263_8534	73318	Unassigned		Methanobacteriota	Methanobacteria	Methanobacteriales	Methanobacteriaceae	Methanobrevibacter_A	Methanobrevibacter_A smithii_A	Outlier	No	NA	Not-determined	NA	0	UK	0.00210084	No
Xie_HL_2016_CS_37137.scaffold95383_2_58358	SRR9655013.NODE_1263_8534	58358	Duplodnaviria;Heunggongvirae;Uroviricota;Caudoviricetes;Caudovirales	VOGdb markers	Methanobacteriota	Methanobacteria	Methanobacteriales	Methanobacteriaceae	Methanobrevibacter_A	Methanobrevibacter_A smithii_A	VC_327_4	No	NA	Not-determined	NA	0	UK	0.00052521	No
Xie_HL_2016_CS_37137.scaffold95383_4_73480	SRR9655013.NODE_1263_8534	73480	Unassigned		Methanobacteriota	Methanobacteria	Methanobacteriales	Methanobacteriaceae	Methanobrevibacter_A	Methanobrevibacter_A smithii_A	Outlier	No	NA	Not-determined	NA	0	UK	0.0210084	No
Xie_HL_2016_CS_37138.scaffold103507_1_137561	GUT_GENOME143185_12_220085	137561	Unassigned		Methanobacteriota	Methanobacteria	Methanobacteriales	Methanobacteriaceae	Methanobrevibacter_A	Methanobrevibacter_A smithii_A	VC_334_0	No	NA	Medium-quality	73.09	0	UK	0.00052521	Yes
Xie_HL_2016_CS_37138.scaffold106192_1_137780	GUT_GENOME261695_15_32826	137780	Duplodnaviria;Heunggongvirae;Uroviricota;Caudoviricetes;Caudovirales	VOGdb markers	Methanobacteriota	Methanobacteria	Methanobacteriales	Methanobacteriaceae	Methanobrevibacter_A	Methanobrevibacter_A smithii	VC_327_2	No	NA	Not-determined	NA	0	UK	0.0246849	No
Xie_HL_2016_CS_37138.scaffold106289_1_46778	GUT_GENOME018608_1_39351	46778	Unassigned		Methanobacteriota	Methanobacteria	Methanobacteriales	Methanobacteriaceae	Methanobrevibacter_A	Methanobrevibacter_A smithii	Outlier	No	NA	Not-determined	NA	0	UK	0.0267857	No
Xie_HL_2016_CS_37138.scaffold106986_1_82011	ERR688624.NODE_1318_21	82011	Duplodnaviria;Heunggongvirae;Uroviricota;Caudoviricetes;Caudovirales;Myoviridae	VOGdb markers	Methanobacteriota	Methanobacteria	Methanobacteriales	Methanobacteriaceae	Methanobrevibacter_A	Methanobrevibacter_A smithii	VC_328_0	No	NA	Not-determined	NA	0	UK	0.00997899	No
Xie_HL_2016_CS_37138.scaffold109187_1_42849	GUT_GENOME273866_45_728	42849	Unassigned		Methanobacteriota	Methanobacteria	Methanobacteriales	Methanobacteriaceae	Methanobrevibacter_A	Methanobrevibacter_A smithii	Outlier	No	NA	High-quality	100	0	UK	0.0183824	Yes
Xie_HL_2016_CS_37138.scaffold13514_1_113010	GUT_GENOME143185_16_1306	113010	Duplodnaviria;Heunggongvirae;Uroviricota;Caudoviricetes;Caudovirales	VOGdb markers	Methanobacteriota	Methanobacteria	Methanobacteriales	Methanobacteriaceae	Methanobrevibacter_A	Methanobrevibacter_A smithii_A	VC_329_5	No	NA	Not-determined	NA	0	UK	0.0194328	No
Xie_HL_2016_CS_37138.scaffold25762_1_188090	GUT_GENOME247693_325_79	188090	Unassigned		Methanobacteriota	Methanobacteria	Methanobacteriales	Methanobacteriaceae	Methanobrevibacter_A	Methanobrevibacter_A smithii	VC_331_13	No	NA	Not-determined	NA	0	UK	0.00472689	No
Xie_HL_2016_CS_37138.scaffold35549_2_218381	GUT_GENOME258086_2_60997	218381	Unassigned		Methanobacteriota	Methanobacteria	Methanobacteriales	Methanobacteriaceae	Methanobrevibacter_A	Methanobrevibacter_A smithii	VC_356_4	No	NA	Not-determined	NA	0	UK	0.00052521	No
Xie_HL_2016_CS_37138.scaffold74598_1_42200	GUT_GENOME259830_2_112204	42200	Unassigned		Methanobacteriota	Methanobacteria	Methanobacteriales	Methanobacteriaceae	Methanobrevibacter_A	Methanobrevibacter_A smithii	Outlier	No	NA	Not-determined	NA	0	UK	0.022584	No
Xie_HL_2016_CS_37138.scaffold74598_2_47446	SRR9655013.NODE_1263_8534	47446	Unassigned		Methanobacteriota	Methanobacteria	Methanobacteriales	Methanobacteriaceae	Methanobrevibacter_A	Methanobrevibacter_A smithii_A	Outlier	No	NA	Not-determined	NA	0	UK	0.00577731	No
Xie_HL_2016_CS_37171.scaffold43152_4_2670	GUT_GENOME273866_45_728	2670	Unassigned		Methanobacteriota	Methanobacteria	Methanobacteriales	Methanobacteriaceae	Methanobrevibacter_A	Methanobrevibacter_A smithii	VC_365_0	No	NA	Low-quality	6.95	0	UK	0	Yes
Xie_HL_2016_CS_37181.scaffold24829_2_101963	GUT_GENOME018608_1_39351	101963	Unassigned		Methanobacteriota	Methanobacteria	Methanobacteriales	Methanobacteriaceae	Methanobrevibacter_A	Methanobrevibacter_A smithii	Outlier	No	NA	Not-determined	NA	0	UK	0.00105042	No
Xie_HL_2016_CS_37181.scaffold24843_1_218124	GUT_GENOME246782_8_59663	218124	Unassigned		Methanobacteriota	Methanobacteria	Methanobacteriales	Methanobacteriaceae	Methanobrevibacter_A	Methanobrevibacter_A smithii	VC_331_13	No	NA	Not-determined	NA	0	UK	0.0194328	No
Xie_HL_2016_CS_37181.scaffold30954_1_139126	GUT_GENOME258086_2_60997	139126	Unassigned		Methanobacteriota	Methanobacteria	Methanobacteriales	Methanobacteriaceae	Methanobrevibacter_A	Methanobrevibacter_A smithii	VC_356_2	No	NA	Not-determined	NA	0	UK	0.0315126	No
Xie_HL_2016_CS_37181.scaffold30954_2_78694	GUT_GENOME093215_4_44917	78694	Unassigned		Methanobacteriota	Methanobacteria	Methanobacteriales	Methanobacteriaceae	Methanobrevibacter_A	Methanobrevibacter_A smithii	Outlier	No	NA	Not-determined	NA	0	UK	0.0152311	No
Xie_HL_2016_CS_37181.scaffold6128_1_165062	GUT_GENOME143185_16_1306	165062	Duplodnaviria;Heunggongvirae;Uroviricota;Caudoviricetes;Caudovirales	VOGdb markers	Methanobacteriota	Methanobacteria	Methanobacteriales	Methanobacteriaceae	Methanobrevibacter_A	Methanobrevibacter_A smithii_A	VC_329_5	No	NA	Not-determined	NA	0	UK	0.00997899	No
Xie_HL_2016_CS_37182.scaffold3168_3_76993	GUT_GENOME251364_2_123712	76993	Unassigned		Methanobacteriota	Methanobacteria	Methanobacteriales	Methanobacteriaceae	Methanobrevibacter_A	Methanobrevibacter_A smithii_A	VC_331_3	No	NA	Not-determined	NA	0	UK	0.0241597	No
Xie_HL_2016_CS_37182.scaffold33247_1_143276	GUT_GENOME247414_2_5385	143276	Duplodnaviria;Heunggongvirae;Uroviricota;Caudoviricetes;Caudovirales	VOGdb markers	Methanobacteriota	Methanobacteria	Methanobacteriales	Methanobacteriaceae	Methanobrevibacter_A	Methanobrevibacter_A smithii	VC_357_1	No	NA	Not-determined	NA	0	UK	0.0178571	Yes
Xie_HL_2016_CS_37182.scaffold59411_1_65718	GUT_GENOME282742_6_115569	65718	Unassigned		Methanobacteriota	Methanobacteria	Methanobacteriales	Methanobacteriaceae	Methanobrevibacter_A	Methanobrevibacter_A smithii	Outlier	No	NA	Low-quality	39.15	0	UK	0.00105042	Yes
Xie_HL_2016_CS_37182.scaffold62_1_53379	GUT_GENOME283326_2_367048	53379	Unassigned		Methanobacteriota	Methanobacteria	Methanobacteriales	Methanobacteriaceae	Methanobrevibacter_A	Methanobrevibacter_A smithii	Outlier	No	NA	Not-determined	NA	0	UK	0.0383403	No
Xie_HL_2016_CS_37192.scaffold119641_1_54187	ERR688624.NODE_1318_21	54187	Unassigned		Methanobacteriota	Methanobacteria	Methanobacteriales	Methanobacteriaceae	Methanobrevibacter_A	Methanobrevibacter_A smithii	Outlier	No	NA	Not-determined	NA	0	UK	0.00472689	No
Xie_HL_2016_CS_37192.scaffold119884_1_7559	GUT_GENOME021873_9_43855	7559	Unassigned		Methanobacteriota	Methanobacteria	Methanobacteriales	Methanobacteriaceae	Methanobrevibacter_A	Methanobrevibacter_A smithii	Outlier	No	NA	Not-determined	NA	0	UK	0	No
Xie_HL_2016_CS_37192.scaffold35082_1_41822	GUT_GENOME247693_325_79	41822	Unassigned		Methanobacteriota	Methanobacteria	Methanobacteriales	Methanobacteriaceae	Methanobrevibacter_A	Methanobrevibacter_A smithii	Outlier	No	NA	Not-determined	NA	0	UK	0.0246849	No
Xie_HL_2016_CS_37192.scaffold55802_2_104754	GUT_GENOME273630_6_80982	104754	Unassigned		Methanobacteriota	Methanobacteria	Methanobacteriales	Methanobacteriaceae	Methanobrevibacter_A	Methanobrevibacter_A smithii	VC_333_0	No	NA	Not-determined	NA	0	UK	0.00210084	No
Xie_HL_2016_CS_37192.scaffold77293_1_182581	GUT_GENOME194277_1_111100	182581	Unassigned		Methanobacteriota	Methanobacteria	Methanobacteriales	Methanobacteriaceae	Methanobrevibacter_A	Methanobrevibacter_A smithii	VC_331_13	No	NA	Not-determined	NA	0	UK	0.0309874	No
Xie_HL_2016_CS_37197.scaffold8672_4_1973	GUT_GENOME175261_1_144531	1973	Unassigned		Methanobacteriota	Methanobacteria	Methanobacteriales	Methanobacteriaceae	Methanobrevibacter_A	Methanobrevibacter_A smithii	Singleton	No	NA	Low-quality	4.85	0	UK	0.0136555	No
Xie_HL_2016_CS_37198.scaffold85275_3_23555	GUT_GENOME143185_16_1306	23555	Unassigned		Methanobacteriota	Methanobacteria	Methanobacteriales	Methanobacteriaceae	Methanobrevibacter_A	Methanobrevibacter_A smithii_A	VC_360_0	No	NA	Not-determined	NA	0	UK	0.0278361	No
Xie_HL_2016_CS_37201.scaffold24511_1_212110	GUT_GENOME247414_2_5385	212110	Duplodnaviria;Heunggongvirae;Uroviricota;Caudoviricetes;Caudovirales	VOGdb markers	Methanobacteriota	Methanobacteria	Methanobacteriales	Methanobacteriaceae	Methanobrevibacter_A	Methanobrevibacter_A smithii	VC_357_6	No	NA	Not-determined	NA	0	UK	0.0309874	Yes
Xie_HL_2016_CS_37201.scaffold40867_1_96399	GUT_GENOME247693_325_79	96399	Unassigned		Methanobacteriota	Methanobacteria	Methanobacteriales	Methanobacteriaceae	Methanobrevibacter_A	Methanobrevibacter_A smithii	VC_331_3	No	NA	Not-determined	NA	0	UK	0.0210084	No
Xie_HL_2016_CS_37201.scaffold73742_2_67658	GUT_GENOME279910_4_62128	67658	Unassigned		Methanobacteriota	Methanobacteria	Methanobacteriales	Methanobacteriaceae	Methanobrevibacter_A	Methanobrevibacter_A smithii	VC_332_1	No	NA	Not-determined	NA	0	UK	0.0131303	No
Xie_HL_2016_CS_37201.scaffold75624_1_56440	GUT_GENOME018608_1_39351	56440	Unassigned		Methanobacteriota	Methanobacteria	Methanobacteriales	Methanobacteriaceae	Methanobrevibacter_A	Methanobrevibacter_A smithii	Outlier	No	NA	Not-determined	NA	0	UK	0.0462185	No
Xie_HL_2016_CS_37203.scaffold38587_1_30745	GUT_GENOME246782_8_59663	30745	Unassigned		Methanobacteriota	Methanobacteria	Methanobacteriales	Methanobacteriaceae	Methanobrevibacter_A	Methanobrevibacter_A smithii	Outlier	No	NA	Not-determined	NA	0	UK	0.00735294	No
Xie_HL_2016_CS_37203.scaffold38587_2_31865	GUT_GENOME246782_8_59663	31865	Unassigned		Methanobacteriota	Methanobacteria	Methanobacteriales	Methanobacteriaceae	Methanobrevibacter_A	Methanobrevibacter_A smithii	Outlier	No	NA	Not-determined	NA	0	UK	0.00105042	No
Xie_HL_2016_CS_37203.scaffold61936_1_2556	GUT_GENOME118976_2_16387	2556	Unassigned		Methanobacteriota	Methanobacteria	Methanobacteriales	Methanobacteriaceae	Methanobrevibacter_A	Methanobrevibacter_A smithii	Singleton	No	NA	Not-determined	NA	0	UK	0.00052521	No
Xie_HL_2016_CS_37203.scaffold61936_7_71696	GUT_GENOME279910_4_62128	71696	Unassigned		Methanobacteriota	Methanobacteria	Methanobacteriales	Methanobacteriaceae	Methanobrevibacter_A	Methanobrevibacter_A smithii	VC_332_1	No	NA	Not-determined	NA	0	UK	0.00210084	No
Xie_HL_2016_CS_37208.scaffold118595_1_73168	GUT_GENOME253955_2_249842	73168	Duplodnaviria;Heunggongvirae;Uroviricota;Caudoviricetes;Caudovirales;Myoviridae	VOGdb markers	Methanobacteriota	Methanobacteria	Methanobacteriales	Methanobacteriaceae	Methanobrevibacter_A	Methanobrevibacter_A smithii	VC_328_0	No	NA	Not-determined	NA	0	UK	0.00262605	No
Xie_HL_2016_CS_37208.scaffold12939_4_191993	GUT_GENOME246782_8_59663	191993	Unassigned		Methanobacteriota	Methanobacteria	Methanobacteriales	Methanobacteriaceae	Methanobrevibacter_A	Methanobrevibacter_A smithii	VC_331_13	No	NA	Not-determined	NA	0	UK	0.0183824	No
Xie_HL_2016_CS_37208.scaffold22632_2_90103	GUT_GENOME268434_7_1368	90103	Unassigned		Methanobacteriota	Methanobacteria	Methanobacteriales	Methanobacteriaceae	Methanobrevibacter_A	Methanobrevibacter_A smithii	VC_333_0	No	NA	Not-determined	NA	0	UK	0.0168067	No
Xie_HL_2016_CS_37208.scaffold34629_5_59825	ERR688624.NODE_1318_21	59825	Unassigned		Methanobacteriota	Methanobacteria	Methanobacteriales	Methanobacteriaceae	Methanobrevibacter_A	Methanobrevibacter_A smithii	Outlier	No	NA	Not-determined	NA	0	UK	0	No
Xie_HL_2016_CS_37209.scaffold14251_2_152442	GUT_GENOME018608_1_36299	152442	Unassigned		Methanobacteriota	Methanobacteria	Methanobacteriales	Methanobacteriaceae	Methanobrevibacter_A	Methanobrevibacter_A smithii	VC_331_3	No	NA	Not-determined	NA	0	UK	0.00735294	No
Xie_HL_2016_CS_37209.scaffold20939_1_54182	GUT_GENOME262465_48_5353	54182	Unassigned		Methanobacteriota	Methanobacteria	Methanobacteriales	Methanobacteriaceae	Methanobrevibacter_A	Methanobrevibacter_A smithii	Outlier	No	NA	Not-determined	NA	0	UK	0.00052521	No
Xie_HL_2016_CS_37209.scaffold20939_2_46776	GUT_GENOME262465_48_5353	46776	Unassigned		Methanobacteriota	Methanobacteria	Methanobacteriales	Methanobacteriaceae	Methanobrevibacter_A	Methanobrevibacter_A smithii	Outlier	No	NA	Not-determined	NA	0	UK	0.00105042	No
Xie_HL_2016_CS_37209.scaffold341_1_86230	GUT_GENOME269219_18_19236	86230	Unassigned		Methanobacteriota	Methanobacteria	Methanobacteriales	Methanobacteriaceae	Methanobrevibacter_A	Methanobrevibacter_A smithii	Outlier	No	NA	Not-determined	NA	0	UK	0.019958	No
Xie_HL_2016_CS_37210.scaffold11649_1_111096	GUT_GENOME093215_4_44917	111096	Unassigned		Methanobacteriota	Methanobacteria	Methanobacteriales	Methanobacteriaceae	Methanobrevibacter_A	Methanobrevibacter_A smithii	VC_356_0	No	NA	Not-determined	NA	0	UK	0.0404412	No
Xie_HL_2016_CS_37210.scaffold143_2_41690	GUT_GENOME247693_325_79	41690	Unassigned		Methanobacteriota	Methanobacteria	Methanobacteriales	Methanobacteriaceae	Methanobrevibacter_A	Methanobrevibacter_A smithii	Outlier	No	NA	Not-determined	NA	0	UK	0.0210084	No
Xie_HL_2016_CS_37210.scaffold143_3_88178	GUT_GENOME247693_325_79	88178	Unassigned		Methanobacteriota	Methanobacteria	Methanobacteriales	Methanobacteriaceae	Methanobrevibacter_A	Methanobrevibacter_A smithii	VC_331_12	No	NA	Not-determined	NA	0	UK	0.0210084	No
Xie_HL_2016_CS_37210.scaffold598_2_132691	GUT_GENOME143185_12_220085	132691	Unassigned		Methanobacteriota	Methanobacteria	Methanobacteriales	Methanobacteriaceae	Methanobrevibacter_A	Methanobrevibacter_A smithii_A	VC_334_0	No	NA	High-quality	100	0	UK	0.0273109	Yes
Xie_HL_2016_CS_37210.scaffold7451_2_170732	GUT_GENOME143185_16_1306	170732	Duplodnaviria;Heunggongvirae;Uroviricota;Caudoviricetes;Caudovirales	VOGdb markers	Methanobacteriota	Methanobacteria	Methanobacteriales	Methanobacteriaceae	Methanobrevibacter_A	Methanobrevibacter_A smithii_A	VC_329_9	No	NA	Not-determined	NA	0	UK	0.0840336	No
Xie_HL_2016_CS_37223.scaffold40693_1_4786	GUT_GENOME021873_9_43855	4786	Unassigned		Methanobacteriota	Methanobacteria	Methanobacteriales	Methanobacteriaceae	Methanobrevibacter_A	Methanobrevibacter_A smithii	Outlier	No	NA	Not-determined	NA	0	UK	0.0262605	No
Xie_HL_2016_CS_37229.scaffold20520_3_179446	GUT_GENOME284192_60_6919	179446	Duplodnaviria;Heunggongvirae;Uroviricota;Caudoviricetes;Caudovirales	VOGdb markers	Methanobacteriota	Methanobacteria	Methanobacteriales	Methanobacteriaceae	Methanobrevibacter_A	Methanobrevibacter_A smithii	VC_329_7	No	NA	Not-determined	NA	0	UK	0.0141807	No
Xie_HL_2016_CS_37229.scaffold21190_1_30599	GUT_GENOME018608_1_39351	30599	Unassigned		Methanobacteriota	Methanobacteria	Methanobacteriales	Methanobacteriaceae	Methanobrevibacter_A	Methanobrevibacter_A smithii	VC_360_0	No	NA	Not-determined	NA	0	UK	0.0283613	No
Xie_HL_2016_CS_37229.scaffold31882_1_121446	GUT_GENOME253955_2_249842	121446	Duplodnaviria;Heunggongvirae;Uroviricota;Caudoviricetes;Caudovirales;Myoviridae	VOGdb markers	Methanobacteriota	Methanobacteria	Methanobacteriales	Methanobacteriaceae	Methanobrevibacter_A	Methanobrevibacter_A smithii	VC_328_0	No	NA	Not-determined	NA	0	UK	0.0309874	No
Xie_HL_2016_CS_37229.scaffold34493_1_107627	GUT_GENOME268434_7_1368	107627	Unassigned		Methanobacteriota	Methanobacteria	Methanobacteriales	Methanobacteriaceae	Methanobrevibacter_A	Methanobrevibacter_A smithii	VC_333_0	No	NA	Not-determined	NA	0	UK	0.0246849	No
Xie_HL_2016_CS_37229.scaffold6536_1_60586	GUT_GENOME118976_2_16387	60586	Unassigned		Methanobacteriota	Methanobacteria	Methanobacteriales	Methanobacteriaceae	Methanobrevibacter_A	Methanobrevibacter_A smithii	VC_332_1	No	NA	Not-determined	NA	0	UK	0.00105042	No
Xie_HL_2016_CS_37229.scaffold7486_1_164719	GUT_GENOME269219_18_19236	164719	Unassigned		Methanobacteriota	Methanobacteria	Methanobacteriales	Methanobacteriaceae	Methanobrevibacter_A	Methanobrevibacter_A smithii	VC_331_13	No	NA	Not-determined	NA	0	UK	0.0283613	No
Xie_HL_2016_CS_37232.scaffold15633_10_29995	GUT_GENOME284814_21_16225	29995	Unassigned		Methanobacteriota	Methanobacteria	Methanobacteriales	Methanobacteriaceae	Methanobrevibacter_A	Methanobrevibacter_A smithii_A	Outlier	No	NA	Not-determined	NA	0	UK	0	No
Xie_HL_2016_CS_37232.scaffold42431_8_24356	GUT_GENOME284192_60_6919	24356	Unassigned		Methanobacteriota	Methanobacteria	Methanobacteriales	Methanobacteriaceae	Methanobrevibacter_A	Methanobrevibacter_A smithii_A	VC_360_0	No	NA	Not-determined	NA	0	UK	0.00210084	No
Xie_HL_2016_CS_37233.scaffold10383_3_210365	GUT_GENOME250989_1_407944	210365	Duplodnaviria;Heunggongvirae;Uroviricota;Caudoviricetes;Caudovirales	VOGdb markers	Methanobacteriota	Methanobacteria	Methanobacteriales	Methanobacteriaceae	Methanobrevibacter_A	Methanobrevibacter_A smithii	VC_357_0	No	NA	Not-determined	NA	0	UK	0.00105042	Yes
Xie_HL_2016_CS_37233.scaffold11173_3_152793	GUT_GENOME258086_2_60997	152793	Unassigned		Methanobacteriota	Methanobacteria	Methanobacteriales	Methanobacteriaceae	Methanobrevibacter_A	Methanobrevibacter_A smithii	VC_356_2	No	NA	Not-determined	NA	0	UK	0.00262605	No
Xie_HL_2016_CS_37233.scaffold11173_4_35709	GUT_GENOME268434_7_1368	35709	Unassigned		Methanobacteriota	Methanobacteria	Methanobacteriales	Methanobacteriaceae	Methanobrevibacter_A	Methanobrevibacter_A smithii	Outlier	No	NA	Not-determined	NA	0	UK	0.0262605	No
Xie_HL_2016_CS_37233.scaffold127772_1_63010	GUT_GENOME282742_6_115569	63010	Unassigned		Methanobacteriota	Methanobacteria	Methanobacteriales	Methanobacteriaceae	Methanobrevibacter_A	Methanobrevibacter_A smithii	Outlier	No	NA	Not-determined	NA	0	UK	0.0115546	No
Xie_HL_2016_CS_37233.scaffold9141_1_3394	GUT_GENOME259830_2_112204	3394	Unassigned		Methanobacteriota	Methanobacteria	Methanobacteriales	Methanobacteriaceae	Methanobrevibacter_A	Methanobrevibacter_A smithii	Outlier	No	NA	Not-determined	NA	0	UK	0.0241597	No
Xie_HL_2016_CS_37233.scaffold9141_5_53720	GUT_GENOME259830_2_112204	53720	Unassigned		Methanobacteriota	Methanobacteria	Methanobacteriales	Methanobacteriaceae	Methanobrevibacter_A	Methanobrevibacter_A smithii	Outlier	No	NA	Not-determined	NA	0	UK	0.0168067	No
Xie_HL_2016_CS_37233.scaffold9141_6_19619	GUT_GENOME259830_2_112204	19619	Unassigned		Methanobacteriota	Methanobacteria	Methanobacteriales	Methanobacteriaceae	Methanobrevibacter_A	Methanobrevibacter_A smithii	Outlier	No	NA	Not-determined	NA	0	UK	0.0152311	No
Xie_HL_2016_CS_37254.scaffold24120_1_80044	GUT_GENOME066320_3_58150	80044	Unassigned		Methanobacteriota	Methanobacteria	Methanobacteriales	Methanobacteriaceae	Methanobrevibacter_A	Methanobrevibacter_A smithii_A	Outlier	No	NA	Not-determined	NA	0	UK	0.0120798	No
Xie_HL_2016_CS_37254.scaffold75774_1_105723	GUT_GENOME284814_21_16225	105723	Unassigned		Methanobacteriota	Methanobacteria	Methanobacteriales	Methanobacteriaceae	Methanobrevibacter_A	Methanobrevibacter_A smithii_A	VC_333_0	No	NA	Not-determined	NA	0	UK	0.00997899	No
Xie_HL_2016_CS_37254.scaffold90196_2_84594	GUT_GENOME279910_4_62128	84594	Unassigned		Methanobacteriota	Methanobacteria	Methanobacteriales	Methanobacteriaceae	Methanobrevibacter_A	Methanobrevibacter_A smithii	VC_332_1	No	NA	Not-determined	NA	0	UK	0.0388655	No
Xie_HL_2016_CS_37264.scaffold21787_1_11742	GUT_GENOME066320_3_58150	11742	Unassigned		Methanobacteriota	Methanobacteria	Methanobacteriales	Methanobacteriaceae	Methanobrevibacter_A	Methanobrevibacter_A smithii_A	Outlier	No	NA	Low-quality	7.94	0	UK	0.0178571	No
Xie_HL_2016_CS_37264.scaffold21787_10_9385	GUT_GENOME066320_3_58150	9385	Unassigned		Methanobacteriota	Methanobacteria	Methanobacteriales	Methanobacteriaceae	Methanobrevibacter_A	Methanobrevibacter_A smithii_A	Outlier	No	NA	Not-determined	NA	0	UK	0.0493697	No
Xie_HL_2016_CS_37264.scaffold21787_2_35224	GUT_GENOME066320_3_58150	35224	Unassigned		Methanobacteriota	Methanobacteria	Methanobacteriales	Methanobacteriaceae	Methanobrevibacter_A	Methanobrevibacter_A smithii_A	Outlier	No	NA	Not-determined	NA	0	UK	0.0236345	No
Xie_HL_2016_CS_37264.scaffold21787_3_58979	GUT_GENOME066320_3_58150	58979	Duplodnaviria;Heunggongvirae;Uroviricota;Caudoviricetes;Caudovirales	VOGdb markers	Methanobacteriota	Methanobacteria	Methanobacteriales	Methanobacteriaceae	Methanobrevibacter_A	Methanobrevibacter_A smithii_A	VC_327_4	No	NA	Not-determined	NA	0	UK	0.0168067	No
Xie_HL_2016_CS_37264.scaffold21787_4_77174	GUT_GENOME066320_3_58150	77174	Unassigned		Methanobacteriota	Methanobacteria	Methanobacteriales	Methanobacteriaceae	Methanobrevibacter_A	Methanobrevibacter_A smithii_A	Outlier	No	NA	Not-determined	NA	0	UK	0.0194328	No
Xie_HL_2016_CS_37264.scaffold84040_2_104073	GUT_GENOME020562_14_876	104073	Unassigned		Methanobacteriota	Methanobacteria	Methanobacteriales	Methanobacteriaceae	Methanobrevibacter_A	Methanobrevibacter_A smithii_A	VC_334_1	No	NA	Not-determined	NA	0	UK	0.0246849	Yes
Xie_HL_2016_CS_37269.scaffold14453_2_21406	GUT_GENOME060185_13_536	21406	Unassigned		Methanobacteriota	Methanobacteria	Methanobacteriales	Methanobacteriaceae	Methanobrevibacter_A	Methanobrevibacter_A smithii	Outlier	No	NA	Not-determined	NA	0	UK	0.00105042	No
Xie_HL_2016_CS_37269.scaffold26358_3_10067	GUT_GENOME143185_16_1306	10067	Unassigned		Methanobacteriota	Methanobacteria	Methanobacteriales	Methanobacteriaceae	Methanobrevibacter_A	Methanobrevibacter_A smithii_A	VC_369_0	No	NA	Not-determined	NA	0	UK	0.464286	No
Xie_HL_2016_CS_37287.scaffold101411_1_105276	GUT_GENOME284814_21_16225	105276	Unassigned		Methanobacteriota	Methanobacteria	Methanobacteriales	Methanobacteriaceae	Methanobrevibacter_A	Methanobrevibacter_A smithii_A	VC_333_0	No	NA	Not-determined	NA	0	UK	0.0115546	No
Xie_HL_2016_CS_37287.scaffold197_1_28015	GUT_GENOME284634_22_10926	28015	Unassigned		Methanobacteriota	Methanobacteria	Methanobacteriales	Methanobacteriaceae	Methanobrevibacter_A	Methanobrevibacter_A smithii	Outlier	No	NA	Not-determined	NA	0	UK	0.00210084	No
Xie_HL_2016_CS_37287.scaffold197_3_105328	GUT_GENOME284634_22_10926	105328	Duplodnaviria;Heunggongvirae;Uroviricota;Caudoviricetes;Caudovirales	VOGdb markers	Methanobacteriota	Methanobacteria	Methanobacteriales	Methanobacteriaceae	Methanobrevibacter_A	Methanobrevibacter_A smithii	VC_357_4	No	NA	Not-determined	NA	0	UK	0.0357143	Yes
Xie_HL_2016_CS_37287.scaffold27624_1_65757	GUT_GENOME066320_3_58150	65757	Unassigned		Methanobacteriota	Methanobacteria	Methanobacteriales	Methanobacteriaceae	Methanobrevibacter_A	Methanobrevibacter_A smithii_A	Outlier	No	NA	Not-determined	NA	0	UK	0.019958	No
Xie_HL_2016_CS_37287.scaffold66615_1_140120	GUT_GENOME011061_10_783	140120	Duplodnaviria;Heunggongvirae;Uroviricota;Caudoviricetes;Caudovirales	VOGdb markers	Methanobacteriota	Methanobacteria	Methanobacteriales	Methanobacteriaceae	Methanobrevibacter_A	Methanobrevibacter_A smithii	VC_329_5	No	NA	Medium-quality	88.32	0	UK	0.0178571	Yes
Xie_HL_2016_CS_37287.scaffold97048_1_112082	GUT_GENOME020562_14_876	112082	Unassigned		Methanobacteriota	Methanobacteria	Methanobacteriales	Methanobacteriaceae	Methanobrevibacter_A	Methanobrevibacter_A smithii_A	VC_334_1	No	NA	Not-determined	NA	0	UK	0.0210084	Yes
Xie_HL_2016_CS_37287.scaffold98187_1_155775	GUT_GENOME018608_1_36299	155775	Unassigned		Methanobacteriota	Methanobacteria	Methanobacteriales	Methanobacteriaceae	Methanobrevibacter_A	Methanobrevibacter_A smithii	VC_331_3	No	NA	Not-determined	NA	0	UK	0.0540966	No
Xie_HL_2016_CS_37292.scaffold13136_4_13311	GUT_GENOME259830_2_112204	13311	Unassigned		Methanobacteriota	Methanobacteria	Methanobacteriales	Methanobacteriaceae	Methanobrevibacter_A	Methanobrevibacter_A smithii	Outlier	No	NA	Not-determined	NA	0	UK	0.00157563	No
Xie_HL_2016_CS_37292.scaffold13136_5_11454	GUT_GENOME259830_2_112204	11454	Unassigned		Methanobacteriota	Methanobacteria	Methanobacteriales	Methanobacteriaceae	Methanobrevibacter_A	Methanobrevibacter_A smithii	Outlier	No	NA	Not-determined	NA	0	UK	0.00315126	No
Xie_HL_2016_CS_37292.scaffold52604_2_109429	GUT_GENOME279910_4_62128	109429	Unassigned		Methanobacteriota	Methanobacteria	Methanobacteriales	Methanobacteriaceae	Methanobrevibacter_A	Methanobrevibacter_A smithii	VC_332_1	No	NA	Not-determined	NA	0	UK	0.00105042	No
Xie_HL_2016_CS_37292.scaffold66410_2_7641	GUT_GENOME273866_45_581	7641	Unassigned		Methanobacteriota	Methanobacteria	Methanobacteriales	Methanobacteriaceae	Methanobrevibacter_A	Methanobrevibacter_A smithii	Overlap (VC_367/VC_373)	No	NA	Low-quality	20.05	0	UK	0	No
Xie_HL_2016_CS_37296.scaffold11220_2_278	GUT_GENOME018608_1_36299	278	Unassigned		Methanobacteriota	Methanobacteria	Methanobacteriales	Methanobacteriaceae	Methanobrevibacter_A	Methanobrevibacter_A smithii	Singleton	No	NA	Not-determined	NA	0	UK	0.00105042	Yes
Xie_HL_2016_CS_37296.scaffold11220_3_150981	GUT_GENOME018608_1_36299	150981	Unassigned		Methanobacteriota	Methanobacteria	Methanobacteriales	Methanobacteriaceae	Methanobrevibacter_A	Methanobrevibacter_A smithii	VC_331_3	No	NA	Not-determined	NA	0	UK	0.00052521	No
Xie_HL_2016_CS_37296.scaffold56973_2_220635	GUT_GENOME066320_3_57785	220635	Duplodnaviria;Heunggongvirae;Uroviricota;Caudoviricetes;Caudovirales	VOGdb markers	Methanobacteriota	Methanobacteria	Methanobacteriales	Methanobacteriaceae	Methanobrevibacter_A	Methanobrevibacter_A smithii_A	VC_357_0	No	NA	Not-determined	NA	0	UK	0.00210084	Yes
Xie_HL_2016_CS_37296.scaffold74674_1_112786	GUT_GENOME020562_14_876	112786	Unassigned		Methanobacteriota	Methanobacteria	Methanobacteriales	Methanobacteriaceae	Methanobrevibacter_A	Methanobrevibacter_A smithii_A	VC_334_1	No	NA	Not-determined	NA	0	UK	0.0252101	Yes
Xie_HL_2016_CS_37296.scaffold77563_1_112022	GUT_GENOME253955_2_249842	112022	Duplodnaviria;Heunggongvirae;Uroviricota;Caudoviricetes;Caudovirales;Myoviridae	VOGdb markers	Methanobacteriota	Methanobacteria	Methanobacteriales	Methanobacteriaceae	Methanobrevibacter_A	Methanobrevibacter_A smithii	VC_328_0	No	NA	Not-determined	NA	0	UK	0.00262605	No
Xie_HL_2016_CS_37296.scaffold88953_1_37098	CCIS38765456ST-20-0.NODE_125_97436	37098	Unassigned		Methanobacteriota	Methanobacteria	Methanobacteriales	Methanobacteriaceae	Methanobrevibacter_A	Methanobrevibacter_A smithii	Outlier	No	NA	High-quality	97.14	0	UK	0.0430672	Yes
Xie_HL_2016_CS_37296.scaffold89240_1_80626	GUT_GENOME279910_4_62128	80626	Unassigned		Methanobacteriota	Methanobacteria	Methanobacteriales	Methanobacteriaceae	Methanobrevibacter_A	Methanobrevibacter_A smithii	VC_332_1	No	NA	Not-determined	NA	0	UK	0.012605	No
Xie_HL_2016_CS_37314.scaffold39135_1_55043	GUT_GENOME279910_4_62128	55043	Unassigned		Methanobacteriota	Methanobacteria	Methanobacteriales	Methanobacteriaceae	Methanobrevibacter_A	Methanobrevibacter_A smithii	VC_332_1	No	NA	Not-determined	NA	0	UK	0.0257353	No
Xie_HL_2016_CS_37314.scaffold39135_2_4772	GUT_GENOME279910_4_62128	4772	Unassigned		Methanobacteriota	Methanobacteria	Methanobacteriales	Methanobacteriaceae	Methanobrevibacter_A	Methanobrevibacter_A smithii	Outlier	No	NA	Not-determined	NA	0	UK	0.0477941	No
Xie_HL_2016_CS_37314.scaffold39135_4_17757	GUT_GENOME279910_4_62128	17757	Unassigned		Methanobacteriota	Methanobacteria	Methanobacteriales	Methanobacteriaceae	Methanobrevibacter_A	Methanobrevibacter_A smithii	Outlier	No	NA	Not-determined	NA	0	UK	0.0257353	No
Xie_HL_2016_CS_37314.scaffold71134_1_32176	GUT_GENOME018608_1_39351	32176	Unassigned		Methanobacteriota	Methanobacteria	Methanobacteriales	Methanobacteriaceae	Methanobrevibacter_A	Methanobrevibacter_A smithii	Outlier	No	NA	Not-determined	NA	0	UK	0.00105042	No
Xie_HL_2016_CS_37314.scaffold8900_1_20354	GUT_GENOME018608_1_36299	20354	Unassigned		Methanobacteriota	Methanobacteria	Methanobacteriales	Methanobacteriaceae	Methanobrevibacter_A	Methanobrevibacter_A smithii	VC_355_0	No	NA	Not-determined	NA	0	UK	0.0052521	No
Xie_HL_2016_CS_37316.scaffold100036_1_35723	GUT_GENOME269219_18_19236	35723	Unassigned		Methanobacteriota	Methanobacteria	Methanobacteriales	Methanobacteriaceae	Methanobrevibacter_A	Methanobrevibacter_A smithii	Outlier	No	NA	Not-determined	NA	0	UK	0.0861345	No
Xie_HL_2016_CS_37316.scaffold100248_1_55873	ERR688624.NODE_1318_21	55873	Unassigned		Methanobacteriota	Methanobacteria	Methanobacteriales	Methanobacteriaceae	Methanobrevibacter_A	Methanobrevibacter_A smithii	Outlier	No	NA	Low-quality	4.63	0	UK	0.0435924	No
Xie_HL_2016_CS_37316.scaffold62740_1_203343	GUT_GENOME247414_2_5385	203343	Duplodnaviria;Heunggongvirae;Uroviricota;Caudoviricetes;Caudovirales	VOGdb markers	Methanobacteriota	Methanobacteria	Methanobacteriales	Methanobacteriaceae	Methanobrevibacter_A	Methanobrevibacter_A smithii	VC_357_0	No	NA	Not-determined	NA	0	UK	0.0257353	Yes
Xie_HL_2016_CS_37316.scaffold77520_1_216215	GUT_GENOME143185_16_1306	216215	Duplodnaviria;Heunggongvirae;Uroviricota;Caudoviricetes;Caudovirales	VOGdb markers	Methanobacteriota	Methanobacteria	Methanobacteriales	Methanobacteriaceae	Methanobrevibacter_A	Methanobrevibacter_A smithii_A	VC_329_8	No	NA	Not-determined	NA	0	UK	0.0220588	No
Xie_HL_2016_CS_37316.scaffold77520_2_12608	GUT_GENOME259830_2_112204	12608	Unassigned		Methanobacteriota	Methanobacteria	Methanobacteriales	Methanobacteriaceae	Methanobrevibacter_A	Methanobrevibacter_A smithii_A	Outlier	No	NA	Not-determined	NA	0	UK	0.019958	No
Xie_HL_2016_CS_37316.scaffold86172_1_74164	GUT_GENOME253955_2_249842	74164	Duplodnaviria;Heunggongvirae;Uroviricota;Caudoviricetes;Caudovirales;Myoviridae	VOGdb markers	Methanobacteriota	Methanobacteria	Methanobacteriales	Methanobacteriaceae	Methanobrevibacter_A	Methanobrevibacter_A smithii	VC_328_0	No	NA	Not-determined	NA	0	UK	0.268382	No
Xie_HL_2016_CS_37316.scaffold91326_1_190725	GUT_GENOME247693_325_79	190725	Unassigned		Methanobacteriota	Methanobacteria	Methanobacteriales	Methanobacteriaceae	Methanobrevibacter_A	Methanobrevibacter_A smithii	VC_331_13	No	NA	Not-determined	NA	0	UK	0.0220588	No
Xie_HL_2016_CS_37322.scaffold80583_1_26677	GUT_GENOME066320_3_57785	26677	Unassigned		Methanobacteriota	Methanobacteria	Methanobacteriales	Methanobacteriaceae	Methanobrevibacter_A	Methanobrevibacter_A smithii_A	Outlier	No	NA	Not-determined	NA	0	UK	0	Yes
Xie_HL_2016_CS_37322.scaffold9571_1_1034	GUT_GENOME252492_10_47820	1034	Unassigned		Methanobacteriota	Methanobacteria	Methanobacteriales	Methanobacteriaceae	Methanobrevibacter_A	Methanobrevibacter_A smithii	Outlier	No	NA	Low-quality	2.63	0	UK	0.0236345	Yes
Xie_HL_2016_CS_37322.scaffold9571_2_320	GUT_GENOME272466_3_105742	320	Unassigned		Methanobacteriota	Methanobacteria	Methanobacteriales	Methanobacteriaceae	Methanobrevibacter_A	Methanobrevibacter_A smithii	Singleton	No	NA	Not-determined	NA	0	UK	0.0231092	No
Xie_HL_2016_CS_37331.scaffold122191_1_98248	GUT_GENOME247693_325_79	98248	Unassigned		Methanobacteriota	Methanobacteria	Methanobacteriales	Methanobacteriaceae	Methanobrevibacter_A	Methanobrevibacter_A smithii	VC_331_3	No	NA	Not-determined	NA	0	UK	0.0231092	No
Xie_HL_2016_CS_37331.scaffold122253_1_107079	GUT_GENOME259830_2_112204	107079	Unassigned		Methanobacteriota	Methanobacteria	Methanobacteriales	Methanobacteriaceae	Methanobrevibacter_A	Methanobrevibacter_A smithii	Outlier	No	NA	Not-determined	NA	0	UK	0.0210084	No
Xie_HL_2016_CS_37331.scaffold122258_3_117516	GUT_GENOME279910_4_62128	117516	Unassigned		Methanobacteriota	Methanobacteria	Methanobacteriales	Methanobacteriaceae	Methanobrevibacter_A	Methanobrevibacter_A smithii	VC_332_1	No	NA	Not-determined	NA	0	UK	0	No
Xie_HL_2016_CS_37331.scaffold8280_1_127732	GUT_GENOME253955_2_249842	127732	Duplodnaviria;Heunggongvirae;Uroviricota;Caudoviricetes;Caudovirales;Myoviridae	VOGdb markers	Methanobacteriota	Methanobacteria	Methanobacteriales	Methanobacteriaceae	Methanobrevibacter_A	Methanobrevibacter_A smithii	VC_328_0	No	NA	Not-determined	NA	0	UK	0.0236345	No
Xie_HL_2016_CS_37331.scaffold93234_1_115446	GUT_GENOME143185_12_220085	115446	Unassigned		Methanobacteriota	Methanobacteria	Methanobacteriales	Methanobacteriaceae	Methanobrevibacter_A	Methanobrevibacter_A smithii_A	VC_334_1	No	NA	Not-determined	NA	0	UK	0.00420168	Yes
Xie_HL_2016_CS_37337.scaffold11191_1_130544	GUT_GENOME253955_2_249842	130544	Duplodnaviria;Heunggongvirae;Uroviricota;Caudoviricetes;Caudovirales;Myoviridae	VOGdb markers	Methanobacteriota	Methanobacteria	Methanobacteriales	Methanobacteriaceae	Methanobrevibacter_A	Methanobrevibacter_A smithii	VC_328_1	No	NA	Not-determined	NA	0	UK	0.0320378	No
Xie_HL_2016_CS_37337.scaffold129984_1_29000	GUT_GENOME265514_19_8607	29000	Unassigned		Methanobacteriota	Methanobacteria	Methanobacteriales	Methanobacteriaceae	Methanobrevibacter_A	Methanobrevibacter_A smithii	Outlier	No	NA	Not-determined	NA	0	UK	0.0189076	No
Xie_HL_2016_CS_37337.scaffold132881_1_71000	GUT_GENOME194277_1_110295	71000	Unassigned		Methanobacteriota	Methanobacteria	Methanobacteriales	Methanobacteriaceae	Methanobrevibacter_A	Methanobrevibacter_A smithii	VC_332_1	No	NA	Not-determined	NA	0	UK	0.00210084	No
Xie_HL_2016_CS_37337.scaffold64906_2_77255	GUT_GENOME018608_1_36299	77255	Unassigned		Methanobacteriota	Methanobacteria	Methanobacteriales	Methanobacteriaceae	Methanobrevibacter_A	Methanobrevibacter_A smithii	VC_331_3	No	NA	Not-determined	NA	0	UK	0.0231092	No
Xie_HL_2016_CS_37337.scaffold929_1_82446	GUT_GENOME018608_1_39351	82446	Unassigned		Methanobacteriota	Methanobacteria	Methanobacteriales	Methanobacteriaceae	Methanobrevibacter_A	Methanobrevibacter_A smithii	Outlier	No	NA	Not-determined	NA	0	UK	0.0136555	No
Xie_HL_2016_CS_37349.scaffold112904_3_47124	GUT_GENOME258086_2_60997	47124	Unassigned		Methanobacteriota	Methanobacteria	Methanobacteriales	Methanobacteriaceae	Methanobrevibacter_A	Methanobrevibacter_A smithii	Outlier	No	NA	Not-determined	NA	0	UK	0.0288866	No
Xie_HL_2016_CS_37349.scaffold128663_1_27606	CCIS38765456ST-20-0.NODE_125_97436	27606	Unassigned		Methanobacteriota	Methanobacteria	Methanobacteriales	Methanobacteriaceae	Methanobrevibacter_A	Methanobrevibacter_A smithii	Outlier	No	NA	Medium-quality	72.41	0	UK	0.0288866	Yes
Xie_HL_2016_CS_37349.scaffold133052_1_119836	GUT_GENOME011061_10_783	119836	Duplodnaviria;Heunggongvirae;Uroviricota;Caudoviricetes;Caudovirales	VOGdb markers	Methanobacteriota	Methanobacteria	Methanobacteriales	Methanobacteriaceae	Methanobrevibacter_A	Methanobrevibacter_A smithii	VC_329_5	No	NA	Medium-quality	73.86	0	UK	0.00105042	No
Xie_HL_2016_CS_37394.C163844_1_164	GUT_GENOME072661_77_238	164	Unassigned		Methanobacteriota	Methanobacteria	Methanobacteriales	Methanobacteriaceae	Methanobrevibacter_A	Methanobrevibacter_A smithii	Singleton	No	NA	Low-quality	0.09	0	UK	0.0257353	Yes
Xie_HL_2016_CS_37545.scaffold71593_1_36361	ERR710432.NODE_943_6498	36361	Duplodnaviria;Heunggongvirae;Uroviricota;Caudoviricetes;Caudovirales;Siphoviridae	Viral database	Methanobacteriota	Methanobacteria	Methanobacteriales	Methanobacteriaceae	Methanobrevibacter	Methanobrevibacter olleyae	VC_326_0	No	NA	High-quality	91.89	0	UK	0.00997899	Yes
Xie_HL_2016_CS_37651.scaffold75636_2_22678	SRR9655013.NODE_1263_8534	22678	Unassigned		Methanobacteriota	Methanobacteria	Methanobacteriales	Methanobacteriaceae	Methanobrevibacter_A	Methanobrevibacter_A smithii_A	Outlier	No	NA	Not-determined	NA	0	UK	0.0246849	No
Xie_HL_2016_CS_37651.scaffold81952_1_69977	GUT_GENOME261695_15_32706	69977	Duplodnaviria;Heunggongvirae;Uroviricota;Caudoviricetes;Caudovirales	VOGdb markers	Methanobacteriota	Methanobacteria	Methanobacteriales	Methanobacteriaceae	Methanobrevibacter_A	Methanobrevibacter_A smithii	VC_327_4	No	NA	Not-determined	NA	0	UK	0.0131303	No
Xie_HL_2016_CS_37651.scaffold877_1_38155	GUT_GENOME093215_4_44917	38155	Unassigned		Methanobacteriota	Methanobacteria	Methanobacteriales	Methanobacteriaceae	Methanobrevibacter_A	Methanobrevibacter_A smithii	Outlier	No	NA	Not-determined	NA	0	UK	0.00105042	No
Xie_HL_2016_CS_37651.scaffold877_7_68827	GUT_GENOME093215_4_44917	68827	Unassigned		Methanobacteriota	Methanobacteria	Methanobacteriales	Methanobacteriaceae	Methanobrevibacter_A	Methanobrevibacter_A smithii	Outlier	No	NA	Not-determined	NA	0	UK	0.00157563	No
Xie_HL_2016_CS_37753.scaffold110054_1_24214	ERR688624.NODE_1318_752	24214	Unassigned		Methanobacteriota	Methanobacteria	Methanobacteriales	Methanobacteriaceae	Methanobrevibacter_A	Methanobrevibacter_A smithii	Outlier	No	NA	Not-determined	NA	0	UK	0.0388655	No
Xie_HL_2016_CS_37753.scaffold54616_1_109361	GUT_GENOME251364_2_123712	109361	Unassigned		Methanobacteriota	Methanobacteria	Methanobacteriales	Methanobacteriaceae	Methanobrevibacter_A	Methanobrevibacter_A smithii_A	Outlier	No	NA	Not-determined	NA	0	UK	0.00315126	No
Xie_HL_2016_CS_37798.scaffold1028_2_59995	GUT_GENOME258086_2_60997	59995	Unassigned		Methanobacteriota	Methanobacteria	Methanobacteriales	Methanobacteriaceae	Methanobrevibacter_A	Methanobrevibacter_A smithii	Outlier	No	NA	Not-determined	NA	0	UK	0.0162815	No
Xie_HL_2016_CS_37798.scaffold6056_2_73780	GUT_GENOME183496_95_544	73780	Unassigned		Methanobacteriota	Methanobacteria	Methanobacteriales	Methanobacteriaceae	Methanobrevibacter_A	Methanobrevibacter_A smithii	Outlier	No	NA	Not-determined	NA	0	UK	0.0267857	No
Xie_HL_2016_CS_37798.scaffold69764_5_2842	GUT_GENOME250989_1_407944	2842	Unassigned		Methanobacteriota	Methanobacteria	Methanobacteriales	Methanobacteriaceae	Methanobrevibacter_A	Methanobrevibacter_A smithii	Singleton	No	NA	Not-determined	NA	0	UK	0.00052521	No
Xie_HL_2016_CS_37829.scaffold35971_3_5568	GUT_GENOME153214_10_46014	5568	Duplodnaviria;Heunggongvirae;Uroviricota;Caudoviricetes;Caudovirales	VOGdb markers	Methanobacteriota	Methanobacteria	Methanobacteriales	Methanobacteriaceae	Methanobrevibacter_A	Methanobrevibacter_A smithii	VC_378_0	No	NA	Low-quality	10.21	0	UK	0.0451681	Yes
Xie_HL_2016_CS_37829.scaffold35971_7_3324	GUT_GENOME153214_10_46014	3324	Unassigned		Methanobacteriota	Methanobacteria	Methanobacteriales	Methanobacteriaceae	Methanobrevibacter_A	Methanobrevibacter_A smithii	Outlier	No	NA	Low-quality	6.09	0	UK	0.0131303	Yes
Xie_HL_2016_CS_37829.scaffold35971_9_1037	GUT_GENOME153214_10_46014	1037	Unassigned		Methanobacteriota	Methanobacteria	Methanobacteriales	Methanobacteriaceae	Methanobrevibacter_A	Methanobrevibacter_A smithii	Singleton	No	NA	Not-determined	NA	0	UK	0.00052521	No
Zeller_G_2014_MSB_CCIS03473770ST-4-0.NODE_1735_11084	GUT_GENOME018608_1_39351	11084	Unassigned		Methanobacteriota	Methanobacteria	Methanobacteriales	Methanobacteriaceae	Methanobrevibacter_A	Methanobrevibacter_A smithii	Outlier	No	NA	Not-determined	NA	0	France	0.0262605	No
Zeller_G_2014_MSB_CCIS07539127ST-4-0.NODE_1177_32233	GUT_GENOME018608_1_39351	32233	Unassigned		Methanobacteriota	Methanobacteria	Methanobacteriales	Methanobacteriaceae	Methanobrevibacter_A	Methanobrevibacter_A smithii	VC_360_0	No	NA	Not-determined	NA	0	France	0	No
Zeller_G_2014_MSB_CCIS07539127ST-4-0.NODE_2059_20907	GUT_GENOME194277_1_110295	20907	Unassigned		Methanobacteriota	Methanobacteria	Methanobacteriales	Methanobacteriaceae	Methanobrevibacter_A	Methanobrevibacter_A smithii	Outlier	No	NA	Not-determined	NA	0	France	0.00052521	No
Zeller_G_2014_MSB_CCIS07539127ST-4-0.NODE_3257_14083	GUT_GENOME273866_45_728	14083	Unassigned		Methanobacteriota	Methanobacteria	Methanobacteriales	Methanobacteriaceae	Methanobrevibacter_A	Methanobrevibacter_A smithii	Outlier	No	NA	Low-quality	36.95	0	France	0.00157563	Yes
Zeller_G_2014_MSB_CCIS08668806ST-3-0.NODE_9765_1387	GUT_GENOME282742_6_115569	1387	Unassigned		Methanobacteriota	Methanobacteria	Methanobacteriales	Methanobacteriaceae	Methanobrevibacter_A	Methanobrevibacter_A smithii	Singleton	No	NA	Not-determined	NA	0	France	0.00157563	No
Zeller_G_2014_MSB_CCIS09568613ST-4-0.NODE_3642_10824	GUT_GENOME263468_1_482597	10824	Unassigned		Methanobacteriota	Methanobacteria	Methanobacteriales	Methanobacteriaceae	Methanobrevibacter_A	Methanobrevibacter_A woesei	Outlier	No	NA	Not-determined	NA	0	France	0.0236345	No
Zeller_G_2014_MSB_CCIS09568613ST-4-0.NODE_6420_5893	GUT_GENOME279910_4_62128	5893	Unassigned		Methanobacteriota	Methanobacteria	Methanobacteriales	Methanobacteriaceae	Methanobrevibacter_A	Methanobrevibacter_A smithii	Outlier	No	NA	Not-determined	NA	0	France	0.00210084	No
Zeller_G_2014_MSB_CCIS09568613ST-4-0.NODE_7869_4867	GUT_GENOME143185_12_220085	4867	Unassigned		Methanobacteriota	Methanobacteria	Methanobacteriales	Methanobacteriaceae	Methanobrevibacter_A	Methanobrevibacter_A smithii_A	Outlier	No	NA	Not-determined	NA	0	France	0.0283613	Yes
Zeller_G_2014_MSB_CCIS11354283ST-4-0.NODE_16_230593	GUT_GENOME194277_1_111100	230593	Unassigned		Methanobacteriota	Methanobacteria	Methanobacteriales	Methanobacteriaceae	Methanobrevibacter_A	Methanobrevibacter_A smithii	VC_331_13	No	NA	Not-determined	NA	0	France	0	No
Zeller_G_2014_MSB_CCIS11354283ST-4-0.NODE_187_74473	GUT_GENOME093215_4_44917	74473	Unassigned		Methanobacteriota	Methanobacteria	Methanobacteriales	Methanobacteriaceae	Methanobrevibacter_A	Methanobrevibacter_A smithii	Outlier	No	NA	Not-determined	NA	0	France	0.0183824	No
Zeller_G_2014_MSB_CCIS11354283ST-4-0.NODE_192_72734	GUT_GENOME282742_6_115569	72734	Unassigned		Methanobacteriota	Methanobacteria	Methanobacteriales	Methanobacteriaceae	Methanobrevibacter_A	Methanobrevibacter_A smithii	Outlier	No	NA	Not-determined	NA	0	France	0.00210084	No
Zeller_G_2014_MSB_CCIS11354283ST-4-0.NODE_198_72171	GUT_GENOME279910_4_62128	72171	Unassigned		Methanobacteriota	Methanobacteria	Methanobacteriales	Methanobacteriaceae	Methanobrevibacter_A	Methanobrevibacter_A smithii	VC_332_1	No	NA	Not-determined	NA	0	France	0.0173319	No
Zeller_G_2014_MSB_CCIS11354283ST-4-0.NODE_205_70326	GUT_GENOME143185_16_1306	70326	Duplodnaviria;Heunggongvirae;Uroviricota;Caudoviricetes;Caudovirales	VOGdb markers	Methanobacteriota	Methanobacteria	Methanobacteriales	Methanobacteriaceae	Methanobrevibacter_A	Methanobrevibacter_A smithii_A	VC_329_5	No	NA	Not-determined	NA	0	France	0.0178571	No
Zeller_G_2014_MSB_CCIS11354283ST-4-0.NODE_327_53116	GUT_GENOME259830_2_112204	53116	Unassigned		Methanobacteriota	Methanobacteria	Methanobacteriales	Methanobacteriaceae	Methanobrevibacter_A	Methanobrevibacter_A smithii	Outlier	No	NA	Not-determined	NA	0	France	0.0204832	No
Zeller_G_2014_MSB_CCIS11354283ST-4-0.NODE_502_39633	ERR688624.NODE_1318_21	39633	Unassigned		Methanobacteriota	Methanobacteria	Methanobacteriales	Methanobacteriaceae	Methanobrevibacter_A	Methanobrevibacter_A smithii	Outlier	No	NA	Not-determined	NA	0	France	0.0320378	No
Zeller_G_2014_MSB_CCIS11362406ST-4-0.NODE_17_238535	GUT_GENOME258086_2_60997	238535	Unassigned		Methanobacteriota	Methanobacteria	Methanobacteriales	Methanobacteriaceae	Methanobrevibacter_A	Methanobrevibacter_A smithii	VC_356_5	No	NA	Not-determined	NA	0	France	0.0315126	No
Zeller_G_2014_MSB_CCIS11362406ST-4-0.NODE_201_77477	GUT_GENOME269219_18_19236	77477	Unassigned		Methanobacteriota	Methanobacteria	Methanobacteriales	Methanobacteriaceae	Methanobrevibacter_A	Methanobrevibacter_A smithii	Outlier	No	NA	Not-determined	NA	0	France	0.00105042	No
Zeller_G_2014_MSB_CCIS11362406ST-4-0.NODE_232_72328	GUT_GENOME279910_4_62128	72328	Unassigned		Methanobacteriota	Methanobacteria	Methanobacteriales	Methanobacteriaceae	Methanobrevibacter_A	Methanobrevibacter_A smithii	VC_332_1	No	NA	Not-determined	NA	0	France	0.0173319	No
Zeller_G_2014_MSB_CCIS11362406ST-4-0.NODE_283_65306	GUT_GENOME107745_54_7356	65306	Unassigned		Methanobacteriota	Methanobacteria	Methanobacteriales	Methanobacteriaceae	Methanobrevibacter_A	Methanobrevibacter_A smithii	VC_331_3	No	NA	Not-determined	NA	0	France	0.00105042	No
Zeller_G_2014_MSB_CCIS11362406ST-4-0.NODE_361_54653	GUT_GENOME284814_21_16225	54653	Unassigned		Methanobacteriota	Methanobacteria	Methanobacteriales	Methanobacteriaceae	Methanobrevibacter_A	Methanobrevibacter_A smithii_A	Outlier	No	NA	Not-determined	NA	0	France	0.0204832	No
Zeller_G_2014_MSB_CCIS11362406ST-4-0.NODE_458_45464	GUT_GENOME018608_1_36299	45464	Unassigned		Methanobacteriota	Methanobacteria	Methanobacteriales	Methanobacteriaceae	Methanobrevibacter_A	Methanobrevibacter_A smithii	VC_355_0	No	NA	Not-determined	NA	0	France	0.0252101	No
Zeller_G_2014_MSB_CCIS11362406ST-4-0.NODE_94_124737	GUT_GENOME265514_19_8607	124737	Unassigned		Methanobacteriota	Methanobacteria	Methanobacteriales	Methanobacteriaceae	Methanobrevibacter_A	Methanobrevibacter_A smithii	Outlier	No	NA	Not-determined	NA	0	France	0.00210084	No
Zeller_G_2014_MSB_CCIS12656533ST-4-0.NODE_433_38115	GUT_GENOME283332_4_57650	38115	Unassigned		Thermoplasmatota	Thermoplasmata	Methanomassiliicoccales	Methanomethylophilaceae	UBA71	Unassigned	Outlier	No	NA	Low-quality	43.85	0	France	0	Yes
Zeller_G_2014_MSB_CCIS12656533ST-4-0.NODE_55_132509	GUT_GENOME261695_15_32706	132509	Duplodnaviria;Heunggongvirae;Uroviricota;Caudoviricetes;Caudovirales	VOGdb markers	Methanobacteriota	Methanobacteria	Methanobacteriales	Methanobacteriaceae	Methanobrevibacter_A	Methanobrevibacter_A smithii	VC_327_3	No	NA	Not-determined	NA	0	France	0.00105042	No
Zeller_G_2014_MSB_CCIS12656533ST-4-0.NODE_599_29852	GUT_GENOME279910_4_62128	29852	Unassigned		Methanobacteriota	Methanobacteria	Methanobacteriales	Methanobacteriaceae	Methanobrevibacter_A	Methanobrevibacter_A smithii	Outlier	No	NA	Not-determined	NA	0	France	0.0309874	No
Zeller_G_2014_MSB_CCIS12656533ST-4-0.NODE_97_102319	GUT_GENOME257377_3_111501	102319	Unassigned		Methanobacteriota	Methanobacteria	Methanobacteriales	Methanobacteriaceae	Methanobrevibacter_A	Methanobrevibacter_A smithii	VC_356_0	No	NA	Not-determined	NA	0	France	0.0388655	No
Zeller_G_2014_MSB_CCIS20795251ST-4-0.NODE_118_96873	GUT_GENOME143185_16_1306	96873	Duplodnaviria;Heunggongvirae;Uroviricota;Caudoviricetes;Caudovirales	VOGdb markers	Methanobacteriota	Methanobacteria	Methanobacteriales	Methanobacteriaceae	Methanobrevibacter_A	Methanobrevibacter_A smithii_A	VC_329_9	No	NA	Not-determined	NA	0	France	0.00052521	No
Zeller_G_2014_MSB_CCIS20795251ST-4-0.NODE_136_87609	GUT_GENOME261695_15_32706	87609	Duplodnaviria;Heunggongvirae;Uroviricota;Caudoviricetes;Caudovirales	VOGdb markers	Methanobacteriota	Methanobacteria	Methanobacteriales	Methanobacteriaceae	Methanobrevibacter_A	Methanobrevibacter_A smithii	VC_327_4	No	NA	Not-determined	NA	0	France	0.0204832	No
Zeller_G_2014_MSB_CCIS20795251ST-4-0.NODE_198_73461	GUT_GENOME269219_18_19236	73461	Unassigned		Methanobacteriota	Methanobacteria	Methanobacteriales	Methanobacteriaceae	Methanobrevibacter_A	Methanobrevibacter_A smithii	Outlier	No	NA	Not-determined	NA	0	France	0.00105042	No
Zeller_G_2014_MSB_CCIS20795251ST-4-0.NODE_35_185776	GUT_GENOME143185_12_220085	185776	Unassigned		Methanobacteriota	Methanobacteria	Methanobacteriales	Methanobacteriaceae	Methanobrevibacter_A	Methanobrevibacter_A smithii_A	VC_334_1	No	NA	Not-determined	NA	0	France	0.0420168	Yes
Zeller_G_2014_MSB_CCIS20795251ST-4-0.NODE_44_155580	GUT_GENOME247414_2_5385	155580	Duplodnaviria;Heunggongvirae;Uroviricota;Caudoviricetes;Caudovirales	VOGdb markers	Methanobacteriota	Methanobacteria	Methanobacteriales	Methanobacteriaceae	Methanobrevibacter_A	Methanobrevibacter_A smithii	VC_357_1	No	NA	High-quality	100	0	France	0.00682773	Yes
Zeller_G_2014_MSB_CCIS20795251ST-4-0.NODE_83_111193	GUT_GENOME246782_8_59663	111193	Unassigned		Methanobacteriota	Methanobacteria	Methanobacteriales	Methanobacteriaceae	Methanobrevibacter_A	Methanobrevibacter_A smithii	VC_331_12	No	NA	Not-determined	NA	0	France	0.00105042	No
Zeller_G_2014_MSB_CCIS20795251ST-4-0.NODE_90_109168	GUT_GENOME259830_2_112204	109168	Unassigned		Methanobacteriota	Methanobacteria	Methanobacteriales	Methanobacteriaceae	Methanobrevibacter_A	Methanobrevibacter_A smithii	Outlier	No	NA	Not-determined	NA	0	France	0.00157563	No
Zeller_G_2014_MSB_CCIS21126322ST-4-0.NODE_10_231840	GUT_GENOME194277_1_111100	231840	Unassigned		Methanobacteriota	Methanobacteria	Methanobacteriales	Methanobacteriaceae	Methanobrevibacter_A	Methanobrevibacter_A smithii	VC_331_13	No	NA	Not-determined	NA	0	France	0.0409664	No
Zeller_G_2014_MSB_CCIS21126322ST-4-0.NODE_105_100251	GUT_GENOME279910_4_62128	100251	Unassigned		Methanobacteriota	Methanobacteria	Methanobacteriales	Methanobacteriaceae	Methanobrevibacter_A	Methanobrevibacter_A smithii	VC_332_1	No	NA	Not-determined	NA	0	France	0.00052521	No
Zeller_G_2014_MSB_CCIS21126322ST-4-0.NODE_285_60873	GUT_GENOME261695_15_32706	60873	Duplodnaviria;Heunggongvirae;Uroviricota;Caudoviricetes;Caudovirales	VOGdb markers	Methanobacteriota	Methanobacteria	Methanobacteriales	Methanobacteriaceae	Methanobrevibacter_A	Methanobrevibacter_A smithii	VC_327_4	No	NA	Not-determined	NA	0	France	0.0168067	No
Zeller_G_2014_MSB_CCIS21126322ST-4-0.NODE_596_34791	SRR9655013.NODE_1263_8534	34791	Unassigned		Methanobacteriota	Methanobacteria	Methanobacteriales	Methanobacteriaceae	Methanobrevibacter_A	Methanobrevibacter_A smithii_A	Outlier	No	NA	Not-determined	NA	0	France	0.0336134	No
Zeller_G_2014_MSB_CCIS21278152ST-4-0.NODE_1557_13432	GUT_GENOME018608_1_39351	13432	Unassigned		Methanobacteriota	Methanobacteria	Methanobacteriales	Methanobacteriaceae	Methanobrevibacter_A	Methanobrevibacter_A smithii	Outlier	No	NA	Not-determined	NA	0	France	0.029937	No
Zeller_G_2014_MSB_CCIS21278152ST-4-0.NODE_472_27354	GUT_GENOME183496_95_544	27354	Unassigned		Methanobacteriota	Methanobacteria	Methanobacteriales	Methanobacteriaceae	Methanobrevibacter_A	Methanobrevibacter_A smithii	Outlier	No	NA	Not-determined	NA	0	France	0.0493697	No
Zeller_G_2014_MSB_CCIS22416007ST-4-0.NODE_51163_757	GUT_GENOME255730_29_7660	757	Unassigned		Methanobacteriota	Methanobacteria	Methanobacteriales	Methanobacteriaceae	Methanobrevibacter_A	Methanobrevibacter_A smithii	Overlap (VC_366/VC_369)	No	NA	Low-quality	2	0	France	0.00315126	No
Zeller_G_2014_MSB_CCIS25399172ST-4-0.NODE_177014_301	GUT_GENOME025992_50_6357	301	Unassigned		Methanobacteriota	Methanobacteria	Methanobacteriales	Methanobacteriaceae	Methanobrevibacter_A	Methanobrevibacter_A smithii	Singleton	No	NA	Not-determined	NA	0	France	0.0236345	No
Zeller_G_2014_MSB_CCIS25399172ST-4-0.NODE_81883_484	35505.scaffold72886_2_402	484	Unassigned		Methanobacteriota	Methanobacteria	Methanobacteriales	Methanobacteriaceae	Methanobrevibacter_A	Methanobrevibacter_A smithii	Singleton	No	NA	Not-determined	NA	0	France	0.00210084	No
Zeller_G_2014_MSB_CCIS27304052ST-3-0.NODE_21_120274	GUT_GENOME247693_325_79	120274	Unassigned		Methanobacteriota	Methanobacteria	Methanobacteriales	Methanobacteriaceae	Methanobrevibacter_A	Methanobrevibacter_A smithii	VC_331_3	No	NA	Not-determined	NA	0	France	0.00840336	No
Zeller_G_2014_MSB_CCIS27304052ST-3-0.NODE_42_82956	ERR688624.NODE_1318_21	82956	Unassigned		Methanobacteriota	Methanobacteria	Methanobacteriales	Methanobacteriaceae	Methanobrevibacter_A	Methanobrevibacter_A smithii	Outlier	No	NA	Low-quality	6.87	0	France	0.00892857	No
Zeller_G_2014_MSB_CCIS27304052ST-3-0.NODE_5_180589	GUT_GENOME011061_10_783	180589	Duplodnaviria;Heunggongvirae;Uroviricota;Caudoviricetes;Caudovirales	VOGdb markers	Methanobacteriota	Methanobacteria	Methanobacteriales	Methanobacteriaceae	Methanobrevibacter_A	Methanobrevibacter_A smithii	VC_329_6	No	NA	Not-determined	NA	0	France	0.00210084	No
Zeller_G_2014_MSB_CCIS27304052ST-3-0.NODE_62_72071	GUT_GENOME268434_7_1368	72071	Unassigned		Methanobacteriota	Methanobacteria	Methanobacteriales	Methanobacteriaceae	Methanobrevibacter_A	Methanobrevibacter_A smithii	VC_333_0	No	NA	Not-determined	NA	0	France	0.022584	No
Zeller_G_2014_MSB_CCIS32105356ST-4-0.NODE_17677_1578	GUT_GENOME265514_3_164993	1578	Unassigned		Methanobacteriota	Methanobacteria	Methanobacteriales	Methanobacteriaceae	Methanobrevibacter_A	Methanobrevibacter_A smithii	VC_494_0	No	NA	Not-determined	NA	0	France	0.00210084	No
Zeller_G_2014_MSB_CCIS32452666ST-4-0.NODE_23024_1874	GUT_GENOME143185_16_1306	1874	Unassigned		Methanobacteriota	Methanobacteria	Methanobacteriales	Methanobacteriaceae	Methanobrevibacter_A	Methanobrevibacter_A smithii_A	Singleton	No	NA	Not-determined	NA	0	France	0.0236345	No
Zeller_G_2014_MSB_CCIS33816588ST-4-0.NODE_104_125636	GUT_GENOME259830_2_112204	125636	Duplodnaviria;Heunggongvirae;Uroviricota;Caudoviricetes;Caudovirales	VOGdb markers	Methanobacteriota	Methanobacteria	Methanobacteriales	Methanobacteriaceae	Methanobrevibacter_A	Methanobrevibacter_A smithii	VC_329_6	No	NA	Not-determined	NA	0	France	0.0357143	No
Zeller_G_2014_MSB_CCIS33816588ST-4-0.NODE_11_281354	GUT_GENOME258086_2_60997	281354	Unassigned		Methanobacteriota	Methanobacteria	Methanobacteriales	Methanobacteriaceae	Methanobrevibacter_A	Methanobrevibacter_A smithii	VC_356_4	No	NA	Not-determined	NA	0	France	0.0131303	No
Zeller_G_2014_MSB_CCIS33816588ST-4-0.NODE_127_111595	GUT_GENOME261695_15_32706	111595	Duplodnaviria;Heunggongvirae;Uroviricota;Caudoviricetes;Caudovirales	VOGdb markers	Methanobacteriota	Methanobacteria	Methanobacteriales	Methanobacteriaceae	Methanobrevibacter_A	Methanobrevibacter_A smithii	VC_327_4	No	NA	Not-determined	NA	0	France	0.019958	No
Zeller_G_2014_MSB_CCIS33816588ST-4-0.NODE_354_63737	GUT_GENOME269219_18_19236	63737	Unassigned		Methanobacteriota	Methanobacteria	Methanobacteriales	Methanobacteriaceae	Methanobrevibacter_A	Methanobrevibacter_A smithii	Outlier	No	NA	Not-determined	NA	0	France	0.0215336	No
Zeller_G_2014_MSB_CCIS33816588ST-4-0.NODE_36_191641	GUT_GENOME143185_12_220085	191641	Unassigned		Methanobacteriota	Methanobacteria	Methanobacteriales	Methanobacteriaceae	Methanobrevibacter_A	Methanobrevibacter_A smithii_A	VC_334_1	No	NA	High-quality	100	0	France	0.00210084	Yes
Zeller_G_2014_MSB_CCIS33816588ST-4-0.NODE_43_180406	GUT_GENOME247693_325_79	180406	Unassigned		Methanobacteriota	Methanobacteria	Methanobacteriales	Methanobacteriaceae	Methanobrevibacter_A	Methanobrevibacter_A smithii	VC_331_1	No	NA	Not-determined	NA	0	France	0.0157563	No
Zeller_G_2014_MSB_CCIS33816588ST-4-0.NODE_804_35379	GUT_GENOME194277_1_110295	35379	Unassigned		Methanobacteriota	Methanobacteria	Methanobacteriales	Methanobacteriaceae	Methanobrevibacter_A	Methanobrevibacter_A smithii	Outlier	No	NA	Not-determined	NA	0	France	0.0283613	No
Zeller_G_2014_MSB_CCIS35100175ST-4-0.NODE_2140_12466	CCIS38765456ST-20-0.NODE_125_97369	12466	Unassigned		Methanobacteriota	Methanobacteria	Methanobacteriales	Methanobacteriaceae	Methanobrevibacter_A	Methanobrevibacter_A smithii	Outlier	No	NA	Not-determined	NA	0	France	0.00210084	No
Zeller_G_2014_MSB_CCIS36797902ST-4-0.NODE_52_153299	GUT_GENOME283332_4_56126	153299	Unassigned		Thermoplasmatota	Thermoplasmata	Methanomassiliicoccales	Methanomethylophilaceae	UBA71	Unassigned	Outlier	No	NA	Not-determined	NA	0	France	0.0294118	No
Zeller_G_2014_MSB_CCIS38765456ST-20-0.NODE_145_90563	GUT_GENOME279910_4_62128	90563	Unassigned		Methanobacteriota	Methanobacteria	Methanobacteriales	Methanobacteriaceae	Methanobrevibacter_A	Methanobrevibacter_A smithii	VC_332_1	No	NA	Not-determined	NA	0	France	0.032563	No
Zeller_G_2014_MSB_CCIS38765456ST-20-0.NODE_173_79519	ERR688624.NODE_1318_21	79519	Unassigned		Methanobacteriota	Methanobacteria	Methanobacteriales	Methanobacteriaceae	Methanobrevibacter_A	Methanobrevibacter_A smithii	Outlier	No	NA	Low-quality	6.59	0	France	0.032563	No
Zeller_G_2014_MSB_CCIS38765456ST-20-0.NODE_30_190314	GUT_GENOME247693_325_79	190314	Unassigned		Methanobacteriota	Methanobacteria	Methanobacteriales	Methanobacteriaceae	Methanobrevibacter_A	Methanobrevibacter_A smithii	VC_334_2	No	NA	Not-determined	NA	0	France	0.0462185	No
Zeller_G_2014_MSB_CCIS38765456ST-20-0.NODE_319_58592	GUT_GENOME018608_1_39351	58592	Unassigned		Methanobacteriota	Methanobacteria	Methanobacteriales	Methanobacteriaceae	Methanobrevibacter_A	Methanobrevibacter_A smithii	Outlier	No	NA	Not-determined	NA	0	France	0.0357143	No
Zeller_G_2014_MSB_CCIS38765456ST-20-0.NODE_584_39518	GUT_GENOME066320_3_57639	39518	Unassigned		Methanobacteriota	Methanobacteria	Methanobacteriales	Methanobacteriaceae	Methanobrevibacter_A	Methanobrevibacter_A smithii_A	Outlier	No	NA	Not-determined	NA	0	France	0.0246849	No
Zeller_G_2014_MSB_CCIS38765456ST-20-0.NODE_7_307605	GUT_GENOME247414_2_5385	307605	Duplodnaviria;Heunggongvirae;Uroviricota;Caudoviricetes;Caudovirales	VOGdb markers	Methanobacteriota	Methanobacteria	Methanobacteriales	Methanobacteriaceae	Methanobrevibacter_A	Methanobrevibacter_A smithii	VC_357_6	No	NA	Not-determined	NA	0	France	0.0105042	Yes
Zeller_G_2014_MSB_CCIS41222843ST-4-0.NODE_167_90094	GUT_GENOME279910_4_62128	90094	Unassigned		Methanobacteriota	Methanobacteria	Methanobacteriales	Methanobacteriaceae	Methanobrevibacter_A	Methanobrevibacter_A smithii	VC_332_1	No	NA	Not-determined	NA	0	France	0.0246849	No
Zeller_G_2014_MSB_CCIS41222843ST-4-0.NODE_24_238085	GUT_GENOME247414_2_5385	238085	Duplodnaviria;Heunggongvirae;Uroviricota;Caudoviricetes;Caudovirales	VOGdb markers	Methanobacteriota	Methanobacteria	Methanobacteriales	Methanobacteriaceae	Methanobrevibacter_A	Methanobrevibacter_A smithii	VC_357_6	No	NA	Not-determined	NA	0	France	0.0231092	Yes
Zeller_G_2014_MSB_CCIS41222843ST-4-0.NODE_243_73151	GUT_GENOME093215_4_44917	73151	Unassigned		Methanobacteriota	Methanobacteria	Methanobacteriales	Methanobacteriaceae	Methanobrevibacter_A	Methanobrevibacter_A smithii	Outlier	No	NA	Not-determined	NA	0	France	0.00997899	No
Zeller_G_2014_MSB_CCIS41222843ST-4-0.NODE_368_55544	GUT_GENOME269219_18_19236	55544	Unassigned		Methanobacteriota	Methanobacteria	Methanobacteriales	Methanobacteriaceae	Methanobrevibacter_A	Methanobrevibacter_A smithii	Outlier	No	NA	Not-determined	NA	0	France	0.00052521	No
Zeller_G_2014_MSB_CCIS41222843ST-4-0.NODE_41_184106	GUT_GENOME143185_12_220085	184106	Unassigned		Methanobacteriota	Methanobacteria	Methanobacteriales	Methanobacteriaceae	Methanobrevibacter_A	Methanobrevibacter_A smithii_A	VC_334_1	No	NA	Not-determined	NA	0	France	0.00052521	Yes
Zeller_G_2014_MSB_CCIS41222843ST-4-0.NODE_534_44380	GUT_GENOME194277_1_110295	44380	Unassigned		Methanobacteriota	Methanobacteria	Methanobacteriales	Methanobacteriaceae	Methanobrevibacter_A	Methanobrevibacter_A smithii	Outlier	No	NA	Not-determined	NA	0	France	0.0194328	No
Zeller_G_2014_MSB_CCIS41222843ST-4-0.NODE_57_148567	GUT_GENOME258086_2_60997	148567	Unassigned		Methanobacteriota	Methanobacteria	Methanobacteriales	Methanobacteriaceae	Methanobrevibacter_A	Methanobrevibacter_A smithii	VC_356_2	No	NA	Not-determined	NA	0	France	0.019958	No
Zeller_G_2014_MSB_CCIS41222843ST-4-0.NODE_72_135853	GUT_GENOME143185_16_1306	135853	Duplodnaviria;Heunggongvirae;Uroviricota;Caudoviricetes;Caudovirales	VOGdb markers	Methanobacteriota	Methanobacteria	Methanobacteriales	Methanobacteriaceae	Methanobrevibacter_A	Methanobrevibacter_A smithii_A	VC_329_5	No	NA	Not-determined	NA	0	France	0.00105042	No
Zeller_G_2014_MSB_CCIS41222843ST-4-0.NODE_90_122559	GUT_GENOME253955_2_249842	122559	Duplodnaviria;Heunggongvirae;Uroviricota;Caudoviricetes;Caudovirales;Myoviridae	VOGdb markers	Methanobacteriota	Methanobacteria	Methanobacteriales	Methanobacteriaceae	Methanobrevibacter_A	Methanobrevibacter_A smithii	VC_328_0	No	NA	Not-determined	NA	0	France	0.00105042	No
Zeller_G_2014_MSB_CCIS41806458ST-4-0.NODE_1_544666	GUT_GENOME247414_2_5385	544666	Duplodnaviria;Heunggongvirae;Uroviricota;Caudoviricetes;Caudovirales	VOGdb markers	Methanobacteriota	Methanobacteria	Methanobacteriales	Methanobacteriaceae	Methanobrevibacter_A	Methanobrevibacter_A smithii	Overlap (VC_357/VC_358)	No	NA	Not-determined	NA	0	France	0.00105042	Yes
Zeller_G_2014_MSB_CCIS41806458ST-4-0.NODE_14_266207	GUT_GENOME279910_4_62128	266207	Unassigned		Methanobacteriota	Methanobacteria	Methanobacteriales	Methanobacteriaceae	Methanobrevibacter_A	Methanobrevibacter_A smithii	VC_332_0	No	NA	Not-determined	NA	0	France	0.022584	No
Zeller_G_2014_MSB_CCIS41806458ST-4-0.NODE_2_497964	GUT_GENOME260946_11_1637	497964	Unassigned		Methanobacteriota	Methanobacteria	Methanobacteriales	Methanobacteriaceae	Methanobrevibacter_A	Methanobrevibacter_A smithii_A	VC_331_10	No	NA	High-quality	100	0	France	0.0236345	Yes
Zeller_G_2014_MSB_CCIS44757994ST-4-0.NODE_145074_341	GUT_GENOME068190_13_66046	341	Duplodnaviria;Heunggongvirae;Uroviricota;Caudoviricetes;Caudovirales	Eggnog markers	Methanobacteriota	Methanobacteria	Methanobacteriales	Methanobacteriaceae	Methanobrevibacter_A	Methanobrevibacter_A smithii	Singleton	No	NA	Not-determined	NA	0	France	0.00052521	No
Zeller_G_2014_MSB_CCIS44757994ST-4-0.NODE_160959_316	GUT_GENOME239209_5_162	316	Unassigned		Methanobacteriota	Methanobacteria	Methanobacteriales	Methanobacteriaceae	Methanobrevibacter_A	Methanobrevibacter_A smithii_A	Singleton	No	NA	Not-determined	NA	0	France	0.00210084	No
Zeller_G_2014_MSB_CCIS44757994ST-4-0.NODE_168424_306	GUT_GENOME283326_2_366720	306	Unassigned		Methanobacteriota	Methanobacteria	Methanobacteriales	Methanobacteriaceae	Methanobrevibacter_A	Methanobrevibacter_A smithii	Singleton	No	NA	Not-determined	NA	0	France	0.00052521	No
Zeller_G_2014_MSB_CCIS44757994ST-4-0.NODE_21853_1320	CCIS81710917ST-20-0.NODE_1493_16229	1320	Unassigned		Methanobacteriota	Methanobacteria	Methanobacteriales	Methanobacteriaceae	Methanobrevibacter_A	Methanobrevibacter_A smithii	Singleton	No	NA	Not-determined	NA	0	France	0.00105042	No
Zeller_G_2014_MSB_CCIS45793747ST-4-0.NODE_7971_5271	GUT_GENOME273630_6_81210	5271	Unassigned		Methanobacteriota	Methanobacteria	Methanobacteriales	Methanobacteriaceae	Methanobrevibacter_A	Methanobrevibacter_A smithii	Singleton	No	NA	Not-determined	NA	0	France	0.0294118	No
Zeller_G_2014_MSB_CCIS47284573ST-4-0.NODE_27503_1415	SRR9655013.NODE_1263_8534	1415	Unassigned		Methanobacteriota	Methanobacteria	Methanobacteriales	Methanobacteriaceae	Methanobrevibacter_A	Methanobrevibacter_A smithii_A	Singleton	No	NA	Low-quality	3.49	0	France	0.0141807	No
Zeller_G_2014_MSB_CCIS47284573ST-4-0.NODE_5263_5340	GUT_GENOME273866_45_728	5340	Unassigned		Methanobacteriota	Methanobacteria	Methanobacteriales	Methanobacteriaceae	Methanobrevibacter_A	Methanobrevibacter_A smithii	Outlier	No	NA	Low-quality	14.01	0	France	0	Yes
Zeller_G_2014_MSB_CCIS48579360ST-4-0.NODE_15068_1144	GUT_GENOME093513_4_13112	1144	Unassigned		Methanobacteriota	Methanobacteria	Methanobacteriales	Methanobacteriaceae	Methanobrevibacter_A	Methanobrevibacter_A smithii	Overlap (VC_366/VC_369)	No	NA	Low-quality	3.01	0	France	0.0162815	Yes
Zeller_G_2014_MSB_CCIS48579360ST-4-0.NODE_17671_1024	GUT_GENOME257377_3_107926	1024	Unassigned		Methanobacteriota	Methanobacteria	Methanobacteriales	Methanobacteriaceae	Methanobrevibacter_A	Methanobrevibacter_A smithii	Singleton	No	NA	Not-determined	NA	0	France	0.0493697	No
Zeller_G_2014_MSB_CCIS48579360ST-4-0.NODE_27116_774	GUT_GENOME257758_18_4667	774	Unassigned		Methanobacteriota	Methanobacteria	Methanobacteriales	Methanobacteriaceae	Methanobrevibacter_A	Methanobrevibacter_A smithii	Singleton	No	NA	Low-quality	2.03	0	France	0.0241597	No
Zeller_G_2014_MSB_CCIS50471204ST-4-0.NODE_1448_28286	GUT_GENOME259830_2_112204	28286	Unassigned		Methanobacteriota	Methanobacteria	Methanobacteriales	Methanobacteriaceae	Methanobrevibacter_A	Methanobrevibacter_A smithii	Outlier	No	NA	Not-determined	NA	0	France	0.0273109	No
Zeller_G_2014_MSB_CCIS50471204ST-4-0.NODE_209_101382	GUT_GENOME018608_1_36299	101382	Unassigned		Methanobacteriota	Methanobacteria	Methanobacteriales	Methanobacteriaceae	Methanobrevibacter_A	Methanobrevibacter_A smithii	VC_331_3	No	NA	Not-determined	NA	0	France	0	No
Zeller_G_2014_MSB_CCIS50471204ST-4-0.NODE_275_89235	GUT_GENOME066320_3_57785	89235	Duplodnaviria;Heunggongvirae;Uroviricota;Caudoviricetes;Caudovirales	VOGdb markers	Methanobacteriota	Methanobacteria	Methanobacteriales	Methanobacteriaceae	Methanobrevibacter_A	Methanobrevibacter_A smithii_A	VC_357_2	No	NA	Not-determined	NA	0	France	0	Yes
Zeller_G_2014_MSB_CCIS50471204ST-4-0.NODE_727_50333	GUT_GENOME279910_4_62128	50333	Unassigned		Methanobacteriota	Methanobacteria	Methanobacteriales	Methanobacteriaceae	Methanobrevibacter_A	Methanobrevibacter_A smithii	VC_332_1	No	NA	Not-determined	NA	0	France	0.00472689	No
Zeller_G_2014_MSB_CCIS50471204ST-4-0.NODE_949_40643	ERR688593.NODE_1068_20580	40643	Unassigned		Methanobacteriota	Methanobacteria	Methanobacteriales	Methanobacteriaceae	Methanobrevibacter_A	Methanobrevibacter_A smithii_A	Outlier	No	NA	Not-determined	NA	0	France	0.00997899	No
Zeller_G_2014_MSB_CCIS51667829ST-4-0.NODE_1310_22053	GUT_GENOME194277_1_111100	22053	Unassigned		Methanobacteriota	Methanobacteria	Methanobacteriales	Methanobacteriaceae	Methanobrevibacter_A	Methanobrevibacter_A smithii	VC_361_0	No	NA	Not-determined	NA	0	France	0	No
Zeller_G_2014_MSB_CCIS51667829ST-4-0.NODE_16171_2775	GUT_GENOME247693_325_79	2775	Unassigned		Methanobacteriota	Methanobacteria	Methanobacteriales	Methanobacteriaceae	Methanobrevibacter_A	Methanobrevibacter_A smithii	Singleton	No	NA	Not-determined	NA	0	France	0.0236345	No
Zeller_G_2014_MSB_CCIS52234160ST-4-0.NODE_117_85276	GUT_GENOME250989_1_407944	85276	Duplodnaviria;Heunggongvirae;Uroviricota;Caudoviricetes;Caudovirales	VOGdb markers	Methanobacteriota	Methanobacteria	Methanobacteriales	Methanobacteriaceae	Methanobrevibacter_A	Methanobrevibacter_A smithii	VC_357_2	No	NA	Not-determined	NA	0	France	0.00210084	No
Zeller_G_2014_MSB_CCIS52234160ST-4-0.NODE_453_31753	GUT_GENOME259830_2_112204	31753	Unassigned		Methanobacteriota	Methanobacteria	Methanobacteriales	Methanobacteriaceae	Methanobrevibacter_A	Methanobrevibacter_A smithii	Outlier	No	NA	Not-determined	NA	0	France	0.0136555	No
Zeller_G_2014_MSB_CCIS52234160ST-4-0.NODE_68_111308	GUT_GENOME143185_12_220085	111308	Unassigned		Methanobacteriota	Methanobacteria	Methanobacteriales	Methanobacteriaceae	Methanobrevibacter_A	Methanobrevibacter_A smithii_A	VC_334_1	No	NA	Not-determined	NA	0	France	0.0504202	Yes
Zeller_G_2014_MSB_CCIS52234160ST-4-0.NODE_8_235667	GUT_GENOME194277_1_111100	235667	Unassigned		Methanobacteriota	Methanobacteria	Methanobacteriales	Methanobacteriaceae	Methanobrevibacter_A	Methanobrevibacter_A smithii	VC_331_13	No	NA	Not-determined	NA	0	France	0.042542	No
Zeller_G_2014_MSB_CCIS53355328ST-4-0.NODE_143_52849	ERR688624.NODE_1318_21	52849	Unassigned		Methanobacteriota	Methanobacteria	Methanobacteriales	Methanobacteriaceae	Methanobrevibacter_A	Methanobrevibacter_A smithii	Outlier	No	NA	Not-determined	NA	0	France	0.0052521	No
Zeller_G_2014_MSB_CCIS53355328ST-4-0.NODE_18_147077	GUT_GENOME259830_2_112204	147077	Duplodnaviria;Heunggongvirae;Uroviricota;Caudoviricetes;Caudovirales	VOGdb markers	Methanobacteriota	Methanobacteria	Methanobacteriales	Methanobacteriaceae	Methanobrevibacter_A	Methanobrevibacter_A smithii	VC_329_6	No	NA	Not-determined	NA	0	France	0	No
Zeller_G_2014_MSB_CCIS53355328ST-4-0.NODE_19_146655	GUT_GENOME247414_2_5385	146655	Duplodnaviria;Heunggongvirae;Uroviricota;Caudoviricetes;Caudovirales	VOGdb markers	Methanobacteriota	Methanobacteria	Methanobacteriales	Methanobacteriaceae	Methanobrevibacter_A	Methanobrevibacter_A smithii	VC_357_1	No	NA	Not-determined	NA	0	France	0.0136555	Yes
Zeller_G_2014_MSB_CCIS53355328ST-4-0.NODE_31_110965	GUT_GENOME268434_7_1368	110965	Unassigned		Methanobacteriota	Methanobacteria	Methanobacteriales	Methanobacteriaceae	Methanobrevibacter_A	Methanobrevibacter_A smithii	VC_333_0	No	NA	Not-determined	NA	0	France	0.029937	No
Zeller_G_2014_MSB_CCIS53355328ST-4-0.NODE_4_266584	GUT_GENOME269219_18_19236	266584	Unassigned		Methanobacteriota	Methanobacteria	Methanobacteriales	Methanobacteriaceae	Methanobrevibacter_A	Methanobrevibacter_A smithii	VC_331_4	No	NA	Not-determined	NA	0	France	0.00367647	No
Zeller_G_2014_MSB_CCIS53355328ST-4-0.NODE_81_71058	GUT_GENOME253955_2_249842	71058	Duplodnaviria;Heunggongvirae;Uroviricota;Caudoviricetes;Caudovirales;Myoviridae	VOGdb markers	Methanobacteriota	Methanobacteria	Methanobacteriales	Methanobacteriaceae	Methanobrevibacter_A	Methanobrevibacter_A smithii	VC_328_0	No	NA	Not-determined	NA	0	France	0.0241597	No
Zeller_G_2014_MSB_CCIS53355328ST-4-0.NODE_9_205284	GUT_GENOME258086_2_60997	205284	Unassigned		Methanobacteriota	Methanobacteria	Methanobacteriales	Methanobacteriaceae	Methanobrevibacter_A	Methanobrevibacter_A smithii	VC_356_4	No	NA	Not-determined	NA	0	France	0.032563	No
Zeller_G_2014_MSB_CCIS53355328ST-4-0.NODE_91_67934	GUT_GENOME143185_16_1306	67934	Unassigned		Methanobacteriota	Methanobacteria	Methanobacteriales	Methanobacteriaceae	Methanobrevibacter_A	Methanobrevibacter_A smithii_A	Outlier	No	NA	Not-determined	NA	0	France	0.00315126	No
Zeller_G_2014_MSB_CCIS55230578ST-4-0.NODE_158_78705	GUT_GENOME282742_6_115569	78705	Unassigned		Methanobacteriota	Methanobacteria	Methanobacteriales	Methanobacteriaceae	Methanobrevibacter_A	Methanobrevibacter_A smithii	VC_334_0	No	NA	Not-determined	NA	0	France	0.00052521	Yes
Zeller_G_2014_MSB_CCIS55230578ST-4-0.NODE_166_77206	GUT_GENOME247693_325_79	77206	Unassigned		Methanobacteriota	Methanobacteria	Methanobacteriales	Methanobacteriaceae	Methanobrevibacter_A	Methanobrevibacter_A smithii	VC_331_3	No	NA	Not-determined	NA	0	France	0.0556723	No
Zeller_G_2014_MSB_CCIS55230578ST-4-0.NODE_174_74148	GUT_GENOME246782_8_58078	74148	Unassigned		Methanobacteriota	Methanobacteria	Methanobacteriales	Methanobacteriaceae	Methanobrevibacter_A	Methanobrevibacter_A smithii	Outlier	No	NA	Not-determined	NA	0	France	0.00157563	No
Zeller_G_2014_MSB_CCIS55230578ST-4-0.NODE_45_138567	GUT_GENOME269219_18_19236	138567	Unassigned		Methanobacteriota	Methanobacteria	Methanobacteriales	Methanobacteriaceae	Methanobrevibacter_A	Methanobrevibacter_A smithii	VC_331_11	No	NA	Not-determined	NA	0	France	0.00262605	No
Zeller_G_2014_MSB_CCIS55230578ST-4-0.NODE_58_125283	GUT_GENOME143185_16_1306	125283	Duplodnaviria;Heunggongvirae;Uroviricota;Caudoviricetes;Caudovirales	VOGdb markers	Methanobacteriota	Methanobacteria	Methanobacteriales	Methanobacteriaceae	Methanobrevibacter_A	Methanobrevibacter_A smithii_A	VC_329_9	No	NA	Not-determined	NA	0	France	0.0357143	No
Zeller_G_2014_MSB_CCIS55230578ST-4-0.NODE_7_257575	GUT_GENOME183496_95_544	257575	Duplodnaviria;Heunggongvirae;Uroviricota;Caudoviricetes;Caudovirales	VOGdb markers	Methanobacteriota	Methanobacteria	Methanobacteriales	Methanobacteriaceae	Methanobrevibacter_A	Methanobrevibacter_A smithii	VC_357_6	No	NA	Not-determined	NA	0	France	0.0241597	Yes
Zeller_G_2014_MSB_CCIS55230578ST-4-0.NODE_72_115846	GUT_GENOME261695_15_32706	115846	Duplodnaviria;Heunggongvirae;Uroviricota;Caudoviricetes;Caudovirales	VOGdb markers	Methanobacteriota	Methanobacteria	Methanobacteriales	Methanobacteriaceae	Methanobrevibacter_A	Methanobrevibacter_A smithii	VC_327_4	No	NA	Not-determined	NA	0	France	0.00105042	No
Zeller_G_2014_MSB_CCIS55230578ST-4-0.NODE_93_103211	GUT_GENOME263468_1_482597	103211	Duplodnaviria;Heunggongvirae;Uroviricota;Caudoviricetes;Caudovirales;Myoviridae	VOGdb markers	Methanobacteriota	Methanobacteria	Methanobacteriales	Methanobacteriaceae	Methanobrevibacter_A	Methanobrevibacter_A woesei	VC_328_0	No	NA	Not-determined	NA	0	France	0.0446429	No
Zeller_G_2014_MSB_CCIS58234805ST-4-0.NODE_117638_276	CCIS88317640ST-4-0.NODE_3341_8432	276	Unassigned		Methanobacteriota	Methanobacteria	Methanobacteriales	Methanobacteriaceae	Methanobrevibacter_A	Methanobrevibacter_A smithii	Singleton	No	NA	Low-quality	0.39	0	France	0.0131303	No
Zeller_G_2014_MSB_CCIS58234805ST-4-0.NODE_27347_635	GUT_GENOME134626_6_3293	635	Unassigned		Methanobacteriota	Methanobacteria	Methanobacteriales	Methanobacteriaceae	Methanobrevibacter_A	Methanobrevibacter_A smithii	Singleton	No	NA	Low-quality	0.35	0	France	0.00157563	Yes
Zeller_G_2014_MSB_CCIS58234805ST-4-0.NODE_31151_590	GUT_GENOME285439_1_131040	590	Unassigned		Methanobacteriota	Methanobacteria	Methanobacteriales	Methanobacteriaceae	Methanobrevibacter_A	Methanobrevibacter_A smithii	Singleton	No	NA	Low-quality	1.13	0	France	0.0183824	No
Zeller_G_2014_MSB_CCIS58234805ST-4-0.NODE_58398_413	CCIS33816588ST-4-0.NODE_150_69459	413	Unassigned		Methanobacteriota	Methanobacteria	Methanobacteriales	Methanobacteriaceae	Methanobrevibacter_A	Methanobrevibacter_A smithii	Singleton	No	NA	Low-quality	1.06	0	France	0.0173319	No
Zeller_G_2014_MSB_CCIS59132091ST-4-0.NODE_1192_21207	GUT_GENOME018608_1_36299	21207	Unassigned		Methanobacteriota	Methanobacteria	Methanobacteriales	Methanobacteriaceae	Methanobrevibacter_A	Methanobrevibacter_A smithii	VC_355_0	No	NA	Not-determined	NA	0	France	0.0241597	No
Zeller_G_2014_MSB_CCIS59132091ST-4-0.NODE_1219_20981	GUT_GENOME066320_3_57785	20981	Unassigned		Methanobacteriota	Methanobacteria	Methanobacteriales	Methanobacteriaceae	Methanobrevibacter_A	Methanobrevibacter_A smithii_A	Outlier	No	NA	Not-determined	NA	0	France	0.00052521	No
Zeller_G_2014_MSB_CCIS59132091ST-4-0.NODE_211_66031	GUT_GENOME096906_68_224	66031	Unassigned		Methanobacteriota	Methanobacteria	Methanobacteriales	Methanobacteriaceae	Methanobrevibacter_A	Methanobrevibacter_A smithii_A	Outlier	No	NA	Not-determined	NA	0	France	0.0283613	No
Zeller_G_2014_MSB_CCIS59132091ST-4-0.NODE_293_55100	GUT_GENOME183496_95_544	55100	Unassigned		Methanobacteriota	Methanobacteria	Methanobacteriales	Methanobacteriaceae	Methanobrevibacter_A	Methanobrevibacter_A smithii	Outlier	No	NA	Not-determined	NA	0	France	0.0246849	No
Zeller_G_2014_MSB_CCIS59132091ST-4-0.NODE_5791_6149	GUT_GENOME194277_1_110295	6149	Unassigned		Methanobacteriota	Methanobacteria	Methanobacteriales	Methanobacteriaceae	Methanobrevibacter_A	Methanobrevibacter_A smithii	Outlier	No	NA	Not-determined	NA	0	France	0.00052521	No
Zeller_G_2014_MSB_CCIS62605362ST-3-0.NODE_13_241033	GUT_GENOME246782_8_59663	241033	Unassigned		Methanobacteriota	Methanobacteria	Methanobacteriales	Methanobacteriaceae	Methanobrevibacter_A	Methanobrevibacter_A smithii	VC_331_14	No	NA	Not-determined	NA	0	France	0.0409664	No
Zeller_G_2014_MSB_CCIS62605362ST-3-0.NODE_142_91196	GUT_GENOME261695_15_32706	91196	Duplodnaviria;Heunggongvirae;Uroviricota;Caudoviricetes;Caudovirales	VOGdb markers	Methanobacteriota	Methanobacteria	Methanobacteriales	Methanobacteriaceae	Methanobrevibacter_A	Methanobrevibacter_A smithii	VC_327_4	No	NA	Not-determined	NA	0	France	0.0157563	No
Zeller_G_2014_MSB_CCIS62605362ST-3-0.NODE_18_195900	GUT_GENOME143185_16_1306	195900	Duplodnaviria;Heunggongvirae;Uroviricota;Caudoviricetes;Caudovirales	VOGdb markers	Methanobacteriota	Methanobacteria	Methanobacteriales	Methanobacteriaceae	Methanobrevibacter_A	Methanobrevibacter_A smithii_A	VC_329_9	No	NA	Not-determined	NA	0	France	0.019958	No
Zeller_G_2014_MSB_CCIS62605362ST-3-0.NODE_40_148205	GUT_GENOME247414_2_5385	148205	Duplodnaviria;Heunggongvirae;Uroviricota;Caudoviricetes;Caudovirales	VOGdb markers	Methanobacteriota	Methanobacteria	Methanobacteriales	Methanobacteriaceae	Methanobrevibacter_A	Methanobrevibacter_A smithii	VC_357_1	No	NA	Not-determined	NA	0	France	0.00210084	Yes
Zeller_G_2014_MSB_CCIS62605362ST-3-0.NODE_76_117777	GUT_GENOME143185_12_220085	117777	Unassigned		Methanobacteriota	Methanobacteria	Methanobacteriales	Methanobacteriaceae	Methanobrevibacter_A	Methanobrevibacter_A smithii_A	VC_334_0	No	NA	Medium-quality	62.58	0	France	0.0346639	Yes
Zeller_G_2014_MSB_CCIS62605362ST-3-0.NODE_9_262741	GUT_GENOME258086_2_60997	262741	Unassigned		Methanobacteriota	Methanobacteria	Methanobacteriales	Methanobacteriaceae	Methanobrevibacter_A	Methanobrevibacter_A smithii	VC_356_4	No	NA	Not-determined	NA	0	France	0.0420168	No
Zeller_G_2014_MSB_CCIS64773582ST-4-0.NODE_82_130408	GUT_GENOME247414_2_5385	130408	Duplodnaviria;Heunggongvirae;Uroviricota;Caudoviricetes;Caudovirales	VOGdb markers	Methanobacteriota	Methanobacteria	Methanobacteriales	Methanobacteriaceae	Methanobrevibacter_A	Methanobrevibacter_A smithii	VC_357_3	No	NA	Not-determined	NA	0	France	0.00052521	Yes
Zeller_G_2014_MSB_CCIS71578391ST-4-0.NODE_325_56924	GUT_GENOME093215_4_44917	56924	Unassigned		Methanobacteriota	Methanobacteria	Methanobacteriales	Methanobacteriaceae	Methanobrevibacter_A	Methanobrevibacter_A smithii	Outlier	No	NA	Not-determined	NA	0	France	0.0346639	No
Zeller_G_2014_MSB_CCIS71578391ST-4-0.NODE_442_45730	GUT_GENOME253955_2_249842	45730	Duplodnaviria;Heunggongvirae;Uroviricota;Caudoviricetes;Caudovirales;Myoviridae	VOGdb markers	Methanobacteriota	Methanobacteria	Methanobacteriales	Methanobacteriaceae	Methanobrevibacter_A	Methanobrevibacter_A smithii	VC_328_0	No	NA	Not-determined	NA	0	France	0.0252101	No
Zeller_G_2014_MSB_CCIS71578391ST-4-0.NODE_5605_5991	GUT_GENOME143185_16_1306	5991	Unassigned		Methanobacteriota	Methanobacteria	Methanobacteriales	Methanobacteriaceae	Methanobrevibacter_A	Methanobrevibacter_A smithii_A	VC_369_0	No	NA	Not-determined	NA	0	France	0.0189076	No
Zeller_G_2014_MSB_CCIS74726977ST-3-0.NODE_113_80872	GUT_GENOME093215_4_44917	80872	Unassigned		Methanobacteriota	Methanobacteria	Methanobacteriales	Methanobacteriaceae	Methanobrevibacter_A	Methanobrevibacter_A smithii	Outlier	No	NA	Not-determined	NA	0	France	0.0136555	No
Zeller_G_2014_MSB_CCIS74726977ST-3-0.NODE_1274_20590	GUT_GENOME011061_10_783	20590	Unassigned		Methanobacteriota	Methanobacteria	Methanobacteriales	Methanobacteriaceae	Methanobrevibacter_A	Methanobrevibacter_A smithii	VC_360_0	No	NA	Not-determined	NA	0	France	0.0267857	No
Zeller_G_2014_MSB_CCIS74726977ST-3-0.NODE_173_67143	GUT_GENOME282742_6_115569	67143	Unassigned		Methanobacteriota	Methanobacteria	Methanobacteriales	Methanobacteriaceae	Methanobrevibacter_A	Methanobrevibacter_A smithii	Outlier	No	NA	Not-determined	NA	0	France	0.00472689	No
Zeller_G_2014_MSB_CCIS74726977ST-3-0.NODE_193_64038	GUT_GENOME259830_2_112204	64038	Unassigned		Methanobacteriota	Methanobacteria	Methanobacteriales	Methanobacteriaceae	Methanobrevibacter_A	Methanobrevibacter_A smithii	Outlier	No	NA	Not-determined	NA	0	France	0.0477941	No
Zeller_G_2014_MSB_CCIS74726977ST-3-0.NODE_29_135184	GUT_GENOME258086_2_60997	135184	Unassigned		Methanobacteriota	Methanobacteria	Methanobacteriales	Methanobacteriaceae	Methanobrevibacter_A	Methanobrevibacter_A smithii	VC_356_2	No	NA	Not-determined	NA	0	France	0.0120798	No
Zeller_G_2014_MSB_CCIS74726977ST-3-0.NODE_35_129094	GUT_GENOME279910_4_62128	129094	Unassigned		Methanobacteriota	Methanobacteria	Methanobacteriales	Methanobacteriaceae	Methanobrevibacter_A	Methanobrevibacter_A smithii	VC_332_1	No	NA	Not-determined	NA	0	France	0.00262605	No
Zeller_G_2014_MSB_CCIS74726977ST-3-0.NODE_6_221594	GUT_GENOME246782_8_59663	221594	Unassigned		Methanobacteriota	Methanobacteria	Methanobacteriales	Methanobacteriaceae	Methanobrevibacter_A	Methanobrevibacter_A smithii	VC_331_13	No	NA	Not-determined	NA	0	France	0.0257353	No
Zeller_G_2014_MSB_CCIS74726977ST-3-0.NODE_7_219378	GUT_GENOME247414_2_5385	219378	Duplodnaviria;Heunggongvirae;Uroviricota;Caudoviricetes;Caudovirales	VOGdb markers	Methanobacteriota	Methanobacteria	Methanobacteriales	Methanobacteriaceae	Methanobrevibacter_A	Methanobrevibacter_A smithii	VC_357_6	No	NA	Not-determined	NA	0	France	0.0246849	Yes
Zeller_G_2014_MSB_CCIS76563044ST-4-0.NODE_300_40666	GUT_GENOME259830_2_112204	40666	Unassigned		Methanobacteriota	Methanobacteria	Methanobacteriales	Methanobacteriaceae	Methanobrevibacter_A	Methanobrevibacter_A smithii	Outlier	No	NA	Not-determined	NA	0	France	0.00157563	No
Zeller_G_2014_MSB_CCIS78318719ST-4-0.NODE_142345_445	GUT_GENOME259830_12_63770	445	Unassigned		Methanobacteriota	Methanobacteria	Methanobacteriales	Methanobacteriaceae	Methanobrevibacter_A	Methanobrevibacter_A smithii	Singleton	No	NA	Low-quality	0.87	0	France	0.0514706	No
Zeller_G_2014_MSB_CCIS78318719ST-4-0.NODE_3270_7548	GUT_GENOME018608_1_39351	7548	Unassigned		Methanobacteriota	Methanobacteria	Methanobacteriales	Methanobacteriaceae	Methanobrevibacter_A	Methanobrevibacter_A smithii	Singleton	No	NA	Not-determined	NA	0	France	0.00052521	No
Zeller_G_2014_MSB_CCIS78318719ST-4-0.NODE_43553_1048	GUT_GENOME072310_70_335	1048	Unassigned		Methanobacteriota	Methanobacteria	Methanobacteriales	Methanobacteriaceae	Methanobrevibacter_A	Methanobrevibacter_A smithii	Singleton	No	NA	Low-quality	1.97	0	France	0.0115546	Yes
Zeller_G_2014_MSB_CCIS78318719ST-4-0.NODE_48207_973	GUT_GENOME235230_27_63836	973	Unassigned		Methanobacteriota	Methanobacteria	Methanobacteriales	Methanobacteriaceae	Methanobrevibacter_A	Methanobrevibacter_A smithii	Singleton	No	NA	Not-determined	NA	0	France	0.0446429	No
Zeller_G_2014_MSB_CCIS78318719ST-4-0.NODE_72607_719	GUT_GENOME139679_31_15191	719	Unassigned		Methanobacteriota	Methanobacteria	Methanobacteriales	Methanobacteriaceae	Methanobrevibacter_A	Methanobrevibacter_A smithii_A	Singleton	No	NA	Low-quality	1.35	0	France	0.00735294	Yes
Zeller_G_2014_MSB_CCIS79210440ST-3-0.NODE_28_65973	ERR688593.NODE_1068_20580	65973	Unassigned		Methanobacteriota	Methanobacteria	Methanobacteriales	Methanobacteriaceae	Methanobrevibacter_A	Methanobrevibacter_A smithii_A	Outlier	No	NA	Not-determined	NA	0	France	0.00262605	No
Zeller_G_2014_MSB_CCIS79210440ST-3-0.NODE_69_43087	GUT_GENOME194277_1_110295	43087	Unassigned		Methanobacteriota	Methanobacteria	Methanobacteriales	Methanobacteriaceae	Methanobrevibacter_A	Methanobrevibacter_A smithii	Outlier	No	NA	Not-determined	NA	0	France	0.0141807	No
Zeller_G_2014_MSB_CCIS81710917ST-20-0.NODE_22_234312	GUT_GENOME258086_2_60997	234312	Unassigned		Methanobacteriota	Methanobacteria	Methanobacteriales	Methanobacteriaceae	Methanobrevibacter_A	Methanobrevibacter_A smithii	VC_356_4	No	NA	Not-determined	NA	0	France	0.0157563	No
Zeller_G_2014_MSB_CCIS81710917ST-20-0.NODE_249_79730	GUT_GENOME183496_95_544	79730	Unassigned		Methanobacteriota	Methanobacteria	Methanobacteriales	Methanobacteriaceae	Methanobrevibacter_A	Methanobrevibacter_A smithii	Outlier	No	NA	Medium-quality	73.8	0	France	0.0236345	No
Zeller_G_2014_MSB_CCIS81710917ST-20-0.NODE_37_197504	GUT_GENOME066320_3_57785	197504	Duplodnaviria;Heunggongvirae;Uroviricota;Caudoviricetes;Caudovirales	VOGdb markers	Methanobacteriota	Methanobacteria	Methanobacteriales	Methanobacteriaceae	Methanobrevibacter_A	Methanobrevibacter_A smithii_A	VC_357_4	No	NA	Not-determined	NA	0	France	0.00210084	Yes
Zeller_G_2014_MSB_CCIS81710917ST-20-0.NODE_42_192608	GUT_GENOME279910_4_62128	192608	Unassigned		Methanobacteriota	Methanobacteria	Methanobacteriales	Methanobacteriaceae	Methanobrevibacter_A	Methanobrevibacter_A smithii	VC_332_0	No	NA	Not-determined	NA	0	France	0.00997899	No
Zeller_G_2014_MSB_CCIS81710917ST-20-0.NODE_44_188331	GUT_GENOME020562_14_876	188331	Unassigned		Methanobacteriota	Methanobacteria	Methanobacteriales	Methanobacteriaceae	Methanobrevibacter_A	Methanobrevibacter_A smithii_A	VC_334_1	No	NA	Not-determined	NA	0	France	0.022584	Yes
Zeller_G_2014_MSB_CCIS81887263ST-4-0.NODE_101_129648	GUT_GENOME143185_12_220085	129648	Unassigned		Methanobacteriota	Methanobacteria	Methanobacteriales	Methanobacteriaceae	Methanobrevibacter_A	Methanobrevibacter_A smithii_A	VC_334_1	No	NA	Not-determined	NA	0	France	0.0173319	Yes
Zeller_G_2014_MSB_CCIS81887263ST-4-0.NODE_156_108835	GUT_GENOME194277_1_110295	108835	Unassigned		Methanobacteriota	Methanobacteria	Methanobacteriales	Methanobacteriaceae	Methanobrevibacter_A	Methanobrevibacter_A smithii	Outlier	No	NA	Not-determined	NA	0	France	0.0152311	No
Zeller_G_2014_MSB_CCIS81887263ST-4-0.NODE_159_107618	GUT_GENOME143185_16_1306	107618	Duplodnaviria;Heunggongvirae;Uroviricota;Caudoviricetes;Caudovirales	VOGdb markers	Methanobacteriota	Methanobacteria	Methanobacteriales	Methanobacteriaceae	Methanobrevibacter_A	Methanobrevibacter_A smithii_A	VC_329_9	No	NA	Not-determined	NA	0	France	0.0204832	No
Zeller_G_2014_MSB_CCIS81887263ST-4-0.NODE_269_78395	GUT_GENOME135949_10_18798	78395	Unassigned		Methanobacteriota	Methanobacteria	Methanobacteriales	Methanobacteriaceae	Methanobrevibacter_A	Methanobrevibacter_A smithii	Outlier	No	NA	Not-determined	NA	0	France	0.00052521	No
Zeller_G_2014_MSB_CCIS81887263ST-4-0.NODE_29_213517	GUT_GENOME261695_15_32706	213517	Duplodnaviria;Heunggongvirae;Uroviricota;Caudoviricetes;Caudovirales	VOGdb markers	Methanobacteriota	Methanobacteria	Methanobacteriales	Methanobacteriaceae	Methanobrevibacter_A	Methanobrevibacter_A smithii	VC_327_1	No	NA	Not-determined	NA	0	France	0.042542	No
Zeller_G_2014_MSB_CCIS81887263ST-4-0.NODE_37_201809	GUT_GENOME258086_2_60997	201809	Unassigned		Methanobacteriota	Methanobacteria	Methanobacteriales	Methanobacteriaceae	Methanobrevibacter_A	Methanobrevibacter_A smithii	VC_356_4	No	NA	Not-determined	NA	0	France	0.00420168	No
Zeller_G_2014_MSB_CCIS81887263ST-4-0.NODE_489_54829	GUT_GENOME282742_6_115569	54829	Unassigned		Methanobacteriota	Methanobacteria	Methanobacteriales	Methanobacteriaceae	Methanobrevibacter_A	Methanobrevibacter_A smithii	Outlier	No	NA	Not-determined	NA	0	France	0.00105042	No
Zeller_G_2014_MSB_CCIS81887263ST-4-0.NODE_60_171891	GUT_GENOME273630_6_81210	171891	Unassigned		Methanobacteriota	Methanobacteria	Methanobacteriales	Methanobacteriaceae	Methanobrevibacter_A	Methanobrevibacter_A smithii	Overlap (VC_333/VC_334)	No	NA	Not-determined	NA	0	France	0.022584	No
Zeller_G_2014_MSB_CCIS81887263ST-4-0.NODE_81_147051	GUT_GENOME246782_8_59663	147051	Unassigned		Methanobacteriota	Methanobacteria	Methanobacteriales	Methanobacteriaceae	Methanobrevibacter_A	Methanobrevibacter_A smithii	VC_331_12	No	NA	Not-determined	NA	0	France	0.00945378	No
Zeller_G_2014_MSB_CCIS84543192ST-4-0.NODE_244105_239	GUT_GENOME067949_4_135665	239	Unassigned		Methanobacteriota	Methanobacteria	Methanobacteriales	Methanobacteriaceae	Methanobrevibacter_A	Methanobrevibacter_A smithii	Singleton	No	NA	Not-determined	NA	0	France	0.0267857	No
Zeller_G_2014_MSB_CCIS87116798ST-4-0.NODE_1_338566	GUT_GENOME194277_1_110295	338566	Unassigned		Methanobacteriota	Methanobacteria	Methanobacteriales	Methanobacteriaceae	Methanobrevibacter_A	Methanobrevibacter_A smithii	VC_331_4	No	NA	Not-determined	NA	0	France	0.0309874	No
Zeller_G_2014_MSB_CCIS87116798ST-4-0.NODE_13_133442	GUT_GENOME143185_16_1306	133442	Duplodnaviria;Heunggongvirae;Uroviricota;Caudoviricetes;Caudovirales	VOGdb markers	Methanobacteriota	Methanobacteria	Methanobacteriales	Methanobacteriaceae	Methanobrevibacter_A	Methanobrevibacter_A smithii_A	VC_329_1	No	NA	High-quality	93.64	0	France	0.0131303	Yes
Zeller_G_2014_MSB_CCIS87116798ST-4-0.NODE_15_127861	GUT_GENOME134626_6_3293	127861	Duplodnaviria;Heunggongvirae;Uroviricota;Caudoviricetes;Caudovirales	VOGdb markers	Methanobacteriota	Methanobacteria	Methanobacteriales	Methanobacteriaceae	Methanobrevibacter_A	Methanobrevibacter_A smithii	VC_329_4	No	NA	Medium-quality	69.85	0	France	0.00262605	No
Zeller_G_2014_MSB_CCIS87116798ST-4-0.NODE_19_101742	ERR688624.NODE_1318_21	101742	Duplodnaviria;Heunggongvirae;Uroviricota;Caudoviricetes;Caudovirales;Myoviridae	VOGdb markers	Methanobacteriota	Methanobacteria	Methanobacteriales	Methanobacteriaceae	Methanobrevibacter_A	Methanobrevibacter_A smithii	VC_328_0	No	NA	Not-determined	NA	0	France	0.0278361	No
Zeller_G_2014_MSB_CCIS87116798ST-4-0.NODE_3_238066	GUT_GENOME247414_2_5385	238066	Duplodnaviria;Heunggongvirae;Uroviricota;Caudoviricetes;Caudovirales	VOGdb markers	Methanobacteriota	Methanobacteria	Methanobacteriales	Methanobacteriaceae	Methanobrevibacter_A	Methanobrevibacter_A smithii	VC_357_6	No	NA	Not-determined	NA	0	France	0.0441176	Yes
Zeller_G_2014_MSB_CCIS87116798ST-4-0.NODE_46_65438	GUT_GENOME279910_4_62128	65438	Unassigned		Methanobacteriota	Methanobacteria	Methanobacteriales	Methanobacteriaceae	Methanobrevibacter_A	Methanobrevibacter_A smithii	VC_332_1	No	NA	Not-determined	NA	0	France	0.0231092	No
Zeller_G_2014_MSB_CCIS87116798ST-4-0.NODE_7_178428	GUT_GENOME261695_15_32706	178428	Duplodnaviria;Heunggongvirae;Uroviricota;Caudoviricetes;Caudovirales	VOGdb markers	Methanobacteriota	Methanobacteria	Methanobacteriales	Methanobacteriaceae	Methanobrevibacter_A	Methanobrevibacter_A smithii	VC_327_2	No	NA	Not-determined	NA	0	France	0.0215336	No
Zeller_G_2014_MSB_CCIS87116798ST-4-0.NODE_98_46439	GUT_GENOME263468_1_482597	46439	Unassigned		Methanobacteriota	Methanobacteria	Methanobacteriales	Methanobacteriaceae	Methanobrevibacter_A	Methanobrevibacter_A woesei	VC_362_0	No	NA	Not-determined	NA	0	France	0.00367647	No
Zeller_G_2014_MSB_CCIS87167916ST-4-0.NODE_114927_325	CCIS33816588ST-4-0.NODE_150_66736	325	Unassigned		Methanobacteriota	Methanobacteria	Methanobacteriales	Methanobacteriaceae	Methanobrevibacter_A	Methanobrevibacter_A smithii	Singleton	No	NA	Low-quality	0.61	0	France	0.0346639	No
Zeller_G_2014_MSB_CCIS88317640ST-4-0.NODE_1567_20162	GUT_GENOME018608_1_36299	20162	Unassigned		Methanobacteriota	Methanobacteria	Methanobacteriales	Methanobacteriaceae	Methanobrevibacter_A	Methanobrevibacter_A smithii	VC_355_0	No	NA	Not-determined	NA	0	France	0.0351891	No
Zeller_G_2014_MSB_CCIS88317640ST-4-0.NODE_263_68521	GUT_GENOME284814_21_16225	68521	Unassigned		Methanobacteriota	Methanobacteria	Methanobacteriales	Methanobacteriaceae	Methanobrevibacter_A	Methanobrevibacter_A smithii_A	VC_333_0	No	NA	Not-determined	NA	0	France	0.00052521	No
Zeller_G_2014_MSB_CCIS88317640ST-4-0.NODE_595_41410	GUT_GENOME060185_13_536	41410	Unassigned		Methanobacteriota	Methanobacteria	Methanobacteriales	Methanobacteriaceae	Methanobrevibacter_A	Methanobrevibacter_A smithii	Outlier	No	NA	Not-determined	NA	0	France	0.0241597	No
Zeller_G_2014_MSB_CCIS88317640ST-4-0.NODE_915_30944	GUT_GENOME279910_4_62128	30944	Unassigned		Methanobacteriota	Methanobacteria	Methanobacteriales	Methanobacteriaceae	Methanobrevibacter_A	Methanobrevibacter_A smithii	Outlier	No	NA	Not-determined	NA	0	France	0.0210084	No
Zeller_G_2014_MSB_CCIS88317640ST-4-0.NODE_946_30323	GUT_GENOME183496_95_544	30323	Unassigned		Methanobacteriota	Methanobacteria	Methanobacteriales	Methanobacteriaceae	Methanobrevibacter_A	Methanobrevibacter_A smithii	Outlier	No	NA	Not-determined	NA	0	France	0.0105042	No
Zeller_G_2014_MSB_CCIS90164298ST-4-0.NODE_106_94876	GUT_GENOME194277_1_111100	94876	Unassigned		Methanobacteriota	Methanobacteria	Methanobacteriales	Methanobacteriaceae	Methanobrevibacter_A	Methanobrevibacter_A smithii	Outlier	No	NA	Not-determined	NA	0	France	0.0262605	No
Zeller_G_2014_MSB_CCIS90164298ST-4-0.NODE_1386_19474	GUT_GENOME194277_1_110295	19474	Unassigned		Methanobacteriota	Methanobacteria	Methanobacteriales	Methanobacteriaceae	Methanobrevibacter_A	Methanobrevibacter_A smithii	Outlier	No	NA	Not-determined	NA	0	France	0.0257353	No
Zeller_G_2014_MSB_CCIS90164298ST-4-0.NODE_1553_17856	GUT_GENOME020562_14_437	17856	Unassigned		Methanobacteriota	Methanobacteria	Methanobacteriales	Methanobacteriaceae	Methanobrevibacter_A	Methanobrevibacter_A smithii_A	Outlier	No	NA	Not-determined	NA	0	France	0.0178571	No
Zeller_G_2014_MSB_CCIS90164298ST-4-0.NODE_3969_8535	GUT_GENOME283261_25_13131	8535	Unassigned		Methanobacteriota	Methanobacteria	Methanobacteriales	Methanobacteriaceae	Methanobrevibacter_A	Methanobrevibacter_A smithii	Outlier	No	NA	Low-quality	6.66	0	France	0.00315126	No
Zeller_G_2014_MSB_CCIS90164298ST-4-0.NODE_45_141294	GUT_GENOME258086_2_60997	141294	Unassigned		Methanobacteriota	Methanobacteria	Methanobacteriales	Methanobacteriaceae	Methanobrevibacter_A	Methanobrevibacter_A smithii	VC_356_2	No	NA	Not-determined	NA	0	France	0.0546218	No
Zeller_G_2014_MSB_CCIS94417875ST-3-0.NODE_11_127462	GUT_GENOME143185_12_220085	127462	Unassigned		Methanobacteriota	Methanobacteria	Methanobacteriales	Methanobacteriaceae	Methanobrevibacter_A	Methanobrevibacter_A smithii_A	VC_334_1	No	NA	Medium-quality	67.72	0	France	0.0136555	Yes
Zeller_G_2014_MSB_CCIS94417875ST-3-0.NODE_18665_1255	GUT_GENOME273630_6_80982	1255	Unassigned		Methanobacteriota	Methanobacteria	Methanobacteriales	Methanobacteriaceae	Methanobrevibacter_A	Methanobrevibacter_A smithii	Singleton	No	NA	Not-determined	NA	0	France	0.0115546	Yes
Zeller_G_2014_MSB_CCIS94417875ST-3-0.NODE_237_26578	GUT_GENOME143185_12_220521	26578	Unassigned		Methanobacteriota	Methanobacteria	Methanobacteriales	Methanobacteriaceae	Methanobrevibacter_A	Methanobrevibacter_A smithii_A	Outlier	No	NA	Not-determined	NA	0	France	0.019958	No
Zeller_G_2014_MSB_CCIS94417875ST-3-0.NODE_26_93690	GUT_GENOME279910_4_62128	93690	Unassigned		Methanobacteriota	Methanobacteria	Methanobacteriales	Methanobacteriaceae	Methanobrevibacter_A	Methanobrevibacter_A smithii	VC_332_1	No	NA	Not-determined	NA	0	France	0.0215336	No
Zeller_G_2014_MSB_CCIS94417875ST-3-0.NODE_38_79065	ERR688624.NODE_1318_21	79065	Duplodnaviria;Heunggongvirae;Uroviricota;Caudoviricetes;Caudovirales;Myoviridae	VOGdb markers	Methanobacteriota	Methanobacteria	Methanobacteriales	Methanobacteriaceae	Methanobrevibacter_A	Methanobrevibacter_A smithii	VC_328_0	No	NA	Not-determined	NA	0	France	0.00945378	No
Zeller_G_2014_MSB_CCIS94417875ST-3-0.NODE_53_67248	GUT_GENOME247693_325_79	67248	Unassigned		Methanobacteriota	Methanobacteria	Methanobacteriales	Methanobacteriaceae	Methanobrevibacter_A	Methanobrevibacter_A smithii	VC_331_3	No	NA	Not-determined	NA	0	France	0.0204832	No
Zeller_G_2014_MSB_CCIS94417875ST-3-0.NODE_58_65638	GUT_GENOME282742_6_115569	65638	Unassigned		Methanobacteriota	Methanobacteria	Methanobacteriales	Methanobacteriaceae	Methanobrevibacter_A	Methanobrevibacter_A smithii	Outlier	No	NA	Not-determined	NA	0	France	0.00105042	No
Zeller_G_2014_MSB_CCIS94417875ST-3-0.NODE_7_139047	GUT_GENOME258086_2_60997	139047	Unassigned		Methanobacteriota	Methanobacteria	Methanobacteriales	Methanobacteriaceae	Methanobrevibacter_A	Methanobrevibacter_A smithii	VC_356_2	No	NA	Not-determined	NA	0	France	0.00157563	No
Zeller_G_2014_MSB_CCIS95409808ST-4-0.NODE_103_111920	GUT_GENOME259830_2_112204	111920	Unassigned		Methanobacteriota	Methanobacteria	Methanobacteriales	Methanobacteriaceae	Methanobrevibacter_A	Methanobrevibacter_A smithii	Outlier	No	NA	Not-determined	NA	0	France	0.0309874	No
Zeller_G_2014_MSB_CCIS95409808ST-4-0.NODE_28_216187	GUT_GENOME247414_2_5385	216187	Duplodnaviria;Heunggongvirae;Uroviricota;Caudoviricetes;Caudovirales	VOGdb markers	Methanobacteriota	Methanobacteria	Methanobacteriales	Methanobacteriaceae	Methanobrevibacter_A	Methanobrevibacter_A smithii	VC_357_6	No	NA	Not-determined	NA	0	France	0.0246849	Yes
Zeller_G_2014_MSB_CCIS95409808ST-4-0.NODE_6_358434	GUT_GENOME258086_2_60997	358434	Unassigned		Methanobacteriota	Methanobacteria	Methanobacteriales	Methanobacteriaceae	Methanobrevibacter_A	Methanobrevibacter_A smithii	VC_356_1	No	NA	Not-determined	NA	0	France	0.0278361	No
Zeller_G_2014_MSB_CCIS95409808ST-4-0.NODE_8_330241	GUT_GENOME194277_1_110295	330241	Unassigned		Methanobacteriota	Methanobacteria	Methanobacteriales	Methanobacteriaceae	Methanobrevibacter_A	Methanobrevibacter_A smithii	VC_331_4	No	NA	Not-determined	NA	0	France	0.029937	No
Zeller_G_2014_MSB_CCIS95409808ST-4-0.NODE_938_27674	GUT_GENOME263468_1_482597	27674	Unassigned		Methanobacteriota	Methanobacteria	Methanobacteriales	Methanobacteriaceae	Methanobrevibacter_A	Methanobrevibacter_A woesei	Outlier	No	NA	Low-quality	25.61	0	France	0.00052521	No
Zeller_G_2014_MSB_CCIS98512455ST-4-0.NODE_110010_391	ERR688627.NODE_870_20209	391	Unassigned		Methanobacteriota	Methanobacteria	Methanobacteriales	Methanobacteriaceae	Methanobrevibacter_A	Methanobrevibacter_A smithii	VC_510_0	No	NA	Not-determined	NA	0	France	0	No
Zeller_G_2014_MSB_CCIS98832363ST-4-0.NODE_493_40529	CCIS98832363ST-4-0.NODE_4878_217	40529	Unassigned		Methanobacteriota	Methanobacteria	Methanobacteriales	Methanobacteriaceae	Methanobrevibacter_C	Methanobrevibacter_C arboriphilus_A	Outlier	No	NA	Low-quality	27.92	0	France	0.0194328	Yes
Zeller_G_2014_MSB_CCMD14479708ST-21-0.NODE_23249_1480	GUT_GENOME265776_7_72442	1480	Unassigned		Methanobacteriota	Methanobacteria	Methanobacteriales	Methanobacteriaceae	Methanobrevibacter_A	Methanobrevibacter_A smithii	VC_393_0	No	NA	Not-determined	NA	0	Germany	0.0252101	No
Zeller_G_2014_MSB_CCMD14479708ST-21-0.NODE_32664_1061	GUT_GENOME134705_1_174422	1061	Unassigned		Methanobacteriota	Methanobacteria	Methanobacteriales	Methanobacteriaceae	Methanobrevibacter_A	Methanobrevibacter_A smithii	Singleton	No	NA	Low-quality	2.79	0	Germany	0.019958	No
Zeller_G_2014_MSB_CCMD14479708ST-21-0.NODE_63193_554	GUT_GENOME273866_45_728	554	Unassigned		Methanobacteriota	Methanobacteria	Methanobacteriales	Methanobacteriaceae	Methanobrevibacter_A	Methanobrevibacter_A smithii	Singleton	No	NA	Low-quality	1.44	0	Germany	0.0572479	No
Zeller_G_2014_MSB_CCMD23101338ST-21-0.NODE_30388_1658	GUT_GENOME094686_20_30333	1658	Unassigned		Methanobacteriota	Methanobacteria	Methanobacteriales	Methanobacteriaceae	Methanobrevibacter_A	Methanobrevibacter_A smithii_A	Singleton	No	NA	Low-quality	2.99	0	Germany	0	No
Zeller_G_2014_MSB_CCMD25963797ST-21-0.NODE_10598_2988	GUT_GENOME170506_22_31365	2988	Unassigned		Methanobacteriota	Methanobacteria	Methanobacteriales	Methanobacteriaceae	Methanobrevibacter_A	Methanobrevibacter_A smithii_A	Outlier	No	NA	Not-determined	NA	0	Germany	0.0194328	No
Zeller_G_2014_MSB_CCMD25963797ST-21-0.NODE_2639_12624	GUT_GENOME018608_1_36299	12624	Unassigned		Methanobacteriota	Methanobacteria	Methanobacteriales	Methanobacteriaceae	Methanobrevibacter_A	Methanobrevibacter_A smithii	VC_354_0	No	NA	Not-determined	NA	0	Germany	0.0173319	No
Zeller_G_2014_MSB_CCMD25963797ST-21-0.NODE_3749_8612	GUT_GENOME265514_19_8607	8612	Unassigned		Methanobacteriota	Methanobacteria	Methanobacteriales	Methanobacteriaceae	Methanobrevibacter_A	Methanobrevibacter_A smithii	Outlier	No	NA	Not-determined	NA	0	Germany	0	No
Zeller_G_2014_MSB_CCMD25963797ST-21-0.NODE_719_42272	GUT_GENOME135949_10_18798	42272	Unassigned		Methanobacteriota	Methanobacteria	Methanobacteriales	Methanobacteriaceae	Methanobrevibacter_A	Methanobrevibacter_A smithii	Outlier	No	NA	Not-determined	NA	0	Germany	0	No
Zeller_G_2014_MSB_CCMD42428553ST-21-0.NODE_15224_3087	GUT_GENOME267347_28_16442	3087	Unassigned		Methanobacteriota	Methanobacteria	Methanobacteriales	Methanobacteriaceae	Methanobrevibacter_A	Methanobrevibacter_A smithii_A	Outlier	No	NA	Low-quality	7.77	0	Germany	0.0204832	Yes
Zeller_G_2014_MSB_CCMD42428553ST-21-0.NODE_34129_1636	GUT_GENOME066503_35_392	1636	Unassigned		Methanobacteriota	Methanobacteria	Methanobacteriales	Methanobacteriaceae	Methanobrevibacter_A	Methanobrevibacter_A smithii	Singleton	No	NA	Low-quality	3.08	0	Germany	0.0220588	Yes
Zeller_G_2014_MSB_CCMD42428553ST-21-0.NODE_34605_1618	GUT_GENOME251961_3_308982	1618	Unassigned		Methanobacteriota	Methanobacteria	Methanobacteriales	Methanobacteriaceae	Methanobrevibacter_A	Methanobrevibacter_A smithii	Outlier	No	NA	Low-quality	2.92	0	Germany	0.0283613	Yes
Zeller_G_2014_MSB_CCMD45988061ST-21-0.NODE_170930_256	GUT_GENOME126110_35_13925	256	Unassigned		Methanobacteriota	Methanobacteria	Methanobacteriales	Methanobacteriaceae	Methanobrevibacter_A	Methanobrevibacter_A smithii	Singleton	No	NA	Not-determined	NA	0	Germany	0.00105042	No
Zeller_G_2014_MSB_CCMD45988061ST-21-0.NODE_24553_1491	GUT_GENOME239116_70_11174	1491	Unassigned		Methanobacteriota	Methanobacteria	Methanobacteriales	Methanobacteriaceae	Methanobrevibacter_A	Methanobrevibacter_A smithii_A	VC_394_0	No	NA	Low-quality	3.72	0	Germany	0.00052521	Yes
Zeller_G_2014_MSB_CCMD86114146ST-21-0.NODE_1230_21651	GUT_GENOME018608_1_36299	21651	Unassigned		Methanobacteriota	Methanobacteria	Methanobacteriales	Methanobacteriaceae	Methanobrevibacter_A	Methanobrevibacter_A smithii	VC_355_0	No	NA	Not-determined	NA	0	Germany	0.00367647	No
Zeller_G_2014_MSB_CCMD86114146ST-21-0.NODE_214_65921	GUT_GENOME253955_2_249842	65921	Duplodnaviria;Heunggongvirae;Uroviricota;Caudoviricetes;Caudovirales;Myoviridae	VOGdb markers	Methanobacteriota	Methanobacteria	Methanobacteriales	Methanobacteriaceae	Methanobrevibacter_A	Methanobrevibacter_A smithii	VC_328_0	No	NA	Not-determined	NA	0	Germany	0.0194328	No
Zeller_G_2014_MSB_CCMD86114146ST-21-0.NODE_393_46347	GUT_GENOME194277_1_110295	46347	Unassigned		Methanobacteriota	Methanobacteria	Methanobacteriales	Methanobacteriaceae	Methanobrevibacter_A	Methanobrevibacter_A smithii	Outlier	No	NA	Not-determined	NA	0	Germany	0.00157563	No
Zeller_G_2014_MSB_CCMD87156761ST-21-0.NODE_6374_5438	GUT_GENOME135949_10_18798	5438	Unassigned		Methanobacteriota	Methanobacteria	Methanobacteriales	Methanobacteriaceae	Methanobrevibacter_A	Methanobrevibacter_A smithii	VC_363_0	No	NA	Not-determined	NA	0	Germany	0.0252101	No
Zhang_X_2015_NM_ERR589443.NODE_8320_3766	GUT_GENOME194277_1_110295	3766	Unassigned		Methanobacteriota	Methanobacteria	Methanobacteriales	Methanobacteriaceae	Methanobrevibacter_A	Methanobrevibacter_A smithii	Outlier	No	NA	Not-determined	NA	0	China	0.0220588	No
Zhang_X_2015_NM_ERR589510.NODE_1061_19125	GUT_GENOME018608_1_36299	19125	Unassigned		Methanobacteriota	Methanobacteria	Methanobacteriales	Methanobacteriaceae	Methanobrevibacter_A	Methanobrevibacter_A smithii	VC_355_0	No	NA	Not-determined	NA	0	China	0.0262605	No
Zhang_X_2015_NM_ERR589543.NODE_110_84305	GUT_GENOME018608_1_36299	84305	Unassigned		Methanobacteriota	Methanobacteria	Methanobacteriales	Methanobacteriaceae	Methanobrevibacter_A	Methanobrevibacter_A smithii	Outlier	No	NA	Not-determined	NA	0	China	0.0210084	No
Zhang_X_2015_NM_ERR589543.NODE_147_71942	GUT_GENOME268434_7_1368	71942	Unassigned		Methanobacteriota	Methanobacteria	Methanobacteriales	Methanobacteriaceae	Methanobrevibacter_A	Methanobrevibacter_A smithii	VC_333_0	No	NA	Not-determined	NA	0	China	0.00052521	No
Zhang_X_2015_NM_ERR589543.NODE_17_202124	GUT_GENOME246782_8_59663	202124	Unassigned		Methanobacteriota	Methanobacteria	Methanobacteriales	Methanobacteriaceae	Methanobrevibacter_A	Methanobrevibacter_A smithii	VC_331_13	No	NA	Not-determined	NA	0	China	0.0178571	No
Zhang_X_2015_NM_ERR589543.NODE_19984_2370	CCIS38765456ST-20-0.NODE_125_97436	2370	Unassigned		Methanobacteriota	Methanobacteria	Methanobacteriales	Methanobacteriaceae	Methanobrevibacter_A	Methanobrevibacter_A smithii	Singleton	No	NA	Low-quality	5.91	0	China	0.00105042	No
Zhang_X_2015_NM_ERR589543.NODE_243_55321	GUT_GENOME093215_4_44917	55321	Unassigned		Methanobacteriota	Methanobacteria	Methanobacteriales	Methanobacteriaceae	Methanobrevibacter_A	Methanobrevibacter_A smithii	Outlier	No	NA	Not-determined	NA	0	China	0.00630252	No
Zhang_X_2015_NM_ERR589543.NODE_414_40116	ERR710432.NODE_943_6498	40116	Duplodnaviria;Heunggongvirae;Uroviricota;Caudoviricetes;Caudovirales;Siphoviridae	Viral database	Methanobacteriota	Methanobacteria	Methanobacteriales	Methanobacteriaceae	Methanobrevibacter	Methanobrevibacter olleyae	VC_326_0	No	NA	High-quality	100	0	China	0.0283613	Yes
Zhang_X_2015_NM_ERR589543.NODE_42_143022	GUT_GENOME258086_2_60997	143022	Unassigned		Methanobacteriota	Methanobacteria	Methanobacteriales	Methanobacteriaceae	Methanobrevibacter_A	Methanobrevibacter_A smithii	VC_356_2	No	NA	Not-determined	NA	0	China	0.0194328	No
Zhang_X_2015_NM_ERR589543.NODE_6271_5568	GUT_GENOME265602_1_80223	5568	Unassigned		Methanobacteriota	Methanobacteria	Methanobacteriales	Methanobacteriaceae	Methanobrevibacter_A	Methanobrevibacter_A smithii	Outlier	No	NA	Low-quality	14.64	0	China	0.0168067	Yes
Zhang_X_2015_NM_ERR589561.NODE_30715_1433	GUT_GENOME105435_8_56015	1433	Unassigned		Methanobacteriota	Methanobacteria	Methanobacteriales	Methanobacteriaceae	Methanobrevibacter_A	Methanobrevibacter_A smithii	VC_384_0	No	NA	Low-quality	3.65	0	China	0.00157563	No
Zhang_X_2015_NM_ERR589740.NODE_10145_4318	GUT_GENOME283261_25_16483	4318	Unassigned		Methanobacteriota	Methanobacteria	Methanobacteriales	Methanobacteriaceae	Methanobrevibacter_A	Methanobrevibacter_A smithii	Outlier	No	NA	Low-quality	7.92	0	China	0	Yes
Zhang_X_2015_NM_ERR589740.NODE_2178_18326	GUT_GENOME246782_8_58078	18326	Unassigned		Methanobacteriota	Methanobacteria	Methanobacteriales	Methanobacteriaceae	Methanobrevibacter_A	Methanobrevibacter_A smithii	Outlier	No	NA	Low-quality	10.63	0	China	0.00210084	No
Zhang_X_2015_NM_ERR589769.NODE_1_539700	GUT_GENOME279910_4_62128	539700	Unassigned		Methanobacteriota	Methanobacteria	Methanobacteriales	Methanobacteriaceae	Methanobrevibacter_A	Methanobrevibacter_A smithii	VC_331_6	No	NA	Not-determined	NA	0	China	0.00052521	No
Zhang_X_2015_NM_ERR589769.NODE_2_516798	GUT_GENOME247414_2_5385	516798	Duplodnaviria;Heunggongvirae;Uroviricota;Caudoviricetes;Caudovirales	VOGdb markers	Methanobacteriota	Methanobacteria	Methanobacteriales	Methanobacteriaceae	Methanobrevibacter_A	Methanobrevibacter_A smithii	Overlap (VC_357/VC_358)	No	NA	High-quality	100	0	China	0.0913866	Yes
Zhang_X_2015_NM_ERR589769.NODE_358_69717	GUT_GENOME143185_16_1306	69717	Unassigned		Methanobacteriota	Methanobacteria	Methanobacteriales	Methanobacteriaceae	Methanobrevibacter_A	Methanobrevibacter_A smithii_A	Outlier	No	NA	Not-determined	NA	0	China	0.0220588	No
Zhang_X_2015_NM_ERR589769.NODE_557_52831	GUT_GENOME017725_75_4520	52831	Unassigned		Thermoplasmatota	Thermoplasmata	Methanomassiliicoccales	Methanomethylophilaceae	UBA71	Unassigned	Outlier	No	NA	Not-determined	NA	0	China	0.0220588	No
Zhang_X_2015_NM_ERR589769.NODE_64_188512	GUT_GENOME261695_15_32706	188512	Duplodnaviria;Heunggongvirae;Uroviricota;Caudoviricetes;Caudovirales	VOGdb markers	Methanobacteriota	Methanobacteria	Methanobacteriales	Methanobacteriaceae	Methanobrevibacter_A	Methanobrevibacter_A smithii	VC_327_0	No	NA	Not-determined	NA	0	China	0.0236345	No
Zhang_X_2015_NM_ERR589775.NODE_177_85646	GUT_GENOME268434_7_1368	85646	Unassigned		Methanobacteriota	Methanobacteria	Methanobacteriales	Methanobacteriaceae	Methanobrevibacter_A	Methanobrevibacter_A smithii	VC_333_0	No	NA	Not-determined	NA	0	China	0.0414916	No
Zhang_X_2015_NM_ERR589775.NODE_251_70885	GUT_GENOME261695_15_32706	70885	Duplodnaviria;Heunggongvirae;Uroviricota;Caudoviricetes;Caudovirales	VOGdb markers	Methanobacteriota	Methanobacteria	Methanobacteriales	Methanobacteriaceae	Methanobrevibacter_A	Methanobrevibacter_A smithii	VC_327_4	No	NA	Not-determined	NA	0	China	0.00052521	No
Zhang_X_2015_NM_ERR589775.NODE_74_136789	GUT_GENOME284634_22_10926	136789	Duplodnaviria;Heunggongvirae;Uroviricota;Caudoviricetes;Caudovirales	VOGdb markers	Methanobacteriota	Methanobacteria	Methanobacteriales	Methanobacteriaceae	Methanobrevibacter_A	Methanobrevibacter_A smithii	VC_357_4	No	NA	Not-determined	NA	0	China	0.00105042	Yes
Zhang_X_2015_NM_ERR589790.NODE_108_115088	GUT_GENOME143185_16_1306	115088	Duplodnaviria;Heunggongvirae;Uroviricota;Caudoviricetes;Caudovirales	VOGdb markers	Methanobacteriota	Methanobacteria	Methanobacteriales	Methanobacteriaceae	Methanobrevibacter_A	Methanobrevibacter_A smithii_A	VC_329_9	No	NA	Not-determined	NA	0	China	0.00105042	No
Zhang_X_2015_NM_ERR589790.NODE_351_50536	GUT_GENOME251364_2_119053	50536	Unassigned		Methanobacteriota	Methanobacteria	Methanobacteriales	Methanobacteriaceae	Methanobrevibacter_A	Methanobrevibacter_A smithii_A	Outlier	No	NA	Not-determined	NA	0	China	0.00367647	No
Zhang_X_2015_NM_ERR589790.NODE_37_204913	GUT_GENOME258086_2_60997	204913	Unassigned		Methanobacteriota	Methanobacteria	Methanobacteriales	Methanobacteriaceae	Methanobrevibacter_A	Methanobrevibacter_A smithii	VC_356_4	No	NA	Not-determined	NA	0	China	0.00157563	No
Zhang_X_2015_NM_ERR589790.NODE_373_48469	ERR688624.NODE_1318_21	48469	Unassigned		Methanobacteriota	Methanobacteria	Methanobacteriales	Methanobacteriaceae	Methanobrevibacter_A	Methanobrevibacter_A smithii	Outlier	No	NA	Not-determined	NA	0	China	0.00052521	No
Zhang_X_2015_NM_ERR589813.NODE_3_527517	GUT_GENOME247414_2_5385	527517	Duplodnaviria;Heunggongvirae;Uroviricota;Caudoviricetes;Caudovirales	VOGdb markers	Methanobacteriota	Methanobacteria	Methanobacteriales	Methanobacteriaceae	Methanobrevibacter_A	Methanobrevibacter_A smithii	Overlap (VC_357/VC_358)	No	NA	High-quality	100	0	China	0.0315126	Yes
Zhang_X_2015_NM_ERR589826.NODE_108_95751	GUT_GENOME250989_1_407944	95751	Duplodnaviria;Heunggongvirae;Uroviricota;Caudoviricetes;Caudovirales	VOGdb markers	Methanobacteriota	Methanobacteria	Methanobacteriales	Methanobacteriaceae	Methanobrevibacter_A	Methanobrevibacter_A smithii	VC_357_2	No	NA	Not-determined	NA	0	China	0.00210084	No
Zhang_X_2015_NM_ERR589826.NODE_110_95206	GUT_GENOME143185_16_1306	95206	Duplodnaviria;Heunggongvirae;Uroviricota;Caudoviricetes;Caudovirales	VOGdb markers	Methanobacteriota	Methanobacteria	Methanobacteriales	Methanobacteriaceae	Methanobrevibacter_A	Methanobrevibacter_A smithii_A	VC_329_5	No	NA	Not-determined	NA	0	China	0.0535714	No
Zhang_X_2015_NM_ERR589826.NODE_12_242177	GUT_GENOME258086_2_60997	242177	Unassigned		Methanobacteriota	Methanobacteria	Methanobacteriales	Methanobacteriaceae	Methanobrevibacter_A	Methanobrevibacter_A smithii	VC_356_4	No	NA	Not-determined	NA	0	China	0.0257353	No
Zhang_X_2015_NM_ERR589826.NODE_13_235790	GUT_GENOME194277_1_110295	235790	Unassigned		Methanobacteriota	Methanobacteria	Methanobacteriales	Methanobacteriaceae	Methanobrevibacter_A	Methanobrevibacter_A smithii	VC_331_15	No	NA	Not-determined	NA	0	China	0.0367647	No
Zhang_X_2015_NM_ERR589826.NODE_434_48004	GUT_GENOME246782_8_60188	48004	Unassigned		Methanobacteriota	Methanobacteria	Methanobacteriales	Methanobacteriaceae	Methanobrevibacter_A	Methanobrevibacter_A smithii	Outlier	No	NA	Not-determined	NA	0	China	0.00630252	No
Zhang_X_2015_NM_ERR589826.NODE_528_42671	GUT_GENOME018608_1_39351	42671	Unassigned		Methanobacteriota	Methanobacteria	Methanobacteriales	Methanobacteriaceae	Methanobrevibacter_A	Methanobrevibacter_A smithii	Outlier	No	NA	Not-determined	NA	0	China	0.00262605	No
Zhang_X_2015_NM_ERR589826.NODE_809_32070	GUT_GENOME259830_2_112204	32070	Unassigned		Methanobacteriota	Methanobacteria	Methanobacteriales	Methanobacteriaceae	Methanobrevibacter_A	Methanobrevibacter_A smithii	Outlier	No	NA	Low-quality	18.61	0	China	0.0267857	No
Zhang_X_2015_NM_ERR589843.NODE_806_35320	GUT_GENOME066320_3_57639	35320	Unassigned		Methanobacteriota	Methanobacteria	Methanobacteriales	Methanobacteriaceae	Methanobrevibacter_A	Methanobrevibacter_A smithii_A	Outlier	No	NA	Not-determined	NA	0	China	0.0336134	No
Zhang_X_2015_NM_ERR589843.NODE_899_32393	GUT_GENOME143185_16_1306	32393	Unassigned		Methanobacteriota	Methanobacteria	Methanobacteriales	Methanobacteriaceae	Methanobrevibacter_A	Methanobrevibacter_A smithii_A	VC_360_0	No	NA	Not-determined	NA	0	China	0.0120798	No
Zhang_X_2015_NM_ERR589844.NODE_1519_19115	GUT_GENOME282742_6_115569	19115	Unassigned		Methanobacteriota	Methanobacteria	Methanobacteriales	Methanobacteriaceae	Methanobrevibacter_A	Methanobrevibacter_A smithii	Outlier	No	NA	Not-determined	NA	0	China	0.00105042	No
Zhang_X_2015_NM_ERR589859.NODE_28979_1851	GUT_GENOME246782_8_58078	1851	Unassigned		Methanobacteriota	Methanobacteria	Methanobacteriales	Methanobacteriaceae	Methanobrevibacter_A	Methanobrevibacter_A smithii	VC_375_0	No	NA	Low-quality	4.72	0	China	0.00105042	No
Zhang_X_2015_NM_ERR589874.NODE_1_560083	GUT_GENOME194277_1_110295	560083	Unassigned		Methanobacteriota	Methanobacteria	Methanobacteriales	Methanobacteriaceae	Methanobrevibacter_A	Methanobrevibacter_A smithii	VC_331_0	No	NA	High-quality	100	0	China	0.0220588	Yes
Zhang_X_2015_NM_ERR589874.NODE_105_121252	GUT_GENOME143185_16_1306	121252	Duplodnaviria;Heunggongvirae;Uroviricota;Caudoviricetes;Caudovirales	VOGdb markers	Methanobacteriota	Methanobacteria	Methanobacteriales	Methanobacteriaceae	Methanobrevibacter_A	Methanobrevibacter_A smithii_A	VC_329_5	No	NA	Not-determined	NA	0	China	0.00892857	No
Zhang_X_2015_NM_ERR589874.NODE_175_94802	ERR688624.NODE_1318_21	94802	Duplodnaviria;Heunggongvirae;Uroviricota;Caudoviricetes;Caudovirales;Myoviridae	VOGdb markers	Methanobacteriota	Methanobacteria	Methanobacteriales	Methanobacteriaceae	Methanobrevibacter_A	Methanobrevibacter_A smithii	VC_328_0	No	NA	High-quality	100	0	China	0.0157563	No
Zhang_X_2015_NM_ERR589874.NODE_6_309557	GUT_GENOME247414_2_5385	309557	Duplodnaviria;Heunggongvirae;Uroviricota;Caudoviricetes;Caudovirales	VOGdb markers	Methanobacteriota	Methanobacteria	Methanobacteriales	Methanobacteriaceae	Methanobrevibacter_A	Methanobrevibacter_A smithii	VC_357_7	No	NA	Low-quality	24.89	0	China	0.0189076	Yes
Zhang_X_2015_NM_ERR589874.NODE_71_147803	GUT_GENOME258086_2_60997	147803	Unassigned		Methanobacteriota	Methanobacteria	Methanobacteriales	Methanobacteriaceae	Methanobrevibacter_A	Methanobrevibacter_A smithii	VC_356_2	No	NA	Not-determined	NA	0	China	0.0273109	No
