# Supplementary material for: Metagenomic analysis reveals unexplored diversity of archaeal virome in the human gut
Source: Research Square preprint supplement (doi:10.21203/rs.3.rs-1667356/v1), 2022-05-25
Supplement: Supplementary file 14 [file 2bb5f23399ffa7b9c9dee29e.xlsx]

## Sheet: Sheet1
Body sites	Contig ID	Domain	Phylum	Class	Order	Family	Genus	Species
Oral	159227541.contig46403	Archaea	Methanobacteriota	Methanobacteria	Methanobacteriales	Methanobacteriaceae	Methanobrevibacter_A	Methanobrevibacter_A sp900319535
	159268001.contig218472	Archaea	Methanobacteriota	Methanobacteria	Methanobacteriales	Methanobacteriaceae	Methanobrevibacter_A	Methanobrevibacter_A sp900319535
	355657046.contig22723	Archaea	Methanobacteriota	Methanobacteria	Methanobacteriales	Methanobacteriaceae	Methanobrevibacter	Methanobrevibacter ruminantium_A
	604812005.contig52090	Archaea	Nanoarchaeota	Nanoarchaeia	UBA10117	ARS21	ARS21	ARS21 sp002686215
	675950834.contig110073	Archaea	Methanobacteriota	Methanobacteria	Methanobacteriales	Methanobacteriaceae	Methanobrevibacter	Methanobrevibacter ruminantium_A
	764083206.contig45278	Archaea	Methanobacteriota	Methanobacteria	Methanobacteriales	Methanobacteriaceae	Methanobrevibacter_A	Methanobrevibacter_A sp900319535
	765317243.contig32093	Archaea	Nanoarchaeota	Nanoarchaeia	Woesearchaeales	GW2011-AR9	UBA11998	UBA11998 sp11998u
	823052294.contig62856	Archaea	Methanobacteriota	Methanobacteria	Methanobacteriales	Methanobacteriaceae	Methanobrevibacter_A	Methanobrevibacter_A sp900319535
	863126187.contig39256	Archaea	Methanobacteriota	Methanobacteria	Methanobacteriales	Methanobacteriaceae	Methanobrevibacter_A	Methanobrevibacter_A sp900319535
	884797910.contig17827	Archaea	Methanobacteriota	Methanobacteria	Methanobacteriales	Methanobacteriaceae	Methanobrevibacter	Methanobrevibacter ruminantium_A
	SRS014271.scaffold142815_1	Archaea	Methanobacteriota	Methanobacteria	Methanobacteriales	Methanobacteriaceae	Methanobrevibacter_A	Methanobrevibacter_A sp900319535
	SRS014271.scaffold31786_1	Archaea	Methanobacteriota	Methanobacteria	Methanobacteriales	Methanobacteriaceae	Methanobrevibacter_A	Methanobrevibacter_A sp900319535
	SRS019494.contig4976	Archaea	Nanoarchaeota	Nanoarchaeia	Woesearchaeales	GW2011-AR9	UBA11998	UBA11998 sp11998u
	SRS021528.contig29580	Archaea	Methanobacteriota	Methanobacteria	Methanobacteriales	Methanobacteriaceae	Methanobrevibacter_A	Methanobrevibacter_A sp900319535
	SRS042589.contig10370	Archaea	Methanobacteriota	Methanobacteria	Methanobacteriales	Methanobacteriaceae	Methanobrevibacter	Methanobrevibacter ruminantium_A
	SRS077508.contig65815	Archaea	Methanobacteriota	Methanobacteria	Methanobacteriales	Methanobacteriaceae	Methanobrevibacter_A	Methanobrevibacter_A sp900319535
	SRS078733.contig32675	Archaea	Methanobacteriota	Methanobacteria	Methanobacteriales	Methanobacteriaceae	Methanobrevibacter_A	Methanobrevibacter_A sp900319535
	SRS143850.contig45463	Archaea	Methanobacteriota	Methanobacteria	Methanobacteriales	Methanobacteriaceae	Methanobrevibacter_A	Methanobrevibacter_A sp900319535
	SRS144014.contig17066	Archaea	Methanobacteriota	Methanobacteria	Methanobacteriales	Methanobacteriaceae	Methanobrevibacter_A	Methanobrevibacter_A sp900319535
	SRS144560.contig13886	Archaea	Methanobacteriota	Methanobacteria	Methanobacteriales	Methanobacteriaceae	Methanobrevibacter	Methanobrevibacter ruminantium_A
	SRS146738.contig28070	Archaea	Methanobacteriota	Methanobacteria	Methanobacteriales	Methanobacteriaceae	Methanobrevibacter_A	Methanobrevibacter_A sp900319535
	SRS147126.contig104245	Archaea	Methanobacteriota	Methanobacteria	Methanobacteriales	Methanobacteriaceae	Methanobrevibacter_A	Methanobrevibacter_A sp900319535
	SRS148284.contig14038	Archaea	Methanobacteriota	Methanobacteria	Methanobacteriales	Methanobacteriaceae	Methanobrevibacter	Methanobrevibacter ruminantium_A
Skin	159753524.contig4024	Archaea	Thermoproteota	Thermoproteia	Thermofilales	B20-G17	B14-G17	B14-G17 sp003649515
	159753524.contig4189	Archaea	Thermoproteota	Thermoproteia	Thermofilales	B20-G17	B14-G17	B14-G17 sp003649515
	SRS043610.contig5848	Archaea	Thermoproteota	Thermoproteia	Thermofilales	B20-G17	B14-G17	B14-G17 sp003649515
	SRS077745.contig24232	Archaea	Thermoproteota	Thermoproteia	Thermofilales	B20-G17	B14-G17	B14-G17 sp003649515
	SRS077863.contig1454	Archaea	Altarchaeota	Altarchaeia	IMC4	SCGC-AAA252-I15	SCGC-AAA252-I15	SCGC-AAA252-I15 sp000402775
Vagina	246515023.contig2445	Archaea	Methanobacteriota	Methanobacteria	Methanobacteriales	Methanobacteriaceae	Methanobrevibacter_A	Methanobrevibacter_A sp900319535
	765377934.contig282	Archaea	Methanobacteriota	Methanobacteria	Methanobacteriales	Methanobacteriaceae	Methanobrevibacter_A	Methanobrevibacter_A sp900319536
	SRS014415.contig26507	Archaea	Methanobacteriota	Methanobacteria	Methanobacteriales	Methanobacteriaceae	Methanobrevibacter_A	Methanobrevibacter_A sp900319537
	SRS019285.contig183	Archaea	Methanobacteriota	Methanobacteria	Methanobacteriales	Methanobacteriaceae	Methanobrevibacter_A	Methanobrevibacter_A sp900319538
	SRS023466.contig2566	Archaea	Methanobacteriota	Methanobacteria	Methanobacteriales	Methanobacteriaceae	Methanobrevibacter_A	Methanobrevibacter_A sp900319539
