# Supplementary material for: Metagenomic analysis reveals unexplored diversity of archaeal virome in the human gut
Source: Research Square preprint supplement (doi:10.21203/rs.3.rs-1667356/v1), 2022-05-25
Supplement: Supplementary file 18 [file bd213d08163ab202682f87bb.xlsx]

## Sheet: datasets sources
			Human subjects data
Study	Sequencing platform	Body region	Location of Reads	Health status	Lifestyle	Age group	Country of origin	Number of samples	archaeal contigs	spacers
Xie et al., 2016	Illumina	Gastrointestinal tract	EBI: PRJEB9584	Healthy		adult twins	UK	250	4800	1840
Feng et al., 2015	Illumina	Gastrointestinal tract	EBI: PRJEB7774	Healthy, advanced adenoma and carcinoma		45-86 years	Austria	156	2942	1417
Zeller et al., 2014	Illumina	Gastrointestinal tract	ENA: PRJEB6070	Colorectal carcinoma		Adults	France, Germany	199	4829	2062
Rampelli et al., 2015	Illumina	Gastrointestinal tract	SRA: PRJNA278393	Healthy	Hunter-Gatherer	8 - 70 years old	Tanzania, Italy	38	4	0
Rampelli et al., 2020	Illumina	Gastrointestinal tract	SRA: PRJNA553191	Extreme Longevity		22 - 104 years old	Italy	62	1235	651
Smits et al., 2017	Illumina	Gastrointestinal tract	SRA: PRJNA392012, PRJNA392180		Hunter-Gatherer	6- 55 years old	Tanzania	40	369	0
Zhang et al., 2015	Illumina	Gastrointestinal tract	EBI: PRJEB6997	Rheumatoid arthritis		18 - 65 years old	China	232	1357	529
Li et al., 2014	Illumina	Gastrointestinal tract	EBI: PRJEB5224				Denmark, Spain	249	486	0
Vatanen et al., 2016	Illumina	Gastrointestinal tract	SRA: PRJNA290380	Autoimmunity		Infants	Finland, Estonia, Russia	159	151	7
Enteritis	Illumina	Gastrointestinal tract	https://db.cngb.org/search/project/CNP0002257/	Enteritis			China	30	143	8
Qin et al., 2012	Illumina	Gastrointestinal tract	SRA: PRJNA422434	Type 2 diabetes		14 - 75 years old	China	145	93	7
HMP	Illumina	Gastrointestinal tract	https://portal.hmpdacc.org/	Health		18 - 40 years old	North America	711	1421	32
		Oral						1184	23	0
		Airways						247	0	0
		Skin						55	5	0
		Vagina						214	5	0
total								3971	17863	6553
EBI: European Bioinformatic Institute
ENA: European Nucleotide Archive database (http://www.ebi. ac.uk/ena)
SRA: Sequence Read Archive(www.ncbi.nlm.nih.gov/sra)
